# Supplementary material
Source: PubMed Central journal article supplement (PMC2818974)

## *Supporting Information*

# **Synthesis and Anticonvulsant Activities of *N*- (4'-Substituted)benzyl (*R*)-2-Acetamido-3- methoxypropionamides**

*Christophe Salomé,<sup>1</sup> Elise Salomé-Grosjean,<sup>1</sup> Ki Duk Park,<sup>1</sup> Pierre  
Morieux,<sup>1</sup> Robert Swendiman,<sup>1</sup> Erica DeMarco,<sup>1</sup> James P. Stables,<sup>2</sup> and  
Harold Kohn<sup>\*1,3</sup>*

<sup>1</sup>Division of Medicinal Chemistry and Natural Products, UNC Eshelman School of Pharmacy,  
University of North Carolina, Chapel Hill, North Carolina 27599-7568, USA

<sup>2</sup>Anticonvulsant Screening Program, National Institute of Neurological Disorders and Stroke, National  
Institutes of Health, 6001 Executive Blvd., Suite 2106, Rockville, MD 20892-9523, USA

<sup>3</sup>Department of Chemistry,  
University of North Carolina, Chapel Hill, North Carolina 27599-3290, USA

## Supporting Information

### Table of Contents

|                                                                                                                                                                                                                                                                                                                                               |     |
|-----------------------------------------------------------------------------------------------------------------------------------------------------------------------------------------------------------------------------------------------------------------------------------------------------------------------------------------------|-----|
| General Methods                                                                                                                                                                                                                                                                                                                               | S4  |
| 1. Preparation of ( <i>R</i> )- <i>N</i> -(2'-Fluoro)benzyl 2-Acetamido-3-methoxypropionamide (( <i>R</i> )- <b>4</b> )                                                                                                                                                                                                                       | S6  |
| 2. Preparation of ( <i>R</i> )- <i>N</i> -(2'-Trifluoromethoxy)benzyl 2-Acetamido-3-methoxypropionamide (( <i>R</i> )- <b>7</b> )                                                                                                                                                                                                             | S7  |
| 3. Preparation of ( <i>R</i> )- <i>N</i> -(3'-Trifluoromethoxy)benzyl 2-Acetamido-3-methoxypropionamide (( <i>R</i> )- <b>8</b> )                                                                                                                                                                                                             | S11 |
| 4. Preparation of ( <i>R</i> )- <i>N</i> -(4'-Trifluoromethoxy)benzyl 2-Acetamido-3-methoxypropionamide (( <i>R</i> )- <b>9</b> )                                                                                                                                                                                                             | S14 |
| 5. Preparation of ( <i>R</i> )- <i>N</i> -(4'-Methyl)benzyl 2-Acetamido-3-methoxypropionamide (( <i>R</i> )- <b>10</b> )                                                                                                                                                                                                                      | S17 |
| 6. Preparation of ( <i>R</i> )- and ( <i>S</i> )- <i>N</i> -(4'-Ethyl)benzyl 2-Acetamido-3-methoxypropionamide (( <i>R</i> )- and ( <i>S</i> )- <b>11</b> )                                                                                                                                                                                   | S20 |
| 7. Preparation of ( <i>R</i> )- <i>N</i> -(4'-Propyl)benzyl 2-Acetamido-3-methoxypropionamide (( <i>R</i> )- <b>12</b> )                                                                                                                                                                                                                      | S25 |
| 8. Preparation of ( <i>R</i> )- <i>N</i> -(4'- <i>iso</i> -Propyl)benzyl 2-Acetamido-3-methoxypropionamide (( <i>R</i> )- <b>13</b> )                                                                                                                                                                                                         | S26 |
| 9. Preparation of ( <i>R</i> )- <i>N</i> -(4'- <i>tert</i> -Butyl)benzyl 2-Acetamido-3-methoxypropionamide (( <i>R</i> )- <b>14</b> )                                                                                                                                                                                                         | S29 |
| 10. Preparation of ( <i>R</i> )- <i>N</i> -(4'-(Aminomethyl))benzyl 2-Acetamido-3-methoxypropionamide Hydrochloride (( <i>R</i> )- <b>15</b> ) and Preparation of ( <i>R</i> )- <i>N</i> -(4'-( <i>tert</i> -Butoxycarbonyl)aminomethyl)benzyl 2-Acetamido-3-methoxypropionamide (( <i>R</i> )- <b>16</b> )                                   | S32 |
| 11. Preparation of ( <i>R</i> )- <i>N</i> -(4'-(Methoxymethyl))benzyl 2-Acetamido-3-methoxypropionamide (( <i>R</i> )- <b>17</b> )                                                                                                                                                                                                            | S36 |
| 12. Preparation of ( <i>R</i> )- <i>N</i> -(4'-Trifluoromethyl)benzyl 2-Acetamido-3-methoxypropionamide (( <i>R</i> )- <b>18</b> )                                                                                                                                                                                                            | S39 |
| 13. Preparation of ( <i>R</i> )- <i>N</i> -(4'-(3-Hydroxypropyl))benzyl 2-Acetamido-3-methoxypropionamide (( <i>R</i> )- <b>19</b> )                                                                                                                                                                                                          | S43 |
| 14. Preparation of ( <i>R</i> )- <i>N</i> -(4'-(3-Methoxypropyl))benzyl 2-Acetamido-3-methoxypropionamide (( <i>R</i> )- <b>20</b> )                                                                                                                                                                                                          | S44 |
| 15. Preparation of ( <i>R</i> )- and ( <i>S</i> )- <i>N</i> -(4'-Vinyl)benzyl 2-Acetamido-3-methoxypropionamide (( <i>R</i> )- and ( <i>S</i> )- <b>21</b> )                                                                                                                                                                                  | S45 |
| 16. Preparation of ( <i>R</i> )- <i>N</i> -(Biphenyl-4-yl)methyl 2-Acetamido-3-methoxypropionamide (( <i>R</i> )- <b>22</b> )                                                                                                                                                                                                                 | S50 |
| 17. Preparation of ( <i>R</i> )- and ( <i>S</i> )- <i>N</i> -(4'-Ethynyl)benzyl 2-Acetamido-3-methoxypropionamide (( <i>R</i> )- and ( <i>S</i> )- <b>23</b> ) and Preparation of ( <i>R</i> )- and ( <i>S</i> )- <i>N</i> -(4'-(Trimethylsilyl)ethynyl)benzyl 2-Acetamido-3-methoxypropionamide (( <i>R</i> )- and ( <i>S</i> )- <b>26</b> ) | S53 |
| 18. Preparation of ( <i>R</i> )- <i>N</i> -(4'-(Prop-1-ynyl))benzyl 2-Acetamido-3-methoxypropionamide (( <i>R</i> )- <b>24</b> )                                                                                                                                                                                                              | S57 |
| 19. Preparation of ( <i>R</i> )- <i>N</i> -(4'-(3,3-Dimethylbut-1-ynyl))benzyl 2-Acetamido-3-methoxypropionamide (( <i>R</i> )- <b>25</b> )                                                                                                                                                                                                   | S58 |

## Supporting Information

|                                                                                                                                                                                                                                                                   |      |
|-------------------------------------------------------------------------------------------------------------------------------------------------------------------------------------------------------------------------------------------------------------------|------|
| 20. Preparation of ( <i>R</i> )- <i>N</i> -(4'-(3-Methoxyprop-1-ynyl))benzyl 2-Acetamido-3-methoxypropionamide (( <i>R</i> )- <b>27</b> )                                                                                                                         | S59  |
| 21. Preparation of ( <i>R</i> )- and ( <i>S</i> )- <i>N</i> -(4'-Cyano)benzyl 2-Acetamido-3-methoxypropionamide (( <i>R</i> )- and ( <i>S</i> )- <b>28</b> )                                                                                                      | S61  |
| 22. Preparation of ( <i>R</i> )- and ( <i>S</i> )- <i>N</i> -(4'-Formyl)benzyl 2-Acetamido-3-methoxypropionamide (( <i>R</i> )- and ( <i>S</i> )- <b>29</b> )                                                                                                     | S65  |
| 23. Preparation of ( <i>R</i> )- <i>N</i> -(4'-Carboxy)benzyl 2-Acetamido-3-methoxypropionamide (( <i>R</i> )- <b>30</b> ) and Preparation of ( <i>R</i> )- <i>N</i> -(4'-(Methyloxycarbonyl))benzyl 2-Acetamido-3-methoxypropionamide (( <i>R</i> )- <b>31</b> ) | S74  |
| 24. Preparation of ( <i>R</i> )- <i>N</i> -(4'-Amino)benzyl 2-Acetamido-3-methoxypropionamide (( <i>R</i> )- <b>32</b> )                                                                                                                                          | S78  |
| 25. Preparation of ( <i>R</i> )- <i>N</i> -(4'-(2,2,2-Trifluoroacetamido))benzyl 2-Acetamido-3-methoxypropionamide (( <i>R</i> )- <b>33</b> )                                                                                                                     | S81  |
| 26. Preparation of ( <i>R</i> )- and ( <i>S</i> )- <i>N</i> -(4'-Azido)benzyl 2-Acetamido-3-methoxypropionamide (( <i>R</i> )- and ( <i>S</i> )- <b>34</b> )                                                                                                      | S82  |
| 27. Preparation of ( <i>R</i> )- <i>N</i> -(4'-Methoxy)benzyl 2-Acetamido-3-methoxypropionamide (( <i>R</i> )- <b>35</b> )                                                                                                                                        | S87  |
| 28. Preparation of ( <i>R</i> )- <i>N</i> -(4'-Chloro)benzyl 2-Acetamido-3-methoxypropionamide (( <i>R</i> )- <b>36</b> )                                                                                                                                         | S89  |
| 29. Preparation of ( <i>R</i> )- <i>N</i> -(4'-Bromo)benzyl 2-Acetamido-3-methoxypropionamide (( <i>R</i> )- <b>37</b> )                                                                                                                                          | S92  |
| 30. Preparation of ( <i>R</i> )- and ( <i>S</i> )- <i>N</i> -(4'-Iodo)benzyl 2-Acetamido-3-methoxypropionamide (( <i>R</i> )- and ( <i>S</i> )- <b>38</b> )                                                                                                       | S96  |
| 31. Preparation of ( <i>R</i> )- <i>N</i> -(4'-Sulfamoyl)benzyl 2-Acetamido-3-methoxypropionamide (( <i>R</i> )- <b>39</b> )                                                                                                                                      | S100 |
| 32. Preparation of ( <i>R</i> )- <i>N</i> -(3',4'-Dichloro)benzyl 2-Acetamido-3-methoxypropionamide (( <i>R</i> )- <b>60</b> )                                                                                                                                    | S103 |
| 33. Preparation of ( <i>R</i> )- <i>N</i> -(2',4'-Dichloro)benzyl 2-Acetamido-3-methoxypropionamide (( <i>R</i> )- <b>61</b> )                                                                                                                                    | S107 |
| NMR Spectra                                                                                                                                                                                                                                                       | S112 |
| Table S1. Elemental Analysis of Newly Prepared Compounds                                                                                                                                                                                                          | S199 |
| Table S2. Mass Spectra Data of Select Compounds                                                                                                                                                                                                                   | S203 |

## ***Supporting Information***

**General Methods.** Melting points were determined in open capillary tubes using a Thomas-Hoover melting point apparatus and are uncorrected. Infrared spectra (IR) were run on an ATI Mattson Genesis FT-IR spectrometer. Absorption values are expressed in wavenumbers ( $\text{cm}^{-1}$ ). Optical rotations were obtained on a Jasco P-1030 polarimeter at the sodium D line (589 nm) using a 1 dm path length cell. NMR spectra were obtained at 300 MHz or 400 MHz ( $^1\text{H}$ ) and 75 MHz or 100 MHz ( $^{13}\text{C}$ ) using TMS as an internal standard. Chemical shifts ( $\delta$ ) are reported in parts per million (ppm) from tetramethylsilane. Low-resolution mass spectra were obtained with a BioToF-II-Bruker Daltonics spectrometer by Drs. Matt Crowe and S. Habibi at the University of North Carolina Department of Chemistry. The high-resolution mass spectrum was performed on a Bruker Apex-Q 12 Telsa FTICR spectrometer by Drs. Matt Crowe and S. Habibi. Microanalyses were performed by Atlantic Microlab, Inc. (Norcross, GA). Reactions were monitored by analytical thin-layer chromatography (TLC) plates (Aldrich, Cat # Z12272-6) and analyzed with 254 nm light. The reactions were purified by MPLC (CombiFlash Rf) with self-packed columns (silica gel from Dynamic Adsorbents Inc., Cat # 02826-25) or by flash column chromatography using silica gel (Dynamic Adsorbents Inc., Cat # 02826-25). All chemicals and solvents were reagent grade and used as obtained from commercial sources without further purification. THF was distilled from blue sodium benzophenone ketyl. Yields reported are for purified products and were not optimized. Compounds were checked by TLC,  $^1\text{H}$  and  $^{13}\text{C}$  NMR, MS, and elemental analyses. The analytical results are within +0.40% of the theoretical

### ***Supporting Information***

value. The TLC, NMR and the analytical data confirmed the purity of the products was  $\geq 95\%$ .

## Supporting Information

### 1. Preparation of (*R*)-*N*-(2'-Fluoro)benzyl 2-Acetamido-3-methoxypropionamide ((*R*)-4).

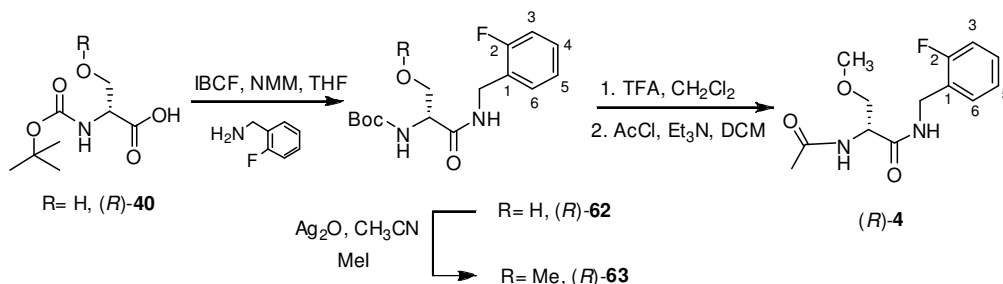

**Preparation of (*R*)-*N*-(2'-Fluoro)benzyl 2-*N*-(*tert*-Butoxycarbonyl)amino-3-hydroxypropionamide ((*R*)-62).** A THF solution (250 mL) of (*R*)-Boc-serine (5.00 g, 24.4 mmol) was stirred and cooled at  $-78\text{ }^{\circ}\text{C}$  under Ar and then 4-methylmorpholine (NMM) (3.0 mL, 29.2 mmol) was added dropwise. After 2 min of stirring at this temperature, isobutylchloroformate (IBCF) (4.0 mL, 29.2 mmol) was added dropwise leading to the precipitation of a white solid, and the reaction was allowed to proceed for additional 2 min and then (2-fluoro)benzylamine (3.66 g, 29.2 mmol) was added portionwise at  $-78\text{ }^{\circ}\text{C}$ . The mixture was allowed to stir at room temperature (2 h), and then the white solid filtered and the organic layer concentrated in vacuo. The residue was purified by flash chromatography on silica gel with EtOAc/hexanes (8/2 to 10/0) as the eluant to obtain (*R*)-*N*-(2'-fluoro)benzyl 2-*N*-(*tert*-butoxycarbonyl)amino-3-hydroxypropionamide (6.50 g, 85%) as a white sticky solid:  $R_f = 0.86$  (hexanes/EtOAc 5/5); mp  $87\text{--}92\text{ }^{\circ}\text{C}$ ;  $[\alpha]_{\text{D}}^{25.9} +34.0^{\circ}$  ( $c\ 1.0$ ,  $\text{CHCl}_3$ ); IR (nujol)  $3332, 3242, 2962, 2880, 1655, 1530, 1458, 1375, 1304, 1239, 1165, 1097, 1007, 866, 758\text{ cm}^{-1}$ ;  $^1\text{H NMR}$  ( $\text{CDCl}_3$ )  $\delta$  1.41 (s,  $(\text{CH}_3)_3\text{C}$ ), 3.38–3.47 (br m,  $\text{CHH}'\text{OH}$ ), 3.60–3.71 (br m,  $\text{CHH}'\text{OH}$ ), 4.04–4.20 (br m,  $\text{CHCH}_2, \text{OH}$ ), 4.44–4.53 (m,  $\text{CH}_2\text{N}$ ), 5.67 (d,  $J = 7.8\text{ Hz}$ , *tert*-BocNH), 6.99–7.11 (m, 2 ArH), 7.20–7.32 (m, 2 ArH, NH);  $^{13}\text{C NMR}$  ( $\text{CDCl}_3$ )  $\delta$  28.2 ( $(\text{CH}_3)_3\text{C}$ ), 37.4 (d,  $J = 4.2\text{ Hz}$ ,  $\text{NCH}_2$ ), 54.8 ( $\text{OCH}_2\text{CH}$ ), 62.7 ( $\text{OCH}_2\text{CH}$ ), 80.6 ( $(\text{CH}_3)_3\text{C}$ ), 115.4 (d,  $J = 21.1\text{ Hz}$ ,  $\text{C}_3$ ), 124.2 (d,  $J = 3.4\text{ Hz}$ ,  $\text{C}_5$ ), 124.7 (d,  $J = 14.8\text{ Hz}$ ,  $\text{C}_4$  or  $\text{C}_6$ ), 129.3 (d,  $J = 7.9\text{ Hz}$ ,  $\text{C}_6$  or  $\text{C}_4$ ),

## Supporting Information

129.6–129.7 (br d, **C**<sub>1</sub>), 156.3 (NC(O)), 160.8 (d,  $J = 245.0$  Hz, **CF**), 171.4 (**C**(O)); HRMS ( $M+Na^+$ )(ESI<sup>+</sup>) 335.1383 [ $M + Na^+$ ] (calcd for C<sub>15</sub>H<sub>21</sub>FN<sub>2</sub>O<sub>4</sub>Na<sup>+</sup> 335.1383); Anal. Calcd. for C<sub>15</sub>H<sub>21</sub>FN<sub>2</sub>O<sub>4</sub>: C, 57.68; H, 6.78; F, 6.08; N, 8.97. Found: C, 57.63; H, 6.87; F, 5.92; N, 9.01.

**Preparation of (*R*)-*N*-(2'-Fluoro)benzyl 2-*N*-(*tert*-Butoxycarbonyl)amino-3-methoxypropionamide ((*R*)-63).** Ag<sub>2</sub>O (118.5 g, 80.0 mmol) was added to a CH<sub>3</sub>CN solution (750 mL) of (*R*)-*N*-(2'-fluoro)benzyl 2-*N*-(*tert*-butoxycarbonyl)amino-3-hydroxypropionamide (5.00 g, 16.0 mmol) and CH<sub>3</sub>I (10.0 mL, 160.0 mmol) at room temperature under Ar. The reaction mixture was stirred at room temperature in the dark (3 d), filtered through a pad of Celite<sup>®</sup>, and the filtrate concentrated in vacuo to obtain a white solid. The solid was purified by flash column chromatography on silica gel with EtOAc/hexanes (3/7 to 6/4) as the eluant to obtain (*R*)-*N*-(2'-fluoro)benzyl 2-*N*-(*tert*-butoxycarbonyl)amino-3-methoxypropionamide as a white solid (3.40 g, 65%):  $R_f = 0.78$  (5/5 EtOAc/hexanes); mp 63–65 °C;  $[\alpha]^{25.1}_D -12.7^\circ$  ( $c$  1.0, CHCl<sub>3</sub>); IR (nujol) 3305, 2927, 2861, 1649, 1528, 1457, 1374, 1318, 1250, 1168, 1102, 1048, 913, 867, 761, 650 cm<sup>-1</sup>; <sup>1</sup>H NMR (CDCl<sub>3</sub>)  $\delta$  1.43 (s, C(CH<sub>3</sub>)<sub>3</sub>), 3.36 (s, OCH<sub>3</sub>), 3.46 (dd,  $J = 6.6, 8.7$  Hz, CHH'), 3.82 (dd,  $J = 3.3, 8.7$  Hz, CHH'), 4.22–4.30 (br m, CHCH<sub>2</sub>), 4.50–4.60 (br m, CH<sub>2</sub>N), 5.33–5.46 (br m, OC(O)NH), 6.78–6.85 (br m, CH<sub>2</sub>NH), 7.00–7.12 (m, 2 ArH), 7.22–7.34 (m, 2 ArH); <sup>13</sup>C NMR (CDCl<sub>3</sub>)  $\delta$  28.2 ((CH<sub>3</sub>)<sub>3</sub>C), 37.5 (d,  $J = 4.6$  Hz, NCH<sub>2</sub>), 53.8 (OCH<sub>2</sub>CH), 59.0 (OCH<sub>3</sub>), 71.9 (OCH<sub>2</sub>CH), 80.3 ((CH<sub>3</sub>)<sub>3</sub>C), 115.3 (d,  $J = 21.1$  Hz, **C**<sub>3</sub>), 124.2 (d,  $J = 3.4$  Hz, **C**<sub>5</sub>), 125.0 (d,  $J = 14.2$  Hz, **C**<sub>4</sub> or **C**<sub>6</sub>), 129.2 (d,  $J = 7.9$  Hz, **C**<sub>6</sub> or **C**<sub>4</sub>), 129.6–129.7 (br d, **C**<sub>1</sub>), 156.5 (NC(O)), 160.9 (d,  $J = 244.7$  Hz, **CF**), 170.4 (**C**(O)); HRMS ( $M+Cs^+$ )(ESI<sup>+</sup>) 459.0696 [ $M + Cs^+$ ] (calcd for C<sub>16</sub>H<sub>23</sub>FN<sub>2</sub>O<sub>4</sub>Cs<sup>+</sup> 459.0693); Anal. Calcd. for C<sub>16</sub>H<sub>23</sub>FN<sub>2</sub>O<sub>4</sub>: C, 58.88; H, 7.10; F, 5.82; N, 8.58. Found: C, 59.15; H, 7.20; F, 5.78; N, 8.52.

**Preparation of (*R*)-*N*-(2'-Fluoro)benzyl 2-Acetamido-3-methoxypropionamide ((*R*)-4).** TFA (10 mL) was added to a CH<sub>2</sub>Cl<sub>2</sub> solution

## Supporting Information

(200 mL) of (*R*)-*N*-(2'-fluoro)benzyl 2-*N*-(*tert*-butoxycarbonyl)amino-3-methoxypropionamide (2.90 g, 8.9 mmol), and the solution was stirred at room temperature (1 h). A saturated aqueous NaHCO<sub>3</sub> solution was added until pH ~ 9. The layers were separated and the aqueous layer was washed with CH<sub>2</sub>Cl<sub>2</sub> (2 x 100 mL). The organic layers were combined, dried (MgSO<sub>4</sub>), and concentrated in vacuo.

The residue was dissolved in CH<sub>2</sub>Cl<sub>2</sub> (100 mL) and then triethylamine (3.7 mL, 26.7 mmol) and acetyl chloride (1.3 mL, 17.8 mmol) were carefully added at 0 °C and the resulting solution was stirred at room temperature (2 h). An aqueous 10% citric acid solution (100 mL) was added and the organic layer was extracted with CH<sub>2</sub>Cl<sub>2</sub> (3 x 100 mL). The organic layers were combined, washed with a saturated aqueous NaHCO<sub>3</sub> solution (100 mL), dried (MgSO<sub>4</sub>), and concentrated in vacuo. The residue was purified by flash column chromatography on silica gel with EtOAc/MeOH (10/0 to 9/1) as the eluant to obtain (*R*)-*N*-(2'-fluoro)benzyl 2-acetamido-3-methoxypropionamide as a white solid (1.12 g, 88%): *R*<sub>f</sub> = 0.52 (EtOAc); mp 173–175 °C; [ $\alpha$ ]<sup>25.2</sup><sub>D</sub> –23.0° (*c* 1, CHCl<sub>3</sub>); IR (nujol) 3289, 2925, 2858, 1638, 1550, 1457, 1376, 1237, 1135, 977, 842, 754, 610 cm<sup>-1</sup>; <sup>1</sup>H NMR (CDCl<sub>3</sub>)  $\delta$  2.00 (s, CH<sub>3</sub>CO), 3.35 (s, OCH<sub>3</sub>), 3.43 (dd, *J* = 7.2, 9.0 Hz, CHH'), 3.76 (dd, *J* = 4.5, 9.0 Hz, CHH'), 4.46–4.63 (m, CH<sub>2</sub>N, CH), 4.84–4.91 (br s, NHCH<sub>2</sub>), 6.64 (d, *J* = 7.2 Hz, NHC(O)CH<sub>3</sub>), 7.00–7.13 (m, 2 ArH), 7.23–7.32 (m, 2 ArH), addition of excess of (*R*)-(-)-mandelic acid to a CDCl<sub>3</sub> solution of (*R*)-*N*-(2'-fluoro)benzyl 2-acetamido-3-methoxypropionamide gave only one signal for the acetyl methyl and one signal for the ether methyl protons; <sup>13</sup>C NMR (CDCl<sub>3</sub>)  $\delta$  23.0 (CH<sub>3</sub>C(O)), 37.4 (d, *J* = 4.0 Hz, NCH<sub>2</sub>), 52.4 (OCH<sub>2</sub>CH), 58.9 (OCH<sub>3</sub>), 71.8 (OCH<sub>2</sub>CH), 115.1 (d, *J* = 21.0 Hz, C<sub>3</sub>), 124.2 (d, *J* = 3.4 Hz, C<sub>5</sub>), 124.8 (d, *J* = 14.5 Hz, C<sub>4</sub> or C<sub>6</sub>), 129.1 (d, *J* = 8.2 Hz, C<sub>6</sub> or C<sub>4</sub>), 129.6–129.7 (br d, C<sub>1</sub>), 160.8 (d, *J* = 244.7 Hz, CF), 170.1, 170.4 (2 C(O)); HRMS (M+Cs<sup>+</sup>)(ESI<sup>+</sup>) 401.0278 [M + Cs<sup>+</sup>] (calcd for C<sub>13</sub>H<sub>17</sub>FN<sub>2</sub>O<sub>3</sub>Cs<sup>+</sup> 401.0274); Anal. Calcd. for C<sub>13</sub>H<sub>17</sub>FN<sub>2</sub>O<sub>3</sub>: C, 58.20; H, 6.39; F, 7.08; N, 10.44. Found: C, 58.12; H, 6.40; F, 6.96; N, 10.41.



## Supporting Information

### 2. Preparation of (*R*)-*N*-(2'-Trifluoromethoxy)benzyl 2-Acetamido-3-methoxypropionamide ((*R*)-7).

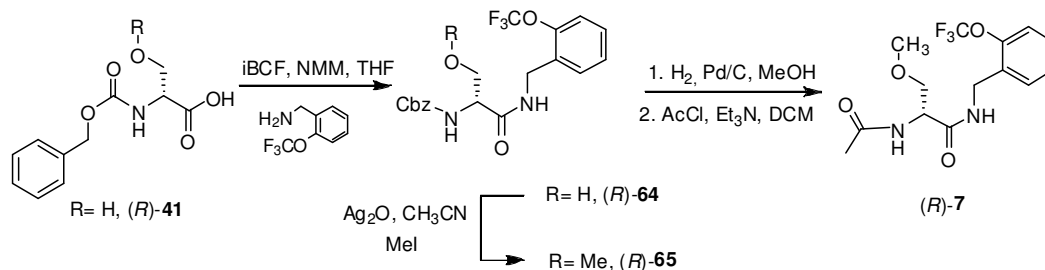

#### Preparation of (*R*)-*N*-(2'-Trifluoromethoxy)benzyl 2-*N*-

(benzyloxycarbonyl)amino-3-hydroxypropionamide ((*R*)-64). A THF solution (250 mL) of (*R*)-Cbz-serine (8.00 g, 33.5 mmol) was stirred and cooled at -78 °C under Ar and then 4-methylmorpholine (NMM) (4.4 mL, 40.2 mmol) was added dropwise. After 2 min of stirring at this temperature, isobutylchloroformate (IBCF) (5.3 mL, 40.2 mmol) was added dropwise leading to the precipitation of a white solid, and the reaction was allowed to proceed for additional 2 min and then (2'-trifluoromethoxy)benzylamine (7.67 g, 40.1 mmol) was added portionwise at -78 °C. The mixture was allowed to stir at room temperature (2 h), and then the white solid filtered and the organic layer concentrated in vacuo. The residue was purified by flash chromatography on silica gel with EtOAc/hexanes (6/4 to 10/0) as the eluant to obtain (*R*)-*N*-(2'-trifluoromethoxy)benzyl 2-*N*-(benzyloxycarbonyl)amino-3-hydroxypropionamide (5.50 g, 50%) as a white solid:  $R_f = 0.49$  (hexanes/EtOAc 5/5); mp 129–134 °C;  $[\alpha]^{24.5}_D -11.2^\circ$  ( $c$  1.0, DMSO); IR (nujol) 3296, 3172, 3096, 2944, 2860, 1658, 1544, 1457, 1378, 1271, 1157, 1090, 1026, 919, 758, 695, 634 cm<sup>-1</sup>; <sup>1</sup>H NMR (CDCl<sub>3</sub>)  $\delta$  2.97–3.06 (br m, OH), 3.59–3.72 (br m, CH), 4.09–4.26 (br m, CH<sub>2</sub>OH), 4.51 (d,  $J = 5.4$  Hz, CH<sub>2</sub>N), 5.10 (s, CH<sub>2</sub>O), 5.80–5.91 (br d, NH), 6.98–7.07 (br s, NH), 7.23–7.34 (m, 9 ArH); <sup>13</sup>C NMR (CDCl<sub>3</sub>)  $\delta$  38.2 (NCH<sub>2</sub>), 55.4 (OCH<sub>2</sub>CH), 62.7 (OCH<sub>2</sub>CH), 67.4 (PhCH<sub>2</sub>O), 120.5 (q,  $J = 256.8$  Hz, CF<sub>3</sub>), 120.6, 127.1, 128.0, 128.3, 128.6, 129.0, 129.8, 130.2, 135.9, 147.3 (10 ArC), 156.7 (NC(O)O), 170.9 (C(O)); HRMS (M+Cs<sup>+</sup>)(ESI<sup>+</sup>) 545.0300 [M + Cs<sup>+</sup>] (calcd for C<sub>19</sub>H<sub>19</sub>F<sub>3</sub>N<sub>2</sub>O<sub>5</sub>Cs<sup>+</sup> 545.0297);

## Supporting Information

Anal. Calcd. for C<sub>19</sub>H<sub>19</sub>F<sub>3</sub>N<sub>2</sub>O<sub>5</sub>: C, 55.34; H, 4.64; F, 13.82; N, 6.79. Found: C, 55.27; H, 4.62; F, 13.80; N, 6.74.

**Preparation of (*R*)-*N*-(2'-Trifluoromethoxy)benzyl 2-*N*-(Benzyloxycarbonyl)amino-3-methoxypropionamide ((*R*)-65).** Ag<sub>2</sub>O (13.37 g, 57.9 mmol) was added to a CH<sub>3</sub>CN solution (500 mL) of (*R*)-*N*-(2'-trifluoromethoxy)benzyl 2-*N*-(benzyloxycarbonyl)amino-3-hydroxypropionamide (3.80 g, 11.6 mmol) and CH<sub>3</sub>I (7.2 mL, 116.0 mmol) at room temperature under Ar. The reaction mixture was stirred at room temperature in the dark (3 d), filtered through a pad of Celite<sup>®</sup>, and the filtrate concentrated in vacuo to obtain a white solid. The solid was purified by flash column chromatography on silica gel with EtOAc/hexanes (50/50) as the eluant to obtain (*R*)-*N*-(2'-trifluoromethyl)benzyl 2-*N*-(benzyloxycarbonyl)amino-3-methoxypropionamide as a white solid (3.50 g, 88%): *R*<sub>f</sub> = 0.90 (5/5 EtOAc/hexanes); mp 125–126 °C; [α]<sup>25.1</sup><sub>D</sub> -13.1° (c 1.0, CHCl<sub>3</sub>); IR (nujol) 3141, 2957, 2728, 1685, 1642, 1540, 1459, 1376, 1277, 1217, 1163, 1046, 959, 843, 756, 697 cm<sup>-1</sup>; <sup>1</sup>H NMR (CDCl<sub>3</sub>) δ 3.35 (s, OCH<sub>3</sub>), 3.46 (dd, *J* = 6.9, 9.3 Hz, CHH'), 3.85 (dd, *J* = 3.9, 9.3 Hz, CHH'), 4.27–4.38 (br m, CHCH<sub>2</sub>), 4.54 (d, *J* = 6.0 Hz, CH<sub>2</sub>N), 5.12 (s, OCH<sub>2</sub>), 5.62–5.71 (br m, OC(O)NH), 6.74–6.85 (br m, CH<sub>2</sub>NH), 7.20–7.40 (m, 9 ArH); <sup>13</sup>C NMR (CDCl<sub>3</sub>) δ 38.7 (NCH<sub>2</sub>), 54.6 (OCH<sub>2</sub>CH), 59.2 (OCH<sub>3</sub>), 67.7 (PhCH<sub>2</sub>O), 72.3 (OCH<sub>2</sub>CH), 120.9 (1 ArC), 121.0 (q, *J* = 256.1 Hz, OCF<sub>3</sub>), 127.6, 128.6, 128.8, 129.0, 129.4, 130.3, 130.8, 136.4, 147.7 (9 ArC), 156.6 (NC(O)O), 170.5 (C(O)); HRMS (M+Cs<sup>+</sup>)(ESI<sup>+</sup>) 559.0457 [M + Cs<sup>+</sup>] (calcd for C<sub>20</sub>H<sub>21</sub>F<sub>3</sub>N<sub>2</sub>O<sub>5</sub>Cs<sup>+</sup> 559.0454); Anal. Calcd. for C<sub>20</sub>H<sub>21</sub>F<sub>3</sub>N<sub>2</sub>O<sub>5</sub>: C, 56.34; H, 4.96; F, 13.37; N, 6.57. Found: C, 56.30; H, 4.98; F, 13.22; N, 6.59.

**Preparation of (*R*)-*N*-(2'-Trifluoromethoxy)benzyl 2-Acetamido-3-methoxypropionamide ((*R*)-7).** An EtOH solution (200 mL) of (*R*)-*N*-(2'-trifluoromethoxy)benzyl 2-*N*-(benzyloxycarbonyl)amino-3-methoxypropionamide (3.40 g, 8.0 mmol) was treated with H<sub>2</sub> (1 atm) in presence of 10% Pd/C (340 mg) at room temperature (16 h). The mixture was carefully filtered through a bed

## Supporting Information

of Celite<sup>®</sup>. The pad was washed with MeOH and CH<sub>2</sub>Cl<sub>2</sub>, and the washings were collected and evaporated in vacuo.

The residue was dissolved in CH<sub>2</sub>Cl<sub>2</sub> (100 mL) and then triethylamine (3.3 mL, 24.0 mmol) and acetyl chloride (1.2 mL, 16.0 mmol) were carefully added at 0 °C and the resulting solution was stirred at room temperature (2 h). An aqueous 10% citric acid solution (100 mL) was added and then washed with CH<sub>2</sub>Cl<sub>2</sub> (3 x 100 mL). The organic layers were combined, washed with a saturated aqueous NaHCO<sub>3</sub> solution (100 mL), dried (MgSO<sub>4</sub>), and concentrated in vacuo. The residue was purified by flash column chromatography on silica gel with EtOAc/MeOH (10/0 to 9/1) as the eluant to obtain (*R*)-*N*-(2'-trifluoromethoxy)benzyl 2-acetamido-3-methoxypropionamide as a white solid (3.50 g, 88%): *R*<sub>f</sub> = 0.36 (EtOAc); mp 130–131 °C;  $[\alpha]_{\text{D}}^{24.8} -15.1^{\circ}$  (*c* 1, CHCl<sub>3</sub>); IR (nujol) 2919, 2858, 1640, 1547, 1458, 1272, 1203, 1164, 767, 712, 606 cm<sup>-1</sup>; <sup>1</sup>H NMR (CDCl<sub>3</sub>) δ 1.98 (s, CH<sub>3</sub>C(O)), 3.35 (s, OCH<sub>3</sub>), 3.45 (br dd, *J* = 7.2, 9.3 Hz, CHH'), 3.76 (dd, *J* = 4.2, 9.3 Hz, CHH'), 4.46–4.63 (m, CH<sub>2</sub>N, CH), 6.71 (br d, *J* = 6.3 Hz, NHC(O)CH<sub>3</sub>), 7.22–7.40 (m, CH<sub>2</sub>NH, 4 ArH), addition of excess (*R*)-(-)-mandelic acid to a CDCl<sub>3</sub> solution of (*R*)-*N*-(2'-trifluoromethoxy)benzyl 2-acetamido-3-methoxypropionamide gave only one signal for the acetyl methyl and one signal for the ether methyl protons; <sup>13</sup>C NMR (CDCl<sub>3</sub>) δ 22.9 (CH<sub>3</sub>C(O)), 38.1 (CH<sub>2</sub>N), 52.4 (CHCH<sub>2</sub>), 58.9 (OCH<sub>3</sub>), 71.7 (CH<sub>2</sub>OCH<sub>3</sub>), 120.4 (1 ArC), 120.5 (q, *J* = 256.1 Hz, OCF<sub>3</sub>), 127.0, 128.8, 129.7, 130.3, 147.1 (5 ArC), 170.2, 170.4 (2 C(O)); HRMS (M+Na<sup>+</sup>)(ESI<sup>+</sup>) 357.1038 [M + Na<sup>+</sup>] (calcd for C<sub>14</sub>H<sub>17</sub>F<sub>3</sub>N<sub>2</sub>O<sub>4</sub>Na<sup>+</sup> 357.1038); Anal. Calcd. for C<sub>14</sub>H<sub>17</sub>F<sub>3</sub>N<sub>2</sub>O<sub>4</sub>: C, 50.30; H, 5.13; F, 17.05; N, 8.38. Found: C, 50.28; H, 5.21; F, 17.30; N, 8.18.

### 3. Preparation of (*R*)-*N*-(3'-Trifluoromethoxy)benzyl 2-Acetamido-3-methoxypropionamide ((*R*)-8).

## Supporting Information

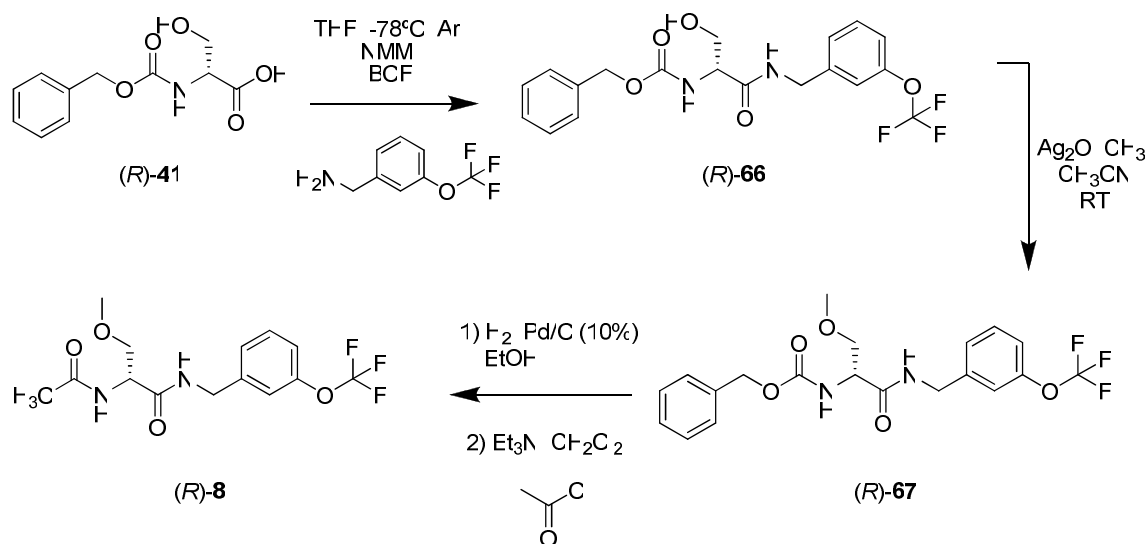

### Preparation of (*R*)-*N*-(3'-Trifluoromethoxy)benzyl 2-*N*-

**(Benzyloxycarbonyl)amino-3-hydroxypropionamide ((*R*)-66).** A THF solution (170 mL) of (*R*)-Cbz-serine (5.00 g, 20.9 mmol) was stirred and cooled at -78 °C under Ar. Then, 4-methylmorpholine (NMM) (2.8 mL, 25.1 mmol) was added dropwise. After 2 min of stirring at this temperature, isobutylchloroformate (IBCF) (3.3 mL, 25.1 mmol) was added dropwise leading to the precipitation of a white solid, and the reaction was allowed to proceed for additional 2 min. Then, 3-trifluoromethoxybenzylamine (4.80 g, 25.1 mmol) was added portionwise at -78 °C. The mixture was stirred at -78 °C (5 min) and then at room temperature (2 h). The white solid was removed by filtration and the organic layer was concentrated in vacuo. The residue was recrystallized with EtOAc to obtain (*R*)-*N*-(3'-trifluoromethoxy)benzyl 2-*N*-(benzyloxycarbonyl)amino-3-hydroxypropionamide as a white solid (2.30 g, 27%):  $R_f = 0.41$  (EtOAc/hexanes 7/3); mp 121 °C;  $[\alpha]^{24.2}_D -2.7^\circ$  ( $c$  1.0, CHCl<sub>3</sub>); IR (nujol) 2953, 1687, 1571, 1454, 1372, 1290, 1213, 1164, 1061, 793, 734 cm<sup>-1</sup>; <sup>1</sup>H NMR (DMSO-*d*<sub>6</sub>)  $\delta$  3.55–3.67 (m, CH<sub>2</sub>OH), 4.05–4.12 (m, CH), 4.34 (d,  $J = 5.8$  Hz, CH<sub>2</sub>N), 4.91 (t,  $J = 5.7$  Hz, OH), 5.01 (½ ABq,  $J = 12.6$  Hz, CHH'), 5.07 (½ ABq,  $J = 12.6$  Hz, CHH'), 7.02–7.46 (m, 9 ArH, NH), 8.54 (t,  $J = 5.8$  Hz, NH); <sup>13</sup>C NMR (CDCl<sub>3</sub>)  $\delta$  42.0 (NCH<sub>2</sub>), 57.9 (OCH<sub>2</sub>CH), 62.2 (OCH<sub>2</sub>CH), 66.0 (PhCH<sub>2</sub>O), 120.5 (q,  $J = 254.6$  Hz, OCF<sub>3</sub>), 119.5, 119.8, 126.4, 128.2, 128.3, 128.8, 130.5, 137.4, 142.9 (9 ArC), 149.0 (COCF<sub>3</sub>), 156.5 (NC(O)O), 171.0 (C(O)); LRMS (M+Na<sup>+</sup>) (ESI<sup>+</sup>) 435.1 [M+Na<sup>+</sup>] (calcd for

## Supporting Information

$C_{19}H_{19}F_3N_2O_5Na^+$  435.1); Anal. Calcd. for  $C_{19}H_{19}F_3N_2O_5$ : C, 55.34; H, 4.64; F, 13.82; N, 6.79. Found: C, 55.44; H, 4.59; F, 13.66; N, 6.79.

**Preparation of (*R*)-*N*-(3'-Trifluoromethoxy)benzyl 2-*N*-(Benzyloxycarbonyl)amino-3-methoxypropionamide ((*R*)-67).**  $Ag_2O$  (5.50 g, 23.6 mmol) was added to a  $CH_3CN$  solution (100 mL) of (*R*)-*N*-(3'-trifluoromethoxy)benzyl 2-*N*-(benzyloxycarbonyl)amino-3-hydroxypropionamide (1.95 g, 4.72 mmol) and  $CH_3I$  (2.9 mL, 47.2 mmol) at room temperature under Ar. The reaction mixture was stirred at room temperature in the dark (3 d), filtered through a Celite<sup>®</sup> pad, and the filtrate was concentrated in vacuo. The residue was recrystallized with EtOAc to obtain (*R*)-*N*-(3'-trifluoromethoxy)benzyl 2-*N*-(benzyloxycarbonyl)amino-3-methoxypropionamide as a white solid (2.00 g, quantitative):  $R_f = 0.74$  (EtOAc/hexanes, 7/3); mp 117–118 °C;  $[\alpha]^{25.7}_D -20.8^\circ$  ( $c$  1.0,  $CHCl_3$ ); IR (nujol) 2922, 2857, 1685, 1649, 1548, 1457, 1378, 1266, 1161, 1050, 964, 696  $cm^{-1}$ ;  $^1H$  NMR ( $CDCl_3$ )  $\delta$  3.37 (s,  $OCH_3$ ), 3.50 (dd,  $J = 6.5, 9.0$  Hz,  $CHH'$ ), 3.88 (dd,  $J = 3.6, 9.0$  Hz,  $CHH'$ ), 4.30–4.40 (br m,  $CHCH_2$ ,  $CH_2N$ ), 5.13 (s,  $OCH_2$ ), 5.62–5.72 (br m,  $NH$ ), 6.71–6.80 (br m,  $NH$ ), 7.11–7.19 (m, 3  $ArH$ ), 7.32–7.37 (m, 6  $ArH$ );  $^{13}C$  NMR ( $CDCl_3$ )  $\delta$  42.7 ( $NCH_2$ ), 54.4 ( $OCH_2CH$ ), 59.0 ( $OCH_3$ ), 67.3 ( $ArCH_2O$ ), 71.9 ( $OCH_2CH$ ), 120.4 (q,  $J = 255.6$  Hz,  $OCF_3$ ), 119.7, 125.5, 128.1, 128.3, 128.5, 129.9, 135.9, 140.4 (8  $ArC$ ), 149.5 ( $COCF_3$ ), 156.1 ( $NC(O)O$ ), 170.1 ( $C(O)$ ), one signal was not detected and is believed to overlap with nearby peaks; LRMS ( $M+Na^+$ ) ( $ESI^+$ ) 449.1 [ $M+Na^+$ ] (calcd for  $C_{20}H_{21}F_3N_2O_5Na^+$  449.1); Anal. Calcd. for  $C_{20}H_{21}F_3N_2O_5$ : C, 56.34; H, 4.96; F, 13.37; N, 6.57. Found: C, 56.15; H, 4.86; F, 13.23; N, 6.48.

**Preparation of (*R*)-*N*-(3'-Trifluoromethoxy)benzyl 2-Acetamido-3-methoxypropionamide ((*R*)-8).** An EtOH solution (200 mL) of (*R*)-*N*-(3'-trifluoromethoxy)benzyl 2-*N*-(benzyloxycarbonyl)amino-3-methoxypropionamide (1.80 g, 4.2 mmol) was treated with  $H_2$  (1 atm) in presence of 10% Pd/C (180 mg) at room temperature (16 h). The mixture was carefully filtered through a bed of Celite<sup>®</sup> and the filtrate was evaporated in vacuo to obtain a yellow oil.

## Supporting Information

The oil was dissolved in CH<sub>2</sub>Cl<sub>2</sub> (50 mL) and then triethylamine (0.7 mL, 5.0 mmol) and acetyl chloride (0.35 mL, 5.0 mmol) were carefully added at 0 °C and the resulting solution was stirred at room temperature (2 h). An aqueous 10% citric acid solution (50 mL) was added and the organic layer was washed with CH<sub>2</sub>Cl<sub>2</sub> (3 x 50 mL). The organic layers were combined, washed with a saturated NaHCO<sub>3</sub> solution (50 mL), dried (Na<sub>2</sub>SO<sub>4</sub>), and concentrated in vacuo. The residue was recrystallized in EtOAc to obtain (*R*)-*N*-(3'-trifluoromethoxy)benzyl 2-acetamido-3-methoxypropionamide as a white solid (750 mg, 54%): *R*<sub>f</sub> = 0.33 (EtOAc); mp = 147–148 °C; [α]<sup>25.0</sup><sub>D</sub> –12.1° (c 1.0, CHCl<sub>3</sub>); IR (nujol) 3287, 3041, 2859, 2355, 1637, 1552, 1456, 1377, 1272, 1214, 1150, 715, 610 cm<sup>-1</sup>; <sup>1</sup>H NMR (CDCl<sub>3</sub>) δ 2.04 (s, CH<sub>3</sub>CO), 3.39 (s, OCH<sub>3</sub>), 3.44 (dd, *J* = 7.6, 9.0 Hz, CHH'), 3.83 (dd, *J* = 4.2, 9.0 Hz, CHH'), 4.43–4.60 (m, CH<sub>2</sub>N, CH), 6.38–6.46 (br d, NH(CO)CH<sub>3</sub>), 6.82–6.91 (br t, CH<sub>2</sub>NH), 7.11–7.15 (m, 2 ArH), 7.19 (d, *J* = 7.8 Hz, 1 ArH), 7.36 (dt, *J* = 1.9, 7.8 Hz, 1 ArH), addition of excess (*R*)-(-)-mandelic acid to a CDCl<sub>3</sub> solution of (*R*)-*N*-(3'-trifluoromethoxy)benzyl 2-acetamido-3-methoxypropionamide gave only one signal for the acetyl methyl and one signal for the ether methyl protons; <sup>13</sup>C NMR (CDCl<sub>3</sub>) δ 23.1 (CH<sub>3</sub>CO), 42.8 (CH<sub>2</sub>N), 52.5 (CHCH<sub>2</sub>), 59.0 (OCH<sub>3</sub>), 71.6 (CH<sub>2</sub>OCH<sub>3</sub>), 120.4 (q, *J* = 255.6 Hz, OCF<sub>3</sub>), 119.7, 119.8, 125.6, 130.0, 140.4 (5 ArC), 149.5 (COCF<sub>3</sub>), 170.2, 170.4 (2 C(O)); LRMS (M+Na<sup>+</sup>) (ESI<sup>+</sup>) 357.1 [M+Na<sup>+</sup>] (calcd for C<sub>14</sub>H<sub>17</sub>F<sub>3</sub>N<sub>2</sub>O<sub>4</sub>Na<sup>+</sup> 357.1); Anal. Calcd. for C<sub>14</sub>H<sub>17</sub>F<sub>3</sub>N<sub>2</sub>O<sub>4</sub>: C, 50.30; H, 5.13; F, 17.05; N, 8.38. Found: C, 50.25; H, 5.07; F, 16.78; N, 8.17.

### 4. Preparation of (*R*)-*N*-(4'-Trifluoromethoxy)benzyl 2-Acetamido-3-methoxypropionamide ((*R*)-9).

## Supporting Information

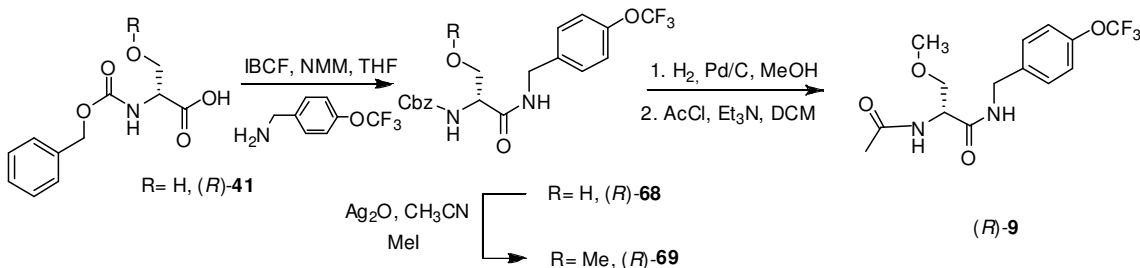

### Preparation of **(R)-N-(4'-Trifluoromethoxy)benzyl 2-N-**

**(Benzyloxycarbonyl)amino-3-hydroxypropionamide ((R)-68)**. A THF solution (200 mL) of **(R)-Cbz-serine** (6.00 g, 25.1 mmol) was stirred and cooled at -78 °C under Ar and then 4-methylmorpholine (NMM) (3.3 mL, 30.1 mmol) was added dropwise. After 2 min of stirring at this temperature, isobutylchloroformate (IBCF) (3.9 mL, 30.1 mmol) was added dropwise leading to the precipitation of a white solid, and the reaction was allowed to proceed for additional 2 min and then 4-trifluoromethoxybenzylamine (4.6 mL, 30.1 mmol) was added portionwise at -78 °C. The mixture was allowed to stir at room temperature (2 h), and then the white solid filtered and the organic layer concentrated in vacuo. The residue was recrystallized in EtOAc to obtain **(R)-N-(4'-trifluoromethoxy)benzyl 2-N-**(benzyloxycarbonyl)amino-3-hydroxypropionamide as a white solid (6.10 g, 59%):  $R_f = 0.30$  (hexanes/EtOAc 5/5); mp 189–190 °C;  $[\alpha]_D^{27.4} -6.5^\circ$  ( $c$  1.0, DMSO); IR (nujol) 3278, 3143, 2926, 2866, 1691, 1645, 1539, 1457, 1374, 1278, 1224, 1157, 1025, 963 739, 690 cm<sup>-1</sup>; <sup>1</sup>H NMR (DMSO-*d*<sub>6</sub>)  $\delta$  3.56 (m, CHH'), 4.05–4.12 (br dd, CH), 4.31 (d,  $J = 5.7$  Hz, CH<sub>2</sub>N), 4.91 (t,  $J = 5.5$  Hz, OH), 5.04 (s, CH<sub>2</sub>O), 7.25–7.38 (m, NH, 9 ArH), 8.50 (t,  $J = 5.7$  Hz, CH<sub>2</sub>NH); <sup>13</sup>C NMR (DMSO-*d*<sub>6</sub>)  $\delta$  41.3 (NCH<sub>2</sub>), 57.3 (OCH<sub>2</sub>CH), 61.7 (OCH<sub>2</sub>CH), 65.5 (PhCH<sub>2</sub>O), 120.0 (q,  $J = 254.4$  Hz, OCF<sub>3</sub>), 120.7, 127.6, 127.7, 128.2, 128.7, 136.9, 138.9, (7 ArC), 147.0 (q,  $J = 1.7$  Hz, COCF<sub>3</sub>), 155.9 (NC(O)O), 170.3 (C(O)); HRMS (M+H<sup>+</sup>)(ESI<sup>+</sup>) 413.1325 [M + H<sup>+</sup>] (calcd for C<sub>19</sub>H<sub>19</sub>F<sub>3</sub>N<sub>2</sub>O<sub>5</sub>H<sup>+</sup> 413.1324); Anal. Calcd. for C<sub>19</sub>H<sub>19</sub>F<sub>3</sub>N<sub>2</sub>O<sub>5</sub>: C, 55.34; H, 4.64; F, 13.82; N, 6.79. Found: C, 55.06; H, 4.61; F, 13.70; N, 6.74.

## Supporting Information

**Preparation of (*R*)-*N*-(4'-Trifluoromethoxy)benzyl 2-*N*-(benzyloxycarbonyl)amino-3-methoxypropionamide ((*R*)-69).** Ag<sub>2</sub>O (15.56 g, 66.7 mmol) was added to a CH<sub>3</sub>CN solution (250 mL) of (*R*)-*N*-(4'-trifluoromethoxy)benzyl 2-*N*-(benzyloxycarbonyl)amino-3-hydroxypropionamide (5.50 g, 13.4 mmol) and CH<sub>3</sub>I (8.3 mL, 134.0 mmol) at room temperature under Ar. The reaction mixture was stirred at room temperature in the dark (3 d), filtered through a pad of Celite<sup>®</sup>, and the filtrate was concentrated in vacuo. The solid was purified by flash column chromatography on silica gel with EtOAc/hexanes (50/50) as the eluant to obtain (*R*)-*N*-(4'-trifluoromethoxy)benzyl 2-*N*-(benzyloxycarbonyl)amino-3-methoxypropionamide as a white solid (4.40 g, 97%): *R*<sub>f</sub> = 0.77 (EtOAc/hexanes 5/5); mp 114–115 °C; [ $\alpha$ ]<sup>24.5</sup><sub>D</sub> –21.4° (c 1.0, CHCl<sub>3</sub>); IR (nujol) 3279, 3089, 2958, 2858, 1638, 1553, 1456, 1377, 1285, 1221, 1148, 988, 918, 841, 725, 610 cm<sup>-1</sup>; <sup>1</sup>H NMR (CDCl<sub>3</sub>)  $\delta$  3.36 (s, OCH<sub>3</sub>), 3.49 (dd, *J* = 6.3, 9.0 Hz, CHH'), 3.86 (dd, *J* = 3.9, 9.0 Hz, CHH'), 4.29–4.40 (br m, CHCH<sub>2</sub>), 4.46 (d, *J* = 6.3 Hz, CH<sub>2</sub>N), 5.12 (s, OCH<sub>2</sub>), 5.53–5.64 (br s, NH), 6.74–6.84 (br m, NH), 7.15 (d, *J* = 8.4 Hz, 2 ArH), 7.24–7.39 (m, 7 ArH); <sup>13</sup>C NMR (CDCl<sub>3</sub>)  $\delta$  42.7 (NCH<sub>2</sub>), 54.4 (OCH<sub>2</sub>CH), 59.1 (OCH<sub>3</sub>), 67.3 (OCH<sub>2</sub>), 71.9 (OCH<sub>2</sub>CH), 120.4 (q, *J* = 255.5 Hz, OCF<sub>3</sub>), 121.2, 128.2, 128.3, 128.6, 128.7, 135.9, 136.7 (7 ArC), 148.5 (COCF<sub>3</sub>), 156.1 (NC(O)O), 170.0 (C(O)); HRMS (M+H<sup>+</sup>)(ESI<sup>+</sup>) 427.1481 [M + H<sup>+</sup>] (calcd for C<sub>20</sub>H<sub>21</sub>F<sub>3</sub>N<sub>2</sub>O<sub>5</sub>H<sup>+</sup> 427.1481); Anal. Calcd. for C<sub>20</sub>H<sub>21</sub>F<sub>3</sub>N<sub>2</sub>O<sub>5</sub>: C, 56.34; H, 4.96; F, 13.37; N, 6.57. Found: C, 56.34; H, 4.97; F, 13.28; N, 6.63.

**Preparation of (*R*)-*N*-(4'-Trifluoromethoxy)benzyl 2-Acetamido-3-methoxypropionamide ((*R*)-9).** An EtOH solution (400 mL) of (*R*)-*N*-(4'-trifluoromethoxy)benzyl 2-*N*-(benzyloxycarbonyl)amino-3-methoxypropionamide (3.90 g, 9.2 mmol) was treated with H<sub>2</sub> (1 atm) in presence of 10% Pd/C (390 mg) at room temperature (16 h). The mixture was carefully filtered through a bed of Celite<sup>®</sup> and the filtrate was evaporated in vacuo to obtain a brown oil: <sup>1</sup>H NMR (CDCl<sub>3</sub>)  $\delta$  1.44–1.95 (br s, NH<sub>2</sub>), 3.38 (s, OCH<sub>3</sub>), 3.50–3.67 (br m, CH<sub>2</sub>, CH), 4.46



## Supporting Information

(d,  $J = 5.7$  Hz,  $\text{NCH}_2$ ), 7.17 (d,  $J = 8.0$  Hz, 2 ArH), 7.31 (d,  $J = 8.0$  Hz, 2 ArH), 7.80–8.00 (br s,  $\text{NHC(O)}$ ).

The oil was dissolved in  $\text{CH}_2\text{Cl}_2$  (100 mL) and then triethylamine (1.5 mL, 11.0 mmol) and acetyl chloride (0.78 mL, 11.0 mmol) were carefully added at 0 °C and the resulting solution was stirred at room temperature (2 h). An aqueous 10% citric acid solution (100 mL) was added and the organic layer was extracted with  $\text{CH}_2\text{Cl}_2$  (3 x 100 mL). The organic layers were combined, washed with a saturated  $\text{NaHCO}_3$  solution (100 mL), dried ( $\text{MgSO}_4$ ), and concentrated in vacuo. The residue was recrystallized in EtOAc to obtain (*R*)-*N*-(4'-trifluoromethoxy)benzyl 2-acetamido-3-methoxypropionamide as a white solid (2.50 g, 83%):  $R_f = 0.49$  (EtOAc); mp 134–135 °C;  $[\alpha]^{24.9}_{\text{D}} -17.6^\circ$  ( $c$  0.5,  $\text{CHCl}_3$ ); IR (nujol) 3279, 3088, 2958, 2858, 1638, 1553, 1456, 1377, 1285, 1221, 1148, 988, 918, 841, 725  $\text{cm}^{-1}$ ;  $^1\text{H}$  NMR ( $\text{CDCl}_3$ )  $\delta$  2.04 (s,  $\text{CH}_3\text{CO}$ ), 3.39 (s,  $\text{OCH}_3$ ), 3.44 (dd,  $J = 7.5, 9.0$  Hz,  $\text{CHH}'$ ), 3.82 (dd,  $J = 4.2, 9.0$  Hz,  $\text{CHH}'$ ), 4.44–4.52 (m,  $\text{CH}_2\text{N}$ ), 4.52–4.59 (m,  $\text{CH}$ ), 6.41 (br d,  $J = 6.6$  Hz,  $\text{NHC(O)CH}_3$ ), 6.78–6.89 (br t,  $\text{CH}_2\text{NH}$ ), 7.18 (d,  $J = 8.1$  Hz, 2 ArH), 7.29 (d,  $J = 8.1$  Hz, 2 ArH), addition of excess (*R*)-(-)-mandelic acid to a  $\text{CDCl}_3$  solution of (*R*)-*N*-(4'-trifluoromethoxy)benzyl 2-acetamido-3-methoxypropionamide gave only one signal for the acetyl methyl and one signal for the ether methyl protons;  $^{13}\text{C}$  NMR ( $\text{CDCl}_3$ ) 23.1 ( $\text{CH}_3\text{CO}$ ), 42.7 ( $\text{CH}_2\text{N}$ ), 52.5 ( $\text{CHCH}_2$ ), 59.1 ( $\text{OCH}_3$ ), 71.7 ( $\text{CH}_2\text{OCH}_3$ ), 120.4 (q,  $J = 255.5$  Hz,  $\text{CF}_3$ ), 121.2, 128.7, 136.7 (3 ArC), 148.4 (app d,  $J = 1.7$  Hz,  $\text{COCF}_3$ ), 170.1, 170.4 (2 C(O)); HRMS ( $\text{M}+\text{H}^+$ )(ESI $^+$ ) 335.1219 [ $\text{M} + \text{H}^+$ ] (calcd for  $\text{C}_{14}\text{H}_{17}\text{F}_3\text{N}_2\text{O}_4\text{H}^+$  335.1218); Anal. Calcd. for  $\text{C}_{14}\text{H}_{17}\text{F}_3\text{N}_2\text{O}_4$ : C, 50.30; H, 5.13; F, 17.05; N, 8.38. Found: C, 50.45; H, 5.13; F, 17.18; N, 8.39.

## 5. Preparation of (*R*)-*N*-(4'-Methyl)benzyl 2-Acetamido-3-methoxypropionamide ((*R*)-10).

## Supporting Information

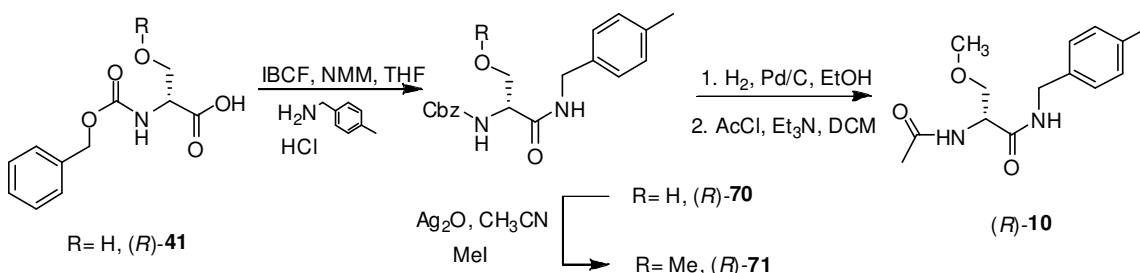

### Preparation of (R)-N-(4'-Methyl)benzyl 2-N-

**(Benzyloxycarbonyl)amino-3-hydroxypropionamide ((R)-70).** A THF solution (300 mL) of (R)-Cbz-serine (10.00 g, 41.8 mmol) was stirred and cooled at -78 °C under Ar and then (4-methyl)morpholine (NMM) (5.5 mL, 50.2 mmol) was added dropwise. After 2 min of stirring at this temperature, isobutylchloroformate (IBCF) (6.6 mL, 50.2 mmol) was added dropwise leading to the precipitation of a white solid, and the reaction was allowed to proceed for additional 2 min and then (4-methyl)benzylamine (6.3 mL, 50.2 mmol) was added portionwise at -78 °C. The mixture was allowed to stir at room temperature (2 h), and then the white solid filtered and the organic layer concentrated in vacuo. The residue was recrystallized with EtOAc to obtain (R)-N-(4'-methyl)benzyl 2-N-(benzyloxycarbonyl)amino-3-hydroxypropionamide as a white solid (4.80 g, 32%):  $R_f = 0.19$  (hexanes/EtOAc 5/5); mp 129 °C;  $[\alpha]^{25.4}_D +14.3^\circ$  ( $c$  1.0, CHCl<sub>3</sub>); IR (nujol) 2896, 2728, 1712, 1641, 1572, 1522, 1457, 1374, 1314, 1240, 1048, 723 cm<sup>-1</sup>; <sup>1</sup>H NMR (CDCl<sub>3</sub>)  $\delta$  2.32 (s, CH<sub>3</sub>), 3.67 (dd,  $J = 4.8, 11.1$  Hz, CHH'), 4.07–4.16 (br dd, CHH'), 4.19–4.28 (br m, CH), 4.38 (d,  $J = 6.0$  Hz, CH<sub>2</sub>N), 5.08 (s, CH<sub>2</sub>O), 5.87 (d,  $J = 6.6$  Hz, NH), 6.87–6.97 (br s, NH), 7.11 (s, 4 ArH), 7.33 (s, 5 ArH); <sup>13</sup>C NMR (CDCl<sub>3</sub>)  $\delta$  21.1 (CH<sub>3</sub>), 43.3 (NCH<sub>2</sub>), 55.2 (OCH<sub>2</sub>CH), 62.8 (OCH<sub>2</sub>CH), 67.4 (PhCH<sub>2</sub>O), 127.5, 128.1, 128.3, 128.6, 129.4, 134.5, 135.9, 137.3 (8 ArC), 156.7 (NC(O)O), 170.7 (C(O)); HRMS (M+H<sup>+</sup>)(ESI<sup>+</sup>) 343.1658 [M + H<sup>+</sup>] (calcd for C<sub>19</sub>H<sub>22</sub>N<sub>2</sub>O<sub>4</sub>H<sup>+</sup> 343.1658); Anal. Calcd. for C<sub>19</sub>H<sub>22</sub>N<sub>2</sub>O<sub>4</sub>: C, 66.65; H, 6.48; N, 8.18. Found: C, 66.49; H, 6.53; N, 8.07.

### Preparation of (R)-N-(4'-Methyl)benzyl 2-N-

**(Benzyloxycarbonyl)amino-3-methoxypropionamide ((R)-71).** Ag<sub>2</sub>O (15.32 g,

## Supporting Information

65.8 mmol) was added to a CH<sub>3</sub>CN solution (300 mL) of (*R*)-*N*-(4'-methyl)benzyl 2-*N*-(benzyloxycarbonyl)amino-3-hydroxypropionamide (4.50 g, 13.1 mmol) and CH<sub>3</sub>I (8.2 mL, 131.5 mmol) at room temperature under Ar. The reaction mixture was stirred at room temperature in the dark (2 d), filtered through a pad of Celite<sup>®</sup>, and the filtrate concentrated in vacuo to obtain a white solid. The solid was purified by flash column chromatography on silica gel with EtOAc/hexanes (0/100 to 50/50) as the eluant to obtain (*R*)-*N*-(4'-methyl)benzyl 2-*N*-(benzyloxycarbonyl)amino-3-methoxypropionamide as a white solid (3.40 g, 73%): *R*<sub>f</sub> = 0.51 (1/1 EtOAc/hexanes); mp 126–127 °C; [ $\alpha$ ]<sup>25.8</sup><sub>D</sub> –24.7° (c 1.0, CHCl<sub>3</sub>); IR (nujol) 3253, 2947, 2862, 1693, 1534, 1459, 1375, 1314, 1258, 1125, 1054, 964, 733 cm<sup>-1</sup>; <sup>1</sup>H NMR (CDCl<sub>3</sub>)  $\delta$  2.33 (s, PhCH<sub>3</sub>), 3.35 (s, OCH<sub>3</sub>), 3.49 (dd, *J* = 6.6, 9.0 Hz, CHH'), 3.84 (dd, *J* = 3.6, 9.0 Hz, CHH'), 4.29–4.38 (br m, CHCH<sub>2</sub>), 4.41 (d, *J* = 5.7 Hz, CH<sub>2</sub>N), 5.10 (s, OCH<sub>2</sub>), 5.62–5.75 (br m, OC(O)NH), 6.61–6.72 (br m, CH<sub>2</sub>NH), 7.13 (s, 4 ArH), 7.34 (s, 5 ArH); <sup>13</sup>C NMR (CDCl<sub>3</sub>)  $\delta$  21.0 (CH<sub>3</sub>), 43.3 (NCH<sub>2</sub>), 54.3 (OCH<sub>2</sub>CH), 59.0 (OCH<sub>3</sub>), 67.2 (PhCH<sub>2</sub>O), 72.0 (OCH<sub>2</sub>CH), 127.5, 128.1, 128.2, 128.5, 129.3, 134.8, 136.0, 137.2 (8 ArC), 156.1 (NC(O)O), 169.7 (C(O)); HRMS (M+H<sup>+</sup>)(ESI<sup>+</sup>) 357.1815 [M + H<sup>+</sup>] (calcd for C<sub>20</sub>H<sub>24</sub>N<sub>2</sub>O<sub>4</sub>H<sup>+</sup> 357.1814); Anal. Calcd. for C<sub>20</sub>H<sub>24</sub>N<sub>2</sub>O<sub>4</sub>: C, 67.40; H, 6.79; N, 7.86. Found: C, 67.22; H, 6.82; N, 7.82.

**Preparation of (*R*)-*N*-(4'-Methyl)benzyl 2-Acetamido-3-methoxypropionamide ((*R*)-10).** An EtOH solution (250 mL) of (*R*)-*N*-(4'-methyl)benzyl 2-*N*-(benzyloxycarbonyl)amino-3-methoxypropionamide (3.20 g, 9.0 mmol) was treated with H<sub>2</sub> (1 atm) in presence of 10% Pd/C (320 mg) at room temperature (16 h). The mixture was carefully filtered through a bed of Celite<sup>®</sup> and the filtrate was evaporated in vacuo to obtain a colorless oil: <sup>1</sup>H NMR (CDCl<sub>3</sub>)  $\delta$  1.60–1.65 (br s, NH<sub>2</sub>), 2.33 (s, PhCH<sub>3</sub>), 3.37 (s, OCH<sub>3</sub>), 3.56–3.67 (m, CH<sub>2</sub>, CH), 4.34–4.43 (m, NCH<sub>2</sub>), 7.10–7.79 (m, 4 ArH), 7.70–7.77 (br s, NHC(O)); <sup>13</sup>C NMR (CDCl<sub>3</sub>)  $\delta$  21.0 (PhCH<sub>3</sub>), 42.9 (CH<sub>2</sub>N), 54.8 (CH), 58.8 (OCH<sub>3</sub>), 74.5 (CH<sub>2</sub>), 127.6, 129.3, 135.3, 137.0 (4 ArC), 172.5 (C(O)).

## Supporting Information

The oil was dissolved in CH<sub>2</sub>Cl<sub>2</sub> (100 mL) and then triethylamine (1.5 mL, 10.8 mmol) and acetyl chloride (766  $\mu$ L, 10.8 mmol) were carefully added at 0 °C and the resulting solution was stirred at room temperature (2 h). An aqueous 10% citric acid solution (100 mL) was added and the organic layer was extracted with CH<sub>2</sub>Cl<sub>2</sub> (3 x 100 mL). The organic layers were combined, washed with a saturated NaHCO<sub>3</sub> solution (100 mL), dried (MgSO<sub>4</sub>), and concentrated in vacuo. After 2 recrystallizations from EtOAc, (*R*)-*N*-(4'-methyl)benzyl 2-acetamido-3-methoxypropionamide was obtained as a white solid (1.70 g, 72%):  $R_f = 0.50$  (EtOAc); mp 128–129 °C;  $[\alpha]_D^{25} -22.4^\circ$  ( $c$  1, CHCl<sub>3</sub>); IR (nujol) 3285, 3062, 1637, 1548, 1458, 1375, 1311, 1105, 915, 808, 724 cm<sup>-1</sup>; <sup>1</sup>H NMR (CDCl<sub>3</sub>)  $\delta$  1.98 (s, CH<sub>3</sub>CO), 2.32 (PhCH<sub>3</sub>), 3.35 (s, OCH<sub>3</sub>), 3.45 (dd,  $J = 6.9, 9.3$  Hz, CHH'), 3.75 (dd,  $J = 4.2, 9.3$  Hz, CHH'), 4.36–4.43 (m, CH<sub>2</sub>N), 4.57–4.62 (m, CH), 6.71 (br d,  $J = 6.9$  Hz, NHC(O)CH<sub>3</sub>), 6.98–7.04 (br t, CH<sub>2</sub>NH), 7.09–7.16 (m, 4 ArH), addition of excess (*R*)-(-)-mandelic acid to a CDCl<sub>3</sub> solution of (*R*)-*N*-(4'-methyl)benzyl 2-acetamido-3-methoxypropionamide gave only one signal for the acetyl methyl and one signal for the ether methyl protons; <sup>13</sup>C NMR (CDCl<sub>3</sub>)  $\delta$  21.0 (PhCH<sub>3</sub>), 23.1 (CH<sub>3</sub>CO), 43.3 (CH<sub>2</sub>N), 52.4 (CHCH<sub>2</sub>), 59.0 (OCH<sub>3</sub>), 71.7 (CH<sub>2</sub>OCH<sub>3</sub>), 127.4, 129.3, 134.8, 137.1 (4 ArC), 169.9, 170.3 (2 C(O)); HRMS (M+H<sup>+</sup>)(ESI<sup>+</sup>) 265.1552 [M + H<sup>+</sup>] (calcd for C<sub>14</sub>H<sub>20</sub>N<sub>2</sub>O<sub>3</sub>H<sup>+</sup> 265.1552); Anal. Calcd. for C<sub>14</sub>H<sub>20</sub>N<sub>2</sub>O<sub>3</sub>: C, 63.62; H, 7.63; N, 10.60. Found: C, 63.44; H, 7.68; N, 10.60.

## 6. Preparation of (*R*)- and (*S*)-*N*-(4'-Ethyl)benzyl 2-Acetamido-3-methoxypropionamide ((*R*)- and (*S*)-11).

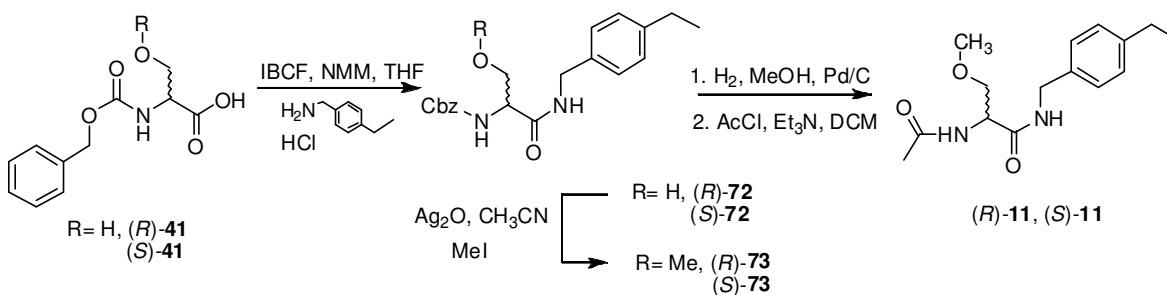

## Supporting Information

**Preparation of (*R*)-*N*-(4'-Ethyl)benzyl 2-*N*-(Benzyloxycarbonyl)amino-3-hydroxypropionamide ((*R*)-72).** A THF solution (200 mL) of (*R*)-Cbz-serine (6.00 g, 25.1 mmol) was stirred and cooled at -78 °C under Ar and then 4-methylmorpholine (NMM) (3.3 mL, 30.1 mmol) was added dropwise. After 2 min of stirring at this temperature, isobutylchloroformate (IBCF) (3.9 mL, 30.1 mmol) was added dropwise leading to the precipitation of a white solid, and the reaction was allowed to proceed for additional 2 min and then (4-ethyl)benzylamine (4.3 mL, 30.1 mmol) was added portionwise at -78 °C. The mixture was allowed to stir at room temperature (2 h), and then the white solid filtered and the organic layer concentrated in vacuo. The remaining solid was recrystallized with EtOAc to obtain (*R*)-*N*-(4'-ethyl)benzyl 2-*N*-(benzyloxycarbonyl)amino-3-hydroxypropionamide as a white solid (5.36 g, 60%):  $R_f = 0.40$ ; mp 169–170 °C;  $[\alpha]_D^{25} -3.2^\circ$  ( $c$  1.0, MeOH); IR (nujol) 3288, 3062, 1689, 1643  $\text{cm}^{-1}$ ;  $^1\text{H NMR}$  ( $\text{CD}_3\text{OD}$ )  $\delta$  1.20 (t,  $J = 7.8$  Hz,  $\text{CH}_2\text{CH}_3$ ), 2.60 (q,  $J = 7.8$  Hz,  $\text{CH}_2\text{CH}_3$ ), 3.79 (d,  $J = 5.4$  Hz,  $\text{NCH}_2$ ), 4.20–4.29 (m, CH), 4.30 (d,  $J = 3.0$  Hz,  $\text{CHH}'\text{OH}$ ), 4.39 (d,  $J = 3.0$  Hz,  $\text{CHH}'\text{OH}$ ), 5.10 (s,  $\text{ArCH}_2$ ), 7.10 (s,  $\text{C}_6\text{H}_4$ ), 7.20–7.40 (m,  $\text{C}_6\text{H}_5$ ); HRMS ( $\text{M}+\text{H}^+$ )( $\text{ESI}^+$ ) 357.1807 [ $\text{M} + \text{H}^+$ ] (calcd for  $\text{C}_{20}\text{H}_{24}\text{N}_2\text{O}_4\text{H}^+$  357.1814); Anal. Calcd. for  $\text{C}_{20}\text{H}_{24}\text{N}_2\text{O}_4$ : C, 67.40; H, 6.79; N, 7.86; Found: C, 67.31; H, 6.81; N, 7.88.

**Preparation of (*S*)-*N*-(4'-Ethyl)benzyl 2-*N*-(Benzyloxycarbonyl)amino-3-hydroxypropionamide ((*S*)-72).** A THF solution (200 mL) of (*S*)-Cbz-serine (6.00 g, 25.1 mmol) was stirred and cooled at -78 °C under Ar and then 4-methylmorpholine (NMM) (3.3 mL, 30.1 mmol) was added dropwise. After 2 min of stirring at this temperature, isobutylchloroformate (IBCF) (3.9 mL, 30.1 mmol) was added dropwise leading to the precipitation of a white solid, and the reaction was allowed to proceed for additional 2 min and then (4-ethyl)benzylamine (4.3 mL, 30.1 mmol) was added portionwise at -78 °C. The mixture was allowed to stir at room temperature (2 h), and then the white solid filtered and the organic layer concentrated in vacuo. The remaining solid was recrystallized with EtOAc to obtain (*S*)-*N*-(4'-ethyl)benzyl 2-*N*-(benzyloxycarbonyl)amino-3-hydroxypropionamide as a white solid (6.81 g, 65%):  $R_f = 0.35$  (5%

## Supporting Information

MeOH/CHCl<sub>3</sub>); mp 168–169 °C; [ $\alpha$ ]<sup>25</sup> +4.0° (c 1.0, MeOH); IR (nujol) 3288, 3061, 1689, 1643 cm<sup>-1</sup>; <sup>1</sup>H NMR (CD<sub>3</sub>OD)  $\delta$  1.56 (t,  $J$  = 7.2 Hz, CH<sub>2</sub>CH<sub>3</sub>), 2.94 (q,  $J$  = 7.2 Hz, CH<sub>2</sub>CH<sub>3</sub>), 3.62 (d,  $J$  = 1.5 Hz, NCH<sub>2</sub>), 4.08–4.11 (m, CH), 4.55 (d,  $J$  = 3.0 Hz, CHH'OH), 4.75 (d,  $J$  = 3.0 Hz, CHH'OH), 5.47 (s, ArCH<sub>2</sub>), 7.50–7.61 (m, C<sub>6</sub>H<sub>4</sub>), 7.62–7.76 (m, C<sub>6</sub>H<sub>5</sub>); HRMS (M+H<sup>+</sup>)(ESI<sup>+</sup>) 357.1806 [M + H<sup>+</sup>] (calcd for C<sub>20</sub>H<sub>24</sub>N<sub>2</sub>O<sub>4</sub>H<sup>+</sup> 357.1814); Anal. Calcd. for C<sub>20</sub>H<sub>24</sub>N<sub>2</sub>O<sub>4</sub>: C, 67.40; H, 6.79; N, 7.86; Found: C, 67.40; H, 6.78; N, 7.86.

**Preparation of (*R*)-*N*-(4'-Ethyl)benzyl 2-*N*-(Benzyloxycarbonyl)amino-3-methoxypropionamide ((*R*)-73).** Ag<sub>2</sub>O (12.95 g, 55.5 mmol) was added to a CH<sub>3</sub>CN solution (400 mL) of (*R*)-*N*-(4'-ethyl)benzyl 2-*N*-(benzyloxycarbonyl)amino-3-hydroxypropionamide (3.97 g, 11.1 mmol) and CH<sub>3</sub>I (6.9 mL, 111.1 mmol) at room temperature under Ar. The reaction mixture was stirred at room temperature in the dark (4 d), filtered through a pad of Celite<sup>®</sup>, and the filtrate concentrated in vacuo to obtain a white solid. The solid was purified by flash column chromatography on silica gel with EtOAc/hexanes (50/50) as the eluant to obtain (*R*)-*N*-(4'-ethyl)benzyl 2-*N*-(benzyloxycarbonyl)amino-3-methoxypropionamide as a white solid (2.83 g, 69%):  $R_f$  = 0.60 (5% MeOH/CHCl<sub>3</sub>); mp 114–115 °C ; IR (nujol) 3292, 3063, 1689, 1645 cm<sup>-1</sup>; <sup>1</sup>H NMR ( CDCl<sub>3</sub>)  $\delta$  1.22 (t,  $J$  = 7.5 Hz, CH<sub>2</sub>CH<sub>3</sub>), 2.62 (q,  $J$  = 7.5 Hz, CH<sub>2</sub>CH<sub>3</sub>), 3.34 (s, OCH<sub>3</sub>), 3.44 (dd,  $J$  = 2.9, 9.0 Hz, CHH'OCH<sub>3</sub>), 3.85 (dd,  $J$  = 2.9, 9.0 Hz, CHH'OCH<sub>3</sub>), 4.37–4.40 (m, CH), 4.42 (d,  $J$  = 5.4 Hz, NCH<sub>2</sub>), 5.09 (s, ArCH<sub>2</sub>), 6.65–6.75 (br t, NH), 7.11–7.21 (m, C<sub>6</sub>H<sub>4</sub>), 7.26–7.41 (m, C<sub>6</sub>H<sub>5</sub>); <sup>13</sup>C NMR (CDCl<sub>3</sub>)  $\delta$  15.6 (CH<sub>3</sub>), 28.5 (CH<sub>2</sub>CH<sub>3</sub>), 43.3 (CH<sub>2</sub>N), 54.5 (CHCH<sub>2</sub>), 59.0 (OCH<sub>3</sub>), 67.1 (PhCH<sub>2</sub>O), 72.0 (CH<sub>2</sub>OCH<sub>3</sub>), 127.5, 128.0, 128.1, 127.2, 128.5, 135.0, 136.1, 143.5 (8 ArC), 156.2 (NC(O)O), 169.7 (C(O)); HRMS (M+H<sup>+</sup>)(ESI<sup>+</sup>) 393.1783 [M + Na<sup>+</sup>] (calcd for C<sub>21</sub>H<sub>26</sub>N<sub>2</sub>O<sub>4</sub>Na<sup>+</sup> 393.1790); Anal. Calcd. for C<sub>21</sub>H<sub>26</sub>N<sub>2</sub>O<sub>4</sub>: C, 68.09; H, 7.07; N, 7.56; Found: C, 67.86; H, 7.10; N, 7.59.

## Supporting Information

**Preparation of (*S*)-*N*-(4'-Ethyl)benzyl 2-*N*-(Benzyloxycarbonyl)amino-3-methoxypropionamide ((*S*)-73).** Ag<sub>2</sub>O (12.95 g, 55.5 mmol) was added to a CH<sub>3</sub>CN solution (400 mL) of (*S*)-*N*-(4'-ethyl)benzyl 2-*N*-(benzyloxycarbonyl)amino-3-hydroxypropionamide (3.97 g, 11.1 mmol) and CH<sub>3</sub>I (6.9 mL, 111.1 mmol) at room temperature under Ar. The reaction mixture was stirred at room temperature in the dark (4 d), filtered through a pad of Celite<sup>®</sup>, and the filtrate concentrated in vacuo to obtain a white solid. The solid was purified by flash column chromatography on silica gel with EtOAc/hexanes (50/50) as the eluant to obtain (*S*)-*N*-(4'-ethyl)benzyl 2-*N*-(benzyloxycarbonyl)amino-3-methoxypropionamide as a white solid (3.95 g, 96%): *R*<sub>f</sub> = 0.60 (5% MeOH in CHCl<sub>3</sub>); mp 114–115 °C; IR (nujol) 3295, 3073, 1698, 1648 cm<sup>-1</sup>; <sup>1</sup>H NMR (300 MHz, CDCl<sub>3</sub>) δ 1.22 (t, *J* = 7.5 Hz, CH<sub>2</sub>CH<sub>3</sub>), 2.62 (q, *J* = 7.5 Hz, CH<sub>2</sub>CH<sub>3</sub>), 3.34 (s, OCH<sub>3</sub>), 3.44 (dd, *J* = 2.9, 9.0 Hz, CHH'OCH<sub>3</sub>), 3.85 (dd, *J* = 2.9, 9.0 Hz, CHH'OCH<sub>3</sub>), 4.37–4.40 (m, CH), 4.42 (d, *J* = 5.4 Hz, NCH<sub>2</sub>), 5.09 (s, ArCH<sub>2</sub>), 6.71 (br t, NH), 7.11–7.21 (m, C<sub>6</sub>H<sub>4</sub>), 7.26–7.41 (m, C<sub>6</sub>H<sub>5</sub>); HRMS (M+H<sup>+</sup>)(ESI<sup>+</sup>) 393.1783 [M + Na<sup>+</sup>] (calcd for C<sub>21</sub>H<sub>26</sub>N<sub>2</sub>O<sub>4</sub>Na<sup>+</sup> 393.1790); Anal. Calcd. for C<sub>21</sub>H<sub>26</sub>N<sub>2</sub>O<sub>4</sub>•0.05H<sub>2</sub>O: C, 67.91; H, 7.08; N, 7.54; Found: C, 67.66; H, 7.18; N, 7.59.

**Preparation of (*R*)-*N*-(4'-Ethyl)benzyl 2-Acetamido-3-methoxypropionamide ((*R*)-11).** A MeOH solution (250 mL) of (*R*)-*N*-(4'-ethyl)benzyl 2-*N*-(benzyloxycarbonyl)amino-3-methoxypropionamide (1.20 g, 3.0 mmol) was treated with H<sub>2</sub> (1 atm) in presence of 10% Pd/C (120 mg) at room temperature (3 d). The mixture was carefully filtered through a bed of Celite<sup>®</sup>. The pad was washed with MeOH and CH<sub>2</sub>Cl<sub>2</sub>, and the washings were collected and evaporated in vacuo to obtain a yellow solid. The residue was dissolved in CH<sub>2</sub>Cl<sub>2</sub> (40 mL) and then triethylamine (0.5 mL, 3.5 mmol) and acetyl chloride (250 μL, 3.5 mmol) were carefully added at 0 °C and the resulting solution was stirred at room temperature (2 h). An aqueous 10% citric acid solution (100 mL) was added and the organic layer was extracted with CH<sub>2</sub>Cl<sub>2</sub> (3 x 100 mL). The

## Supporting Information

organic layers were combined, washed with a saturated aqueous NaHCO<sub>3</sub> solution (100 mL), dried (MgSO<sub>4</sub>), and concentrated in vacuo. After recrystallization of the residue with EtOAc, (*R*)-*N*-(4'-ethyl)benzyl 2-acetamido-3-methoxypropionamide was obtained as a white solid: mp 132-133 °C; IR (nujol) 3413, 3305, 3057, 2968, 2932, 1693, 1528, 1266, 1116 cm<sup>-1</sup>; <sup>1</sup>H NMR (CDCl<sub>3</sub>) δ 1.22 (t, *J* = 7.5 Hz, CH<sub>3</sub>CH<sub>2</sub>), 2.02 (s, CH<sub>3</sub>CO), 2.63 (q, *J* = 7.5 Hz, CH<sub>3</sub>CH<sub>2</sub>), 3.37 (s, OCH<sub>3</sub>), 3.43 (dd, *J* = 7.2, 9.0 Hz, CHH'), 3.79 (dd, *J* = 4.2, 9.0 Hz, CHH'), 4.43 (d, *J* = 6.0 Hz, CH<sub>2</sub>N), 4.50–4.58 (m CH), 6.47 (br d, *J* = 6.9 Hz, NHC(O)CH<sub>3</sub>), 6.71–6.82 (br t, CH<sub>2</sub>NH), 7.15–7.18 (m, 4 ArH), addition of excess (*R*)-(-)-mandelic acid to a CDCl<sub>3</sub> solution of (*R*)-*N*-(4'-ethyl)benzyl 2-acetamido-3-methoxypropionamide gave only one signal for the acetyl methyl and one signal for the ether methyl protons; <sup>13</sup>C NMR (CDCl<sub>3</sub>) δ 15.5 (CH<sub>2</sub>CH<sub>3</sub>), 23.1 (CH<sub>3</sub>CO), 28.5 (CH<sub>2</sub>CH<sub>3</sub>), 43.3 (CH<sub>2</sub>N), 52.4 (CHCH<sub>2</sub>), 59.0 (OCH<sub>3</sub>), 71.7 (CH<sub>2</sub>OCH<sub>3</sub>), 127.5, 128.1, 135.0, 143.5 (4 ArC), 169.9, 170.3 (2 C(O)); HRMS (M+H<sup>+</sup>)(ESI<sup>+</sup>) 279.1708 [M + H<sup>+</sup>] (calcd for C<sub>15</sub>H<sub>22</sub>N<sub>2</sub>O<sub>3</sub><sup>+</sup> 279.1705); Anal. Calcd. for C<sub>15</sub>H<sub>22</sub>N<sub>2</sub>O<sub>3</sub>: C, 64.73; H, 7.97; N, 10.06. Found: C, 64.52; H, 7.98; N, 10.05.

**Preparation of (*S*)-*N*-(4'-Ethyl)benzyl 2-Acetamido-3-methoxypropionamide ((*S*)-11).** A MeOH solution (250 mL) of (*S*)-*N*-(4'-ethyl)benzyl 2-*N*-(benzyloxycarbonyl)amino-3-methoxypropionamide (1.20 g, 3.0 mmol) was treated with H<sub>2</sub> (1 atm) in presence of 10% Pd/C (120 mg) at room temperature (3 d). The mixture was carefully filtered through a bed of Celite<sup>®</sup>. The pad was washed with MeOH and CH<sub>2</sub>Cl<sub>2</sub>, and the washings were collected and evaporated in vacuo to obtain a yellow solid. The residue was dissolved in CH<sub>2</sub>Cl<sub>2</sub> (40 mL) and then triethylamine (0.5 mL, 3.5 mmol) and acetyl chloride (250 μL, 3.5 mmol) were carefully added at 0 °C and the resulting solution was stirred at room temperature (2 h). An aqueous 10% citric acid solution (100 mL) was added and the organic layer was extracted with CH<sub>2</sub>Cl<sub>2</sub> (3 x 100 mL). The organic layers were combined, washed with a saturated aqueous NaHCO<sub>3</sub> solution (100 mL), dried (MgSO<sub>4</sub>), and concentrated in vacuo. After recrystallization of the residue with EtOAc, (*S*)-*N*-(4'-ethyl)benzyl 2-acetamido-3-



## Supporting Information

methoxypropionamide was obtained as a white solid: mp 132–133 °C; IR (nujol) 3286, 2932, 2928, 1637, 1554, 1458, 1375, 1311, 1197, 1102, 1051, 909, 821, 724  $\text{cm}^{-1}$ ;  $^1\text{H}$  NMR ( $\text{CDCl}_3$ )  $\delta$  1.22 (t,  $J = 7.5$  Hz,  $\text{CH}_3\text{CH}_2$ ), 2.02 (s,  $\text{CH}_3\text{CO}$ ), 2.62 (q,  $J = 7.5$  Hz,  $\text{CH}_3\text{CH}_2$ ), 3.37 (s,  $\text{OCH}_3$ ), 3.43 (dd,  $J = 7.2, 9.0$  Hz,  $\text{CHH}'$ ), 3.79 (dd,  $J = 4.5, 9.0$  Hz,  $\text{CHH}'$ ), 4.43 (d,  $J = 5.7$  Hz,  $\text{CH}_2\text{N}$ ), 4.43–4.58 (m  $\text{CH}$ ), 6.48 (br d,  $J = 6.3$  Hz,  $\text{NHC(O)CH}_3$ ), 6.71–6.82 (br t,  $\text{CH}_2\text{NH}$ ), 7.15–7.18 (m, 4  $\text{ArH}$ ), addition of excess (*R*)-(-)-mandelic acid to a  $\text{CDCl}_3$  solution of (*S*)-*N*-(4'-ethyl)benzyl 2-acetamido-3-methoxypropionamide gave only one signal for the acetyl methyl and one signal for the ether methyl protons;  $^{13}\text{C}$  NMR ( $\text{CDCl}_3$ )  $\delta$  15.8 ( $\text{CH}_2\text{CH}_3$ ), 23.4 ( $\text{CH}_3\text{CO}$ ), 28.7 ( $\text{CH}_2\text{CH}_3$ ), 43.5 ( $\text{CH}_2\text{N}$ ), 52.6 ( $\text{CHCH}_2$ ), 59.3 ( $\text{OCH}_3$ ), 72.0 ( $\text{CH}_2\text{OCH}_3$ ), 127.7, 128.4, 135.2, 143.8 (4  $\text{ArC}$ ), 170.1, 170.5 (2  $\text{C(O)}$ ); HRMS ( $\text{M}+\text{H}^+$ )( $\text{ESI}^+$ ) 279.1708 [ $\text{M} + \text{H}^+$ ] (calcd for  $\text{C}_{15}\text{H}_{22}\text{N}_2\text{O}_3^+$  279.1705); Anal. Calcd. for  $\text{C}_{15}\text{H}_{22}\text{N}_2\text{O}_3$ : C, 64.73; H, 7.97; N, 10.06. Found: C, 64.73; H, 7.98; N, 10.04.

## 7. Preparation of (*R*)-*N*-(4'-Propyl)benzyl 2-Acetamido-3-methoxypropionamide ((*R*)-12).

**Preparation of (*R*)-*N*-(4'-Propyl)benzyl 2-Acetamido-3-methoxypropionamide ((*R*)-12).**  $\text{PtO}_2$  (100 mg) was added to an EtOH solution of (*R*)-*N*-(4'-(prop-1-ynyl))benzyl 2-acetamido-3-methoxypropionamide ((*R*)-24) (700 mg, 2.25 mmol), and the mixture was stirred at room temperature under  $\text{H}_2$  (1 atm) (24 h). The reaction mixture was filtered through a pad of Celite<sup>®</sup>, and the pad was washed successively with EtOH and  $\text{CH}_2\text{Cl}_2$ . The filtrate was concentrated under vacuum and the residue was purified by flash chromatography on silica gel with EtOAc/hexanes (8/2 to 10/0) as the eluant to obtain (*R*)-*N*-(4'-propyl)benzyl 2-acetamido-3-methoxypropionamide (560 mg, 79%) as a white solid:  $R_f = 0.37$  (EtOAc); mp 126–127 °C;  $[\alpha]_{\text{D}}^{25.4} = -27.2^\circ$  ( $c$  0.5,  $\text{CHCl}_3$ ); IR (nujol) 3439, 3374, 3140, 2949, 2859, 1637, 1548, 1457, 1374, 1305, 1137, 1098, 972, 832, 725  $\text{cm}^{-1}$ ;  $^1\text{H}$  NMR ( $\text{CDCl}_3$ )  $\delta$  0.93 (t,  $J = 7.5$  Hz,  $\text{CH}_3\text{CH}_2$ ),

## Supporting Information

1.57–1.64 (m, CH<sub>2</sub>CH<sub>2</sub>CH<sub>3</sub>), 2.04 (s, CH<sub>3</sub>C(O)), 2.57 (t, *J* = 7.8 Hz, CH<sub>2</sub>CH<sub>2</sub>CH<sub>3</sub>), 3.34–3.45 (m, CHH', OCH<sub>3</sub>), 3.81 (dd, *J* = 4.2, 9.0 Hz, CHH'), 4.44 (d, *J* = 5.7 Hz, CH<sub>2</sub>N), 4.50–4.57 (m, NC(H)CO), 6.38–6.46 (br m, CHNH), 6.63–6.73 (br m, CH<sub>2</sub>NH), 7.12–7.19 (m, 4 ArH), addition of excess (*R*)-(–)-mandelic acid to a CDCl<sub>3</sub> solution of (*R*)-*N*-(4'-propyl)benzyl 2-acetamido-3-methoxypropionamide gave only one signal for the acetyl methyl and one signal for the ether methyl protons; <sup>13</sup>C NMR (CDCl<sub>3</sub>) δ 13.8 (CH<sub>2</sub>CH<sub>3</sub>), 23.1 (CH<sub>3</sub>CO), 24.5 (CH<sub>2</sub>CH<sub>3</sub>), 37.6 (CH<sub>2</sub>CH<sub>2</sub>CH<sub>3</sub>), 43.3 (CH<sub>2</sub>N), 52.4 (CHCH<sub>2</sub>), 59.0 (OCH<sub>3</sub>), 71.8 (CH<sub>2</sub>OCH<sub>3</sub>), 123.4, 128.7, 135.0, 142.0 (4 ArC), 169.9, 170.3 (2 C(O)); HRMS (M+H<sup>+</sup>)(ESI<sup>+</sup>) 293.1865 [M + H<sup>+</sup>] (calcd for C<sub>16</sub>H<sub>24</sub>N<sub>2</sub>O<sub>3</sub>H<sup>+</sup> 293.1865); Anal. Calcd. for C<sub>16</sub>H<sub>24</sub>N<sub>2</sub>O<sub>3</sub>: C, 65.73; H, 8.27; N, 9.58. Found: C, 66.01; H, 8.24; N, 9.36.

### 8. Preparation of (*R*)-*N*-(4'-*iso*-Propyl)benzyl 2-Acetamido-3-methoxypropionamide ((*R*)-13).

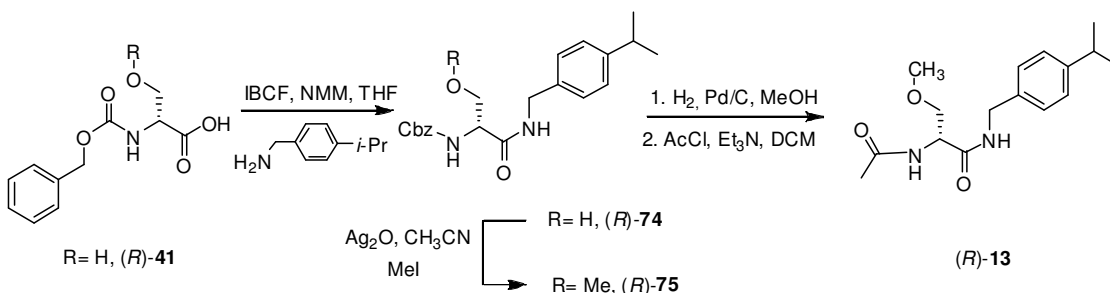

#### Preparation of (*R*)-*N*-(4'-*iso*-Propyl)benzyl 2-*N*-

(Benzyloxycarbonyl)amino-3-hydroxypropionamide ((*R*)-74). A THF solution (200 mL) of (*R*)-Cbz-serine (5.00 g, 20.9 mmol) was stirred and cooled at -78 °C under Ar and then 4-methylmorpholine (NMM) (2.8 mL, 25.1 mmol) was added dropwise. After 2 min of stirring at this temperature, isobutylchloroformate (IBCF) (3.3 mL, 25.1 mmol) was added dropwise leading to the precipitation of a white solid, and the reaction was allowed to proceed for an additional 2 min. A THF (40 mL) suspension of 4-*iso*-propylbenzylamine hydrochloride (5.42 g, 29.3 mmol)

## Supporting Information

and NMM (2.8 mL, 25.1 mmol), were added portionwise at -78 °C. The mixture was allowed to stir at room temperature (2 h), and then the white solid filtered and the organic layer concentrated in vacuo. The residue was purified by flash column chromatography on silica gel with EtOAc/hexanes (30/70 to 100/0) as the eluant to obtain (*R*)-*N*-(4'-*iso*-propyl)benzyl 2-*N*-(benzyloxycarbonyl)amino-3-hydroxypropionamide as a white solid (2.40 g, 31%):  $R_f = 0.75$  (EtOAc); mp 151–152 °C;  $[\alpha]^{24.7}_D +20.8^\circ$  (*c* 0.5, CHCl<sub>3</sub>); IR (nujol) 3289, 3099, 2952, 2861, 1690, 1643, 1537, 1458, 1375, 1313, 1240, 1025, 738, 698 cm<sup>-1</sup>; <sup>1</sup>H NMR (CDCl<sub>3</sub>)  $\delta$  1.23 (d,  $J = 6.9$  Hz, CH(CH<sub>3</sub>)<sub>2</sub>), 2.88 (sept.,  $J = 6.9$  Hz, CH(CH<sub>3</sub>)<sub>2</sub>), 3.12–3.24 (br s, OH), 3.61–3.72 (m, CHH'), 4.10 (dd,  $J = 2.4, 11.1$  Hz, CHH'), 4.21–4.27 (br m, CH), 4.39 (d,  $J = 5.4$  Hz, CH<sub>2</sub>N), 5.08 (s, CH<sub>2</sub>O), 5.90 (br d,  $J = 7.5$  Hz, NH), 6.89–7.00 (br s, NH), 7.16 (s, 4 ArH), 7.33 (s, 5 ArH); <sup>13</sup>C NMR (CDCl<sub>3</sub>)  $\delta$  23.9(CH(CH<sub>3</sub>)<sub>2</sub>), 33.8 (CH(CH<sub>3</sub>)<sub>2</sub>), 43.3 (NCH<sub>2</sub>), 55.3 (OCH<sub>2</sub>CH), 62.8 (OCH<sub>2</sub>CH), 67.4 (PhCH<sub>2</sub>O), 126.8, 127.6, 128.1, 128.3, 128.6, 134.8, 135.9, 148.3 (8 ArC), 156.7 (NC(O)O), 170.7 (C(O)); HRMS (M+H<sup>+</sup>)(ESI<sup>+</sup>) 371.1971 [M + H<sup>+</sup>] (calcd for C<sub>21</sub>H<sub>26</sub>N<sub>2</sub>O<sub>4</sub>H<sup>+</sup> 371.1971); Anal. Calcd. for C<sub>21</sub>H<sub>26</sub>N<sub>2</sub>O<sub>4</sub>: C, 68.09; H, 7.07; N, 7.56. Found: C, 67.82; H, 6.98; N, 7.47.

**Preparation of (*R*)-*N*-(4'-*iso*-Propyl)benzyl 2-*N*-(Benzyloxycarbonyl)amino-3-methoxypropionamide ((*R*)-75).** Ag<sub>2</sub>O (6.00 g, 25.7 mmol) was added to a CH<sub>3</sub>CN solution (100 mL) of (*R*)-*N*-(4'-*iso*-propyl)benzyl 2-*N*-(benzyloxycarbonyl)amino-3-hydroxypropionamide (1.90 g, 5.1 mmol) and CH<sub>3</sub>I (3.2 mL, 51.0 mmol) at room temperature under Ar. The reaction mixture was stirred at room temperature in the dark (3 d), filtered through a pad of Celite<sup>®</sup>, and the filtrate concentrated in vacuo to obtain (*R*)-*N*-(4'-*iso*-propyl)benzyl 2-*N*-(benzyloxycarbonyl)amino-3-hydroxypropionamide as a white solid (1.90 g, quant.):  $R_f = 0.66$  (EtOAc); mp 79–81 °C;  $[\alpha]^{26.8}_D -25.2^\circ$  (*c* 0.5, CHCl<sub>3</sub>); IR (nujol) 3275, 2888, 1690, 1645, 1548, 1458, 1374, 1315, 1255, 1156, 1091, 1044, 972, 919, 808, 727 cm<sup>-1</sup>; <sup>1</sup>H NMR (CDCl<sub>3</sub>)  $\delta$  1.23 (d,  $J = 6.9$  Hz, CH(CH<sub>3</sub>)<sub>2</sub>), 2.89 (sept.  $J = 6.9$  Hz, CH(CH<sub>3</sub>)<sub>2</sub>), 3.35 (s, OCH<sub>3</sub>), 3.49 (dd,  $J = 6.3, 9.2$  Hz, CHH'), 3.85 (dd,  $J = 3.6, 9.2$  Hz, CHH'), 4.29–4.38 (br m, CHCH<sub>2</sub>), 4.43

## Supporting Information

(d,  $J = 5.7$  Hz,  $\text{CH}_2\text{N}$ ), 5.11 (s,  $\text{OCH}_2$ ), 5.62–5.76 (br d,  $\text{OC(O)NH}$ ), 6.61–6.75 (br m,  $\text{CH}_2\text{NH}$ ), 7.18 (s, 4 ArH), 7.34 (s, 5 ArH);  $^{13}\text{C}$  NMR ( $\text{CDCl}_3$ )  $\delta$  23.9 ( $\text{CH}(\text{CH}_3)_2$ ), 33.8 ( $\text{CH}(\text{CH}_3)_2$ ), 43.3 ( $\text{NCH}_2$ ), 54.3 ( $\text{OCH}_2\text{CH}$ ), 59.1 ( $\text{OCH}_3$ ), 67.2 ( $\text{PhCH}_2\text{O}$ ), 72.0 ( $\text{OCH}_2\text{CH}$ ), 126.7, 127.5, 128.1, 128.2, 128.5, 135.1, 136.0, 148.2 (8 ArC), 156.1 ( $\text{NC(O)O}$ ), 169.8 ( $\text{C(O)}$ ); HRMS ( $\text{M}+\text{H}^+$ )(ESI $^+$ ) 385.2128 [ $\text{M} + \text{H}^+$ ] (calcd for  $\text{C}_{22}\text{H}_{28}\text{N}_2\text{O}_4\text{H}^+$  385.2127); Anal. Calcd. for  $\text{C}_{22}\text{H}_{28}\text{N}_2\text{O}_4$ : C, 68.73; H, 7.34; N, 7.29. Found: C, 68.71; H, 7.40; N, 7.29.

**Preparation of (*R*)-*N*-(4'-*iso*-Propyl)benzyl 2-Acetamido-3-methoxypropionamide ((*R*)-13).** An EtOH solution (250 mL) of (*R*)-*N*-(4'-*iso*-propyl)benzyl 2-*N*-(benzyloxycarbonyl)amino-3-methoxypropionamide (1.80 g, 4.7 mmol) was treated with  $\text{H}_2$  (1 atm) in presence of 10% Pd/C (180 mg) at room temperature (16 h). The mixture was carefully filtered through a bed of Celite $^{\text{®}}$  and the filtrate was evaporated in vacuo to obtain a brown oil:  $^1\text{H}$  NMR ( $\text{CDCl}_3$ )  $\delta$  1.24 (d,  $J = 6.9$  Hz,  $\text{CH}(\text{CH}_3)_2$ ), 2.89 (sept.,  $J = 6.9$  Hz,  $\text{CH}(\text{CH}_3)_2$ ), 3.38 (s,  $\text{OCH}_3$ ), 3.59–3.66 (m,  $\text{CH}_2$ ,  $\text{CH}$ ), 4.35–4.49 (m,  $\text{NCH}_2$ ), 7.16 (m, 4 ArH), 7.69–7.82 (br s,  $\text{NHC(O)}$ );  $^{13}\text{C}$  NMR ( $\text{CDCl}_3$ )  $\delta$  23.9 ( $\text{CH}(\text{CH}_3)_2$ ), 33.8 ( $\text{CH}(\text{CH}_3)_2$ ), 42.9 ( $\text{CH}_2\text{N}$ ), 54.8 ( $\text{CH}$ ), 58.8 ( $\text{OCH}_3$ ), 74.5 ( $\text{CH}_2$ ), 126.7, 127.7, 135.6, 148.1 (4 ArC), 172.5 ( $\text{C(O)}$ ).

The oil was dissolved in  $\text{CH}_2\text{Cl}_2$  (50 mL) and then triethylamine (0.79 mL, 5.6 mmol) and acetyl chloride (0.40 mL, 5.6 mmol) were carefully added at 0 °C and the resulting solution was stirred at room temperature (2 h). An aqueous 10% citric acid solution (50 mL) was added and the organic layer was extracted with  $\text{CH}_2\text{Cl}_2$  (3 x 50 mL). The organic layers were combined, washed with a saturated  $\text{NaHCO}_3$  solution (50 mL), dried ( $\text{MgSO}_4$ ), and concentrated in vacuo. The residue was purified by flash column chromatography on silica gel with EtOAc/hexanes (80/20 to 100/0) as the eluant to obtain (*R*)-*N*-(4'-*iso*-propyl)benzyl 2-acetamido-3-methoxypropionamide as a white solid (2.40 g, 62%):  $R_f = 0.39$  (EtOAc/hexanes 80/20); mp 95–97 °C;  $[\alpha]_D^{27.0} -10.5^\circ$  ( $c$  0.5,  $\text{CHCl}_3$ ); IR (nujol) 3289, 2921, 2858, 1635, 1550, 1457, 1376, 1312, 1193, 1101, 1048, 913, 811, 723  $\text{cm}^{-1}$ ;  $^1\text{H}$  NMR ( $\text{CDCl}_3$ )  $\delta$  1.24 (d,  $J = 6.9$  Hz,  $\text{CH}(\text{CH}_3)_2$ ), 2.03

## Supporting Information

(s, CH<sub>3</sub>CO), 2.90 (sept.,  $J = 6.9$  Hz, CH(CH<sub>3</sub>)<sub>2</sub>), 3.38 (s, OCH<sub>3</sub>), 3.43 (dd,  $J = 7.8, 9.0$  Hz, CHH'), 3.81 (dd,  $J = 4.2, 9.0$  Hz, CHH'), 4.44 (d,  $J = 5.7$  Hz, CH<sub>2</sub>N), 4.50–4.56 (m, CH), 6.44 (br d,  $J = 6.3$  Hz, NHC(O)CH<sub>3</sub>), 6.65–6.74 (br t, CH<sub>2</sub>NH), 7.19 (s, 4 ArH), addition of excess (*R*)-(-)-mandelic acid to a CDCl<sub>3</sub> solution of (*R*)-*N*-(4'-*iso*-propyl)benzyl 2-acetamido-3-methoxypropionamide gave only one signal for the acetyl methyl and one signal for the ether methyl protons; <sup>13</sup>C NMR (CDCl<sub>3</sub>) δ 23.2 (CH<sub>3</sub>CO), 24.0 (CH(CH<sub>3</sub>)<sub>2</sub>), 33.8 (CH(CH<sub>3</sub>)<sub>2</sub>), 43.3 (CH<sub>2</sub>N), 52.4 (CHCH<sub>2</sub>), 59.0 (OCH<sub>3</sub>), 71.7 (CH<sub>2</sub>OCH<sub>3</sub>), 126.7, 127.5, 135.1, 148.2 (4 ArC), 169.9, 170.3 (2 C(O)); MS (M+Na<sup>+</sup>)(ESI<sup>+</sup>) 315.2 [M + H<sup>+</sup>] (calcd for C<sub>16</sub>H<sub>22</sub>N<sub>2</sub>O<sub>3</sub>Na<sup>+</sup> 315.2); Anal. Calcd. for C<sub>16</sub>H<sub>22</sub>N<sub>2</sub>O<sub>3</sub>: C, 65.73; H, 8.27; N, 9.58. Found: C, 65.46; H, 8.21; N, 9.48.

### 9. Preparation of (*R*)-*N*-(4'-*tert*-Butyl)benzyl 2-Acetamido-3-methoxypropionamide ((*R*)-14).

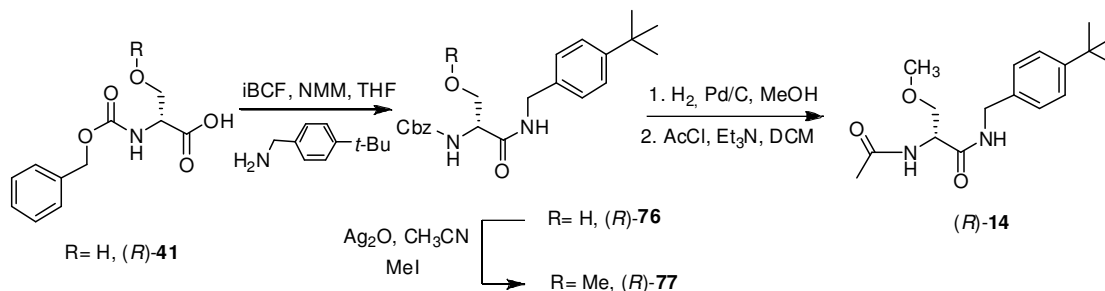

**Preparation of (*R*)-*N*-(4'-*tert*-Butyl)benzyl 2-*N*-(Benzyloxycarbonyl)amino-3-hydroxypropionamide ((*R*)-76).** A THF solution (200 mL) of (*R*)-Cbz-serine (6.10 g, 25.5 mmol) was stirred and cooled at -78 °C under Ar and then 4-methylmorpholine (NMM) (3.4 mL, 30.6 mmol) was added dropwise. After 2 min of stirring at this temperature, isobutylchloroformate (IBCF) (4.0 mL, 30.6 mmol) was added dropwise leading to the precipitation of a white solid, and the reaction was allowed to proceed for additional 2 min and then 4-*tert*-butylbenzylamine (5.00 g, 30.6 mmol) was added portionwise at -78 °C. The

## Supporting Information

mixture was allowed to stir at room temperature (2 h), and then the white solid filtered and the organic layer concentrated in vacuo. The residue was recrystallized with EtOAc to obtain (*R*)-*N*-(4'-*tert*-butyl)benzyl 2-*N*-(benzyloxycarbonyl)amino-3-hydroxypropionamide as a white solid (6.10 g, 62%):  $R_f = 0.15$  (hexanes/EtOAc 5/5); mp 137–139 °C;  $[\alpha]^{26.0}_D +16.8^\circ$  ( $c$  1.0, CHCl<sub>3</sub>); IR (nujol) 3239, 3062, 2861, 1681, 1569, 1457, 1374, 1290, 1061, 798, 737 cm<sup>-1</sup>; <sup>1</sup>H NMR (CDCl<sub>3</sub>)  $\delta$  1.28 (s, C(CH<sub>3</sub>)<sub>3</sub>), 3.42–3.56 (br s, OH), 3.61–3.72 (m, CHH'), 3.99–4.08 (m, CHH'), 4.23–4.31 (br m, CH), 4.37 (d,  $J = 5.7$  Hz, CH<sub>2</sub>N), 5.05 (s, CH<sub>2</sub>O), 6.01 (d,  $J = 6.9$  Hz, NH), 7.01–7.10 (br s, NH), 7.15 (d,  $J = 8.1$  Hz, 2 ArH), 7.31 (s, 7 ArH); <sup>13</sup>C NMR (CDCl<sub>3</sub>)  $\delta$  31.3(C(CH<sub>3</sub>)<sub>3</sub>), 34.4 (C(CH<sub>3</sub>)<sub>3</sub>), 43.2 (NCH<sub>2</sub>), 55.3 (OCH<sub>2</sub>CH), 62.8 (OCH<sub>2</sub>CH), 67.3 (PhCH<sub>2</sub>O), 125.6, 127.2, 128.0, 128.5, 134.4, 135.9, 150.5 (7 ArC), 156.7 (NC(O)O), 170.7 (C(O)), one signal was not detected and is believed to overlap with nearby peaks; HRMS (M+H<sup>+</sup>)(ESI<sup>+</sup>) 385.2128 [M + H<sup>+</sup>] (calcd for C<sub>22</sub>H<sub>28</sub>N<sub>2</sub>O<sub>4</sub>H<sup>+</sup> 385.2127); Anal. Calcd. for C<sub>22</sub>H<sub>28</sub>N<sub>2</sub>O<sub>4</sub>: C, 68.73; H, 7.34; N, 7.29. Found: C, 68.60; H, 7.36; N, 7.26.

**Preparation of (*R*)-*N*-(4'-*tert*-Butyl)benzyl 2-*N*-(Benzyloxycarbonyl)amino-3-methoxypropionamide ((*R*)-77).** Ag<sub>2</sub>O (13.64 g, 58.5 mmol) was added to a CH<sub>3</sub>CN solution (300 mL) of (*R*)-*N*-(4'-*tert*-butyl)benzyl 2-*N*-(benzyloxycarbonyl)amino-3-hydroxypropionamide (4.50 g, 11.7 mmol) and CH<sub>3</sub>I (7.3 mL, 117.0 mmol) at room temperature under Ar. The reaction mixture was stirred at room temperature in the dark (2 d), filtered through a pad of Celite<sup>®</sup>, and the filtrate concentrated in vacuo to obtain a white solid. The solid was purified by flash column chromatography on silica gel with EtOAc/hexanes (0/100 to 50/50) as the eluant to obtain (*R*)-*N*-(4'-*tert*-butyl)benzyl 2-*N*-(benzyloxycarbonyl)amino-3-methoxypropionamide as a white solid (4.40 g, 97%):  $R_f = 0.59$  (1/1 EtOAc/hexanes); mp 74–76 °C;  $[\alpha]^{26.0}_D -25.6^\circ$  ( $c$  1.0, CHCl<sub>3</sub>); IR (nujol) 3291, 2958, 2860, 1687, 1645, 1533, 1458, 1374, 1314, 1243, 969, 730 cm<sup>-1</sup>; <sup>1</sup>H NMR (CDCl<sub>3</sub>)  $\delta$  1.31 (s, C(CH<sub>3</sub>)<sub>3</sub>), 3.36 (s, OCH<sub>3</sub>), 3.50 (dd,  $J = 6.6, 9.0$  Hz, CHH'), 3.85 (dd,  $J = 3.3, 9.0$  Hz, CHH'), 4.31–4.38 (br m, CHCH<sub>2</sub>), 4.44 (d,  $J = 5.7$  Hz, CH<sub>2</sub>N), 5.11 (s, OCH<sub>2</sub>), 5.70–5.80 (br m,

## Supporting Information

OC(O)NH), 6.69–6.80 (br m, CH<sub>2</sub>NH), 7.19 (d,  $J = 7.5$  Hz, 2 ArH), 7.34 (s, 7 ArH); <sup>13</sup>C NMR (CDCl<sub>3</sub>)  $\delta$  31.0 (C(CH<sub>3</sub>)<sub>3</sub>), 34.4 (C(CH<sub>3</sub>)<sub>3</sub>), 43.2 (NCH<sub>2</sub>), 54.3 (OCH<sub>2</sub>CH), 59.0 (OCH<sub>3</sub>), 67.1 (PhCH<sub>2</sub>O), 72.0 (OCH<sub>2</sub>CH), 125.5, 127.2, 128.1, 128.2, 128.5, 134.7, 136.0, 150.4 (8 ArC), 156.1 (NC(O)O), 169.8 (C(O)); HRMS (M+H<sup>+</sup>)(ESI<sup>+</sup>) 399.2284 [M + H<sup>+</sup>] (calcd for C<sub>23</sub>H<sub>30</sub>N<sub>2</sub>O<sub>4</sub>H<sup>+</sup> 399.2284); Anal. Calcd. for C<sub>23</sub>H<sub>30</sub>N<sub>2</sub>O<sub>4</sub>: C, 69.32; H, 7.59; N, 7.03. Found: C, 69.15; H, 7.64; N, 7.03.

**Preparation of (*R*)-*N*-(4'-*tert*-Butyl)benzyl 2-Acetamido-3-methoxypropionamide ((*R*)-14).** An EtOH solution (250 mL) of (*R*)-*N*-(4'-*tert*-butyl)benzyl 2-*N*-(benzyloxycarbonyl)amino-3-methoxypropionamide. (4.00 g, 10.0 mmol) was treated with H<sub>2</sub> (1 atm) in presence of 10% Pd/C (400 mg) at room temperature (16 h). The mixture was carefully filtered through a bed of Celite<sup>®</sup> and the filtrate was evaporated in vacuo to obtain a brown oil: <sup>1</sup>H NMR (CDCl<sub>3</sub>)  $\delta$  1.31 (s, C(CH<sub>3</sub>)<sub>3</sub>), 1.58–1.62 (br s, NH<sub>2</sub>), 3.38 (s, OCH<sub>3</sub>), 3.59–3.66 (m, CH<sub>2</sub>, CH), 4.36–4.49 (m, NCH<sub>2</sub>), 7.21 (d,  $J = 8.4$  Hz, 2 ArH), 7.36 (d,  $J = 8.4$  Hz, 2 ArH), 7.69–7.81 (br s, NHC(O)); <sup>13</sup>C NMR (CDCl<sub>3</sub>)  $\delta$  31.3 (C(CH<sub>3</sub>)<sub>3</sub>), 34.5 (C(CH<sub>3</sub>)<sub>3</sub>), 42.8 (CH<sub>2</sub>N), 54.9 (CH), 58.8 (OCH<sub>3</sub>), 74.5 (CH<sub>2</sub>), 125.5, 127.4, 135.2, 150.3 (4 ArC), 172.5 (C(O)); HRMS (M+H<sup>+</sup>)(ESI<sup>+</sup>) 265.1916 [M + H<sup>+</sup>] (calcd for C<sub>15</sub>H<sub>24</sub>N<sub>2</sub>O<sub>2</sub>H<sup>+</sup> 265.1916).

The oil was dissolved in CH<sub>2</sub>Cl<sub>2</sub> (100 mL) and then triethylamine (1.7 mL, 12.0 mmol) and acetyl chloride (856  $\mu$ L, 12.0 mmol) were carefully added at 0 °C and the resulting solution was stirred at room temperature (2 h). An aqueous 10% citric acid solution (100 mL) was added and the organic layer was extracted with CH<sub>2</sub>Cl<sub>2</sub> (3 x 100 mL). The organic layers were combined, washed with a saturated NaHCO<sub>3</sub> solution (100 mL), dried (MgSO<sub>4</sub>), and concentrated in vacuo. After recrystallization of the residue with EtOAc (*R*)-*N*-(4'-*tert*-butyl)benzyl 2-acetamido-3-methoxypropionamide was obtained as a white solid (1.70 g, 55%):  $R_f = 0.73$  (EtOAc); mp 125–126 °C;  $[\alpha]^{26.8}_D -26.0^\circ$  ( $c$  1, CHCl<sub>3</sub>); IR (nujol) 3280, 2920, 2860, 1636, 1544, 1456, 1374, 1301, 1247, 1197, 1119, 966, 815, 725 cm<sup>-1</sup>; <sup>1</sup>H NMR (CDCl<sub>3</sub>)  $\delta$  1.30 (s, C(CH<sub>3</sub>)<sub>3</sub>), 1.99 (s, CH<sub>3</sub>CO), 3.37 (s, OCH<sub>3</sub>), 3.46 (dd,  $J = 7.2, 9.0$  Hz, CHH'), 3.77 (dd,  $J = 4.2, 9.0$  Hz, CHH'), 4.36–4.44 (m,

## Supporting Information

$\text{CH}_2\text{N}$ ), 4.56–4.62 (m,  $\text{CH}$ ), 6.63 (br d,  $J = 6.6$  Hz,  $\text{NHC(O)CH}_3$ ), 6.89–6.98 (br t,  $\text{CH}_2\text{NH}$ ), 7.18 (d,  $J = 8.1$  Hz, 2  $\text{ArH}$ ), 7.35 (d,  $J = 8.1$  Hz, 2  $\text{ArH}$ ), addition of excess (*R*)-(-)-mandelic acid to a  $\text{CDCl}_3$  solution of (*R*)-*N*-(4'-*tert*-butyl)benzyl 2-acetamido-3-methoxypropionamide gave only one signal for the acetyl methyl and one signal for the ether methyl protons;  $^{13}\text{C}$  NMR ( $\text{CDCl}_3$ )  $\delta$  23.1 ( $\text{CH}_3\text{CO}$ ), 31.3 ( $\text{C}(\text{CH}_3)_3$ ), 34.4 ( $\text{C}(\text{CH}_3)_3$ ), 43.2 ( $\text{CH}_2\text{N}$ ), 52.4 ( $\text{CHCH}_2$ ), 59.0 ( $\text{OCH}_3$ ), 71.8 ( $\text{CH}_2\text{OCH}_3$ ), 125.5, 127.2, 134.7, 150.4 (4  $\text{ArC}$ ), 169.9, 170.3 (2  $\text{C(O)}$ ); HRMS ( $\text{M}+\text{H}^+$ )( $\text{ESI}^+$ ) 307.2022 [ $\text{M} + \text{H}^+$ ] (calcd for  $\text{C}_{17}\text{H}_{26}\text{N}_2\text{O}_3\text{H}^+$  307.2021); Anal. Calcd. for  $\text{C}_{17}\text{H}_{26}\text{N}_2\text{O}_3$ : C, 66.64; H, 8.55; N, 9.14. Found: C, 66.61; H, 8.49; N, 9.09.

### 10. Preparation of (*R*)-*N*-(4'-(Aminomethyl))benzyl 2-Acetamido-3-methoxypropionamide Hydrochloride ((*R*)-15).

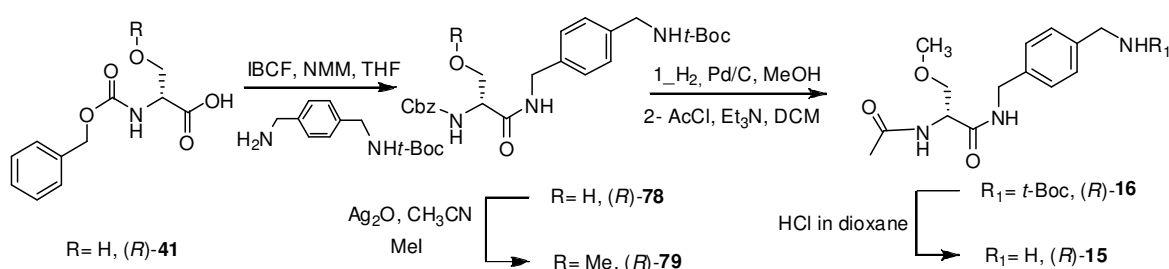

**Preparation of (*R*)-*N*-(4'-(*tert*-Butoxycarbonyl)aminomethyl)benzyl 2-*N*-(Benzyloxycarbonyl)amino-3-hydroxypropionamide ((*R*)-78).** A THF solution (200 mL) of (*R*)-Cbz-serine (7.00 g, 29.3 mmol) was stirred and cooled at  $-78$  °C under Ar and then 4-methylmorpholine (NMM) (3.9 mL, 35.1 mmol) was added dropwise. After 2 min of stirring at this temperature, isobutylchloroformate (IBCF) (4.6 mL, 35.1 mmol) was added dropwise leading to the precipitation of a white solid, and the reaction was allowed to proceed for additional 2 min and then 1-(*N*-Boc-aminomethyl)-4-(aminomethyl)benzene



## Supporting Information

(8.30 g, 35.1 mmol) was added portionwise at -78 °C. The mixture was allowed to stir at room temperature (2 h), and then the white solid filtered and the organic layer concentrated in vacuo. The residue was recrystallized with EtOAc to obtain (*R*)-*N*-(4'-(*tert*-butoxycarbonyl)aminomethyl)benzyl 2-*N*-(benzyloxycarbonyl)amino-3-hydroxypropionamide as a white solid (5.10 g), and the filtrate was purified by flash column chromatography on silica gel with EtOAc/hexanes (50/50) as the eluant to obtain (*R*)-*N*-(4'-(*tert*-butoxycarbonyl)aminomethyl)benzyl 2-*N*-(benzyloxycarbonyl)amino-3-hydroxypropionamide as a white solid (2.40 g) (total yield: 7.50 g (56%)):  $R_f = 0.16$  (hexanes/EtOAc 5/5); mp 150–151 °C;  $[\alpha]^{26.9}_D +8.7^\circ$  ( $c$  1.0, CHCl<sub>3</sub>); IR (nujol) 3320, 3099, 2953, 2916, 1689, 1648, 1534, 1456, 1366, 1282, 1241, 1173, 1027, 926, 863, 741, 664 cm<sup>-1</sup>; <sup>1</sup>H NMR (DMSO-*d*<sub>6</sub>)  $\delta$  1.38 (s, C(CH<sub>3</sub>)<sub>3</sub>), 3.52–3.66 (m, CH<sub>2</sub>OH), 4.05–4.11 (m, CH<sub>2</sub>NH, CH), 4.26 (d,  $J = 5.4$  Hz, CH<sub>2</sub>N), 4.89 (t,  $J = 5.7$  Hz, OH), 5.04 (s, CH<sub>2</sub>O), 7.13–7.24 (m, NH, 4 ArH), 7.31–7.38 (m, NH, 5 ArH), 8.39 (t,  $J = 5.7$  Hz, CH<sub>2</sub>NH); <sup>13</sup>C NMR (DMSO-*d*<sub>6</sub>)  $\delta$  28.2 (C(CH<sub>3</sub>)<sub>3</sub>), 41.8, 43.0 (2 NCH<sub>2</sub>), 57.3 (OCH<sub>2</sub>CH), 61.7 (OCH<sub>2</sub>CH), 65.4 (PhCH<sub>2</sub>O), 77.6 (C(CH<sub>3</sub>)<sub>3</sub>), 126.7, 126.8, 127.6, 127.7, 128.3, 136.9, 137.6, 138.5 (8 ArC), 155.7, 155.7 (2 NC(O)O), 170.0 (C(O)); HRMS (M+H<sup>+</sup>)(ESI<sup>+</sup>) 458.2291 [M + H<sup>+</sup>] (calcd for C<sub>24</sub>H<sub>31</sub>N<sub>3</sub>O<sub>6</sub>H<sup>+</sup> 458.2291); Anal. Calcd. for C<sub>24</sub>H<sub>31</sub>N<sub>3</sub>O<sub>6</sub>: C, 63.00; H, 6.83; N, 9.18. Found: C, 62.99; H, 6.70; N, 9.16.

**Preparation of (*R*)-*N*-(4'-(*tert*-Butoxycarbonyl)aminomethyl)benzyl 2-*N*-(Benzyloxycarbonyl)amino-3-methoxypropionamide ((*R*)-79).** Ag<sub>2</sub>O (15.30 g, 65.6 mmol) was added to a CH<sub>3</sub>CN solution (250 mL) of (*R*)-*N*-(4-(*tert*-butoxycarbonyl)aminomethyl)benzyl 2-*N*-(benzyloxycarbonyl)amino-3-hydroxypropionamide (6.00 g, 13.1 mmol) and CH<sub>3</sub>I (8.2 mL, 131.0 mmol) at room temperature under Ar. The reaction mixture was stirred at room temperature in the dark (5 d), filtered through a pad of Celite<sup>®</sup>, and the filtrate concentrated in vacuo. The solid was purified by flash column chromatography on silica gel with EtOAc/hexanes (0/100 to 20/80) as the eluant to obtain (*R*)-*N*-(4'-(*tert*-butoxycarbonyl)aminomethyl)benzyl 2-*N*-(benzyloxycarbonyl)amino-3-

## Supporting Information

methoxypropionamide as a white solid (5.60 g, 91%):  $R_f = 0.30$  (EtOAc/hexanes 2/8); mp 120–121 °C;  $[\alpha]^{26.0}_D -16.2^\circ$  ( $c$  1.0,  $\text{CHCl}_3$ ); IR (nujol) 3321, 2929, 2857, 1684, 1648, 1529, 1457, 1375, 1308, 1251, 1164, 1052, 730  $\text{cm}^{-1}$ ;  $^1\text{H}$  NMR ( $\text{CDCl}_3$ )  $\delta$  1.45 (s,  $\text{C}(\text{CH}_3)_3$ ), 3.35 (s,  $\text{OCH}_3$ ), 3.49 (dd,  $J = 6.6, 9.0$  Hz,  $\text{CHH}'$ ), 3.84 (dd,  $J = 3.6, 9.0$  Hz,  $\text{CHH}'$ ), 4.24–4.38 (br m,  $\text{CHCH}_2$ ,  $\text{CH}_2\text{N}$ ), 4.43 (d,  $J = 5.4$  Hz,  $\text{CH}_2\text{N}$ ), 4.83–4.95 (br s,  $t\text{-BocNH}$ ), 5.10 (s,  $\text{OCH}_2$ ), 5.67–5.76 (br s,  $\text{NH}$ ), 6.69–6.78 (br m,  $\text{NH}$ ), 7.17–7.25 (m, 4  $\text{ArH}$ ), 7.34 (s, 5  $\text{ArH}$ );  $^{13}\text{C}$  NMR ( $\text{CDCl}_3$ )  $\delta$  28.4 (s,  $\text{C}(\text{CH}_3)_3$ ), 41.2, 44.3 (2  $\text{NCH}_2$ ), 54.3 ( $\text{OCH}_2\text{CH}$ ), 59.1 ( $\text{OCH}_3$ ), 67.2 ( $\text{OCH}_2$ ), 72.0 ( $\text{OCH}_2\text{CH}$ ), 79.5 ( $\text{C}(\text{CH}_3)_3$ ), 127.7, 128.1, 128.3, 128.5, 136.0, 136.9, 138.2 (7  $\text{ArC}$ ), 155.8, 156.1 (2  $\text{NC}(\text{O})\text{O}$ ), 169.8 ( $\text{C}(\text{O})$ ), one signal was not detected and is believed to overlap with nearby peaks; HRMS ( $\text{M}+\text{H}^+$ )( $\text{ESI}^+$ ) 472.2448 [ $\text{M} + \text{H}^+$ ] (calcd for  $\text{C}_{25}\text{H}_{33}\text{N}_3\text{O}_6\text{H}^+$  472.2447); Anal. Calcd. for  $\text{C}_{25}\text{H}_{33}\text{N}_3\text{O}_6$ : C, 63.68; H, 7.05; N, 8.91. Found: C, 63.61; H, 7.12; N, 8.88.

**Preparation of (*R*)-*N*-(4'-(*tert*-Butoxycarbonyl)aminomethyl)benzyl 2-Acetamido-3-methoxypropionamide ((*R*)-16).** An EtOH solution (400 mL) of (*R*)-*N*-(4'-(*tert*-butoxycarbonyl)aminomethyl)benzyl 2-*N*-(benzyloxycarbonyl)amino-3-methoxypropionamide (5.30 g, 11.2 mmol) was treated with  $\text{H}_2$  (1 atm) in presence of 10% Pd/C (530 mg) at room temperature (24 h) and then an additional 470 mg of Pd/C was added and then the mixture was allowed to stir at room temperature (12 h). The mixture was carefully filtered through a bed of Celite<sup>®</sup> and the filtrate was evaporated in vacuo to obtain a brown oil.

The oil was dissolved in  $\text{CH}_2\text{Cl}_2$  (100 mL) and then triethylamine (1.9 mL, 13.5 mmol) and acetyl chloride (0.96 mL, 13.5 mmol) were carefully added at 0 °C and the resulting solution was stirred at room temperature (2 h). An aqueous 10% citric acid solution (100 mL) was added and the organic layer was extracted with  $\text{CH}_2\text{Cl}_2$  (3 x 100 mL). The organic layers were combined, washed with a saturated  $\text{NaHCO}_3$  solution (100 mL), dried ( $\text{MgSO}_4$ ), and concentrated in vacuo. The residue was recrystallized from EtOAc to obtain (*R*)-*N*-(4'-(*tert*-butoxycarbonyl)aminomethyl)benzyl 2-acetamido-3-methoxypropionamide as a

## Supporting Information

white solid (2.50 g, 60%):  $R_f = 0.47$  (EtOAc); mp 153–154 °C;  $[\alpha]^{24.9}_D -15.9^\circ$  ( $c$  1.0, CHCl<sub>3</sub>); IR (nujol) 3318, 2919, 2861, 1675, 1639, 1530, 1458, 1374, 1260, 1167, 1127, 1057, 835, 724 cm<sup>-1</sup>; <sup>1</sup>H NMR (CDCl<sub>3</sub>)  $\delta$  1.45 (s, C(CH<sub>3</sub>)<sub>3</sub>), 2.01 (s, CH<sub>3</sub>CO), 3.37 (s, OCH<sub>3</sub>), 3.44 (dd,  $J = 7.2, 9.0$  Hz, CHH'), 3.79 (dd,  $J = 4.2, 9.0$  Hz, CHH'), 4.28 (d,  $J = 5.7$  Hz, CH<sub>2</sub>N), 4.43 (d,  $J = 5.7$  Hz, CH<sub>2</sub>N), 4.51–4.57 (m, CH), 4.86–4.95 (br s, *t*-BocNH), 6.49–6.57 (br d, NHC(O)CH<sub>3</sub>), 6.83–6.93 (br m, CH<sub>2</sub>NH), 7.17–7.26 (m, 4 ArH), addition of excess (*R*)-(-)-mandelic acid to a CDCl<sub>3</sub> solution of (*R*)-*N*-(4'-(*tert*-butoxycarbonyl)aminomethyl)benzyl 2-acetamido-3-methoxypropionamide gave only one signal for the acetyl methyl and one signal for the ether methyl protons; <sup>13</sup>C NMR (CDCl<sub>3</sub>)  $\delta$  23.1 (CH<sub>3</sub>CO), 28.4 (C(CH<sub>3</sub>)<sub>3</sub>), 43.2, 44.3 (2 CH<sub>2</sub>N), 52.4 (CHCH<sub>2</sub>), 59.0 (OCH<sub>3</sub>), 71.7 (CH<sub>2</sub>OCH<sub>3</sub>), 79.5 (C(CH<sub>3</sub>)<sub>3</sub>), 127.7, 136.9, 138.3 (3 ArC), 155.9 (NC(O)O), 170.0, 170.4 (2 C(O)), one signal was not detected and is believed to overlap with nearby peaks; HRMS (M+H<sup>+</sup>)(ESI<sup>+</sup>) 380.2186 [M + H<sup>+</sup>] (calcd for C<sub>19</sub>H<sub>29</sub>N<sub>3</sub>O<sub>5</sub>H<sup>+</sup> 380.2185); Anal. Calcd. for C<sub>19</sub>H<sub>29</sub>N<sub>3</sub>O<sub>5</sub>: C, 60.14; H, 7.70; N, 11.07. Found: C, 60.11; H, 7.83; N, 11.02.

**Preparation of (*R*)-*N*-(4'-Aminomethyl)benzyl 2-Acetamido-3-methoxypropionamide Hydrochloride ((*R*)-15).** A saturated HCl solution in dioxane (11.25 mL, 45.0 mL) was added to (*R*)-*N*-(4'-(*tert*-butoxycarbonyl)aminomethyl)benzyl 2-acetamido-3-methoxypropionamide (1.70 g, 4.5 mmol) at 0 °C and the solution was stirred at room temperature (4 h). The reaction solution was concentrated in vacuo and dried (30 min). The residue was triturated with Et<sub>2</sub>O and the white solid was filtered to obtain (*R*)-*N*-(4'-aminomethyl)benzyl 2-acetamido-3-methoxypropionamide hydrochloride (1.20 g, quant.):  $R_f = 0.00$  (EtOAc); mp > 210 °C;  $[\alpha]^{26.2}_D -1.6^\circ$  ( $c$  1.0, DMSO); IR (nujol) 3124, 2919, 2860, 1635, 1639, 1457, 1374, 1281, 1195, 1121, 974, 728 cm<sup>-1</sup>; <sup>1</sup>H NMR (DMSO-*d*<sub>6</sub>)  $\delta$  1.87 (s, CH<sub>3</sub>CO), 3.25 (s, OCH<sub>3</sub>), 3.44–3.56 (m, CH<sub>2</sub>OH), 3.97 (q,  $J = 5.7$  Hz, CH<sub>2</sub>NH<sub>3</sub>Cl), 4.28 (d,  $J = 6.0$  Hz, CH<sub>2</sub>N), 4.36–4.50 (m, CH), 7.26 (d,  $J = 7.9$  Hz, 2 ArH), 7.43 (d,  $J = 7.9$  Hz, 2 ArH), 8.15 (br d,  $J = 7.8$  Hz, NHC(O)CH<sub>3</sub>), 8.38–8.55 (br m, NH<sub>3</sub>Cl), 8.58 (br t,  $J = 6.0$  Hz, CH<sub>2</sub>NH); <sup>13</sup>C NMR

## Supporting Information

(DMSO- $d_6$ )  $\delta$  22.5 ( $\text{CH}_3\text{CO}$ ), 41.6, 41.8 (2  $\text{CH}_2\text{N}$ ), 52.6 ( $\text{CHCH}_2$ ), 58.1 ( $\text{OCH}_3$ ), 72.0 ( $\text{CH}_2\text{OCH}_3$ ), 127.0, 128.7, 132.2, 139.6 (4  $\text{ArC}$ ), 169.3, 169.7 (2  $\text{C(O)}$ ); HRMS ( $\text{M}+\text{H}^+$ )(ESI $^+$ ) 280.1661 [ $\text{M} + \text{H}^+$ ] (calcd for  $\text{C}_{14}\text{H}_{21}\text{N}_3\text{O}_3\text{H}^+$  280.1661); Anal. Calcd. for  $\text{C}_{14}\text{H}_{22}\text{ClN}_3\text{O}_3 \cdot 0.49 \text{ HCl}$ : C, 50.38; H, 6.79; N, 12.59. Found: C, 50.15; H, 6.90; N, 12.29.

### 11. Preparation of (*R*)-*N*-(4'-(Methoxymethyl))benzyl 2-Acetamido-3-methoxypropionamide ((*R*)-17).

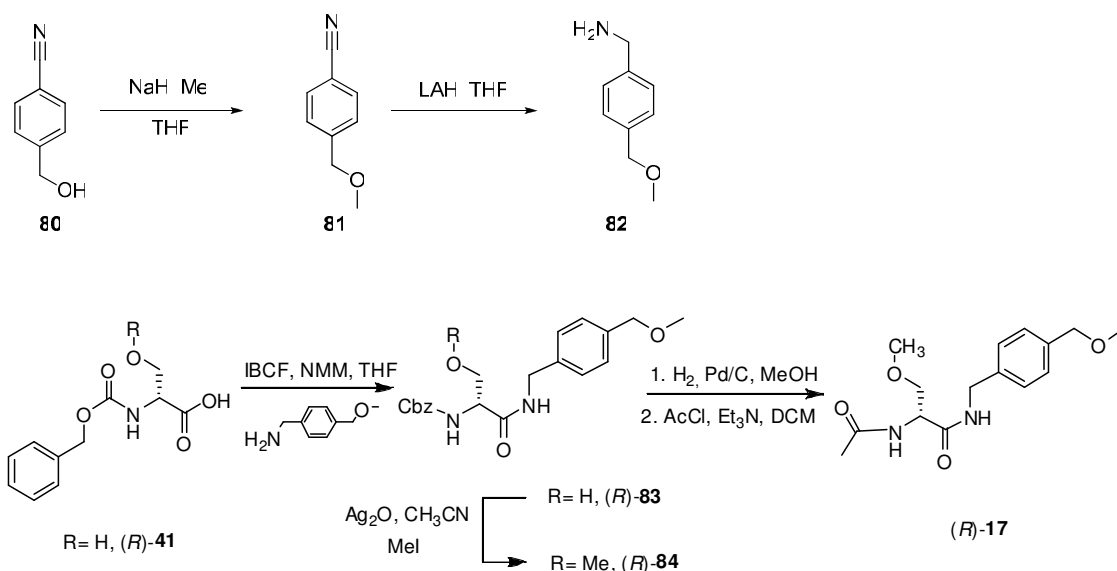

**Preparation of 4-(Methoxymethyl)benzonitrile (**81**).**<sup>1</sup> A THF solution (250 mL) of 4-(hydroxymethyl)benzonitrile (**80**) (10.00 g, 75.0 mmol) was added dropwise at 0 °C to a NaH (60% in mineral oil suspension, 11.50 g, 300.0 mmol) suspension in THF (600 mL). The mixture was stirred (10 min) and MeI (11.7 mL, 187.5 mmol) was added dropwise. The mixture was stirred at room temperature (3 h) and then a saturated aqueous  $\text{NH}_4\text{Cl}$  solution (100 mL) was added. The reaction mixture was extracted with  $\text{CH}_2\text{Cl}_2$  (3 x 250 mL). The organic layers were combined, dried ( $\text{Na}_2\text{SO}_4$ ), and concentrated in vacuo. The residue was distilled in vacuo (125 °C, 5 torr) to obtain a colorless oil (10.50 g, 95%):  $R_f$  = 0.59 (hexanes/EtOAc 9/1);  $^1\text{H NMR}$  ( $\text{CDCl}_3$ )  $\delta$  3.43 (s,  $\text{OCH}_3$ ), 4.51 (s,  $\text{CH}_2\text{O}$ ), 7.44 (d,

## Supporting Information

$J = 8.3$  Hz, 2 ArH), 7.63 (d,  $J = 8.3$  Hz, 2 ArH);  $^{13}\text{C}$  NMR ( $\text{CDCl}_3$ )  $\delta$  58.4 ( $\text{CH}_3\text{O}$ ), 73.5 ( $\text{CH}_2\text{OCH}_3$ ), 111.1 ( $\text{CCN}$ ), 118.7 ( $\text{CN}$ ), 127.6, 132.0, 143.8 (3 ArC); HRMS ( $\text{M} - \text{CH}_3^+$ )(ESI $^+$ ) 132.0443 [ $\text{M} - \text{CH}_3^+$ ] (calcd for  $\text{C}_8\text{H}_6\text{NO}^+$  132.0443).

**Preparation of 4-(Methoxymethyl)benzylamine (82).**<sup>2</sup> To a  $\text{LiAlH}_4$  (7.36 g, 193.7 mmol) suspension in THF (400 mL) was added dropwise a THF (30 mL) solution of 4-(methoxymethyl)benzylamine (81) (9.50 g, 64.6 mmol) at 0 °C. The mixture was stirred at room temperature (16 h) and then  $\text{H}_2\text{O}$  (6 mL) was added dropwise at 0 °C followed by an aqueous NaOH solution (3 mL, 15% w/w), and then  $\text{H}_2\text{O}$  (6 mL). The mixture was stirred at room temperature (2 h) and the precipitate was filtered, and the pad was washed with  $\text{CH}_2\text{Cl}_2$ . The filtrate was concentrated in vacuo to give 8.20 g of a colorless oil (84%):  $R_f = 0.00$  (hexanes/EtOAc 9/1);  $^1\text{H}$  NMR ( $\text{CDCl}_3$ )  $\delta$  1.41 (br s,  $\text{NH}_2$ ), 3.88 (s,  $\text{OCH}_3$ ), 3.86 (s,  $\text{CH}_2\text{NH}_2$ ), 4.47 (s,  $\text{CH}_2\text{O}$ ), 7.20–7.40 (br m, 4 ArH);  $^{13}\text{C}$  NMR ( $\text{CDCl}_3$ )  $\delta$  46.2 ( $\text{CH}_2\text{NH}_2$ ), 58.0 ( $\text{CH}_3\text{O}$ ), 74.4 ( $\text{CH}_2\text{OCH}_3$ ), 127.1, 128.0, 136.7, 142.8 (4 ArC); HRMS ( $\text{M} + \text{H}^+$ )(ESI $^+$ ) 152.1073 [ $\text{M} + \text{H}^+$ ] (calcd for  $\text{C}_9\text{H}_{13}\text{NOH}^+$  152.1075).

**Preparation of (*R*)-*N*-(4'-(Methoxymethyl))benzyl 2-*N*-(Benzyloxycarbonyl)amino-3-hydroxypropionamide ((*R*)-83).** A THF solution (75 mL) of (*R*)-Cbz-serine (5.30 g, 22.0 mmol) was stirred and cooled at -78 °C under Ar and then 4-methylmorpholine (NMM) (2.9 mL, 26.4 mmol) was added dropwise. After 2 min of stirring at this temperature, isobutylchloroformate (IBCF) (3.5 mL, 26.4 mmol) was added dropwise leading to the precipitation of a white solid, and the reaction was allowed to proceed for additional 2 min. 4-Methoxymethylbenzylamine (4.00 g, 26.4 mmol) was added portionwise at -78 °C and the mixture was stirred at room temperature (2 h). The white solid was filtered and the organic layer was concentrated in vacuo. The residue was triturated with EtOAc resulting in a solid that was filtered and recrystallized with EtOAc to give (*R*)-*N*-(4'-(methoxymethyl))benzyl 2-*N*-(benzyloxycarbonyl)amino-3-hydroxypropionamide as a white solid (7.20 g, 88%):  $R_f = 0.63$  (EtOAc); mp 138–140 °C;  $[\alpha]_D^{25.8} -34.0^\circ$  ( $c$  1.0, DMSO); IR (nujol) 3385, 3294, 3106, 2923,

## Supporting Information

2859, 1690, 1646, 1544, 1458, 1373, 1307, 1243, 1098, 1028, 919, 738, 694  $\text{cm}^{-1}$ ;  $^1\text{H}$  NMR ( $\text{CDCl}_3$ )  $\delta$  3.36 (s,  $\text{OCH}_3$ ), 3.64 (dd,  $J = 5.1, 10.8$  Hz  $\text{CHH}'\text{OH}$ ), 3.88–4.06 (br d,  $\text{CHH}'\text{OH}$ ), 4.19–4.29 (m,  $\text{CH}$ ), 4.34–4.45 (m,  $\text{CH}_2\text{OCH}_3$ ,  $\text{NCH}_2$ ), 5.06 (s,  $\text{CH}_2\text{O}$ ), 6.96 (d,  $J = 7.2$  Hz,  $\text{OC}(\text{O})\text{NH}$ ), 7.02–7.14 (br s,  $\text{NH}$ ), 7.19 (d,  $J = 7.8$  Hz, 2  $\text{ArH}$ ), 7.27 (d,  $J = 7.8$  Hz, 2  $\text{ArH}$ ), 7.30–7.38 (m, 5  $\text{ArH}$ );  $^{13}\text{C}$  NMR ( $\text{CDCl}_3$ )  $\delta$  43.2 ( $\text{NCH}_2$ ), 55.5 ( $\text{OCH}_2\text{CH}$ ), 58.1 ( $\text{CH}_3\text{O}$ ), 62.7 ( $\text{OCH}_2\text{CH}$ ), 67.3 ( $\text{CH}_2\text{O}$ ), 74.3 ( $\text{CH}_2\text{OCH}_3$ ), 127.6, 128.0, 128.1, 128.3, 128.5, 135.9, 137.0, 137.5 (8  $\text{ArC}$ ), 156.7 ( $\text{OC}(\text{O})\text{N}$ ), 170.7 ( $\text{C}(\text{O})$ ); HRMS ( $\text{M}+\text{H}^+$ )( $\text{ESI}^+$ ) 373.1764 [ $\text{M} + \text{H}^+$ ] (calcd for  $\text{C}_{20}\text{H}_{24}\text{N}_2\text{O}_5\text{H}^+$  373.1763); Anal. Calcd. for  $\text{C}_{20}\text{H}_{24}\text{N}_2\text{O}_5 \cdot 0.25\text{H}_2\text{O}$ : C, 63.73; H, 6.55; N, 7.43. Found: C, 63.35; H, 6.43; N, 7.29.

**Preparation of (*R*)-*N*-(4'-(Methoxymethyl))benzyl 2-*N*-(Benzyloxycarbonyl)amino-3-methoxypropionamide ((*R*)-84).**  $\text{Ag}_2\text{O}$  (12.40 g, 53.7 mmol) was added to a  $\text{CH}_3\text{CN}$  solution (100 mL) of (*R*)-*N*-(4'-(methoxymethyl))benzyl 2-*N*-(benzyloxycarbonyl)amino-3-hydroxypropionamide (4.00 g, 10.7 mmol) and  $\text{CH}_3\text{I}$  (6.71 mL, 107.5 mmol) at room temperature under Ar. The reaction mixture was stirred at room temperature (2 d), filtered through a pad of Celite<sup>®</sup>, and the filtrate concentrated in vacuo to obtain 3.90 g of the desired compound as a white solid (94%):  $R_f = 0.79$  (EtOAc); mp 107–108 °C;  $[\alpha]^{24.6}_{\text{D}} -22.1^\circ$  ( $c$  1.0,  $\text{CHCl}_3$ ); IR (nujol) 3285, 2958, 2732, 2681, 1688, 1645, 1545, 1458, 1376, 1305, 1240, 1112, 1048, 966, 815, 729, 696  $\text{cm}^{-1}$ ;  $^1\text{H}$  NMR ( $\text{CDCl}_3$ )  $\delta$  3.36, 3.38 (2 s, 2  $\text{OCH}_3$ ), 3.49 (dd,  $J = 6.6, 9.3$  Hz,  $\text{CHH}'$ ), 3.85 (dd,  $J = 3.3, 9.3$  Hz,  $\text{CHH}'$ ), 4.28–4.38 (br m,  $\text{CHCH}_2$ ), 4.43 (s,  $\text{CH}_2\text{OCH}_3$ ), 4.46 (d,  $J = 6.3$  Hz,  $\text{CH}_2\text{N}$ ), 5.11 (s,  $\text{OCH}_2$ ), 5.64–5.72 (br m,  $\text{OC}(\text{O})\text{NH}$ ), 6.66–6.74 (br m,  $\text{CH}_2\text{NH}$ ), 7.23 (d,  $J = 8.4$  Hz, 2  $\text{ArH}$ ), 7.29 (d,  $J = 8.4$  Hz, 2  $\text{ArH}$ ), 7.31–7.38 (m, 5  $\text{ArH}$ );  $^{13}\text{C}$  NMR ( $\text{CDCl}_3$ )  $\delta$  43.2 ( $\text{NCH}_2$ ), 54.3 ( $\text{OCH}_2\text{CH}$ ), 58.0 ( $\text{CH}_2\text{OCH}_3$ ) 59.0 ( $\text{OCH}_3$ ), 67.2 ( $\text{PhCH}_2\text{O}$ ), 72.0 ( $\text{OCH}_2\text{CH}$ ), 74.3 ( $\text{CH}_2\text{OCH}_3$ ), 127.5, 128.0, 128.1, 128.2, 128.5, 136.0, 137.2, 137.6 (8  $\text{ArC}$ ), 156.1 ( $\text{OC}(\text{O})$ ), 169.8 ( $\text{C}(\text{O})$ ); HRMS ( $\text{M}+\text{H}^+$ )( $\text{ESI}^+$ ) 387.1920 [ $\text{M} + \text{H}^+$ ] (calcd for  $\text{C}_{21}\text{H}_{26}\text{N}_2\text{O}_5\text{H}^+$  387.1920); Anal. Calcd. for  $\text{C}_{21}\text{H}_{26}\text{N}_2\text{O}_5$ : C, 65.27; H, 6.78; N, 7.25. Found: C, 65.27; H, 6.79; N, 7.38.

## Supporting Information

**Preparation of (*R*)-*N*-(4'-(Methoxymethyl))benzyl 2-Acetamido-3-methoxypropionamide ((*R*)-17).** A MeOH solution (400 mL) of (*R*)-*N*-(4'-(methoxymethyl))benzyl 2-*N*-(benzyloxycarbonyl)amino-3-methoxypropionamide (3.50 g, 9.1 mmol) was treated with H<sub>2</sub> (1 atm) in presence of 10% Pd/C (350 mg) at room temperature (16 h). The mixture was carefully filtered through a bed of Celite<sup>®</sup> and the filtrate was evaporated in vacuo to obtain a colorless oil. The oil was dissolved in CH<sub>2</sub>Cl<sub>2</sub> (150 mL) and then triethylamine (1.52 mL, 10.9 mmol) and acetyl chloride (772 μL, 10.9 mmol) were carefully added at 0 °C and the resulting solution was stirred at room temperature (2 h). An aqueous 10% citric acid solution (150 mL) was added and the mixture was extracted with CH<sub>2</sub>Cl<sub>2</sub> (3 x 100 mL). The organic layers were combined, washed with an aqueous saturated NaHCO<sub>3</sub> solution (100 mL), dried (MgSO<sub>4</sub>), and concentrated in vacuo. The residue was triturated with EtOAc to give (*R*)-*N*-(4'-(methoxymethyl))benzyl 2-acetamido-3-methoxypropionamide as a white solid (1.50 g, 56%): *R*<sub>f</sub> = 0.35 (EtOAc); mp 119–120 °C; [α]<sub>D</sub><sup>25</sup> –25.4° (c 0.5, CHCl<sub>3</sub>); IR (nujol) 3266, 3069, 2935, 2863, 1635, 1550, 1458, 1457, 1382, 1282, 1226, 1194, 1125, 948, 836, 792, 726 cm<sup>-1</sup>; <sup>1</sup>H NMR (CDCl<sub>3</sub>) δ 2.03 (s, CH<sub>3</sub>CO), 3.37, 3.38 (2 s, 2 OCH<sub>3</sub>), 3.43 (dd, *J* = 7.5, 9.1 Hz, CHH'), 3.80 (dd, *J* = 4.2, 9.1 Hz, CHH'), 4.41–4.49 (m, CH<sub>2</sub>OCH<sub>3</sub>, CH<sub>2</sub>N), 4.51–4.58 (m, CH), 6.42–6.52 (br d, NHC(O)CH<sub>3</sub>), 6.75–6.84 (br t, CH<sub>2</sub>NH), 7.24 (d, *J* = 7.9 Hz, 2 ArH), 7.30 (d, *J* = 7.9 Hz, 2 ArH), addition of excess (*R*)-(-)-mandelic acid to a CDCl<sub>3</sub> solution of (*R*)-*N*-(4'-(methoxymethyl))benzyl 2-acetamido-3-methoxypropionamide gave only one signal for the acetyl methyl and one signal for the ether methyl protons; <sup>13</sup>C NMR (CDCl<sub>3</sub>) δ 23.2 (CH<sub>3</sub>CO), 43.3 (CH<sub>2</sub>N), 52.5 (CHCH<sub>2</sub>), 58.1 (OCH<sub>3</sub>), 59.1 (OCH<sub>3</sub>), 71.8 (CH<sub>2</sub>OCH<sub>3</sub>), 74.3 (CH<sub>2</sub>OMe), 127.5, 128.1, 137.3, 137.5 (4 ArC), 170.0, 170.3 (2 C(O)); HRMS (M+H<sup>+</sup>)(ESI<sup>+</sup>) 295.1658 [M + H<sup>+</sup>] (calcd for C<sub>15</sub>H<sub>22</sub>N<sub>2</sub>O<sub>4</sub>H<sup>+</sup> 295.1658); Anal. Calcd. for C<sub>15</sub>H<sub>22</sub>N<sub>2</sub>O<sub>4</sub>: C, 61.21; H, 7.45; N, 9.52. Found: C, 60.88; H, 7.45; N, 9.35.

**12. Preparation of (*R*)-*N*-(4'-Trifluoromethyl)benzyl 2-Acetamido-3-methoxypropionamide ((*R*)-18).**

## Supporting Information

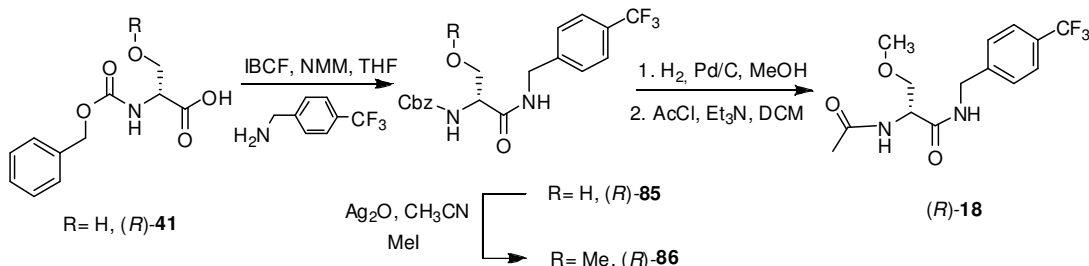

### Preparation of (*R*)-*N*-(4'-Trifluoromethyl)benzyl 2-*N*-

**(Benzyloxycarbonyl)amino-3-hydroxypropionamide ((*R*)-85).** A THF solution (200 mL) of (*R*)-Cbz-serine (6.00 g, 25.1 mmol) was stirred and cooled at -78 °C under Ar and then 4-methylmorpholine (NMM) (3.3 mL, 30.1 mmol) was added dropwise. After 2 min of stirring at this temperature, isobutylchloroformate (IBCF) (3.9 mL, 30.1 mmol) was added dropwise leading to the precipitation of a white solid, and the reaction was allowed to proceed for additional 2 min and then 4-trifluoromethylbenzylamine (4.3 mL, 30.1 mmol) was added portionwise at -78 °C. The mixture was allowed to stir at room temperature (2 h), and then the white solid filtered and the organic layer concentrated in vacuo. The residue was recrystallized with EtOAc to obtain (*R*)-*N*-(4'-trifluoromethyl)benzyl 2-*N*-(benzyloxycarbonyl)amino-3-hydroxypropionamide as a white solid (1.50 g). The solid obtained during the first filtration was washed with H<sub>2</sub>O and CHCl<sub>3</sub>. The remaining solid was recrystallized with EtOAc to obtain (*R*)-*N*-(4'-trifluoromethyl)benzyl 2-*N*-(benzyloxycarbonyl)amino-3-hydroxypropionamide as a white solid (4.80 g,  $m_T = 6.30$  g, 63%):  $R_f = 0.17$  (hexanes/EtOAc 5/5); mp 160-161 °C;  $[\alpha]^{25.9}_D -12.0^\circ$  ( $c$  0.5, DMSO); IR (nujol) 3119, 2945, 2862, 1689, 1645, 1565, 1530, 1458, 1375, 1334, 1243, 1165, 1113, 1024, 964, 738 cm<sup>-1</sup>; <sup>1</sup>H NMR (DMSO-*d*<sub>6</sub>)  $\delta$  3.57–3.66 (m, CHH', CHH'), 4.04–4.12 (br m, CH), 4.37 (d,  $J = 6.0$  Hz, CH<sub>2</sub>N), 4.92 (t,  $J = 5.7$  Hz, OH), 5.05 (s, CH<sub>2</sub>O), 7.27–7.38 (m, NH, 5 ArH), 7.47 (d,  $J = 8.1$  Hz, 2 ArH), 7.65 (d,  $J = 8.1$  Hz, 2 ArH), 8.55 (t,  $J = 5.7$  Hz, CH<sub>2</sub>NH); <sup>13</sup>C NMR (DMSO-*d*<sub>6</sub>)  $\delta$  41.7 (NCH<sub>2</sub>), 57.3 (OCH<sub>2</sub>CH), 61.6 (OCH<sub>2</sub>CH),



## Supporting Information

65.5 (PhCH<sub>2</sub>O), 124.3 (q,  $J = 269.8$  Hz, CF<sub>3</sub>), 124.9 (br q,  $J = 3.4$  Hz, CCF<sub>3</sub>), 127.5, 127.7, 128.2, 136.9, 144.3 (5 ArC), 155.9 (NC(O)O), 170.4 (C(O)), 2 signals were not detected and are believed to overlap with nearby peaks; Anal. Calcd. for C<sub>19</sub>H<sub>19</sub>F<sub>3</sub>N<sub>2</sub>O<sub>4</sub>•0.08C<sub>4</sub>H<sub>8</sub>O<sub>2</sub>: C, 57.52; H, 4.91; F, 14.11; N, 6.93. Found: C, 57.14; H, 4.82; F, 13.71; N, 6.99.

**Preparation of (*R*)-*N*-(4'-Trifluoromethyl)benzyl 2-*N*-(Benzyloxycarbonyl)amino-3-methoxypropionamide ((*R*)-86).** Ag<sub>2</sub>O (12.95 g, 55.5 mmol) was added to a CH<sub>3</sub>CN solution (400 mL) of (*R*)-*N*-(4'-trifluoromethyl)benzyl 2-*N*-(benzyloxycarbonyl)amino-3-hydroxypropionamide (4.40 g, 11.1 mmol) and CH<sub>3</sub>I (6.9 mL, 111.1 mmol) at room temperature under Ar. The reaction mixture was stirred at room temperature in the dark (4 d), filtered through a pad of Celite<sup>®</sup>, and the filtrate concentrated in vacuo to obtain a white solid. The solid was purified by flash column chromatography on silica gel with EtOAc/hexanes (50/50) as the eluant to obtain (*R*)-*N*-(4'-trifluoromethyl)benzyl 2-*N*-(benzyloxycarbonyl)amino-3-methoxypropionamide as a white solid (1.30 g, 29%):  $R_f = 0.37$  (1/1 EtOAc/hexanes); mp 120–124 °C;  $[\alpha]^{24.6}_D +16.0^\circ$  ( $c$  0.5, DMSO); IR (nujol) 3297, 2957, 2728, 1687, 1650, 1537, 1457, 1373, 1329, 1240, 1164, 1116, 1063, 958, 845, 733 cm<sup>-1</sup>; <sup>1</sup>H NMR (CDCl<sub>3</sub>)  $\delta$  3.38 (s, OCH<sub>3</sub>), 3.51 (dd,  $J = 6.3, 9.0$  Hz, CHH'), 3.88 (dd,  $J = 3.6, 9.0$  Hz, CHH'), 4.31–4.42 (br m, CHCH<sub>2</sub>), 4.53 (d,  $J = 6.3$  Hz, CH<sub>2</sub>N), 5.13 (s, OCH<sub>2</sub>), 5.61–5.70 (br m, OC(O)NH), 6.73–6.85 (br m, CH<sub>2</sub>NH), 7.29–7.40 (s, 7 ArH), 7.57 (d,  $J = 8.1$  Hz, 2 ArH); <sup>13</sup>C NMR (CDCl<sub>3</sub>)  $\delta$  42.9 (NCH<sub>2</sub>), 54.4 (OCH<sub>2</sub>CH), 59.1 (OCH<sub>3</sub>), 67.3 (PhCH<sub>2</sub>O), 71.9 (OCH<sub>2</sub>CH), 124.0 (q,  $J = 270.4$  Hz, CF<sub>3</sub>), 125.6 (q,  $J = 4.0$  Hz, C<sub>3</sub>), 127.5, 128.1, 128.3, 128.6 (4 ArC), 129.7 (q,  $J = 31.9$  Hz, C<sub>4</sub>), 135.9, 142.0 (2 ArC), 156.1 (NC(O)O), 170.2 (C(O)); HRMS (M+H<sup>+</sup>)(ESI<sup>+</sup>) 411.1538 [M + H<sup>+</sup>] (calcd for C<sub>20</sub>H<sub>21</sub>F<sub>3</sub>N<sub>2</sub>O<sub>4</sub>H<sup>+</sup> 411.1531).

**Preparation of (*R*)-*N*-(4'-Trifluoromethyl)benzyl 2-Acetamido-3-methoxypropionamide ((*R*)-18).** An EtOH solution (250 mL) of (*R*)-*N*-(4'-trifluoromethyl)benzyl 2-*N*-(benzyloxycarbonyl)amino-3-methoxypropionamide

## Supporting Information

(1.20 g, 3.0 mmol) was treated with H<sub>2</sub> (1 atm) in presence of 10% Pd/C (120 mg) at room temperature (16 h). The mixture was carefully filtered through a bed of Celite<sup>®</sup>. The pad was washed with MeOH and CH<sub>2</sub>Cl<sub>2</sub>, and the washings were collected and evaporated in vacuo to obtain a yellow solid: <sup>1</sup>H NMR (CDCl<sub>3</sub>) δ 1.62–1.67 (br d, NH<sub>2</sub>), 3.39 (s, OCH<sub>3</sub>), 3.58–3.72 (m, CH<sub>2</sub>, CH), 4.52 (d, *J* = 6.0 Hz, NCH<sub>2</sub>), 7.39 (d, *J* = 8.2 Hz, 2 ArH), 7.58 (d, *J* = 8.2 Hz, 2 ArH), 7.88–7.89 (br s, NHC(O)).

The residue was dissolved in CH<sub>2</sub>Cl<sub>2</sub> (40 mL) and then triethylamine (0.5 mL, 3.5 mmol) and acetyl chloride (250 μL, 3.5 mmol) were carefully added at 0 °C and the resulting solution was stirred at room temperature (2 h). An aqueous 10% citric acid solution (100 mL) was added and the organic layer was extracted with CH<sub>2</sub>Cl<sub>2</sub> (3 x 100 mL). The organic layers were combined, washed with a saturated aqueous NaHCO<sub>3</sub> solution (100 mL), dried (MgSO<sub>4</sub>), and concentrated in vacuo. After recrystallization of the residue with EtOAc (*R*)-*N*-(4'-trifluoromethyl)benzyl 2-acetamido-3-methoxypropionamide was obtained as a white solid (495 mg, 55%): *R<sub>f</sub>* = 0.45 (EtOAc); mp 160–161 °C; [*α*]<sub>D</sub><sup>26.7</sup> +2.6° (*c* 0.5, DMSO); IR (nujol) 3393, 3278, 3145, 2923, 2834, 2723, 2673, 1638, 1552, 1456, 1374, 1157, 1111, 965, 840, 726 cm<sup>-1</sup>; <sup>1</sup>H NMR (CDCl<sub>3</sub>) δ 2.05 (s, CH<sub>3</sub>CO), 3.40 (s, OCH<sub>3</sub>), 3.45 (dd, *J* = 7.8, 9.3 Hz, CHH'), 3.83 (dd, *J* = 4.2, 9.3 Hz, CHH'), 4.50–4.61 (m, CH<sub>2</sub>N, CH), 6.37–6.44 (br d, NHC(O)CH<sub>3</sub>), 6.85–6.94 (br t, CH<sub>2</sub>NH), 7.38 (d, *J* = 8.2 Hz, 2 ArH), 7.58 (d, *J* = 8.2 Hz, 2 ArH), addition of excess (*R*)-(-)-mandelic acid to a CDCl<sub>3</sub> solution of (*R*)-*N*-(4'-trifluoromethyl)benzyl 2-acetamido-3-methoxypropionamide gave only one signal for the acetyl methyl and one signal for the ether methyl protons; <sup>13</sup>C NMR (CDCl<sub>3</sub>) δ 23.1 (CH<sub>3</sub>CO), 42.9 (CH<sub>2</sub>N), 52.5 (CHCH<sub>2</sub>), 59.1 (OCH<sub>3</sub>), 71.6 (CH<sub>2</sub>OCH<sub>3</sub>), 124.0 (q, *J* = 270.4 Hz, CF<sub>3</sub>), 125.6 (q, *J* = 3.4 Hz, C<sub>3</sub>), 127.5 (C<sub>2</sub>), 129.7 (q, *J* = 31.9 Hz, C<sub>4</sub>), 142.0 (C<sub>1</sub>), 170.3, 170.5 (2 C(O)); HRMS (M+H<sup>+</sup>)(ESI<sup>+</sup>) 319.1270 [M + H<sup>+</sup>] (calcd for C<sub>14</sub>H<sub>17</sub>F<sub>3</sub>N<sub>2</sub>O<sub>3</sub>H<sup>+</sup> 307.1269); Anal. Calcd. for C<sub>14</sub>H<sub>17</sub>F<sub>3</sub>N<sub>2</sub>O<sub>3</sub>: C, 52.83; H, 5.38; F, 17.91; N, 8.80. Found: C, 52.84; H, 5.30; F, 17.67; N, 8.78.

### 13. Preparation of (*R*)-*N*-(4'-(3-hydroxypropyl))benzyl 2-Acetamido-3-methoxypropionamide ((*R*)-19).

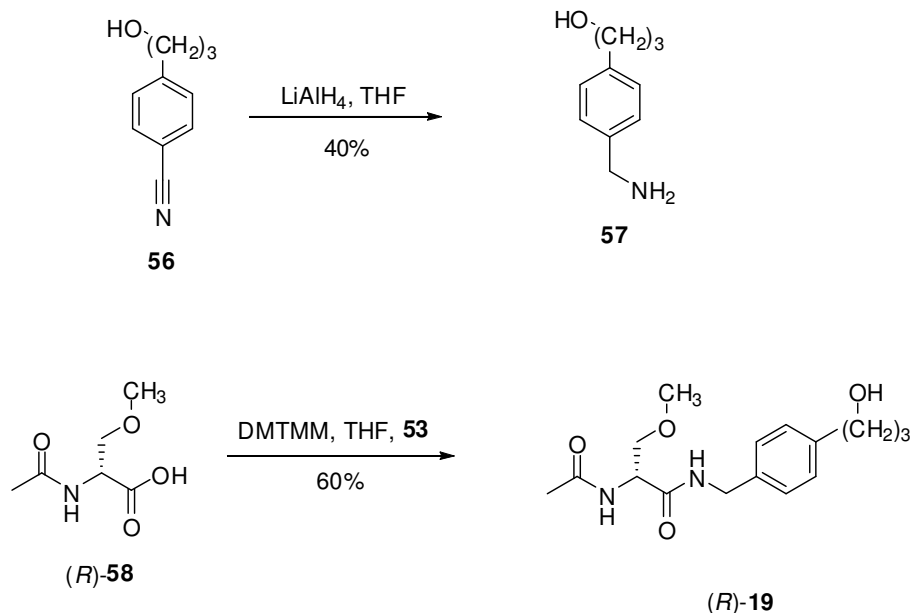

**Preparation of 4-(3-Hydroxypropyl)benzylamine (57).** To a  $\text{LiAlH}_4$  (1.41 g, 37.2 mmol) suspension in THF (120 mL) was added dropwise a THF (10 mL) solution of 4-(3-hydroxypropyl)benzonitrile (**56**)<sup>3</sup> (2.00 g, 12.4 mmol) at 0 °C. The mixture was stirred at room temperature (16 h) and then  $\text{H}_2\text{O}$  (1.2 mL) was added dropwise at 0 °C followed by an aqueous NaOH solution (0.65 mL, 15% w/w), and then  $\text{H}_2\text{O}$  (1.2 mL). The mixture was stirred at room temperature (2 h) and the precipitate was filtered, and the pad was washed with  $\text{CH}_2\text{Cl}_2$ . The filtrate was concentrated in vacuo to give 610 mg of a colorless oil (84%):  $R_f = 0.00$  (hexanes/EtOAc 5/5);  $^1\text{H NMR}$  ( $\text{DMSO}-d_6$ )  $\delta$  1.62–1.73 (m,  $\text{NH}_2$ ,  $\text{CH}_2\text{CH}_2\text{CH}_2$ ), 2.56 (t,  $J = 7.8$  Hz,  $\text{CH}_2\text{Ar}$ ), 3.36–3.44 (br m,  $\text{HOCH}_2$ ), 3.65 (s,  $\text{CH}_2\text{NH}_2$ ), 4.41–4.49 (br m,  $\text{HO}$ ), 7.10 (d,  $J = 8.1$  Hz, 2 ArH), 7.21 (d,  $J = 8.1$  Hz, 2 ArH); HRMS ( $\text{M}+\text{H}^+$ )(ESI<sup>+</sup>) 166.1632 [ $\text{M} + \text{H}^+$ ] (calcd for  $\text{C}_{10}\text{H}_{15}\text{NOH}^+$  166.1231); Anal. Calcd. for  $\text{C}_{10}\text{H}_{15}\text{NO}\cdot 0.12\text{THF}$ : C, 72.38; H, 9.25; N, 8.04. Found: C, 72.78; H, 9.25; N, 7.65.

## Supporting Information

**Preparation of (*R*)-*N*-(4'-(3-Hydroxypropyl))benzyl 2-Acetamido-3-methoxypropionamide ((*R*)-19).** 4-(3-Hydroxypropyl)benzylamine (600 mg, 3.6 mmol) was added to a THF (33 mL) solution of the (*R*)-2-acetamido-3-methoxypropionic acid ((*R*)-58)<sup>4</sup> (532 mg, 3.3 mmol) and the mixture was stirred at room temperature (5 min). DMTMM<sup>5</sup> (1.10 mg, 4.0 mmol) was added, and the reaction was stirred at room temperature (16 h). The white precipitate was filtered and the filtrate was concentrated in vacuo. The residue was purified by flash column chromatography on silica gel with EtOAc to EtOAc/acetone (5/5) as the eluant to obtain after recrystallisation with EtOAc a white solid (560 mg, 55%):  $R_f = 0.26$  (8/2 EtOAc/acetone); mp 118 °C;  $[\alpha]^{26.9}_D -25.0^\circ$  ( $c$  0.5, CHCl<sub>3</sub>); IR (nujol) 3339, 3279, 2951, 2862, 1630, 1552, 1456, 1376, 1304, 1195, 1140, 1097, 1038, 909, 820, 724 cm<sup>-1</sup>; <sup>1</sup>H NMR (CDCl<sub>3</sub>)  $\delta$  1.34–1.45 (br m, OH), 1.83–1.93 (br m, CH<sub>2</sub>CH<sub>2</sub>CH<sub>2</sub>), 2.03 (s, CH<sub>3</sub>CO), 2.70 (t,  $J = 7.8$  Hz, CH<sub>2</sub>Ar), 3.38 (s, OCH<sub>3</sub>), 3.43 (dd,  $J = 7.5, 9.0$  Hz, CHH'), 3.63–3.72 (br m, CH<sub>2</sub>OH), 3.80 (dd,  $J = 3.9, 9.0$  Hz, CHH'), 4.44 (d,  $J = 6.0$  Hz, CH<sub>2</sub>N), 6.41–4.50 (br d, CH<sub>3</sub>C(O)NH), 6.69–6.79 (m, NH), 7.12–7.23 (m, 4 ArH), addition of excess (*R*)-(-)-mandelic acid to a CDCl<sub>3</sub> solution of (*R*)-*N*-(4'-(3-hydroxypropyl))benzyl 2-acetamido-3-methoxypropionamide gave only one signal for the acetyl methyl and one signal for the ether methyl protons; <sup>13</sup>C NMR (CDCl<sub>3</sub>)  $\delta$  23.0 (C(O)CH<sub>3</sub>), 31.7, 34.2 (2 CH<sub>2</sub>), 43.2 (NCH<sub>2</sub>), 52.6 (CHCH<sub>2</sub>), 59.0 (OCH<sub>3</sub>), 61.9 (CH<sub>2</sub>OH), 72.1 (CH<sub>2</sub>O), 127.5, 128.7, 135.3, 141.2 (4 ArC), 170.1, 170.6 (2 C(O)); HRMS (M+H<sup>+</sup>)(ESI<sup>+</sup>) 309.1815 [M + H<sup>+</sup>] (calcd for C<sub>16</sub>H<sub>24</sub>N<sub>2</sub>O<sub>4</sub>H<sup>+</sup> 319.1814); Anal. Calcd. for C<sub>16</sub>H<sub>24</sub>N<sub>2</sub>O<sub>4</sub>: C, 62.32; H, 7.84; N, 9.08. Found: C, 62.33; H, 7.69; N, 9.12.

### 14. Preparation of (*R*)-*N*-(4'-(3-Methoxypropyl))benzyl 2-Acetamido-3-methoxypropionamide ((*R*)-20).

**Preparation of (*R*)-*N*-(4'-(3-Methoxypropyl))benzyl 2-Acetamido-3-methoxypropionamide ((*R*)-20).** An EtOH solution (30 mL) of (*R*)-*N*-(4'-(3-methoxyprop-1-ynyl))benzyl 2-acetamido-3-methoxypropionamide ((*R*)-27) (1.00 g, 3.1 mmol) was treated with H<sub>2</sub> (1 atm) in the presence of 10% PtO<sub>2</sub> (50 mg) at

## Supporting Information

room temperature (16 h). The mixture was carefully filtered through a bed of Celite<sup>®</sup>. The filtrate was concentrated in vacuo and the residue was purified by flash chromatography on silica gel with EtOAc as the eluant to obtain (*R*)-*N*-(4'-(3-methoxypropyl))benzyl 2-acetamido-3-methoxypropionamide (510 mg, 51%) as a white solid:  $R_f = 0.27$  (EtOAc); mp 105–107 °C;  $[\alpha]_D^{25} +3.0^\circ$  ( $c$  0.5, DMSO); IR (nujol) 3283, 3085, 1638, 1550, 1457, 1379, 1299, 1122, 979, 725, 605  $\text{cm}^{-1}$ ;  $^1\text{H}$  NMR ( $\text{CDCl}_3$ )  $\delta$  1.81–1.92 (m,  $\text{CH}_2$ ), 2.03 (s,  $\text{CH}_3\text{CO}$ ), 2.67 (t,  $J = 7.8$  Hz,  $\text{CH}_2\text{Ph}$ ), 3.33–3.46 (m,  $\text{CHH}'\text{O}$ ,  $\text{CH}_2\text{O}$ , 2  $\text{OCH}_3$ ), 3.80 (dd,  $J = 4.0, 9.1$  Hz,  $\text{CHH}'\text{O}$ ), 4.44 (d,  $J = 5.7$  Hz,  $\text{CH}_2\text{N}$ ), 4.50–4.57 (m,  $\text{CH}$ ), 6.45 (br d,  $J = 6.6$  Hz,  $\text{NHC(O)CH}_3$ ), 6.70–6.75 (br t,  $\text{CH}_2\text{NH}$ ), 7.15–7.20 (m, 4  $\text{ArH}$ ), addition of excess (*R*)-(-)-mandelic acid to a  $\text{CDCl}_3$  solution of (*R*)-*N*-(4'-(3-methoxypropyl))benzyl 2-acetamido-3-methoxypropionamide gave only one signal for the acetyl methyl and one signal for the ether methyl protons;  $^{13}\text{C}$  NMR ( $\text{CDCl}_3$ )  $\delta$  23.2 ( $\text{CH}_3\text{CO}$ ), 31.2, 31.9 (2  $\text{CH}_2$ ), 43.3 ( $\text{CH}_2\text{N}$ ), 52.4 ( $\text{CHCH}_2$ ), 58.6, 59.1 (2  $\text{OCH}_3$ ), 71.7, 71.9 (2  $\text{CH}_2\text{OMe}$ ), 127.5, 128.8, 135.3, 141.4 (4  $\text{ArC}$ ), 169.9, 170.2 (2  $\text{C(O)}$ ); HRMS ( $\text{M}+\text{Na}^+$ )(ESI<sup>+</sup>) 345.1784 [ $\text{M} + \text{Na}^+$ ] (calcd for  $\text{C}_{17}\text{H}_{26}\text{N}_2\text{O}_4\text{Na}^+$  345.1790); Anal. Calcd. for  $\text{C}_{17}\text{H}_{26}\text{N}_2\text{O}_4$ : C, 63.33; H, 8.13; N, 8.69. Found: C, 63.12; H, 8.13; N, 8.64.

### 15. Preparation of (*R*)- and (*S*)-*N*-(4'-Vinyl)benzyl 2-Acetamido-3-methoxypropionamide ((*R*)- and (*S*)-21).

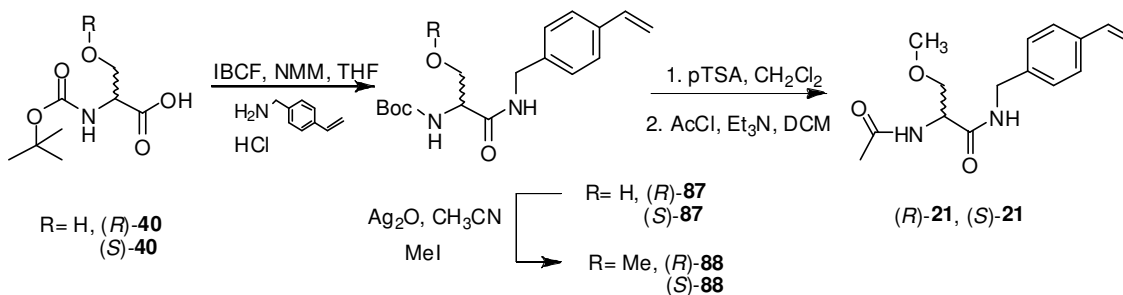

**Preparation of (*R*)-*N*-(4'-Vinyl)benzyl 2-*N*-(*tert*-Butoxycarbonyl)amino-3-hydroxypropionamide ((*R*)-87).** A THF solution (140 mL) of (*R*)-*tert*-Boc-serine (1.00 g, 4.87 mmol) was stirred and cooled at -78 °C under Ar and then 4-

## Supporting Information

methylmorpholine (NMM) (607  $\mu\text{L}$ , 5.85 mmol) was added dropwise. The reaction was stirred at this temperature (2 min) and then isobutylchloroformate (IBCF) (765  $\mu\text{L}$ , 5.85 mmol) was added dropwise leading to the precipitation of a white solid. The reaction was allowed to proceed for additional 2 min. A heterogeneous THF (10 mL) mixture of 4-aminomethylstyrene hydrochloride (911 mg, 5.40 mmol) and NMM (593  $\mu\text{L}$ , 5.40 mmol) was added portionwise at  $-78\text{ }^{\circ}\text{C}$ . The mixture was allowed to stir at room temperature (2 h) and the white solid was filtered and the organic layer was concentrated in vacuo. The residue was purified by flash chromatography on silica gel with EtOAc/hexanes (50/50 to 100/0) as the eluant to obtain (*R*)-*N*-(4'-vinyl)benzyl 2-*N*-(*tert*-butoxycarbonyl)amino-3-hydroxypropionamide (950 mg, 60%) as a white solid:  $R_f$  = 0.43 (7/3 EtOAc/hexanes); mp  $109\text{ }^{\circ}\text{C}$ ;  $[\alpha]_D^{24} +1.7^{\circ}$  ( $c$  2.8,  $\text{CH}_2\text{Cl}_2$ ); IR (nujol) 3317, 1657, 1532, 1458, 1376, 1305, 1242, 1170, 1008, 1005, 900, 850, 631  $\text{cm}^{-1}$ ;  $^1\text{H}$  NMR ( $\text{CDCl}_3$ )  $\delta$  1.41 (s,  $(\text{CH}_3)_3\text{C}$ ), 3.65–3.70 (m,  $\text{HOCHH}'$ ), 4.03–4.09 (br m,  $\text{HOCHH}'$ ), 4.20 (br s,  $\text{CHCH}_2$ ), 4.36–4.47 (m,  $\text{CH}_2\text{N}$ ), 5.24 (d,  $J_{cis} = 10.5\text{ Hz}$ ,  $\text{CH}=\text{CHH}'$ ), 5.71 (d,  $J_{trans} = 17.4\text{ Hz}$ ,  $\text{CH}=\text{CHH}'$ ), 5.72 (br s, 1H, *tert*-BocNH), 6.68 (dd,  $J_{cis} = 10.5\text{ Hz}$ ,  $J_{trans} = 17.4\text{ Hz}$ ,  $\text{CH}=\text{CH}_2$ ), 7.19 (d,  $J = 8.2\text{ Hz}$ , 2 ArH), 7.34 (d,  $J = 8.2\text{ Hz}$ , 2 ArH);  $^{13}\text{C}$  NMR ( $\text{CDCl}_3$ )  $\delta$  28.3 ( $(\text{CH}_3)_3\text{C}$ ), 43.2 ( $\text{NCH}_2$ ), 55.1 ( $\text{OCH}_2\text{CH}$ ), 62.8 ( $\text{OCH}_2\text{CH}$ ), 80.6 ( $(\text{CH}_3)_3\text{C}$ ), 114.0 ( $\text{CH}=\text{CH}_2$ ), 126.5, 127.7, 136.3, 136.9, 137.3 (4 ArC,  $\text{CH}=\text{CH}_2$ ), 156.3 ( $\text{NC(O)O}$ ), 171.3 ( $\text{C(O)}$ ); HRMS ( $\text{M}+\text{Na}^+$ )(ESI $^+$ ) 343.1624 [ $\text{M} + \text{Na}^+$ ] (calcd for  $\text{C}_{17}\text{H}_{24}\text{N}_2\text{O}_4\text{Na}^+$  343.1628). Anal. Calcd. For  $\text{C}_{17}\text{H}_{24}\text{N}_2\text{O}_4$ : C, 63.73; H, 7.55; N, 8.74. Found: C, 63.45; H, 7.60; N, 8.70.

**Preparation of (*S*)-*N*-(4'-Vinyl)benzyl 2-*N*-(*tert*-Butoxycarbonyl)amino-3-hydroxypropionamide ((*S*)-87).** Employing the same procedure for (*R*)-*N*-(4'-vinyl)benzyl 2-*N*-(*tert*-butoxycarbonyl)amino-3-hydroxypropionamide and using (*S*) *tert*-Boc-serine (1.00 g, 4.87 mmol), NMM (1.24 mL, 11.25 mmol), IBCF (765  $\mu\text{L}$ , 5.85 mmol), and 4-aminomethylstyrene hydrochloride (911 mg, 5.40 mmol) in THF (150 mL) gave 700 mg (45%) of a white solid:  $R_f$  = 0.43 (7/3 EtOAc/hexanes); mp  $109\text{ }^{\circ}\text{C}$ ;  $[\alpha]_D^{24} -1.7^{\circ}$  ( $c$  2.8,  $\text{CH}_2\text{Cl}_2$ ); IR (nujol) 3316, 1656,

## Supporting Information

1530, 1458, 1375, 1305, 1241, 1167, 1004  $\text{cm}^{-1}$ ;  $^1\text{H}$  NMR ( $\text{CDCl}_3$ )  $\delta$  1.41 (s,  $(\text{CH}_3)_3\text{C}$ ), 3.46–3.49 (br m,  $\text{CHH}'\text{OH}$ ), 3.67–3.70 (br m,  $\text{CHH}'\text{OH}$ ), 4.09 (br d,  $J = 11.4$  Hz,  $\text{OH}$  or  $\text{CHCH}_2$ ), 4.17–4.21 (br m,  $\text{OH}$  or  $\text{CHCH}_2$ ), 4.35–4.45 (m,  $\text{CH}_2\text{N}$ ), 5.24 (d,  $J_{\text{cis}} = 10.5$  Hz,  $\text{CH}=\text{CHH}'$ ), 5.67 (br s, *tert*-BocNH), 5.71 (d,  $J_{\text{trans}} = 17.4$  Hz,  $\text{CH}=\text{CHH}'$ ), 6.68 (dd,  $J_{\text{cis}} = 10.5$  Hz,  $J_{\text{trans}} = 17.4$  Hz,  $\text{CH}=\text{CH}_2$ ), 7.15 (br s,  $\text{CH}_2\text{NH}$ ), 7.19 (d,  $J = 8.2$  Hz, 2 ArH), 7.34 (d,  $J = 8.2$  Hz, 2 ArH);  $^{13}\text{C}$  NMR ( $\text{CDCl}_3$ )  $\delta$  28.3 ( $(\text{CH}_3)_3\text{C}$ ), 43.1 ( $\text{NCH}_2$ ), 55.0 ( $\text{OCH}_2\text{CH}$ ), 62.9 ( $\text{OCH}_2\text{CH}$ ), 80.7 ( $(\text{CH}_3)_3\text{C}$ ), 114.0 ( $\text{CH}=\text{CH}_2$ ), 126.5, 127.7, 136.4, 136.9, 137.3 (4 ArC,  $\text{CH}=\text{CH}_2$ ), 156.3 ( $\text{NC}(\text{O})\text{O}$ ), 171.4 ( $\text{C}(\text{O})$ ); HRMS ( $\text{M}+\text{Na}^+$ )(ESI $^+$ ) 343.1624 [ $\text{M} + \text{Na}^+$ ] (calcd for  $\text{C}_{17}\text{H}_{24}\text{N}_2\text{O}_4\text{Na}^+$  343.1629); Anal. Calcd. For  $\text{C}_{17}\text{H}_{24}\text{N}_2\text{O}_4$ : C, 63.73; H, 7.55; N, 8.74. Found: C, 63.55; H, 7.63; N, 8.57.

**Preparation of (*R*)-*N*-(4'-Vinyl)benzyl 2-*N*-(*tert*-Butoxycarbonyl)amino-3-methoxypropionamide ((*R*)-88).**  $\text{Ag}_2\text{O}$  (3.15 g, 13.6 mmol) was added to a  $\text{CH}_3\text{CN}$  solution (40 mL) of (*R*)-*N*-(4'-vinyl)benzyl 2-*N*-(*tert*-butoxycarbonyl)amino-3-hydroxypropionamide (0.87 g, 2.7 mmol) and then  $\text{CH}_3\text{I}$  (1.7 mL, 27.2 mmol) was added at room temperature under Ar. The reaction mixture was stirred at room temperature (3 d), filtered through a pad of Celite $^{\text{®}}$ , and the filtrate concentrated in vacuo. The residue was purified by column chromatography ( $\text{SiO}_2$ ; 2/3 EtOAc/hexanes) to obtain 700 mg (77%) of an oil that crystallized after a few days:  $R_f = 0.67$  (1/1 EtOAc/hexanes); mp 67  $^{\circ}\text{C}$ ;  $[\alpha]_{\text{D}}^{22} +11.2^{\circ}$  ( $c$  1.0, MeOH); IR (nujol) 3322, 1658, 1525, 1458, 1375, 1302, 1246, 1164, 1047, 955, 900, 719  $\text{cm}^{-1}$ ;  $^1\text{H}$  NMR ( $\text{CDCl}_3$ )  $\delta$  1.38 (s,  $(\text{CH}_3)_3\text{C}$ ), 3.29 (s,  $\text{OCH}_3$ ), 3.45 (dd,  $J = 6.0, 9.3$  Hz,  $\text{CHH}'$ ), 3.75 (dd,  $J = 3.9, 9.3$  Hz,  $\text{CHH}'$ ), 4.25–4.31 (br m,  $\text{CHCH}_2$ ), 4.32–4.45 (m,  $\text{CH}_2\text{N}$ ), 5.17 (d,  $J_{\text{cis}} = 10.8$  Hz,  $\text{CH}=\text{CHH}'$ ), 5.53 (br d,  $J = 5.7$  Hz, *tert*-BocNH), 5.68 (d,  $J_{\text{trans}} = 17.7$  Hz,  $\text{CH}=\text{CHH}'$ ), 6.64 (dd,  $J_{\text{cis}} = 10.8$  Hz,  $J_{\text{trans}} = 17.7$  Hz,  $\text{CH}=\text{CH}_2$ ), 6.95 (br t,  $J = 5.1$  Hz,  $\text{CH}_2\text{NH}$ ), 7.16 (d,  $J = 8.1$  Hz, 2 ArH), 7.30 (d,  $J = 8.1$  Hz, 2 ArH);  $^{13}\text{C}$  NMR ( $\text{CDCl}_3$ )  $\delta$  28.1 ( $(\text{CH}_3)_3\text{C}$ ), 42.9 ( $\text{NCH}_2$ ), 53.9 ( $\text{OCH}_2\text{CH}$ ), 58.8 ( $\text{OCH}_3$ ), 72.0 ( $\text{OCH}_2\text{CH}$ ), 80.0 ( $(\text{CH}_3)_3\text{C}$ ), 113.6 ( $\text{CH}=\text{CH}_2$ ), 126.2, 127.4, 136.2, 136.6, 137.5 (4 ArC,  $\text{CH}=\text{CH}_2$ ), 155.4 ( $\text{NC}(\text{O})\text{O}$ ), 170.2

## Supporting Information

(C(O)). Anal. Calcd. For C<sub>18</sub>H<sub>26</sub>N<sub>2</sub>O<sub>4</sub>: C, 64.65; H, 7.84; N, 8.38. Found: C, 64.51; H, 7.88; N, 8.33.

**Preparation of (S)-N-(4'-Vinyl)benzyl 2-N-(tert-Butoxycarbonyl)amino-3-methoxypropionamide ((S)-88).** Employing the same procedure for (R)-N-(4'-vinyl)benzyl 2-N-(tert-butoxycarbonyl)amino-3-methoxypropionamide and using (S)-N-(4'-vinyl)benzyl 2-N-(tert-butoxycarbonyl)amino-3-hydroxypropionamide (2.50 g, 7.8 mmol), Ag<sub>2</sub>O (9.00 g, 39.1 mmol), and MeI (4.9 mL, 78.0 mmol) gave 2.05 g (77%) of (S)-N-(4'-vinyl)benzyl 2-N-(tert-butoxycarbonyl)amino-3-methoxypropionamide after silica gel column chromatography: *R<sub>f</sub>* = 0.67 (1/1 EtOAc/hexanes); mp 67 °C;  $[\alpha]_D^{22} -11.0^\circ$  (c 1.0, MeOH); IR (nujol) 3349, 2727, 1659, 1525, 1458, 1374, 1302, 1246, 1164, 1115, 1048, 722 cm<sup>-1</sup>; <sup>1</sup>H NMR (CDCl<sub>3</sub>) δ 1.42 (s, (CH<sub>3</sub>)<sub>3</sub>C), 3.34 (s, OCH<sub>3</sub>), 3.50 (dd, *J* = 6.0, 9.1 Hz, CHH'), 3.79 (dd, *J* = 3.9, 9.1 Hz, CHH'), 4.24–4.36 (br m, CHCH<sub>2</sub>), 4.37–4.48 (m, CH<sub>2</sub>N), 5.22 (d, *J<sub>cis</sub>* = 10.7 Hz, CH=CHH'), 5.50–5.55 (br m, *tert*-BocNH), 5.71 (d, *J<sub>trans</sub>* = 17.7 Hz, CH=CHH'), 6.68 (dd, *J<sub>cis</sub>* = 10.7 Hz, *J<sub>trans</sub>* = 17.7 Hz, CH=CH<sub>2</sub>), 6.91–6.98 (br m, CH<sub>2</sub>NH), 7.19 (d, *J* = 8.1 Hz, 2 ArH), 7.34 (d, *J* = 8.1 Hz, 2 ArH); <sup>13</sup>C NMR (CDCl<sub>3</sub>) δ 28.1 ((CH<sub>3</sub>)<sub>3</sub>C), 42.9 (NCH<sub>2</sub>), 54.0 (OCH<sub>2</sub>CH), 58.9 (OCH<sub>3</sub>), 72.0 (OCH<sub>2</sub>CH), 80.1 ((CH<sub>3</sub>)<sub>3</sub>C), 113.7 (CH=CH<sub>2</sub>), 126.3, 127.5, 136.2, 136.6, 137.5 (4 ArC, CH=CH<sub>2</sub>), 155.4 (NC(O)O), 170.2 (C(O)); HRMS (M+Na<sup>+</sup>)(ESI<sup>+</sup>) 357.1784 [M + Na<sup>+</sup>] (calcd for C<sub>18</sub>H<sub>26</sub>N<sub>2</sub>O<sub>4</sub>Na<sup>+</sup> 357.1790); Anal. Calcd. For C<sub>18</sub>H<sub>26</sub>N<sub>2</sub>O<sub>4</sub>: C, 64.65; H, 7.84; N, 8.38. Found: C, 64.73; H, 7.98; N, 8.25.

**Preparation of (R)-N-(4'-Vinyl)benzyl 2-Acetamido-3-methoxypropionamide ((R)-21).** pTSA (769 mg, 4.04 mmol) was added to a CH<sub>2</sub>Cl<sub>2</sub> (6 mL) solution of (R)-N-(4'-vinyl)benzyl 2-N-(tert-butoxycarbonyl)amino-3-methoxypropionamide (900 mg, 2.7 mmol). The reaction was stirred at room temperature (24 h). Et<sub>3</sub>N (2.3 mL, 16.2 mmol) follow by AcCl (574 μL, 8.1 mmol) were added at 0 °C. The solution was stirred at room temperature (30 min). Aqueous 10% citric acid was added and then the organic layer was separated. The aqueous layer was washed with CH<sub>2</sub>Cl<sub>2</sub> (2 x 30 mL). The organic layers were



## Supporting Information

combined, washed with aqueous saturated NaHCO<sub>3</sub> and H<sub>2</sub>O, dried (MgSO<sub>4</sub>), and concentrated in vacuo. The residue was purified by column chromatography (SiO<sub>2</sub>; EtOAc) to obtain 700 mg (77%) of white solid.  $R_f = 0.49$  (5/5 EtOAc/acetone); mp = 148–149 °C;  $[\alpha]_D^{26} = +3.5^\circ$  (*c* 1.0, DMSO); IR (nujol) 3281, 3093, 1638, 1552, 1456, 1381, 1298, 1246, 1125, 1043, 986, 917, 825, 722, 604 cm<sup>-1</sup>; <sup>1</sup>H NMR (CDCl<sub>3</sub>) δ 2.03 (s, CH<sub>3</sub>CO), 3.38 (s, OCH<sub>3</sub>), 3.43 (dd,  $J = 7.2, 9.0$ , Hz, CHH'), 3.80 (dd,  $J = 4.2, 9.0$ , Hz, CHH'), 4.43–4.52 (m, CH<sub>2</sub>N), 4.53–4.58 (m, NC(H)CO), 5.24 (d,  $J_{cis} = 10.8$  Hz, CH=CHH'), 5.75 (d,  $J_{trans} = 17.7$  Hz, CH=CHH'), 6.46 (br d,  $J = 6.6$  Hz, NHC(O)CH<sub>3</sub>), 6.70 (dd,  $J_{cis} = 10.8$  Hz,  $J_{trans} = 17.7$  Hz, CH=CH<sub>2</sub>), 6.75–6.82 (br m, CH<sub>2</sub>NH), 7.24 (d,  $J = 8.1$  Hz, 2 ArH), 7.35 (d,  $J = 8.1$  Hz, 2 ArH), addition of excess (*R*)-(-)-mandelic acid to a CDCl<sub>3</sub> solution of (*R*)-*N*-(4'-vinyl)benzyl 2-acetamido-3-methoxypropionamide gave only one signal for the acetyl methyl and one signal for the ether methyl protons; <sup>13</sup>C NMR (CDCl<sub>3</sub>) δ 23.3 (CH<sub>3</sub>CO), 43.4 (CH<sub>2</sub>N), 52.6 (CHCH<sub>2</sub>), 59.2 (OCH<sub>3</sub>), 72.0 (CH<sub>2</sub>OCH<sub>3</sub>), 114.1 (CH=CH<sub>2</sub>), 126.7, 127.8, 136.6, 137.0, 137.6 (4 ArC, CH=CH<sub>2</sub>), 170.2, 170.6 (2 C(O)). HRMS (M+K<sup>+</sup>)(ESI<sup>+</sup>) 315.1115 [M + K<sup>+</sup>] (calcd for C<sub>15</sub>H<sub>20</sub>N<sub>2</sub>O<sub>3</sub>K<sup>+</sup> 315.1111); Anal. Calcd. for C<sub>15</sub>H<sub>20</sub>N<sub>2</sub>O<sub>3</sub>: C, 65.20; H, 7.30; N, 10.14. Found: C, 65.17; H, 7.33; N, 10.02.

**Preparation of (*S*)-*N*-(4'-Vinyl)benzyl 2-Acetamido-3-methoxypropionamide ((*S*)-21).** Employing the same procedure for (*R*)-*N*-(4'-vinyl)benzyl 2-acetamido-3-methoxypropionamide and using (*S*)-*N*-(4'-vinyl)benzyl 2-*N*-(*tert*-butoxycarbonyl)amino-3-methoxypropionamide (900 mg, 2.7 mmol), Et<sub>3</sub>N (2.3 mL, 16.2 mmol) and AcCl (574 μL, 8.1 mmol) gave 690 mg (76%) of (*S*)-*N*-(4'-vinyl)benzyl 2-acetamido-3-methoxypropionamide after silica gel column chromatography:  $R_f = 0.45$  (1/9 MeOH/EtOAc); mp 140–142 °C;  $[\alpha]_D^{26} = -3.1^\circ$  (*c* 1.0, DMSO); IR (nujol) 3284, 3087, 1640, 1548, 1457, 1378, 1298, 1244, 1198, 1127, 1046, 985, 912, 826, 721 cm<sup>-1</sup>; <sup>1</sup>H NMR (CDCl<sub>3</sub>) δ 2.02 (s, CH<sub>3</sub>CO), 3.38 (s, OCH<sub>3</sub>), 3.44 (dd,  $J = 7.5, 9.0$ , Hz, CHH'), 3.80 (dd,  $J = 4.2, 9.0$ , Hz, CHH'), 4.39–4.48 (m, CH<sub>2</sub>N), 4.53–4.59 (m, NC(H)CO), 5.24 (d,  $J_{cis} = 11.1$  Hz, CH=CHH'), 5.75 (d,  $J_{trans} = 17.4$  Hz, CH=CHH'), 6.48 (br d,  $J = 6.6$  Hz,

## Supporting Information

NHC(O)CH<sub>3</sub>), 6.70 (dd,  $J_{cis} = 11.1$  Hz,  $J_{trans} = 17.4$  Hz, CH=CH<sub>2</sub>), 6.82–6.85 (br m, CH<sub>2</sub>NH), 7.22 (d,  $J = 8.1$  Hz, 2 ArH), 7.34 (d,  $J = 8.1$  Hz, 2 ArH), addition of excess (*R*)-(-)-mandelic acid to a CDCl<sub>3</sub> solution of (*S*)-*N*-(4'-vinyl)benzyl 2-acetamido-3-methoxypropionamide gave only one signal for the acetyl methyl and one signal for the ether methyl protons; <sup>13</sup>C NMR (CDCl<sub>3</sub>) δ 23.4 (CH<sub>3</sub>CO), 43.5 (CH<sub>2</sub>N), 52.6 (CHCH<sub>2</sub>), 59.3 (OCH<sub>3</sub>), 71.9 (CH<sub>2</sub>OCH<sub>3</sub>), 114.2 (CH=CH<sub>2</sub>), 126.7, 127.8, 136.5, 137.1, 137.6 (4 ArC, CH=CH<sub>2</sub>), 170.2, 170.5 (2 C(O)); HRMS (M+K<sup>+</sup>)(ESI<sup>+</sup>) [M + K<sup>+</sup>] 315.1114 (calcd for C<sub>15</sub>H<sub>20</sub>N<sub>2</sub>O<sub>3</sub>K<sup>+</sup> 315.1111); Anal. Calcd. for C<sub>15</sub>H<sub>20</sub>N<sub>2</sub>O<sub>3</sub>•0.10H<sub>2</sub>O: C, 64.78; H, 7.32; N, 10.07. Found: C, 64.83; H, 7.31; N, 10.00.

### 16. Preparation of (*R*)-*N*-(Biphenyl-4-yl)methyl 2-Acetamido-3-methoxypropionamide ((*R*)-22).

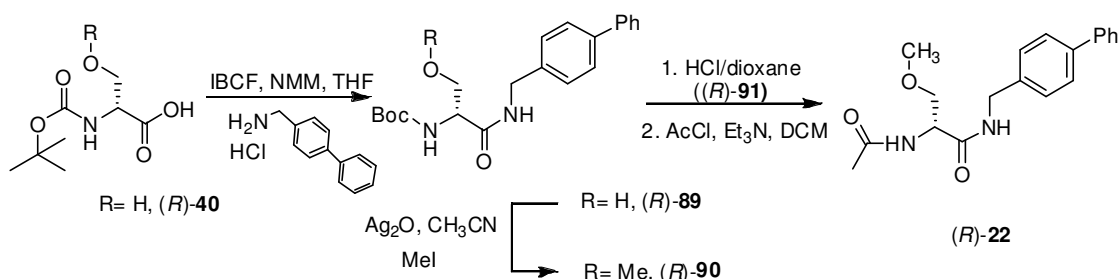

**Preparation of (*R*)-*N*-(Biphenyl-4-yl)methyl 2-*N*-(*tert*-Butoxycarbonyl)amino-3-hydroxypropionamide ((*R*)-89).** A THF solution (300 mL) of (*R*)-*t*-Boc-serine (4.66 g, 22.8 mmol) was stirred and cooled at -78 °C under Ar and then 4-methylmorpholine (NMM) (3.0 mL, 27.3 mmol) was added dropwise. After 2 min of stirring at this temperature, isobutylchloroformate (IBCF) (3.6 mL, 27.3 mmol) was added dropwise leading to the precipitation of a white solid, and the reaction was allowed to proceed for additional 2 min before adding 4-phenylbenzylamine (5.00 g, 27.3 mmol) portionwise at -78 °C. The mixture was allowed to stir at room temperature (2 h), and then the white solid was filtered and the organic layer concentrated in vacuo. The residue was recrystallized with EtOAc to obtain (*R*)-*N*-(biphenyl-4-yl)methyl 2-*N*-(*tert*-butoxycarbonyl)amino-3-

## Supporting Information

hydroxypropionamide as white needles (4.30 g, 51%):  $R_f = 0.20$  (hexanes/EtOAc 5/5); mp 132–134 °C;  $[\alpha]^{25.9}_D +14.6^\circ$  ( $c$  1.0,  $\text{CHCl}_3$ ); IR (nujol) 3312, 2960, 2912, 2859, 1658, 1535, 1458, 1378, 1305, 1242, 1171, 1109, 1007, 846, 696  $\text{cm}^{-1}$ ;  $^1\text{H}$  NMR ( $\text{CDCl}_3$ )  $\delta$  1.41 (s,  $(\text{CH}_3)_3\text{C}$ ), 3.57–3.75 (m,  $\text{CHH}'$ ,  $\text{CHH}'$ ), 4.04–4.25 (br m,  $\text{OH}$ ,  $\text{CH}$ ), 4.40–4.59 (m,  $\text{CH}_2\text{N}$ ), 5.62–5.78 (br m,  $\text{NH}$ ), 7.28–7.45 (m, 5  $\text{ArH}$ ), 7.53 (m, 4  $\text{ArH}$ );  $^{13}\text{C}$  NMR ( $\text{CDCl}_3$ )  $\delta$  28.2 ( $(\text{CH}_3)_3\text{C}$ ), 43.1 ( $\text{NCH}_2$ ), 54.9 ( $\text{OCH}_2\text{CH}$ ), 62.8 ( $\text{OCH}_2\text{CH}$ ), 80.6 ( $(\text{CH}_3)_3\text{C}$ ), 127.0, 127.3, 127.4, 127.9, 128.8, 136.7, 140.5, 140.7 (8  $\text{ArC}$ ), 156.3 ( $\text{NC}(\text{O})\text{O}$ ), 171.4 ( $\text{C}(\text{O})$ ); MS ( $\text{M}+\text{H}^+$ )(ESI $^+$ ) 371.1 [ $\text{M} + \text{H}^+$ ] (calcd for  $\text{C}_{21}\text{H}_{26}\text{N}_2\text{O}_4\text{H}^+$  371.2); Anal. Calcd. for  $\text{C}_{21}\text{H}_{26}\text{N}_2\text{O}_4$ : C, 68.09; H, 7.07; N, 7.56. Found: C, 68.09; H, 7.14; N, 7.48.

**Preparation of (*R*)-*N*-(Biphenyl-4-yl)methyl 2-*N*-(*tert*-Butoxycarbonyl)amino-3-methoxypropionamide ((*R*)-90).**  $\text{Ag}_2\text{O}$  (12.60 g, 54.0 mmol) was added to a  $\text{CH}_3\text{CN}$  solution (300 mL) of (*R*)-*N*-(biphenyl-4-yl)methyl 2-*N*-(*tert*-butoxycarbonyl)amino-3-hydroxypropionamide (4.00 g, 10.8 mmol) and  $\text{CH}_3\text{I}$  (6.7 mL, 108.1 mmol) at room temperature under Ar. The reaction mixture was stirred at room temperature in the dark (4 d), filtered through a pad of Celite $^{\text{®}}$ , and the filtrate concentrated in vacuo to obtain a white solid. The solid was purified by flash column chromatography on silica gel with EtOAc/hexanes (70/30 to 50/50) as the eluant to obtain (*R*)-*N*-(biphenyl-4-yl)methyl 2-*N*-(*tert*-butoxycarbonyl)amino-3-methoxypropionamide as a white solid (3.70 g, 89%):  $R_f = 0.42$  (1/1 EtOAc/hexanes); mp 105–106 °C;  $[\alpha]^{26.7}_D -12.6^\circ$  ( $c$  1.0,  $\text{CHCl}_3$ ); IR (nujol) 3208, 2957, 2728, 1657, 1534, 1458, 1375, 1303, 1243, 1172, 1108, 1054, 961, 729  $\text{cm}^{-1}$ ;  $^1\text{H}$  NMR ( $\text{CDCl}_3$ )  $\delta$  1.44 (s,  $(\text{CH}_3)_3\text{C}$ ), 3.38 (s,  $\text{OCH}_3$ ), 3.51 (dd,  $J = 6.3, 9.0$  Hz,  $\text{CHH}'$ ), 3.87 (dd,  $J = 3.9, 9.0$  Hz,  $\text{CHH}'$ ), 4.24–4.35 (br m,  $\text{CHCH}_2$ ), 4.53 (d,  $J = 5.1$  Hz,  $\text{CH}_2\text{N}$ ), 5.36–5.47 (br m,  $\text{OC}(\text{O})\text{NH}$ ), 6.73–6.82 (br t,  $\text{CH}_2\text{NH}$ ), 7.30–7.38 (s, 3  $\text{ArH}$ ), 7.41–7.47 (m, 2  $\text{ArH}$ ), 7.54–7.59 (m, 4  $\text{ArH}$ );  $^{13}\text{C}$  NMR ( $\text{CDCl}_3$ )  $\delta$  28.2 ( $(\text{CH}_3)_3\text{C}$ ), 43.2 ( $\text{NCH}_2$ ), 54.0 ( $\text{OCH}_2\text{CH}$ ), 59.1 ( $\text{OCH}_3$ ), 72.0 ( $\text{OCH}_2\text{CH}$ ), 80.4 ( $(\text{CH}_3)_3\text{C}$ ), 127.0, 127.3, 127.4, 127.9, 128.8, 137.0, 140.4, 140.7 (8  $\text{ArC}$ ), 155.5 ( $\text{NC}(\text{O})\text{O}$ ), 170.3 ( $\text{C}(\text{O})$ ); Anal. Calcd. for  $\text{C}_{22}\text{H}_{28}\text{N}_2\text{O}_4$ : C, 68.73; H, 7.34; N, 7.29. Found: C, 68.52; H, 7.48; N, 7.24.

## Supporting Information

**Preparation of (*R*)-*N*-(Biphenyl-4-yl)methyl 2-Amino 3-methoxypropionamide Hydrochloride ((*R*)-91).** A saturated HCl solution in dioxane (1 mmol/2 mL, 11.5 mL) was added to (*R*)-*N*-(biphenyl-4-yl)methyl 2-*N*-(*tert*-butoxycarbonyl)amino-3-methoxypropionamide (2.20 g, 5.7 mmol) at 0 °C and the solution was stirred at room temperature (12 h). A second saturated HCl solution in dioxane (1 mmol/2 mL, 11.5 mL) was added to the reaction solution and the solution was stirred at room temperature (6 h). The white solid was filtered to obtain 1.25 g (70%) of (*R*)-*N*-(biphenyl-4-yl)methyl 2-amino 3-methoxypropionamide hydrochloride: mp 145–148 °C;  $[\alpha]_D^{27.0} +33.2^\circ$  (*c* 0.5, H<sub>2</sub>O); IR (nujol) 3253, 3212, 2917, 2860, 1660, 1563, 1459, 1375, 1253, 1182, 1105, 1013, 962, 760 cm<sup>-1</sup>; <sup>1</sup>H NMR (DMSO-*d*<sub>6</sub>) δ 3.32 (s, OCH<sub>3</sub>), 3.75 (d, *J* = 4.6 Hz, OCH<sub>2</sub>), 4.09 (t, *J* = 4.6 Hz, CHCH<sub>2</sub>), 4.36–4.44 (m, CH<sub>2</sub>N), 7.34–7.41 (s, 3 ArH), 7.43–7.90 (m, 2 ArH), 7.61–7.68 (m, 4 ArH), 8.31–8.44 (br s, NH<sub>3</sub>Cl), 9.22 (t, *J* = 5.7 Hz, C(O)NH); <sup>13</sup>C NMR (DMSO-*d*<sub>6</sub>) δ 41.9 (NCH<sub>2</sub>), 52.1 (OCH<sub>2</sub>CH), 59.4 (OCH<sub>3</sub>), 70.3 (OCH<sub>2</sub>CH), 126.5, 126.5, 127.3, 127.7, 128.8, 137.7, 138.8, 139.8 (8 ArC), 166.2 (C(O)); Anal. Calcd. for C<sub>17</sub>H<sub>21</sub>ClN<sub>2</sub>O<sub>2</sub>: C, 63.64; H, 6.60; Cl, 11.05; N, 8.73. Found: C, 63.42; H, 6.65; Cl, 11.04; N, 8.64.

**Preparation of (*R*)-*N*-(Biphenyl-4-yl)methyl 2-Acetamido-3-methoxypropionamide ((*R*)-22).** Triethylamine (0.79 mL, 5.7 mmol) and acetyl chloride (561 μL, 2.8 mmol) were carefully added at 0 °C to a CH<sub>2</sub>Cl<sub>2</sub> solution of (*R*)-*N*-(biphenyl-4-yl)methyl 2-amino 3-methoxypropionamide hydrochloride (600 mg, 1.9 mmol) and the resulting solution was stirred at room temperature (2 h). An aqueous 10% citric acid solution (100 mL) was added and the organic layer was extracted with CH<sub>2</sub>Cl<sub>2</sub> (3 x 100 mL). The organic layers were combined, washed with a saturated NaHCO<sub>3</sub> solution (100 mL), dried (MgSO<sub>4</sub>), and concentrated in vacuo. The residue was purified by flash column chromatography on silica gel with EtOAc/MeOH (100/0 to 80/20) as the eluant to obtain (*R*)-*N*-(biphenyl-4-yl)methyl 2-acetamido-3-methoxypropionamide. The solid was recrystallized (EtOAc) to obtain 380 mg (55%) of the desired product as a white

## Supporting Information

solid:  $R_f = 0.20$  (EtOAc); mp 178–180 °C;  $[\alpha]_D^{26.9} -8.8^\circ$  ( $c$  0.5,  $\text{CHCl}_3$ ); IR (nujol) 3293, 3087, 2870, 1642, 1547, 1457, 1376, 1298, 1127, 727  $\text{cm}^{-1}$ ;  $^1\text{H}$  NMR ( $\text{CDCl}_3$ )  $\delta$  2.04 (s,  $\text{CH}_3\text{CO}$ ), 3.40 (s,  $\text{OCH}_3$ ), 3.45 (dd,  $J = 7.5, 9.2$  Hz,  $\text{CHH}'$ ), 3.83 (dd,  $J = 3.9, 9.2$  Hz,  $\text{CHH}'$ ), 4.50–4.61 (m,  $\text{CH}_2\text{N}$ ,  $\text{CH}$ ), 6.45 (br d,  $J = 5.7$  Hz,  $\text{NHC(O)CH}_3$ ), 6.76–6.84 (br t,  $\text{CH}_2\text{NH}$ ), 7.31–7.38 (m, 3 ArH), 7.41–7.48 (m, 2 ArH), 7.55–7.60 (m, 4 ArH), addition of excess (*R*)-(-)-mandelic acid to a  $\text{CDCl}_3$  solution of (*R*)-*N*-(biphenyl-4-yl)methyl 2-acetamido-3-methoxypropionamide gave only one signal for the acetyl methyl and one signal for the ether methyl protons;  $^{13}\text{C}$  NMR ( $\text{CDCl}_3$ )  $\delta$  23.2 ( $\text{CH}_3\text{CO}$ ), 43.2 ( $\text{CH}_2\text{N}$ ), 52.4 ( $\text{CHCH}_2$ ), 59.1 ( $\text{OCH}_3$ ), 71.6 ( $\text{CH}_2\text{OCH}_3$ ), 127.0, 127.3, 127.4, 127.8, 128.8, 136.9, 140.5 (7 ArC), 170.0, 170.3 (2 C(O)), 1 signal was not detected and is believed to overlap with nearby peaks; HRMS ( $\text{M}+\text{H}^+$ )( $\text{ESI}^+$ ) 327.1709 [ $\text{M} + \text{H}^+$ ] (calcd for  $\text{C}_{19}\text{H}_{22}\text{N}_2\text{O}_3\text{H}^+$  327.1708); Anal. Calcd. for  $\text{C}_{19}\text{H}_{22}\text{N}_2\text{O}_3 \cdot 0.1\text{H}_2\text{O}$ : C, 69.54; H, 6.82; N, 8.54. Found: C, 69.23; H, 6.76; N, 8.42.

### 17. Preparation of (*R*)- and (*S*)-*N*-(4'-Ethynyl)benzyl 2-Acetamido-3-methoxypropionamide ((*R*)- and (*S*)-23).

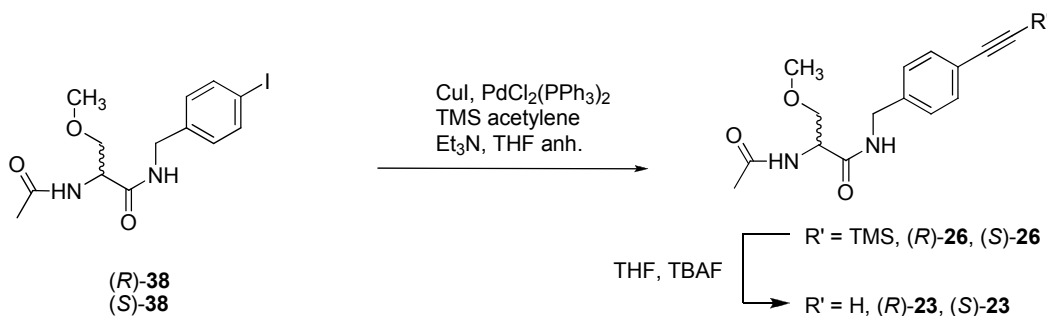

**Preparation of (*R*)-*N*-(4'-(Trimethylsilyl)ethynyl)benzyl 2-Acetamido-3-methoxypropionamide ((*R*)-26).** To an anhydrous THF (70 mL) solution of (*R*)-*N*-(4'-iodo)benzyl 2-acetamido-3-methoxypropionamide ((*R*)-38) (2.40 g, 6.4 mmol), triethylamine (1.79 mL, 12.8 mmol), trimethylsilylacetylene (1.35 mL, 9.6

## Supporting Information

mmol), dichlorobis(triphenylphosphine)palladium (II) (224 mg, 0.32 mmol), and CuI (121 mg, 0.64 mmol) were sequentially added under Ar. The mixture was stirred at room temperature (4 h), and then Et<sub>2</sub>O added and the precipitate filtered through a Celite pad. The filtrate was concentrated in vacuo and the residue was purified by flash chromatography on silica gel with EtOAc/MeOH (9/1) as the eluant to obtain (*R*)-*N*-(4'-(trimethylsilyl)ethynylbenzyl 2-acetamido-3-methoxypropionamide (1.50 g, 68%). The desired product (1.50 g) was purified with 7.50 g of resin scavenger (PhosPhonics, cat# SPM32) to remove the traces of palladium to obtain 1.20 mg (55%) of as a brown solid:  $R_f = 0.41$  (EtOAc); mp 126–127 °C;  $[\alpha]_D^{24} = +6.1^\circ$  ( $c$  1.0, DMSO); IR (nujol) 3285, 2157, 1641, 1546, 1457, 1375, 1302, 1248, 1130, 975, 862, 723 cm<sup>-1</sup>; <sup>1</sup>H NMR (CDCl<sub>3</sub>)  $\delta$  0.24 (s, (CH<sub>3</sub>)<sub>3</sub>Si), 1.99 (s, CH<sub>3</sub>CO), 3.35 (s, OCH<sub>3</sub>), 3.45 (dd,  $J = 7.2, 9.0$  Hz, CHH'), 3.75 (dd,  $J = 4.2, 9.0$  Hz, CHH'), 4.33–4.47 (m, CH<sub>2</sub>N), 4.57–4.62 (m, NC(H)CO), 6.66 (br d,  $J = 6.9$  Hz, NHC(O)CH<sub>3</sub>), 7.07–7.13 (br t, CH<sub>2</sub>NH), 7.17 (d,  $J = 7.9$  Hz, 2 ArH), 7.40 (d,  $J = 7.9$  Hz, 2 ArH), addition of excess (*R*)-(-)-mandelic acid to a CDCl<sub>3</sub> solution of (*R*)-*N*-(4'-(trimethylsilyl)ethynylbenzyl 2-acetamido-3-methoxypropionamide gave only one signal for the acetyl methyl and one signal for the ether methyl protons; <sup>13</sup>C NMR (CDCl<sub>3</sub>)  $\delta$  -0.1 (CH<sub>3</sub>)<sub>3</sub>Si), 23.2 (CH<sub>3</sub>CO), 43.2 (CH<sub>2</sub>N), 52.4 (CHCH<sub>2</sub>), 59.1 (OCH<sub>3</sub>), 71.6 (CH<sub>2</sub>OCH<sub>3</sub>), 94.4 (C≡C), 104.7 (C≡C), 122.4, 127.2, 132.3, 138.3 (4 ArC), 170.0, 170.3 (2 C(O)); HRMS (M+Na<sup>+</sup>)(ESI<sup>+</sup>) 369.1605 [M + Na<sup>+</sup>] (calcd for C<sub>18</sub>H<sub>26</sub>N<sub>2</sub>O<sub>3</sub>SiNa<sup>+</sup> 369.01610); Anal. Calcd. for C<sub>18</sub>H<sub>26</sub>N<sub>2</sub>O<sub>3</sub>Si: C, 62.39; H, 7.56; N, 8.08; Found: C, 62.41; H, 7.60; N, 7.99.

**Preparation of (*S*)-*N*-(4'-(Trimethylsilyl)ethynylbenzyl 2-Acetamido-3-methoxypropionamide ((*S*)-26).** Employing the preceding procedure and using (*S*)-*N*-(4'-iodo)benzyl 2-acetamido-3-methoxypropionamide (2.40 g, 6.4 mmol), triethylamine (1.79 mL, 12.8 mmol), CuI (121 mg, 0.64 mmol), dichlorobis(triphenylphosphine)palladium (II) (224 mg, 0.32 mmol), and trimethylsilylacetylene (1.35 mL, 9.6 mmol) gave 1.97 g (91%) of (*S*)-*N*-(4'-(trimethylsilyl)ethynylbenzyl 2-acetamido-3-methoxypropionamide as a brown

## Supporting Information

solid:  $R_f = 0.41$  (EtOAc); mp 126–127 °C;  $[\alpha]_D^{24} = -6.2^\circ$  ( $c$  1.0, DMSO); IR (nujol) 3285, 2727, 2157, 1641, 1546, 1457, 1374, 1304, 1250, 1137, 862, 725  $\text{cm}^{-1}$ ;  $^1\text{H}$  NMR (DMSO- $d_6$ )  $\delta$  0.22 (s,  $(\text{CH}_3)_3\text{Si}$ ), 1.87 (s,  $\text{CH}_3\text{CO}$ ), 3.25 (s,  $\text{OCH}_3$ ), 3.44–3.55 (m,  $\text{CHH}'$ ,  $\text{CHH}'$ ), 4.29 (d,  $J = 5.7$  Hz,  $\text{CH}_2\text{N}$ ), 4.43–4.51 (m,  $\text{NC}(\text{H})\text{CO}$ ), 7.24 (d,  $J = 8.2$  Hz, 2 ArH), 7.40 (d,  $J = 8.2$  Hz, 2 ArH), 8.10 (br d,  $J = 8.1$  Hz,  $\text{NHC}(\text{O})\text{CH}_3$ ), 8.53 (br t,  $J = 6.0$  Hz,  $\text{CH}_2\text{NH}$ ), addition of excess (*R*)-(-)-mandelic acid to a  $\text{CDCl}_3$  solution of (*S*)-*N*-(4'-(trimethylsilyl)ethynylbenzyl 2-acetamido-3-methoxypropionamide gave only one signal for the acetyl methyl and one signal for the ether methyl protons;  $^{13}\text{C}$  NMR (DMSO- $d_6$ )  $\delta$  -0.2 ( $(\text{CH}_3)_3\text{Si}$ ), 22.4 ( $\text{CH}_3\text{CO}$ ), 41.7 ( $\text{CH}_2\text{N}$ ), 52.6 ( $\text{CHCH}_2$ ), 58.1 ( $\text{OCH}_3$ ), 71.9 ( $\text{CH}_2\text{OCH}_3$ ), 93.6 ( $\text{C}\equiv\text{C}$ ), 105.1 ( $\text{C}\equiv\text{C}$ ), 120.0, 127.1, 131.4, 140.4 (4 ArC), 169.3, 169.8 (2 C(O)); HRMS ( $\text{M}+\text{Na}^+$ )(ESI $^+$ ) 369.1603 [ $\text{M} + \text{Na}^+$ ] (calcd for  $\text{C}_{18}\text{H}_{26}\text{N}_2\text{O}_3\text{SiNa}^+$  369.01610); Anal. Calcd. for  $\text{C}_{18}\text{H}_{26}\text{N}_2\text{O}_3\text{Si}$ : C, 62.39; H, 7.56; N, 8.08. Found: C, 62.10; H, 7.67; N, 7.93.

**Preparation of (*R*)-*N*-(4'-Ethynyl)benzyl 2-Acetamido-3-methoxypropionamide ((*R*)-**23**).** A 1 M THF solution of TBAF (8.66 mL, 8.66 mmol) was added to a THF (60 mL) solution (*R*)-*N*-(4'-(trimethylsilyl)ethynylbenzyl 2-acetamido-3-methoxypropionamide (1.50 g, 4.33 mmol) and then the solution was stirred at room temperature (4 h).  $\text{CH}_2\text{Cl}_2$  and an aqueous 10% citric acid solution were added and the organic layer was separated. The aqueous layer was washed with  $\text{CH}_2\text{Cl}_2$  (2 x 30 mL). The organic layers were combined, dried ( $\text{MgSO}_4$ ), and concentrated in vacuo. The residue was purified by flash chromatography on silica gel with EtOAc as the eluant to obtain (*R*)-*N*-(4'-ethynyl)benzyl 2-acetamido-3-methoxypropionamide (0.81 g, 68%) as a white solid:  $R_f = 0.41$  (EtOAc); mp 161–162 °C;  $[\alpha]_D^{24} = +4.2^\circ$  ( $c$  0.5, DMSO); IR (nujol) 3290, 1634, 1544, 1458, 1375, 1311, 1240, 1197, 1104, 1041, 714  $\text{cm}^{-1}$ ;  $^1\text{H}$  NMR ( $\text{CDCl}_3$ )  $\delta$  2.02 (s,  $\text{CH}_3\text{CO}$ ), 3.07 (s,  $\text{C}\equiv\text{CH}$ ), 3.37 (s,  $\text{OCH}_3$ ), 3.45 (dd,  $J = 7.2, 9.3$  Hz,  $\text{CHH}'$ ), 3.77 (dd,  $J = 4.5, 9.3$  Hz,  $\text{CHH}'$ ), 4.36–4.49 (m,  $\text{CH}_2\text{N}$ ), 4.56–4.63 (m,  $\text{NC}(\text{H})\text{CO}$ ), 6.60 (br d,  $J = 6.9$  Hz,  $\text{NHC}(\text{O})\text{CH}_3$ ), 7.01–7.10 (br t,  $\text{CH}_2\text{NH}$ ), 7.20 (d,  $J = 8.2$  Hz, 2 ArH), 7.44 (d,  $J = 8.2$  Hz, 2 ArH), addition of

## Supporting Information

excess (*R*)-(-)-mandelic acid to a CDCl<sub>3</sub> solution of (*R*)-*N*-(4'-ethynyl)benzyl 2-acetamido-3-methoxypropionamide gave only one signal for the acetyl methyl and one signal for the ether methyl protons; <sup>13</sup>C NMR (CDCl<sub>3</sub>) δ 23.1 (CH<sub>3</sub>CO), 43.1 (CH<sub>2</sub>N), 52.5 (CHCH<sub>2</sub>), 59.0 (OCH<sub>3</sub>), 71.7 (CH<sub>2</sub>OCH<sub>3</sub>), 77.3 (C≡C), 82.2(C≡C), 121.2, 127.3, 132.4, 138.7 (4 ArC), 170.1, 170.4 (2 C(O)); HRMS (M+Na<sup>+</sup>)(ESI<sup>+</sup>) 297.1210 [M + Na<sup>+</sup>] (calcd for C<sub>15</sub>H<sub>18</sub>N<sub>2</sub>O<sub>3</sub>Na<sup>+</sup> 297.1215); Anal. Calcd. for C<sub>15</sub>H<sub>18</sub>N<sub>2</sub>O<sub>3</sub>: C, 65.68; H, 6.61; N, 10.21. Found: C, 65.39; H, 6.58; N, 10.08.

**Preparation of (*S*)-*N*-(4'-ethynyl)benzyl 2-Acetamido-3-methoxypropionamide ((*S*)-23).** Employing the preceding procedure and using (*S*)-*N*-(4'- (trimethylsilyl)ethynyl)benzyl 2-acetamido-3-methoxypropionamide (50 mg, 0.145 mmol), and TBAF (290 μL, 0.290 mmol) gave 753 mg (91%) of (*S*)-*N*-(4'-ethynyl)benzyl 2-acetamido-3-methoxypropionamide as a white solid: *R*<sub>f</sub> = 0.41 (EtOAc); mp 159–160 °C; [α]<sub>D</sub><sup>24</sup> = -4.4° (c 0.5, DMSO); IR (nujol) 3289, 2728, 1635, 1544, 1458, 1375, 1304, 1234, 975, 724 cm<sup>-1</sup>; <sup>1</sup>H NMR (CDCl<sub>3</sub>) δ 2.03 (s, CH<sub>3</sub>CO), 3.07 (s, C≡CH), 3.38 (s, OCH<sub>3</sub>), 3.44 (dd, *J* = 7.5, 9.0 Hz, CHH'), 3.80 (dd, *J* = 4.2, 9.0 Hz, CHH'), 4.41–4.51 (m, CH<sub>2</sub>N), 4.52–4.57 (m, NC(H)CO), 6.46 (br d, *J* = 5.4 Hz, NHC(O)CH<sub>3</sub>), 6.80–6.92 (br t, CH<sub>2</sub>NH), 7.21 (d, *J* = 8.4 Hz, 2 ArH), 7.45 (d, *J* = 8.4 Hz, 2 ArH); <sup>1</sup>H NMR (DMSO-*d*<sub>6</sub>) δ 1.87 (s, CH<sub>3</sub>CO), 3.25 (s, OCH<sub>3</sub>), 3.44–3.55 (m, CHH', CHH'), 4.14 (s, C≡CH), 4.29 (d, *J* = 6.0 Hz, CH<sub>2</sub>N), 4.43–4.48 (m, NC(H)CO), 7.25 (d, *J* = 8.4 Hz, 2 ArH), 7.42 (d, *J* = 8.4 Hz, 2 ArH), 8.11 (br d, *J* = 7.8 Hz, NHC(O)CH<sub>3</sub>), 8.52 (br t, *J* = 6.0 Hz CH<sub>2</sub>NH), addition of excess (*R*)-(-)-mandelic acid to a CDCl<sub>3</sub> solution of (*S*)-*N*-(4'-ethynyl)benzyl 2-acetamido-3-methoxypropionamide gave only one signal for the acetyl methyl and one signal for the ether methyl protons; <sup>13</sup>C NMR (CDCl<sub>3</sub>) δ 23.2 (CH<sub>3</sub>C(O)), 43.2 (CH<sub>2</sub>N), 52.5 (CHCH<sub>2</sub>), 59.1 (OCH<sub>3</sub>), 71.7 (CH<sub>2</sub>OCH<sub>3</sub>), 77.3 (C≡C), 83.3 (C≡C), 121.2, 127.3, 132.4, 138.8 (4 ArC), 170.1, 170.4 (2 C(O)), HMQC experiment showed a correlation between the δ 3.07 signal in the <sup>1</sup>H NMR and the δ 77.3 peak in the <sup>13</sup>C NMR; <sup>13</sup>C NMR (DMSO-*d*<sub>6</sub>) δ 22.3



## Supporting Information

(CH<sub>3</sub>C(O)), 41.6 (CH<sub>2</sub>N), 52.4 (CHCH<sub>2</sub>), 58.0 (OCH<sub>3</sub>), 71.8 (CH<sub>2</sub>OCH<sub>3</sub>), 80.2 (C≡C), 83.2 (C≡C), 119.8, 126.9, 131.3, 140.2 (4 ArC), 169.2, 169.6 (2 C(O)), HMQC experiment showed a correlation between the δ 4.14 signal in the <sup>1</sup>H NMR and the δ 80.2 peak in the <sup>13</sup>C NMR; HRMS (M+Na<sup>+</sup>)(ESI<sup>+</sup>) 297.1212 [M + Na<sup>+</sup>] (calcd for C<sub>15</sub>H<sub>18</sub>N<sub>2</sub>O<sub>3</sub>Na<sup>+</sup> 297.1215); Anal. Calcd. for C<sub>15</sub>H<sub>18</sub>N<sub>2</sub>O<sub>3</sub>•0.25 H<sub>2</sub>O: C, 64.62; H, 6.69; N, 10.05. Found: C, 64.60; H, 6.57; N, 9.99.

### 18. Preparation of (*R*)-*N*-(4'-(Prop-1-ynyl))benzyl 2-Acetamido-3-methoxypropionamide ((*R*)-24).

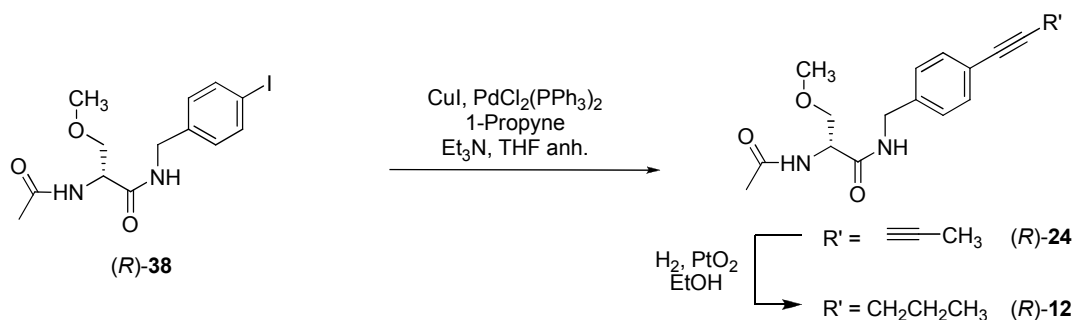

**Preparation of (*R*)-*N*-(4'-(Prop-1-ynyl))benzyl 2-Acetamido-3-methoxypropionamide ((*R*)-24).** To an anhydrous triethylamine solution (0.1 M, 2.66 mL) of (*R*)-*N*-(4'-iodo)benzyl 2-acetamido-3-methoxypropionamide ((*R*)-38) (100 mg, 0.266 mmol), dichlorobis(triphenylphosphine)palladium (II) (19 mg, 0.026 mmol), and CuI (2.5 mg, 0.013 mmol) were sequentially added to a flame-dried Schlenk tube under Ar. The mixture was cooled down to -78 °C, and then the reaction vessel was evacuated and propyne was bubbled into the triethylamine solution until the solution reached ~ 1 atm. The mixture was stirred at room temperature (16 h). The mixture was cooled to -78 °C and re-evacuated. A balloon of propyne was bubbled into the mixture and the reaction was stirred at room temperature (24 h). The reaction mixture was concentrated in vacuo and the residue was purified by flash chromatography on silica gel with

## Supporting Information

EtOAc/hexanes (5/5 to 10/0) as the eluant to obtain (*R*)-*N*-(4'-(prop-1-ynyl))benzyl 2-acetamido-3-methoxypropionamide (70 mg, 92%) as a white solid. The desired product (60 mg) was purified with 340 mg of resin scavenger (PhosPhonics, cat# SPM32) to remove the traces of palladium to obtain 50 mg (66%) of (*R*)-*N*-(4'-(prop-1-ynyl))benzyl 2-acetamido-3-methoxypropionamide:  $R_f$  = 0.37 (EtOAc); mp 178–180 °C;  $[\alpha]^{24.3}_D = -18.0^\circ$  ( $c$  0.5, CHCl<sub>3</sub>); IR (nujol) 3474, 3273, 2960, 2856, 1683, 1550, 1457, 1375, 1299, 1125, 978, 811, 724 cm<sup>-1</sup>; <sup>1</sup>H NMR (CDCl<sub>3</sub>)  $\delta$  2.04 (s, CH<sub>3</sub>CO), 2.05 (s, CH<sub>3</sub>), 3.38–3.45 (m, CHH', OCH<sub>3</sub>), 3.81 (dd,  $J$  = 4.2, 9.3 Hz, CHH'), 4.39–4.50 (m, CH<sub>2</sub>N), 4.51–4.57 (m, NC(H)CO), 6.39–6.45 (br d, CHNH), 6.71–6.79 (br t, CH<sub>2</sub>NH), 7.17 (d,  $J$  = 8.1 Hz, 2 ArH), 7.35 (d,  $J$  = 8.1 Hz, 2 ArH), addition of excess (*R*)-(-)-mandelic acid to a CDCl<sub>3</sub> solution of (*R*)-*N*-(4'-(prop-1-ynyl))benzyl 2-acetamido-3-methoxypropionamide gave only one signal for the acetyl methyl and one signal for the ether methyl protons; <sup>13</sup>C NMR (CDCl<sub>3</sub>)  $\delta$  4.33 (CH<sub>3</sub>), 23.2 (CH<sub>3</sub>CO), 43.3 (CH<sub>2</sub>N), 52.4 (CHCH<sub>2</sub>), 59.1 (OCH<sub>3</sub>), 71.7 (CH<sub>2</sub>OCH<sub>3</sub>), 79.4 (C $\equiv$ C), 86.1 (C $\equiv$ C), 123.2, 127.3, 131.8, 137.3 (4 ArC), 170.0, 170.3 (2 C(O)); HRMS ( $M+H^+$ )(ESI<sup>+</sup>) 311.1372 [ $M + H^+$ ] (calcd for C<sub>16</sub>H<sub>20</sub>N<sub>2</sub>O<sub>3</sub>H<sup>+</sup> 311.1372); Anal. Calcd. for C<sub>16</sub>H<sub>20</sub>N<sub>2</sub>O<sub>3</sub>·0.2H<sub>2</sub>O: C, 65.62; H, 7.06; N, 9.57. Found: C, 65.98; H, 7.02; N, 9.17.

### 19. Preparation of (*R*)-*N*-(4'-(3,3-Dimethylbut-1-ynyl))benzyl 2-Acetamido-3-methoxypropionamide ((*R*)-25).

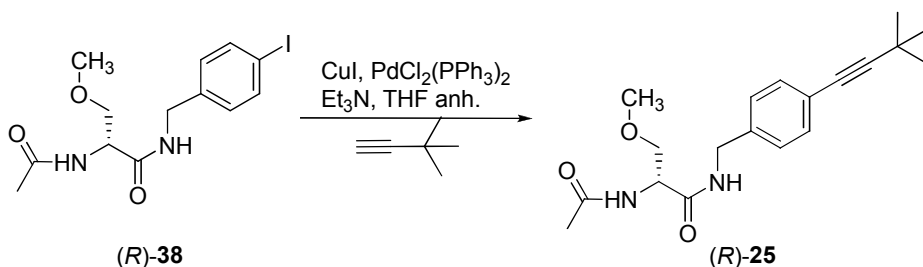

**Preparation of (*R*)-*N*-(4'-(3,3-Dimethylbut-1-ynyl))benzyl 2-Acetamido-3-methoxypropionamide ((*R*)-25).** To an anhydrous THF (10 mL) solution of

## Supporting Information

(*R*)-*N*-(4'-iodo)benzyl 2-acetamido-3-methoxypropionamide ((*R*)-**38**) (376 mg, 1.0 mmol), triethylamine (280  $\mu$ L, 2.0 mmol), 3,3-dimethylbut-1-yne (182  $\mu$ L, 1.5 mmol), dichlorobis(triphenylphosphine)palladium (II) (35 mg, 0.05 mmol), and CuI (19 mg, 0.1 mmol) were sequentially added under Ar. The mixture was stirred at room temperature (4 h), and then Et<sub>2</sub>O (10 mL) added and the precipitate filtered through a Celite pad. The filtrate was concentrated in vacuo and the residue was purified by flash chromatography on silica gel with EtOAc/MeOH (9/1) as the eluant to obtain (*R*)-*N*-(4'-(3,3-dimethylbut-1-ynyl))benzyl 2-acetamido-3-methoxypropionamide (220 mg, 66%) as a brown solid:  $R_f = 0.22$  (EtOAc); mp 120–121 °C;  $[\alpha]_D^{25} = +4.8^\circ$  ( $c$  1.0, DMSO); IR (nujol) 3287, 2727, 2364, 1641, 1547, 1458, 1375, 1297, 1132, 972, 816, 724  $\text{cm}^{-1}$ ; <sup>1</sup>H NMR (CDCl<sub>3</sub>)  $\delta$  1.31 (s, (CH<sub>3</sub>)<sub>3</sub>C), 2.00 (s, CH<sub>3</sub>CO), 3.35 (s, OCH<sub>3</sub>), 3.42 (dd,  $J = 7.5, 9.0$  Hz, CHH'), 3.76 (dd,  $J = 4.2, 9.0$  Hz, CHH'), 4.33–4.50 (m, CH<sub>2</sub>N), 4.50–4.61 (m, NC(H)CO), 6.60 (d,  $J = 6.3$  Hz, CHNH), 6.91–6.99 (br t, CH<sub>2</sub>NH), 7.14 (d,  $J = 8.1$  Hz, 2 ArH), 7.33 (d,  $J = 8.1$  Hz, 2 ArH), addition of excess (*R*)-(-)-mandelic acid to a CDCl<sub>3</sub> solution of (*R*)-*N*-(4'-(3,3-dimethylbut-1-ynyl))benzyl 2-acetamido-3-methoxypropionamide gave only one signal for the acetyl methyl and one signal for the ether methyl protons; <sup>13</sup>C NMR (CDCl<sub>3</sub>)  $\delta$  23.2 (CH<sub>3</sub>CO), 27.9 (C(CH<sub>3</sub>)<sub>3</sub>), 31.0 (C(CH<sub>3</sub>)<sub>3</sub>), 43.3 (CH<sub>2</sub>N), 52.5 (CHCH<sub>2</sub>), 59.1 (OCH<sub>3</sub>), 71.8 (CH<sub>2</sub>OCH<sub>3</sub>), 78.6 (C≡C), 98.8 (C≡C), 123.3, 127.2, 131.8, 137.1 (4 ArC), 170.2, 170.6 (2 C(O)); HRMS (M+H<sup>+</sup>)(ESI<sup>+</sup>) 331.2019 [M + H<sup>+</sup>] (calcd for C<sub>19</sub>H<sub>26</sub>N<sub>2</sub>O<sub>3</sub>H<sup>+</sup> 331.2021); Anal. Calcd. for C<sub>19</sub>H<sub>26</sub>N<sub>2</sub>O<sub>3</sub>•0.2 H<sub>2</sub>O: C, 68.32; H, 7.97; N, 8.39. Found: C, 68.25; H, 7.96; N, 8.33.

### 20. Preparation of (*R*)-*N*-(4'-(3-Methoxyprop-1-ynyl))benzyl 2-Acetamido-3-methoxypropionamide ((*R*)-**27**).

## Supporting Information

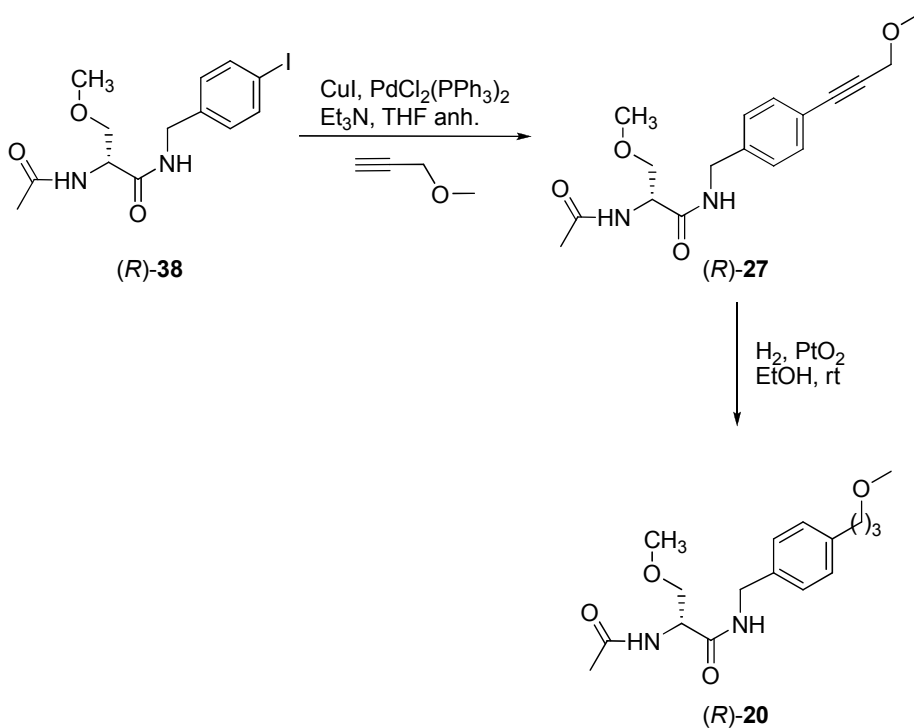

**Preparation of (*R*)-*N*-(4'-(3-Methoxyprop-1-ynyl))benzyl 2-Acetamido-3-methoxypropionamide ((*R*)-27).** To an anhydrous THF (10 mL) solution (*R*)-*N*-(4'-iodo)benzyl 2-acetamido-3-methoxypropionamide (376 mg, 1.0 mmol), triethylamine (280  $\mu\text{L}$ , 2.0 mmol), 3-methoxyprop-1-yne (125  $\mu\text{L}$ , 1.5 mmol), dichlorobis(triphenylphosphine)palladium (II) (70 mg, 0.1 mmol), and CuI (38 mg, 0.2 mmol) were sequentially added under Ar. The mixture was stirred at room temperature (4 h), and then Et<sub>2</sub>O (10 mL) was added and the precipitate filtered through a Celite pad. The filtrate was concentrated in vacuo and the residue was purified by flash chromatography on silica gel with EtOAc/MeOH (9/1) as the eluant to obtain (*R*)-*N*-(4'-(3-methoxyprop-1-ynyl))benzyl 2-acetamido-3-methoxypropionamide (260 mg, 82%) as a beige solid:  $R_f = 0.27$  (EtOAc); mp 141–142 °C;  $[\alpha]_D^{27} = +4.4^\circ$  ( $c$  1.0, DMSO); IR (nujol) 3278, 3096, 1640, 1554, 1458, 1370, 1304, 1257, 1192, 1099, 966, 903, 810, 732  $\text{cm}^{-1}$ ; <sup>1</sup>H NMR (CDCl<sub>3</sub>)  $\delta$  2.02 (s, CH<sub>3</sub>CO), 3.37 (s, OCH<sub>3</sub>), 3.45–3.47 (m, CHH', OCH<sub>3</sub>), 3.78 (dd,  $J = 4.2, 9.0$  Hz, CHH'), 4.32 (s, C $\equiv$ CCH<sub>2</sub>OCH<sub>3</sub>), 4.38–4.52 (m, CH<sub>2</sub>N), 4.54–4.61 (m, NC(H)CO), 6.52 (d,  $J = 6.6$  Hz, CHNH), 6.91–6.99 (br t, CH<sub>2</sub>NH), 7.19 (d,  $J = 7.9$  Hz, 2 ArH), 7.41 (d,  $J = 7.9$  Hz, 2 ArH), addition of excess (*R*)-(-)-mandelic acid

## Supporting Information

to a  $\text{CDCl}_3$  solution of (*R*)-*N*-(4'-(3-methoxyprop-1-ynyl))benzyl 2-acetamido-3-methoxypropionamide gave only one signal for the acetyl methyl and one signal for the ether methyl protons;  $^{13}\text{C}$  NMR ( $\text{CDCl}_3$ )  $\delta$  23.2 ( $\text{CH}_3\text{CO}$ ), 43.2 ( $\text{CH}_2\text{N}$ ), 52.5 ( $\text{CHCH}_2$ ), 57.7 ( $\text{C}\equiv\text{CCH}_2\text{OCH}_3$ ), 59.1 ( $\text{OCH}_3$ ), 60.4 ( $\text{C}\equiv\text{CCH}_2\text{OCH}_3$ ), 71.7 ( $\text{CH}_2\text{OCH}_3$ ), 85.2 ( $\text{C}\equiv\text{C}$ ), 86.0 ( $\text{C}\equiv\text{C}$ ), 121.8, 127.3, 132.1, 138.4 ( $\text{C}_6\text{H}_4$ ), 170.4 (br d, 2  $\text{C}(\text{O})$ ); HRMS ( $\text{M}+\text{H}^+$ )(ESI $^+$ ) 319.1652 [ $\text{M} + \text{H}^+$ ] (calcd for  $\text{C}_{17}\text{H}_{22}\text{N}_2\text{O}_4\text{H}^+$  319.1658); Anal. Calcd. for  $\text{C}_{17}\text{H}_{22}\text{N}_2\text{O}_4 \cdot 0.33 \text{H}_2\text{O}$ : C, 62.95; H, 7.04; N, 8.64. Found: C, 62.98; H, 6.78; N, 8.47.

### 21. Preparation of (*R*)- and (*S*)-*N*-(4'-Cyano)benzyl 2-Acetamido-3-methoxypropionamide ((*R*)- and (*S*)-28).

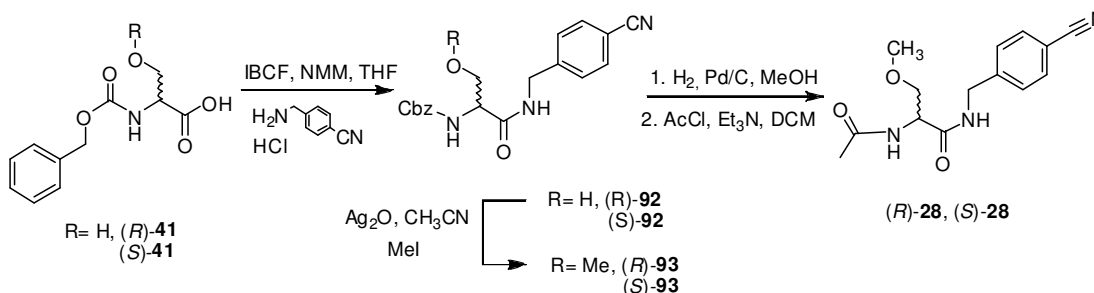

#### Preparation of (*R*)-*N*-(4'-Cyano)benzyl 2-*N*-

(Benzyloxycarbonyl)amino-3-hydroxypropionamide ((*R*)-92). A THF solution (150 mL) of (*R*)-Cbz-serine (4.71 g, 19.7 mmol) was stirred and cooled at  $-78^\circ\text{C}$  under Ar and then 4-methylmorpholine (NMM) (2.6 mL, 23.6 mmol) was added dropwise. After 2 min of stirring at this temperature, the isobutylchloroformate (IBCF) (3.1 mL, 23.6 mmol) was added dropwise leading to the precipitation of a white solid, and the reaction was allowed to proceed for additional 2 min. A heterogenous THF (75 mL) mixture of 4-aminomethylbenzonitrile hydrochloride (3.55 g, 22.0 mmol), NMM (2.6 mL, 23.6 mmol) was added portionwise at  $-78^\circ\text{C}$ . The mixture was allowed to stir at room temperature (2 h). The white solid was filtrated and the organic layer was concentrated in vacuo. The residue was triturated with EtOAc resulting in a white solid that was filtered and recrystallized with EtOAc to give (*R*)-*N*-(4'-cyano)benzyl 2-*N*-(benzyloxycarbonyl)amino-3-

## Supporting Information

hydroxypropionamide as a white solid (4.03 g, 56%):  $R_f = 0.25$  (EtOAc); mp 146–147 °C;  $[\alpha]_D^{24} -3.9^\circ$  (c 4, DMSO); IR (nujol) 3283, 2229, 1638, 1643, 1567, 1521, 1458, 1375, 1311, 1242, 1025, 747  $\text{cm}^{-1}$ ;  $^1\text{H}$  NMR (DMSO- $d_6$ )  $\delta$  3.60–3.66 (m,  $\text{CH}_2\text{OH}$ ), 4.11 (q,  $J = 7.5$  Hz, NCH), 4.38 (d,  $J = 5.6$  Hz,  $\text{NCH}_2$ ), 4.93–4.96 (br m, OH), 5.06 (s,  $\text{CH}_2\text{O}$ ), 7.29–7.37 (m, NH, 5 ArH), 7.45 (d,  $J = 8.1$  Hz, 2 ArH), 7.76 (d,  $J = 8.1$  Hz, 2 ArH), 8.58 (t,  $J = 5.6$  Hz, NH);  $^{13}\text{C}$  NMR (DMSO- $d_6$ )  $\delta$  41.8 ( $\text{NCH}_2$ ), 57.3 ( $\text{OCH}_2\text{CH}$ ), 61.5 ( $\text{OCH}_2\text{CH}$ ), 65.5 ( $\text{CH}_2\text{O}$ ), 109.3 (CCN), 118.9 (CN), 127.7, 128.2, 132.0, 136.9, 145.4 (5 ArC), 155.9 (NC(O)O), 170.5 (C(O)), the remaining aromatic peaks were not detected and are believed to overlap with the observed signals; HRMS ( $\text{M}+\text{Na}^+$ )(ESI $^+$ ) 354.1451 [ $\text{M} + \text{H}^+$ ] (calcd for  $\text{C}_{19}\text{H}_{19}\text{N}_3\text{O}_4\text{H}^+$  354.1454); Anal. Calcd. for  $\text{C}_{19}\text{H}_{19}\text{N}_3\text{O}_4 \cdot 0.25\text{H}_2\text{O}$ : C, 63.77; H, 5.49; N, 11.74. Found: C, 64.01; H, 5.37; N, 11.73.

### Preparation of (S)-N-(4'-Cyano)benzyl 2-N-

**(Benzyloxycarbonyl)amino-3-hydroxypropionamide ((S)-92).** Employing the preceding procedure and using (S)-Cbz-serine (4.71 g, 19.7 mmol), NMM (5.2 mL, 47.2 mmol), IBCF (3.1 mL, 23.6 mmol), 4-aminomethylbenzonitrile hydrochloride (3.55 g, 22.0 mmol), and THF (225 mL) gave 4.05 g (56%) of (S)-N-(4'-cyano)benzyl 2-N-(benzyloxycarbonyl)amino-3-hydroxypropionamide as a white solid:  $R_f = 0.25$  (EtOAc); mp 146–147 °C;  $[\alpha]_D^{21} +3.9^\circ$  (c 4, DMSO); IR (nujol) 3283, 2229, 1639, 1643, 1567, 1521, 1458, 1375, 1311, 1243, 1025  $\text{cm}^{-1}$ ;  $^1\text{H}$  NMR (DMSO- $d_6$ )  $\delta$  3.57–3.67 (m,  $\text{CHH}'\text{OH}$ ), 4.10 (q,  $J = 7.5$  Hz, NCH), 4.38 (d,  $J = 5.9$  Hz,  $\text{NCH}_2$ ), 4.95 (br t,  $J = 5.4$  Hz, OH), 5.05 (d,  $J = 12.6$  Hz,  $\text{CHH}'\text{O}$ ), 5.07 (d,  $J = 12.6$  Hz,  $\text{CHH}'\text{O}$ ), 7.29–7.37 (m, NH, 5 ArH), 7.45 (d,  $J = 8.1$  Hz, 2 ArH), 7.76 (d,  $J = 8.1$  Hz, 2 ArH), 8.58 (br t,  $J = 5.9$  Hz, NH);  $^{13}\text{C}$  NMR (DMSO- $d_6$ )  $\delta$  42.5 ( $\text{NCH}_2$ ), 58.0 ( $\text{OCH}_2\text{CH}$ ), 62.3 ( $\text{OCH}_2\text{CH}$ ), 66.2 ( $\text{CH}_2\text{O}$ ), 110.0 (CCN), 119.5 (CN), 128.4, 128.9, 132.7, 137.5, 146.0 (5 Ar), 156.6 (NC(O)O), 171.2 (C(O)), the remaining aromatic peaks were not detected and are believed to overlap with the observed signals; HRMS ( $\text{M}+\text{Na}^+$ )(ESI $^+$ ) 354.1449 [ $\text{M} + \text{H}^+$ ] (calcd for  $\text{C}_{19}\text{H}_{19}\text{N}_3\text{O}_4\text{H}^+$  354.1454); Anal. Calcd. for  $\text{C}_{19}\text{H}_{19}\text{N}_3\text{O}_4$ : C, 64.58; H, 5.42; N, 11.89. Found: C, 64.20; H, 5.38; N, 11.70.

## Supporting Information

### Preparation of (*R*)-*N*-(4'-Cyano)benzyl 2-*N*-

**(Benzyloxycarbonyl)amino-3-methoxypropionamide ((*R*)-93).** Ag<sub>2</sub>O (6.36 g, 27.55 mmol) was added to a CH<sub>3</sub>CN solution (100 mL) of (*R*)-*N*-(4'-cyano)benzyl 2-*N*-(benzyloxycarbonyl)amino-3-hydroxypropionamide (2.00 g, 5.51 mmol) and then CH<sub>3</sub>I (3.5 mL, 55.1 mmol) was added at room temperature under Ar. The reaction mixture was stirred at room temperature (3 d), filtered through a pad of Celite<sup>®</sup>, and the filtrate concentrated in vacuo. The residue was purified by trituration with Et<sub>2</sub>O to obtain 1.63 g (78%) of (*R*)-*N*-(4'-cyano)benzyl 2-*N*-(benzyloxycarbonyl)amino-3-methoxypropionamide as a white solid: *R*<sub>f</sub> = 0.82 (EtOAc); mp 143–144 °C; [α]<sup>25</sup><sub>D</sub> – 6.1° (*c* 4, DMSO); IR (nujol) 3288, 2229, 1687, 1645, 1539, 1458, 1375, 1303, 1245, 1123, 1041 cm<sup>-1</sup>; <sup>1</sup>H NMR (CDCl<sub>3</sub>) δ 3.33 (s, OCH<sub>3</sub>), 3.48 (dd, *J* = 6.0, 9.1 Hz, CHH'), 3.82 (dd, *J* = 3.9, 9.1 Hz, CHH'), 4.34–4.37 (br m, CHCH<sub>2</sub>), 4.47 (d, *J* = 6.0 Hz, CH<sub>2</sub>N), 5.08 (s, OCH<sub>2</sub>), 5.73 (br d, *J* = 6.3 Hz, Cbz-NH), 6.98 (t, *J* = 6.0 Hz, CH<sub>2</sub>NH), 7.28–7.32 (m, 7 ArH), 7.53 (d, *J* = 8.1 Hz, 2 ArH); <sup>13</sup>C NMR (CDCl<sub>3</sub>) δ 42.8 (NCH<sub>2</sub>), 54.3 (OCH<sub>2</sub>CH), 59.0 (OCH<sub>3</sub>), 67.2 (PhCH<sub>2</sub>O), 71.8 (OCH<sub>2</sub>CH), 111.0 (CCN), 118.6 (CN), 127.7, 128.0, 128.3, 128.5 132.3, 135.8, 143.5 (7 ArC), 156.0 (NC(O)O), 170.3 (C(O)); HRMS (M+H<sup>+</sup>)(ESI<sup>+</sup>) 368.1610 [M + H<sup>+</sup>] (calcd for C<sub>20</sub>H<sub>21</sub>N<sub>3</sub>O<sub>4</sub>H<sup>+</sup> 368.1610); Anal. Calcd. for C<sub>20</sub>H<sub>21</sub>N<sub>3</sub>O<sub>4</sub>•0.25H<sub>2</sub>O: 64.59; H, 5.83; N, 11.30. Found: C, 64.61; H, 5.79; N, 11.01.

### Preparation of (*S*)-*N*-(4'-Cyano)benzyl 2-*N*-

**(Benzyloxycarbonyl)amino-3-methoxypropionamide ((*S*)-93).** Employing the preceding procedure and using (*S*)-*N*-(4'-cyano)benzyl 2-*N*-(benzyloxycarbonyl)amino-3-hydroxypropionamide (2.00 g, 5.51 mmol), Ag<sub>2</sub>O (6.36 g, 27.55 mmol), and MeI (3.5 mL, 55.1 mmol) gave 1.58 g (77%) of (*S*)-*N*-(4'-cyano)benzyl 2-*N*-(benzyloxycarbonyl)amino-3-methoxypropionamide as a white solid after trituration with Et<sub>2</sub>O: *R*<sub>f</sub> = 0.82 (EtOAc); mp 142–143 °C; [α]<sup>25</sup><sub>D</sub> +6.0° (*c* 4, DMSO); IR (nujol) 3288, 2228, 1648, 1534, 1459, 1376, 1303, 1243, 1123, 1041 cm<sup>-1</sup>; <sup>1</sup>H NMR (CDCl<sub>3</sub>) δ 3.35 (s, OCH<sub>3</sub>), 3.50 (dd, *J* = 6.0, 9.1 Hz, CHH'), 3.83 (dd, *J* = 3.9, 9.1 Hz, CHH'), 4.34–4.37 (br m, CHCH<sub>2</sub>), 4.48 (d, *J* =

## Supporting Information

6.0 Hz, CH<sub>2</sub>N), 5.09 (s, OCH<sub>2</sub>), 5.76 (d, *J* = 6.0 Hz, Cbz-NH), 7.03 (t, *J* = 6.0 Hz, CH<sub>2</sub>NH), 7.30–7.37 (m, 7 ArH), 7.55 (d, *J* = 8.1 Hz, 2 ArH); <sup>13</sup>C NMR (CDCl<sub>3</sub>) δ 42.8 (NCH<sub>2</sub>), 54.5 (OCH<sub>2</sub>CH), 59.0 (OCH<sub>3</sub>), 67.2 (PhCH<sub>2</sub>O), 71.8 (OCH<sub>2</sub>CH), 111.0 (CCN), 118.6 (CN), 127.7, 128.0, 128.3, 128.5, 132.3, 135.8, 143.5 (7 ArC), 156.1 (NC(O)O), 170.3 (C(O)); HRMS (M+H<sup>+</sup>)(ESI<sup>+</sup>) 368.1607 [M + H<sup>+</sup>] (calcd for C<sub>20</sub>H<sub>21</sub>N<sub>3</sub>O<sub>4</sub>H<sup>+</sup> 368.1610); Anal. Calcd. for C<sub>20</sub>H<sub>21</sub>N<sub>3</sub>O<sub>4</sub>•0.25H<sub>2</sub>O: 64.59; H, 5.83; N, 11.30. Found: C, 64.63; H, 5.70; N, 11.51.

**Preparation of (*R*)-*N*-(4'-Cyano)benzyl 2-Acetamido-3-methoxypropionamide ((*R*)-**28**).** A MeOH solution (150 mL) of (*R*)-*N*-(4'-cyano)benzyl 2-*N*-(benzyloxycarbonyl)amino-3-methoxypropionamide (1.80 g, 4.8 mmol) was treated with H<sub>2</sub> (1 atm) in presence of 10% Pd/C (250 mg) at room temperature (36 h). The mixture was carefully filtered through a bed of Celite<sup>®</sup> and the filtrate was evaporated in vacuo to obtain a colorless oil. The oil was dissolved in CH<sub>2</sub>Cl<sub>2</sub> (50 mL) and then triethylamine (810 μL, 5.8 mmol) and acetyl chloride (410 μL, 5.8 mmol) were carefully added at 0°C and the resulting solution was stirred at room temperature (2 h). H<sub>2</sub>O was added and the organic layer was extracted (3 x 100 mL) with CH<sub>2</sub>Cl<sub>2</sub>. The organic layers were combined, dried (MgSO<sub>4</sub>), and concentrated in vacuo. After trituration of the residue with EtOAc, 320 mg of (*R*)-*N*-(4'-cyano)benzyl 2-acetamido-3-methoxypropionamide was obtained as a white solid (42%): *R*<sub>f</sub> = 0.54 (9/1 EtOAc/MeOH); mp 168–169 °C; [α]<sub>D</sub><sup>24</sup> +4.9° (*c* 1, DMSO); IR (nujol) 3273, 2725, 2226, 1635, 1547, 1458, 1374, 1309, 1191, 1093, 907, 727 cm<sup>-1</sup>; <sup>1</sup>H NMR (DMSO-*d*<sub>6</sub>) δ 1.87 (s, CH<sub>3</sub>CO), 3.26 (s, OCH<sub>3</sub>), 3.45–3.57 (m, CH<sub>2</sub>OCH<sub>3</sub>), 4.36 (d, *J* = 6.0 Hz, CH<sub>2</sub>N), 4.43–4.49 (m, NC(H)CO), 7.42 (d, *J* = 8.6 Hz, 2 ArH), 7.34 (d, *J* = 8.6 Hz, 2 ArH), 8.14 (d, *J* = 7.8 Hz, NHC(O)CH<sub>3</sub>), 8.61 (t, *J* = 6.0 Hz, CH<sub>2</sub>NH), addition of excess (*R*)-(-)-mandelic acid to a CDCl<sub>3</sub> solution of (*R*)-*N*-(4'-cyano)benzyl 2-acetamido-3-methoxypropionamide gave only one signal for the acetyl methyl and one signal for the ether methyl protons; <sup>13</sup>C NMR (DMSO-*d*<sub>6</sub>) δ 22.4 (CH<sub>3</sub>CO), 41.7 (CH<sub>2</sub>N), 52.6 (CHCH<sub>2</sub>), 58.1 (OCH<sub>3</sub>), 71.9 (CH<sub>2</sub>OMe), 109.3 (CCN), 118.8 (CN), 127.6, 132.1, 145.3 (3 ArC), 169.4, 170.0 (2 C(O));



## Supporting Information

HRMS ( $M+Na^+$ )(ESI<sup>+</sup>) 298.1163 [ $M + Na^+$ ] (calcd for  $C_{14}H_{17}N_3O_3Na^+$  298.1168); Anal. Calcd. for  $C_{14}H_{17}N_3O_3 \cdot 0.25 H_2O$ : , C, 60.09; H, 6.30; N, 15.02. Found: C, 60.17; H, 6.22; N, 14.66.

**Preparation of (S)-N-(4'-Cyano)benzyl 2-Acetamido-3-methoxypropionamide ((S)-28).** Employing the preceding procedure and using (S)-N-(4'-cyano)benzyl 2-N-(benzyloxycarbonyl)amino-3-methoxypropionamide (1.20 g, 3.2 mmol), 10% Pd/C (250 mg), triethylamine (539  $\mu$ L, 3.8 mmol), and acetyl chloride (273  $\mu$ L, 3.8 mmol) gave 620 mg (70%) of (S)-N-(4'-cyano)benzyl 2-acetamido-3-methoxypropionamide as a white solid after trituration with EtOAc:  $R_f = 0.54$  (9/1 EtOAc/MeOH); mp 168–169 °C;  $[\alpha]_D^{25} -4.9^\circ$  ( $c$  1, DMSO); IR (nujol) 3271, 2726, 2228, 1630, 1552, 1458, 1374, 1312, 1194, 1095, 908, 729  $cm^{-1}$ ;  $^1H$  NMR ( $CDCl_3$ )  $\delta$  2.04 (s,  $CH_3CO$ ), 3.40 (s,  $OCH_3$ ), 3.45 (dd,  $J = 7.2, 9.6$  Hz,  $CHH'$ ), 3.81 (dd,  $J = 3.9, 9.6$  Hz,  $CHH'$ ), 4.49–4.61 (m,  $CH_2N$ ,  $NCHCO$ ), 6.48 (br d,  $J = 5.7$  Hz,  $NHC(O)CH_3$ ), 7.06–7.08 (br m,  $CH_2NH$ ), 7.36 (d,  $J = 8.4$  Hz, 2  $ArH$ ), 7.34 (d,  $J = 8.4$  Hz, 2  $ArH$ ), addition of excess (*R*)-(-)-mandelic acid to a  $CDCl_3$  solution of (S)-N-(4'-cyano)benzyl 2-acetamido-3-methoxypropionamide gave only one signal for the acetyl methyl and one signal for the ether methyl protons;  $^{13}C$  NMR ( $CDCl_3$ )  $\delta$  23.1 ( $CH_3CO$ ), 43.0 ( $CH_2N$ ), 52.5 ( $CHCH_2$ ), 59.1 ( $OCH_3$ ), 71.5 ( $CH_2OCH_3$ ), 111.2 ( $CCN$ ), 118.6 ( $CN$ ), 127.8, 132.4, 143.5 (3  $ArC$ ), 170.3, 170.4 (2  $C(O)$ ); HRMS ( $M+Na^+$ )(ESI<sup>+</sup>) 298.1163 [ $M + Na^+$ ] (calcd for  $C_{14}H_{17}N_3O_3Na^+$  298.1168); Anal. Calcd. for  $C_{14}H_{17}N_3O_3$ : C, 61.08; H, 6.22; N, 15.16. Found: C, 61.02; H, 6.35; N, 15.08.

**22. Preparation of (R)- and (S)-N-(4'-Formyl)benzyl 2-Acetamido-3-methoxypropionamide ((R)-and (S)-29).**

## Supporting Information

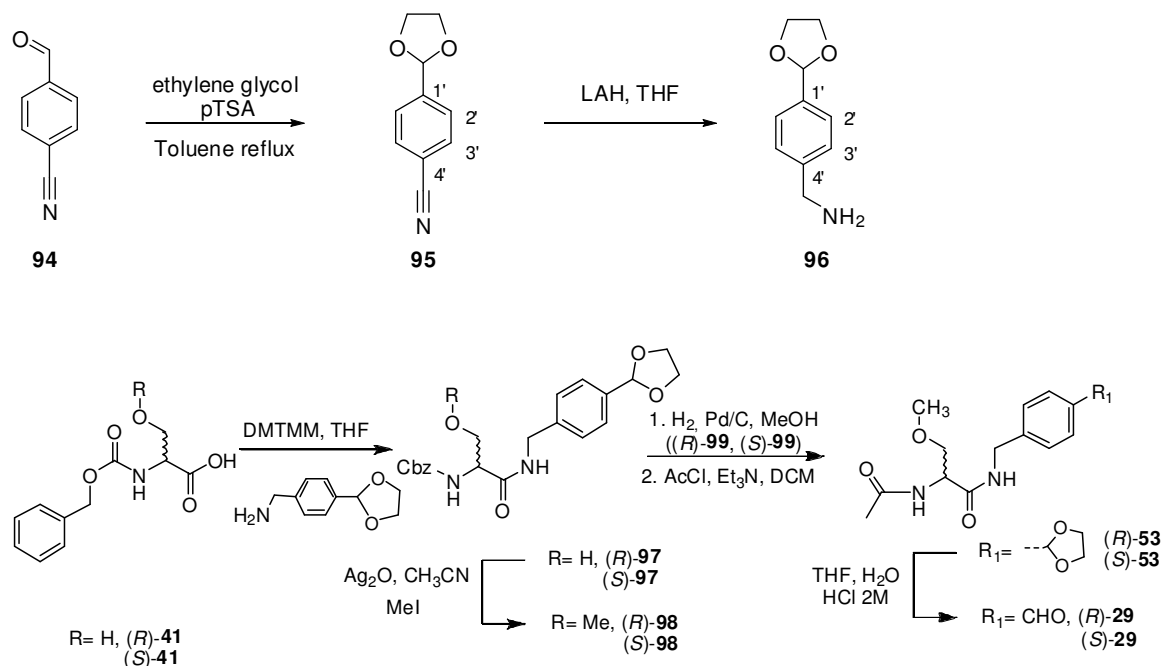

**Preparation of 4-(1,3-Dioxolan-2-yl)benzonitrile (95).<sup>6</sup>** To a toluene solution (150 mL) of (4-cyano)benzaldehyde (94) (15.00 g, 108.8 mmol) was added ethylene glycol (23.9 mL, 435.1 mmol) and pTSA (20.7 mg, 0.11 mmol). The reaction solution was heated to reflux with a Dean Stark apparatus (16 h) after which the formation of H<sub>2</sub>O ceased. The reaction solution was cooled to room temperature and successively washed with aqueous saturated NaHCO<sub>3</sub> (150 mL) and brine (2 x 75 mL). The organic layer was concentrated in vacuo to give a pale yellow residue that was recrystallized (Et<sub>2</sub>O/hexanes) to provide four crops of pure 4-(1,3-dioxolan-2-yl)benzonitrile as white flakes (17.20 g, 90%): *R<sub>f</sub>* = 0.55 (CHCl<sub>3</sub>); mp 44–45 °C (lit.<sup>6</sup> mp = 39–40 °C); <sup>1</sup>H NMR (CDCl<sub>3</sub>) δ 4.02–4.14 (m, OCH<sub>2</sub>CH<sub>2</sub>O), 5.84 (s, OCHO), 7.58 (d, *J* = 9.0 Hz, 2 C<sub>3</sub>H), 7.66 (d, *J* = 9.0 Hz, 2 C<sub>2</sub>H); <sup>13</sup>C NMR (CDCl<sub>3</sub>) δ 65.6 (OCH<sub>2</sub>CH<sub>2</sub>O), 102.6 (OCHO), 113.0 (C<sub>4</sub>-C≡N), 118.7 (C≡N), 127.3 (2 C<sub>3</sub>'), 132.4 (2 C<sub>2</sub>'), 143.3 (C<sub>1</sub>-CH(O)O).

**Preparation of (4-(1,3-Dioxolan-2-yl)phenyl)methanamine (96).<sup>6</sup>** A THF solution (60 mL) of 4-(1,3-dioxolan-2-yl)benzonitrile (23.12 g, 132 mmol) was

## Supporting Information

added dropwise to a stirred THF solution of 1.0 M LiAlH<sub>4</sub> (400 mL, 400 mmol) at 0 °C. The reaction solution was stirred at 0 °C (15 min) during which time the solution progressively turned yellow and then warmed to room temperature (15 h). The excess LiAlH<sub>4</sub> was quenched by cooling the reaction (0 °C) and successively adding H<sub>2</sub>O (12 mL), aqueous (15 %) NaOH (6 mL), and H<sub>2</sub>O (12 mL), and then the mixture was stirred at room temperature (2 h) and filtered. The solid residue was rinsed with CH<sub>2</sub>Cl<sub>2</sub> and the combined organic layers were evaporated to give 21.80 g (92%) of (4-(1,3-dioxolan-2-yl)phenyl)methanamine as a slightly yellow residue and the amine was not further purified:  $R_f$  = 0.20–0.44 (5/95 MeOH/CHCl<sub>3</sub>); <sup>1</sup>H NMR (CDCl<sub>3</sub>) δ 1.43 (s, NH<sub>2</sub>), 3.85 (s, CH<sub>2</sub>NH<sub>2</sub>), 3.96–4.16 (m, OCH<sub>2</sub>CH<sub>2</sub>O), 5.79 (s, OC(H)O), 7.31 (d,  $J$  = 8.1 Hz, 2 ArH), 7.43 (d,  $J$  = 8.1 Hz, 2 ArH); <sup>13</sup>C NMR (CDCl<sub>3</sub>) δ 46.4 (NH<sub>2</sub>CH<sub>2</sub>C<sub>6</sub>H<sub>4</sub>), 65.6 (OCH<sub>2</sub>CH<sub>2</sub>O), 103.7 (OC(H)O), 126.8 (2 C<sub>2'</sub> or 2 C<sub>3'</sub>), 127.3 (2 C<sub>3'</sub> or 2 C<sub>2'</sub>), 136.5 (NH<sub>2</sub>CH<sub>2</sub>C<sub>4'</sub>), 144.6 (C<sub>1'</sub>CH(O)O).

**Preparation of (*R*)-*N*-(4'-(1,3-Dioxolan-2-yl))benzyl 2-*N*-(benzyloxycarbonyl)amino-3-hydroxypropionamide ((*R*)-97).** To a THF solution (200 mL) of (4-(1,3-dioxolan-2-yl)phenyl)methanamine (5.09 g, 28.44 mmol) was added (*R*)-Cbz-serine (6.18 g, 25.85 mmol) in portions. After 5 min a white solid precipitated and additional THF (200 mL) was added to allow efficient stirring. DMTMM (7.86 g, 28.44 mmol) was added to the suspension and the reaction was stirred at room temperature (3 h). The reaction mixture was filtered and the cake was rinsed with THF. The filtrate was evaporated to dryness and dissolved in minimal amount of hot CHCl<sub>3</sub>, cooled to 0 °C, and then hexanes added to give a white precipitate. The solid was filtered, triturated with ice-cold CHCl<sub>3</sub>, and filtered. The last two steps were repeated twice. The workup procedure gave 5.46 g (54%) of (*R*)-*N*-(4'-(1,3-dioxolan-2-yl))benzyl 2-*N*-(benzyloxycarbonyl)amino-3-hydroxypropionamide. The filtrate was concentrated *in vacuo* and purified using flash chromatography (6/93.5/0.5 MeOH/CHCl<sub>3</sub>/NEt<sub>3</sub>) to yield another 1.86 g (18%) of (*R*)-*N*-(4'-(1,3-dioxolan-2-yl))benzyl 2-*N*-(benzyloxycarbonyl)amino-3-hydroxypropionamide (total yield: 7.42 g, 72%):  $R_f$  =

## Supporting Information

0.37 (5/95 MeOH/CHCl<sub>3</sub>); mp 129–131 °C; [ $\alpha$ ]<sub>D</sub><sup>25</sup> –2.9° (*c* 1.0, MeOH); IR (nujol) 3288, 1689, 1642, 1540, 1459 cm<sup>-1</sup>; <sup>1</sup>H NMR (DMSO-*d*<sub>6</sub>)  $\delta$  3.53–3.59 (m, CHCH<sub>2</sub>O), 3.88–4.13 (m, OCH<sub>2</sub>CH<sub>2</sub>O, CHCH<sub>2</sub>O), 4.30 (d, *J* = 5.7 Hz, NHCH<sub>2</sub>C<sub>6</sub>H<sub>4</sub>), 4.82–4.97 (br s, CH<sub>2</sub>OH). 5.04 (s, C<sub>6</sub>H<sub>5</sub>CH<sub>2</sub>O), 5.69 (s, OC(H)O), 7.19–7.42 (m, 9 ArC), 8.44 (t, *J* = 5.7 Hz, NHCH<sub>2</sub>C<sub>6</sub>H<sub>4</sub>), the carbamate NH was not detected; <sup>13</sup>C NMR (CD<sub>3</sub>OD)  $\delta$  44.0 (NHCH<sub>2</sub>C<sub>6</sub>H<sub>4</sub>), 58.9 (CHCH<sub>2</sub>OH), 63.4 (C<sub>6</sub>H<sub>5</sub>CH<sub>2</sub>O), 66.4 (OCH<sub>2</sub>CH<sub>2</sub>O), 68.0 (CHCH<sub>2</sub>OH), 104.9 (OC(H)O), 128.0, 128.4, 129.1, 129.2, 129.6, 138.2, 138.5, 141.0 (8 ArC), 158.6 (OC(O)NH), 173.2 (CHC(O)NH); HRMS (M+Na<sup>+</sup>) (ESI<sup>+</sup>) 423.1525 (calcd for C<sub>21</sub>H<sub>24</sub>N<sub>2</sub>O<sub>6</sub>Na<sup>+</sup> 423.1532); Anal. Calcd. for C<sub>21</sub>H<sub>24</sub>N<sub>2</sub>O<sub>6</sub>: C, 62.99; H, 6.04; N, 7.00. Found: C, 62.86; H, 6.05; N, 7.06.

**Preparation of (S)-N-(4'-(1,3-Dioxolan-2-yl))benzyl 2-N-(Benzyloxycarbonyl)amino-3-hydroxypropionamide ((S)-97).** Using the preceding procedure, Cbz-L-serine (6.18 g, 25.8 mmol), (4-(1,3-dioxolan-2-yl)phenyl)methanamine (5.09 g, 28.4 mmol) and DMTMM (7.86 g, 28.4 mmol) in THF (2 x 200 mL) gave 5.66 g (55%) of (S)-N-(4'-(1,3-dioxolan-2-yl))benzyl 2-N-(benzyloxycarbonyl)amino-3-hydroxypropionamide and another 1.78 g (17%) after flash chromatography (6/93.5/0.5 MeOH/CHCl<sub>3</sub>/NEt<sub>3</sub>) (total yield: 7.44 g, 72%): *R*<sub>f</sub> = 0.37 (5/95 MeOH/CHCl<sub>3</sub>); mp 129–131 °C; [ $\alpha$ ]<sub>D</sub><sup>25</sup> +2.9° (*c* 1.0, MeOH); IR (nujol) 3288, 1689, 1642, 1540, 1459 cm<sup>-1</sup>; <sup>1</sup>H NMR (DMSO-*d*<sub>6</sub>)  $\delta$  3.53–3.59 (m, CHCH<sub>2</sub>O), 3.88–4.13 (m, OCH<sub>2</sub>CH<sub>2</sub>O, CHCH<sub>2</sub>O), 4.30 (d, *J* = 5.7 Hz, NHCH<sub>2</sub>C<sub>6</sub>H<sub>4</sub>), 4.90 (t, *J* = 5.4 Hz, CH<sub>2</sub>OH), 5.04 (s, C<sub>6</sub>H<sub>5</sub>CH<sub>2</sub>O), 5.69 (s, OC(H)O), 7.19–7.42 (m, 9 ArH), 8.44 (t, *J* = 5.7 Hz, NHCH<sub>2</sub>C<sub>6</sub>H<sub>4</sub>), the carbamate NH was not detected; <sup>13</sup>C NMR (DMSO-*d*<sub>6</sub>)  $\delta$  41.9 (NHCH<sub>2</sub>C<sub>6</sub>H<sub>4</sub>), 57.4 (CHCH<sub>2</sub>OH), 61.7 (C<sub>6</sub>H<sub>5</sub>CH<sub>2</sub>O), 64.8 (OCH<sub>2</sub>CH<sub>2</sub>O), 65.5 (CHCH<sub>2</sub>OH), 102.7 (OC(H)O), 126.2, 126.8, 127.7, 127.8, 128.3, 136.5, 137.0, 140.4, (8 ArC) 155.9 (OC(O)NH), 170.2 (CHC(O)NH); HRMS (M+Na<sup>+</sup>) (ESI<sup>+</sup>) 423.1531 (calcd for C<sub>21</sub>H<sub>24</sub>N<sub>2</sub>O<sub>6</sub>Na<sup>+</sup> 423.1532); Anal. Calcd. for C<sub>21</sub>H<sub>24</sub>N<sub>2</sub>O<sub>6</sub>: C, 62.99; H, 6.04; N, 7.00. Found: C, 63.00; H, 6.03; N, 6.97.

## Supporting Information

**Preparation of (*R*)-*N*-(4'-(1,3-Dioxolan-2-yl))benzyl 2-*N*-(Benzyloxycarbonyl)amino-3-methoxypropionamide ((*R*)-98).** To a CH<sub>3</sub>CN solution (100 mL) of (*R*)-*N*-(4'-(1,3-dioxolan-2-yl))benzyl 2-*N*-(benzyloxycarbonyl)amino-3-hydroxypropionamide (5.56 g 13.9 mmol) were successively added Ag<sub>2</sub>O (16.19 g, 69.5 mmol) and MeI (8.66 mL, 139 mmol) and the suspension was stirred at room temperature (3 d) in the dark. The reaction mixture was filtered through a Celite bed and the residue rinsed with CHCl<sub>3</sub>. The combined organic layer was evaporated to give an oily residue (~ 5 mL). Ice-cold Et<sub>2</sub>O (150 mL) was added to the residue and a white solid precipitated. The solid was filtered, rinsed with ice-cold Et<sub>2</sub>O and dried to give 3.95 g (69%) of (*R*)-*N*-(4'-(1,3-dioxolan-2-yl))benzyl 2-*N*-(benzyloxycarbonyl)amino-3-methoxypropionamide as a white powder:  $R_f = 0.57$  (5/95 MeOH/CHCl<sub>3</sub>); mp 118–119 °C;  $[\alpha]_D^{25} -1.5^\circ$  (c 1.0, MeOH); IR (film) 3424, 3055, 2986, 1723, 1678 cm<sup>-1</sup>; <sup>1</sup>H NMR (CDCl<sub>3</sub>)  $\delta$  3.36 (s, CH<sub>2</sub>OCH<sub>3</sub>), 3.47 (dd,  $J = 6.6, 9.3$  Hz, CHH'OCH<sub>3</sub>), 3.87 (dd  $J = 3.8, 9.3$  Hz, CHH'OCH<sub>3</sub>), 4.01–4.15 (m, OCH<sub>2</sub>CH<sub>2</sub>O), 4.28–4.38 (br m, CHCH'H), 4.48 (d,  $J = 5.7$  Hz, NHCH<sub>2</sub>C<sub>6</sub>H<sub>4</sub>), 5.12 (s, C<sub>6</sub>H<sub>5</sub>CH<sub>2</sub>O), 5.61–5.70 (br m, OC(O)NH), 5.80 (s, OCHO), 6.61–6.74 (br m, NHCH<sub>2</sub>C<sub>6</sub>H<sub>4</sub>), 7.22–7.48 (m, 9 ArH), 8.44 (t,  $J = 5.7$  Hz, NHCH<sub>2</sub>C<sub>6</sub>H<sub>4</sub>); <sup>13</sup>C NMR (CDCl<sub>3</sub>)  $\delta$  43.5 (NH<sub>2</sub>CH<sub>2</sub>C<sub>6</sub>H<sub>4</sub>), 54.5 (CHCH<sub>2</sub>OCH<sub>3</sub>), 59.3 (CH<sub>2</sub>OCH<sub>3</sub>), 65.5 (OCH<sub>2</sub>CH<sub>2</sub>O), 67.5 (C<sub>6</sub>H<sub>5</sub>CH<sub>2</sub>O), 72.2 (CH<sub>2</sub>OCH<sub>3</sub>), 103.7 (OC(H)O), 127.1, 127.7, 128.4, 128.5, 128.8, 136.2, 137.5, 139.1 (8 ArC), 156.3 (OC(O)NH), 170.1 (CHC(O)NH); HRMS (M+Na<sup>+</sup>) (ESI<sup>+</sup>) 437.1681 (calcd for C<sub>22</sub>H<sub>26</sub>N<sub>2</sub>O<sub>6</sub>Na<sup>+</sup> 437.1689); Anal. Calcd. for C<sub>22</sub>H<sub>26</sub>N<sub>2</sub>O<sub>6</sub>•0.25H<sub>2</sub>O: C, 63.07; H, 6.38; N, 6.69. Found. C, 63.09; H, 6.37; N, 6.64.

**Preparation (*S*)-*N*-(4'-(1,3-Dioxolan-2-yl))benzyl 2-*N*-(Benzyloxycarbonyl)amino-3-methoxypropionamide ((*S*)-98).** Using the preceding procedure, (*S*)-*N*-(4'-(1,3-dioxolan-2-yl))benzyl 2-*N*-(benzyloxycarbonyl)amino-3-hydroxypropionamide (5.66 g, 14.2 mmol), Ag<sub>2</sub>O (16.54 g, 71.0 mmol) and MeI (8.84 mL, 142.0 mmol) gave 3.91 g (67%) of (*S*)-*N*-(4'-(1,3-dioxolan-2-yl))benzyl 2-*N*-(benzyloxycarbonyl)amino-3-

## Supporting Information

methoxypropionamide after precipitation from Et<sub>2</sub>O:  $R_f = 0.57$  (5% MeOH/CHCl<sub>3</sub>); mp 118–119 °C;  $[\alpha]_D^{25} +1.5^\circ$  (*c* 1.0, MeOH); IR (nujol) 3298, 1690, 1645, 1542 cm<sup>-1</sup>; <sup>1</sup>H NMR (CDCl<sub>3</sub>)  $\delta$  3.34 (s, CH<sub>2</sub>OCH<sub>3</sub>), 3.47 (dd,  $J = 6.6, 9.3$  Hz, CHH'OCH<sub>3</sub>), 3.82 (dd  $J = 3.8, 9.3$  Hz, CHH'OCH<sub>3</sub>), 4.01–4.15 (m, OCH<sub>2</sub>CH<sub>2</sub>O), 4.08–4.18 (br m, CHCH'H), 4.45 (d,  $J = 5.7$  Hz, NHCH<sub>2</sub>C<sub>6</sub>H<sub>4</sub>), 5.10 (s, C<sub>6</sub>H<sub>5</sub>CH<sub>2</sub>O), 5.73 (br d,  $J = 5.7$  Hz, OC(O)NH), 5.78 (s, OC(H)O), 6.61–6.74 (br m, NHCH<sub>2</sub>C<sub>6</sub>H<sub>4</sub>), 7.26 (d,  $J = 7.8$  Hz, 2 ArH), 7.31–7.39 (m, C<sub>6</sub>H<sub>5</sub>), 7.42 (d,  $J = 7.8$  Hz, 2 ArH); <sup>13</sup>C NMR (CDCl<sub>3</sub>)  $\delta$  43.4 (NH<sub>2</sub>CH<sub>2</sub>C<sub>6</sub>H<sub>4</sub>), 54.5 (CHCH<sub>2</sub>OH), 59.3 (CH<sub>2</sub>OCH<sub>3</sub>), 65.5 (OCH<sub>2</sub>CH<sub>2</sub>O), 67.4 (C<sub>6</sub>H<sub>5</sub>CH<sub>2</sub>O), 72.2 (CH<sub>2</sub>OCH<sub>3</sub>), 103.6 (OC(H)O), 127.0, 127.7, 128.3, 128.4, 128.7, 136.2, 137.4, 139.1 (9 ArC), 156.3 (OC(O)NH), 170.0 (CHC(O)NH); HRMS (M+Na<sup>+</sup>) (ESI<sup>+</sup>) 437.1687 (calcd for C<sub>22</sub>H<sub>26</sub>N<sub>2</sub>O<sub>6</sub>Na<sup>+</sup> 437.1689); Anal. Calcd. for C<sub>22</sub>H<sub>26</sub>N<sub>2</sub>O<sub>6</sub>•0.25H<sub>2</sub>O: C, 63.07; H, 6.38; N, 6.69. Found: C, 63.18; H, 6.38; N, 6.70.

**Preparation of (*R*)-*N*-(4'-(1,3-Dioxolan-2-yl))benzyl 2-Amino-3-methoxypropionamide ((*R*)-99).** (*R*)-*N*-(4'-(1,3-Dioxolan-2-yl))benzyl 2-*N*-(benzyloxycarbonyl)amino-3-methoxypropionamide (3.75 g, 9.1 mmol) was dissolved in MeOH (50 mL) and 10% Pd/C catalyst (700 mg) was added. The reaction mixture was vigorously stirred under H<sub>2</sub> (1 atm) overnight. The catalyst was removed by filtration over a bed of Celite and the filtrate was evaporated to give 2.57 g (100%) of (*R*)-*N*-(4'-(1,3-dioxolan-2-yl))benzyl 2-amino-3-methoxypropionamide as a yellow oily residue that was directly used for next step without purification:  $R_f = 0.24$  (1/9 MeOH/CHCl<sub>3</sub>);  $[\alpha]_D^{25} -1.3^\circ$  (*c* 1.0, MeOH); IR (neat) 3325, 1662, 1523 cm<sup>-1</sup>; <sup>1</sup>H NMR (CDCl<sub>3</sub>)  $\delta$  1.69 (br s, NH<sub>2</sub>CH), 3.34 (s, CH<sub>2</sub>OCH<sub>3</sub>), 3.58–3.64 (m, CH<sub>2</sub>OCH<sub>3</sub>, CHCH<sub>2</sub>OCH<sub>3</sub>), 4.01–4.15 (m, OCH<sub>2</sub>CH<sub>2</sub>O), 4.45 (dd,  $J = 2.1, 6.0$  Hz, NHCH<sub>2</sub>C<sub>6</sub>H<sub>4</sub>), 5.80 (s, OC(H)O), 7.28 (d,  $J = 8.4$  Hz, 2 ArH), 7.42 (d,  $J = 8.4$  Hz, 2 ArH), 7.76–7.84 (br m, NHCH<sub>2</sub>C<sub>6</sub>H<sub>4</sub>); <sup>13</sup>C NMR (CDCl<sub>3</sub>)  $\delta$  43.1 (NH<sub>2</sub>CH<sub>2</sub>C<sub>6</sub>H<sub>4</sub>), 54.9 (CHCH<sub>2</sub>OH), 59.1 (CH<sub>2</sub>OCH<sub>3</sub>), 65.5 (OCH<sub>2</sub>CH<sub>2</sub>O), 74.4 (CH<sub>2</sub>OCH<sub>3</sub>), 103.7 (OC(H)O), 127.0, 127.9, 137.3, 139.6 (4 ArC), 172.5 (CHC(O)NH); HRMS (M+H<sup>+</sup>) (ESI<sup>+</sup>) 281.1496 (calcd for

## Supporting Information

$C_{14}H_{20}N_2O_4H^+$  281.1501). ); Anal. Calcd. for  $C_{14}H_{20}N_2O_4 \cdot 0.25CH_3OH$ : C, 59.36; H, 7.34; N, 9.72. Found: C, 59.33; H, 7.14; N, 9.45.

**Preparation of (S)-N-(4'-(1,3-Dioxolan-2-yl))benzyl 2-Amino-3-methoxypropionamide ((S)-99).** Using the preceding procedure, (S)-N-(4'-(1,3-dioxolan-2-yl))benzyl 2-N-(benzyloxycarbonyl)amino-3-methoxypropionamide (3.81 g, 9.2 mmol) and 10% Pd/C catalyst (700 mg) gave 2.54 g (100%) of a yellow oily residue that was directly acetylated without purification:  $R_f = 0.24$  (10% MeOH/ $CHCl_3$ );  $[\alpha]_D^{25} +1.2^\circ$  ( $c$  1.0, MeOH); IR (neat) 3325, 1662, 1523  $cm^{-1}$ ;  $^1H$  NMR ( $CDCl_3$ )  $\delta$  1.72 (br s,  $NH_2CH$ ), 3.37 (s,  $CHH'OCH_3$ ), 3.59–3.65 (m,  $CH_2OCH_3$ ,  $CHCH_2OCH_3$ ), 4.01–4.16 (m,  $OCH_2CH_2O$ ), 4.45 (dd,  $J = 2.4, 6.0$  Hz,  $NHCH_2C_6H_4$ ), 5.80 (s,  $OC(H)O$ ), 7.29 (d,  $J = 8.1$  Hz, 2 ArH), 7.44 (d,  $J = 8.1$  Hz, 2 ArH), 7.76–7.84 (br m,  $NHCH_2C_6H_4$ );  $^{13}C$  NMR ( $CDCl_3$ )  $\delta$  43.1 ( $NH_2CH_2C_6H_4$ ), 54.9 ( $CHCHH'OH$ ), 59.1 ( $CH_2OCH_3$ ), 65.5 ( $OCH_2CH_2O$ ), 74.4 ( $CH_2OCH_3$ ), 103.7 ( $OC(H)O$ ), 127.0, 127.9, 137.3, 139.6 (4 ArC), 172.5 ( $CHC(O)NH$ ); HRMS ( $M+H^+$ ) (ESI $^+$ ) 281.1498 (calcd for  $C_{14}H_{20}N_2O_4H^+$  281.1501). Anal. Calcd. for  $C_{14}H_{20}N_2O_4 \cdot 0.25 CH_3OH$ : C, 59.36; H, 7.34; N, 9.72. Found: C, 59.28; H, 7.14; N, 9.52.

**Preparation of (R)-N-(4'-(1,3-Dioxolan-2-yl))benzyl 2-Acetamido-3-methoxypropionamide ((R)-53).** (R)-N-(4'-(1,3-Dioxolan-2-yl))benzyl 2-amino-3-methoxypropionamide (2.54 g, 9.07 mmol) was dissolved in THF (100 mL) and cooled (0 °C). Triethylamine (1.26 mL, 9.07 mmol) was added dropwise to the reaction followed by the slow addition of acetyl chloride (0.644 mL, 9.07 mmol). After the reaction was stirred at 0 °C (1 h), the white precipitate was filtered and the filtrate was evaporated. The crude residue was recrystallized from EtOAc and hexanes to give 1.67 g (57%) of (R)-N-(4'-(1,3-dioxolan-2-yl))benzyl 2-acetamido-3-methoxypropionamide as a light brown solid. The product was not further purified and directly used in the next step:  $R_f = 0.39$  (5/95 MeOH/ $CHCl_3$ ); mp 138–139 °C;  $[\alpha]_D^{25} -13.0^\circ$  ( $c$  1.0, MeOH); IR (nujol) 3281, 3084, 1638, 1546, 1458  $cm^{-1}$ ;  $^1H$  NMR ( $CDCl_3$ )  $\delta$  2.03 (s,  $CH_3C(O)$ ), 3.38 (s,  $CHH'OCH_3$ ), 3.43 (dd,

## Supporting Information

$J = 7.5, 9.0$  Hz,  $\text{CHH}'\text{OCH}_3$ ), 3.80 (dd  $J = 3.7, 9.0$  Hz,  $\text{CHH}'\text{OCH}_3$ ), 4.01–4.15 (m,  $\text{OCH}_2\text{CH}_2\text{O}$ ), 4.40–4.50 (m,  $\text{NHCH}_2\text{C}_6\text{H}_4$ ), 4.54 (app. dt,  $J = 3.7, 7.5$  Hz,  $\text{CHCH}'\text{H}$ ), 5.80 (s,  $\text{OC}(\text{H})\text{O}$ ), 6.45 (d,  $J = 6.6$  Hz,  $\text{CH}_3\text{C}(\text{O})\text{NH}$ ), 6.78–6.82 (m,  $\text{N}(\text{H})\text{CH}_2\text{C}_6\text{H}_4$ ), 7.27 (d,  $J = 7.8$  Hz, 2 ArH), 7.45 (d,  $J = 7.8$  Hz, 2 ArH);  $^{13}\text{C}$  NMR ( $\text{CDCl}_3$ )  $\delta$  23.4 ( $\text{CH}_3\text{C}(\text{O})$ ), 43.5 ( $\text{NH}_2\text{CH}_2\text{C}_6\text{H}_4$ ), 52.6 ( $\text{CHCH}_2\text{OH}$ ), 59.3 ( $\text{CH}_2\text{OCH}_3$ ), 65.5 ( $\text{OCH}_2\text{CH}_2\text{O}$ ), 71.8 ( $\text{CH}_2\text{OCH}_3$ ), 103.7 ( $\text{OC}(\text{H})\text{O}$ ), 127.0, 127.7, 137.5, 139.1 (4 ArC), 170.2, 170.5 (2 C(O)); HRMS ( $\text{M}+\text{Na}^+$ ) ( $\text{ESI}^+$ ) 345.1421 (calcd for  $\text{C}_{16}\text{H}_{22}\text{N}_2\text{O}_5\text{Na}^+$  345.1426); Anal. Calcd. for  $\text{C}_{16}\text{H}_{22}\text{N}_2\text{O}_5$ : C, 59.61; H, 6.88; N, 8.69. Found: C, 59.50; H, 6.90; N, 8.56.

**Preparation of (*S*)-*N*-(4'-(1,3-Dioxolan-2-yl))benzyl 2-Acetamido-3-methoxypropionamide ((*S*)-53).** Using the preceding procedure, (*S*)-*N*-(4'-(1,3-dioxolan-2-yl))benzyl 2-amino-3-methoxypropionamide (2.57g, 9.18 mmol), triethylamine (1.28 mL, 9.18 mmol), and acetyl chloride (0.65 mL, 9.18 mmol) gave 1.70 g (57%) of (*S*)-*N*-(4'-(1,3-dioxolan-2-yl))benzyl 2-acetamido-3-methoxypropionamide as a light brown solid after precipitation from EtOAc and hexanes:  $R_f = 0.39$  (5/95 MeOH/ $\text{CHCl}_3$ ); mp 138–139 °C;  $[\alpha]_D^{25} +13.0^\circ$  ( $c$  1.0, MeOH); IR (nujol) 3281, 3090, 1638, 1546, 1458  $\text{cm}^{-1}$ ;  $^1\text{H}$  NMR ( $\text{CDCl}_3$ )  $\delta$  1.97 (s,  $\text{CH}_3\text{C}(\text{O})$ ), 3.35 (s,  $\text{CH}_2\text{OCH}_3$ ), 3.45 (dd,  $J = 6.9, 9.0$  Hz,  $\text{CHH}'\text{OCH}_3$ ), 3.73 (dd  $J = 4.2, 9.0$  Hz,  $\text{CHH}'\text{OCH}_3$ ), 4.01–4.15 (m,  $\text{OCH}_2\text{CH}_2\text{O}$ ), 4.38 (dd,  $J = 5.6, 15.0$  Hz,  $\text{NHCHH}'\text{C}_6\text{H}_4$ ), 4.47 (dd,  $J = 5.6, 15.0$  Hz,  $\text{NHCHH}'\text{C}_6\text{H}_4$ ), 4.56–4.64 (app. dt,  $J = 4.2, 6.9$  Hz,  $\text{CHCH}'\text{H}$ ), 5.80 (s,  $\text{OC}(\text{H})\text{O}$ ), 6.76 (d,  $J = 6.9$  Hz,  $\text{CH}_3\text{C}(\text{O})\text{NH}$ ), 7.14 (t,  $J = 5.6$  Hz,  $\text{NHCH}_2\text{C}_6\text{H}_4$ ), 7.25 (d,  $J = 7.8$  Hz, 2 ArH), 7.42 (d,  $J = 7.8$  Hz, 2 ArH);  $^{13}\text{C}$  NMR ( $\text{CDCl}_3$ )  $\delta$  23.2 ( $\text{CH}_3\text{C}(\text{O})$ ), 43.3 ( $\text{NH}_2\text{CH}_2\text{C}_6\text{H}_4$ ), 52.7 ( $\text{CHCH}_2\text{OH}$ ), 59.2 ( $\text{CH}_2\text{OCH}_3$ ), 65.4 ( $\text{OCH}_2\text{CH}_2\text{O}$ ), 72.0 ( $\text{CH}_2\text{OCH}_3$ ), 103.6 ( $\text{OC}(\text{H})\text{O}$ ), 126.9, 127.6 (2 ArC), 137.2 ( $\text{NHCH}_2\text{C}$ ), 139.2 ( $\text{CC}(\text{H})\text{O}(\text{O})$ ), 170.2, 170.6 (2 C(O)); HRMS ( $\text{M}+\text{Na}^+$ ) ( $\text{ESI}^+$ ) 345.1424 (calcd for  $\text{C}_{16}\text{H}_{22}\text{N}_2\text{O}_5\text{Na}^+$  345.1426). Anal. Calcd. for  $\text{C}_{16}\text{H}_{22}\text{N}_2\text{O}_5$ : C, 59.61; H, 6.88; N, 8.69. Found: C, 59.51; H, 6.90; N, 8.58.



## Supporting Information

**Preparation of (*R*)-*N*-(4'-Formyl)benzyl 2-Acetamido-3-methoxypropionamide ((*R*)-29).** (*R*)-*N*-(4'-(1,3-dioxolan-2-yl))benzyl 2-acetamido-3-methoxypropionamide (1.62 g, 5.03 mmol) was dissolved in a 2:1 THF:H<sub>2</sub>O mixture (30 mL) and 2 M HCl (10 drops) was added. The reaction was stirred at room temperature overnight and diluted with H<sub>2</sub>O (20 mL). The solution was neutralized with the dropwise addition of a saturated aqueous NaHCO<sub>3</sub> solution at 0 °C. The THF was removed in vacuo and the remaining aqueous layer was extracted with CHCl<sub>3</sub> (5 x 25 mL). The organic layers were combined, dried (Na<sub>2</sub>SO<sub>4</sub>), concentrated in vacuo, and the residue recrystallized from EtOAc to give 930 mg (66%) of (*R*)-*N*-(4'-formyl)benzyl 2-acetamido-3-methoxypropionamide as a white solid. The mother liquor was concentrated and purified by flash chromatography (5/95 MeOH/CHCl<sub>3</sub>) to yield of product 336 mg (24%) (total yield: 1.27 g (90%)): *R*<sub>f</sub> = 0.40 (5/95 MeOH/CHCl<sub>3</sub>); mp 132–133 °C; [α]<sup>25</sup><sub>D</sub> +10.4° (c 1.0, CHCl<sub>3</sub>); IR (nujol) 3288, 1687, 1642, 1549, 1458, 1375 cm<sup>-1</sup>; <sup>1</sup>H NMR (CDCl<sub>3</sub>) δ 1.96 (s, CH<sub>3</sub>C(O)), 3.36 (s, CH<sub>2</sub>OCH<sub>3</sub>), 3.53 (dd, *J* = 6.0, 9.3 Hz, CHH'OCH<sub>3</sub>), 3.75 (dd *J* = 4.8, 9.3 Hz, CHH'OCH<sub>3</sub>), 4.38–4.58 (m, NHCH<sub>2</sub>C<sub>6</sub>H<sub>4</sub>), 4.71 (app. dt, *J* = 5.4, 6.0 Hz, CHCH'H), 7.03 (d, *J* = 7.8 Hz, NHCH<sub>2</sub>C<sub>6</sub>H<sub>4</sub>), 7.38 (d, *J* = 8.4 Hz, 2 ArH), 7.68 (t, *J* = 5.4 Hz, CH<sub>3</sub>C(O)NH), 7.77 (d, *J* = 8.4 Hz, 2 ArH), 9.93 (s, C(O)H), addition of excess (*R*)-(-)-mandelic acid to a CDCl<sub>3</sub> solution of (*R*)-*N*-(4'-formyl)benzyl 2-acetamido-3-methoxypropionamide gave only one signal for the methoxy protons and the acetyl peak protons, addition of excess (*R*)-(-)-mandelic acid to a CDCl<sub>3</sub> solution of (*S*)-*N*-(4'-formyl)benzyl 2-acetamido-3-methoxypropionamide and (*R*)-*N*-(4'-formyl)benzyl 2-acetamido-3-methoxypropionamide (1:2 ratio) gave two signals for the acetyl methyl protons (δ 2.037 (*S*) and 2.023 (*R*) (Δppm = 0.014)) and two signals for the methoxy protons (δ 3.346 (*S*) and 3.377 (*R*) (Δppm = 0.031)); <sup>13</sup>C NMR (CDCl<sub>3</sub>) δ 23.0 (CH<sub>3</sub>C(O)), 43.1 (NH<sub>2</sub>CH<sub>2</sub>C<sub>6</sub>H<sub>4</sub>), 52.8 (CHCHH'OH), 59.1 (CH<sub>2</sub>OCH<sub>3</sub>), 72.0 (CHH'OCH<sub>3</sub>), 127.7, 130.0, 135.5, 145.3 (4 ArC), 170.5, 170.7 (2 C(O)), 192.0 (C(O)H); HRMS (M+Na<sup>+</sup>) (ESI<sup>+</sup>) 301.1158 [M+Na<sup>+</sup>] (calcd for C<sub>14</sub>H<sub>18</sub>N<sub>2</sub>O<sub>4</sub>Na<sup>+</sup> 301.1164); Anal. Calcd. for C<sub>14</sub>H<sub>18</sub>N<sub>2</sub>O<sub>4</sub>: C, 60.42; H, 6.52; N, 10.07. Found: C, 60.40; H, 6.57; N, 9.90.

## Supporting Information

**Preparation of (*S*)-*N*-(4'-Formyl)benzyl 2-Acetamido-3-methoxypropionamide ((*S*)-29).** Using the preceding procedure, (*S*)-*N*-(4'-(1,3-dioxolan-2-yl))benzyl 2-acetamido-3-methoxypropionamide (1.65 g, 5.12 mmol) gave 900 mg (63%) of (*S*)-*N*-(4'-formyl)benzyl 2-acetamido-3-methoxypropionamide after recrystallization from EtOAc and another 268 mg (19%) after flash chromatography (total yield: 1.17 g, 82%):  $R_f = 0.40$  (5/95 MeOH/CHCl<sub>3</sub>); mp 132–133 °C;  $[\alpha]_D^{25} -10.4^\circ$  ( $c$  1.0, CHCl<sub>3</sub>); IR (nujol) 3288, 3073, 1687, 1637, 1551, 1458, 1375 cm<sup>-1</sup>; <sup>1</sup>H NMR (CDCl<sub>3</sub>)  $\delta$  2.04 (s, CH<sub>3</sub>C(O)), 3.40 (s, CH<sub>2</sub>OCH<sub>3</sub>), 3.46 (dd,  $J = 7.5, 9.6$  Hz, CHH'OCH<sub>3</sub>), 3.83 (dd  $J = 4.2$  Hz, 9.6 Hz, CHH'OCH<sub>3</sub>), 4.48–4.64 (m, NHCH<sub>2</sub>C<sub>6</sub>H<sub>4</sub>, CHCH'H), 6.45 (d,  $J = 6.6$  Hz, CH<sub>3</sub>C(O)NH), 6.99–7.15 (m, NHCH<sub>2</sub>C<sub>6</sub>H<sub>4</sub>), 7.42 (d,  $J = 8.1$  Hz, 2 ArH), 7.85 (d,  $J = 8.1$  Hz, 2 ArH), 9.99 (s, C(O)H), addition of excess (*R*)-(-)-mandelic acid to a CDCl<sub>3</sub> solution of (*S*)-*N*-(4'-formyl)benzyl 2-acetamido-3-methoxypropionamide gave only one signal for the the acetyl peak protons and the methoxy protons, addition of excess (*R*)-(-)-mandelic acid to a CDCl<sub>3</sub> solution of (*S*)-*N*-(4'-formyl)benzyl 2-acetamido-3-methoxypropionamide and (*R*)-*N*-(4'-formyl)benzyl 2-acetamido-3-methoxypropionamide (1:2 ratio) gave two signals for the acetyl methyl protons ( $\delta$  2.037 (*S*) and 2.023 (*R*) ( $\Delta$ ppm = 0.014)) and two signals for the methoxy protons ( $\delta$  3.317 (*S*) and 3.351 (*R*) ( $\Delta$ ppm = 0.034)); <sup>13</sup>C NMR (CDCl<sub>3</sub>)  $\delta$  23.4 (CH<sub>3</sub>C(O)), 43.4 (NH<sub>2</sub>CH<sub>2</sub>C<sub>6</sub>H<sub>4</sub>), 52.7 (CHCH<sub>2</sub>OH), 59.4 (CH<sub>2</sub>OCH<sub>3</sub>), 71.7 (CH<sub>2</sub>OCH<sub>3</sub>), 128.0, 130.3, 135.9, 145.2 (4 ArC), 170.5, 170.6 (2 C(O)), 192.0 (C(O)H); HRMS (M+Na<sup>+</sup>) (ESI<sup>+</sup>) 301.1161 [M+Na<sup>+</sup>] (calcd for C<sub>14</sub>H<sub>18</sub>N<sub>2</sub>O<sub>4</sub>Na<sup>+</sup> 301.1164); Anal. Calcd. for C<sub>14</sub>H<sub>18</sub>N<sub>2</sub>O<sub>4</sub>: C, 60.42; H, 6.52; N, 10.07. Found: C, 60.13; H, 6.49; N, 9.91.

**23. Preparation of (*R*)-*N*-(4'-Carboxy)benzyl 2-Acetamido-3-methoxypropionamide ((*R*)-30).**

## Supporting Information

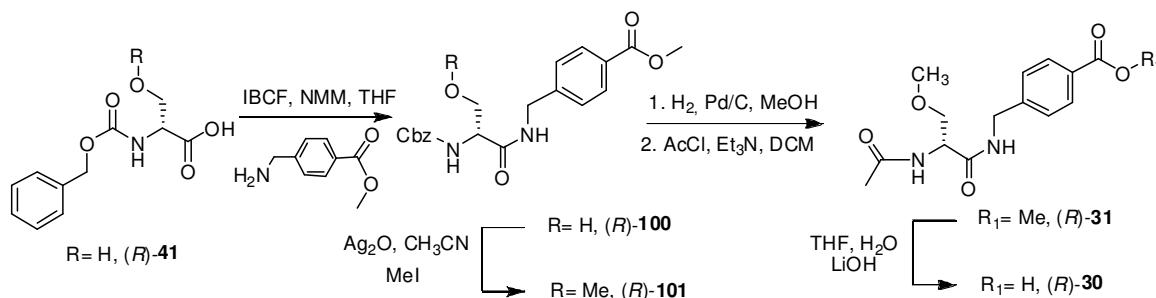

### Preparation of (*R*)-*N*-(4'-(Methyloxycarbonyl))benzyl 2-*N*-

**(Benzyloxycarbonyl)amino-3-hydroxypropionamide ((*R*)-100).** To an anhydrous THF solution (150 mL) of (*R*)-Cbz-serine (5.09 g, 21.3 mmol) at  $-78$  °C was added 4-methylmorpholine (NMM) (5.70 mL, 51.8 mmol). The solution was stirred (5 min), followed by the addition of isobutyl chloroformate (3.43 mL, 26.2 mmol). This mixture was stirred (5 min) and then methyl 4-(aminomethyl)benzoate hydrochloride (5.01 g, 24.8 mmol) was added. The reaction mixture was stirred at room temperature (1.5 h), and filtered. The filtrate was concentrated in vacuo, and purified by flash column chromatography (9:1  $\text{CHCl}_3$ :MeOH) yielding (*R*)-*N*-(4'-(methyloxycarbonyl))benzyl 2-*N*-(benzyloxycarbonyl)amino-3-hydroxypropionamide as a white powder (3.36 g, 66%):  $R_f = 0.75$  (9/1  $\text{CHCl}_3$ /MeOH); mp  $155\text{--}156$  °C;  $^1\text{H}$  NMR (DMSO- $d_6$ )  $\delta$  3.56–3.69 (m,  $\text{CH}_2\text{OH}$ ), 3.84 (s,  $\text{CH}_3$ ), 4.07–4.14 (m,  $\text{CH}$ ), 4.37 (d,  $J = 6.0$  Hz,  $\text{NHCH}_2$ ), 4.93 (t,  $J = 5.7$  Hz,  $\text{OH}$ ), 5.05 (s,  $\text{CH}_2\text{O}$ ), 7.28–7.41 (m,  $\text{NH}$ , 7  $\text{ArH}$ ), 7.89 (d,  $J = 8.1$  Hz, 2  $\text{ArH}$ ), 8.55 (t,  $J = 6.0$  Hz,  $\text{NHCH}_2$ );  $^{13}\text{C}$  NMR (DMSO- $d_6$ )  $\delta$  41.9 ( $\text{HNCH}_2\text{Ph}$ ), 52.0 ( $\text{CH}$ ), 57.4 ( $(\text{O})\text{COCH}_3$ ), 61.7 ( $\text{CH}_2\text{OH}$ ), 65.5 ( $\text{PhCH}_2\text{O}$ ), 127.1, 127.7, 128.0, 128.3, 129.1, 137.0, 145.2 (7  $\text{ArC}$ ), 156.0 ( $\text{OCN}(\text{H})$ ), 166.1, 170.4 (2  $\text{C}(\text{O})$ ), the remaining aromatic resonance was not detected and is believed to overlap with nearby signals; Anal. Calcd. for  $\text{C}_{20}\text{H}_{22}\text{N}_2\text{O}_6$ : C, 62.17; H, 5.74; N, 7.25. Found: C, 62.02; H, 5.78; N, 7.22.

## Supporting Information

**Preparation of (*R*)-*N*-(4'-(Methyloxycarbonyl))benzyl 2-*N*-(Benzyloxycarbonyl)amino-3-methoxypropionamide ((*R*)-101).** Dry (*R*)-*N*-(4'-(methyloxycarbonyl))benzyl 2-*N*-(benzyloxycarbonyl)amino-3-hydroxypropionamide (0.42 g, 1.1 mmol) was dissolved in CH<sub>3</sub>CN (20 mL), and then Ag<sub>2</sub>O (1.21 g, 5.2 mmol) and CH<sub>3</sub>I (0.65 mL, 10.4 mmol) were added. The solution was stirred in the dark at room temperature (72 h). The solution was filtered through Celite<sup>®</sup>, and then washed with CH<sub>3</sub>CN. The filtrate was evaporated, and the crude product was purified by column chromatography using a 15/1 CHCl<sub>3</sub>/MeOH solvent system to yield (*R*)-*N*-(4'-(methyloxycarbonyl))benzyl 2-*N*-(benzyloxycarbonyl)amino-3-methoxypropionamide (0.32 g, 77%) as a white solid: *R*<sub>f</sub> = 0.76 (9/1 CHCl<sub>3</sub>/MeOH); <sup>1</sup>H NMR (CDCl<sub>3</sub>) δ 3.37 (s, CH<sub>3</sub>OCH<sub>2</sub>), 3.45 (dd, *J* = 3.0, 9.0 Hz, CHH'OCH<sub>3</sub>), 3.87 (dd, *J* = 5.4, 9.0 Hz, CHH'OCH<sub>3</sub>), 3.91 (s, CH<sub>3</sub>OC(O)), 4.32–4.40 (m, CH), 4.53 (d, *J* = 6.0 Hz, NHCH<sub>2</sub>), 5.12 (s, PhCH<sub>2</sub>O), 5.68 (br s, NHCH), 6.76–6.84 (br t, NHCH<sub>2</sub>), 7.27–7.41 (m, 7 ArH), 7.99 (d, *J* = 8.1 Hz, 2 ArH).

**Preparation of (*R*)-*N*-(4'-(Methyloxycarbonyl))benzyl 2-Acetamido-3-methoxypropionamide ((*R*)-31).** Pd/C (10%, 400 mg) was added to a solution of (*R*)-*N*-(4'-(methyloxycarbonyl))benzyl 2-*N*-(benzyloxycarbonyl)amino-3-methoxypropionamide (1.28 g, 3.20 mmol) in anhydrous MeOH (35 mL). The mixture was hydrogenated (45 psi, 24 h), and then filtered through Celite<sup>®</sup>. The filtrate was evaporated in vacuo leaving a mixture (0.80 g) of a white solid (impurities, minor) and an oil of the desired amine (TLC analysis using ninhydrin indicated the presence of a primary amine).

The amine mixture was dissolved in anhydrous CH<sub>2</sub>Cl<sub>2</sub> (50 mL), and triethylamine (1.25 mL, 9 mmol) and acetyl chloride (0.32 mL, 4.5 mmol) were added sequentially and stirred at room temperature (30 min). The reaction solution was combined with CH<sub>2</sub>Cl<sub>2</sub> (100 mL) and washed with H<sub>2</sub>O (3 x 100 mL), and saturated aqueous NaCl (1 x 100 mL). The desired product was recrystallized from EtOAc to yield 0.43 g of a white solid (47% from (*R*)-*N*-(4'-(methyloxycarbonyl))benzyl 2-*N*-(benzyloxycarbonyl)amino-3-

## Supporting Information

methoxypropionamide):  $R_f = 0.62$  (9/1 CHCl<sub>3</sub>/MeOH); mp 167–168 °C;  $[\alpha]_D^{25} - 11.4^\circ$  ( $c$  2.2, CHCl<sub>3</sub>); IR (nujol) 3279, 2927, 1712, 1639, 1550, 1457 cm<sup>-1</sup>; <sup>1</sup>H NMR (CDCl<sub>3</sub>)  $\delta$  2.04 (s, CH<sub>3</sub>C(O)), 3.39 (s, CH<sub>3</sub>OCH<sub>2</sub>), 3.45 (dd,  $J = 7.5, 9.0$  Hz, CHH'OCH<sub>3</sub>), 3.82 (dd,  $J = 4.2, 9.0$  Hz, CHH'OCH<sub>3</sub>), 3.91 (s, CH<sub>3</sub>OC(O)), 4.51–4.55 (m, CH, CH<sub>2</sub>NH), 6.45 (d,  $J = 6.6$  Hz, NHCH), 6.85–6.95 (br m, NHCH<sub>2</sub>), 7.32 (d,  $J = 8.4$  Hz, 2 ArH), 8.00 (d,  $J = 8.4$  Hz, 2 ArH), addition of excess (*R*)-(-)-mandelic acid to a CDCl<sub>3</sub> solution of (*R*)-*N*-(4'-(methyloxycarbonyl))benzyl 2-acetamido-3-methoxypropionamide gave only one signal for the acetyl methyl protons and one signal for the ether methyl protons; <sup>13</sup>C NMR (CDCl<sub>3</sub>)  $\delta$  23.3 (CH<sub>3</sub>C(O)), 43.3 (CH<sub>2</sub>N), 52.3 (CH<sub>3</sub>OC(O)), 52.7 (CH), 59.2 (CH<sub>3</sub>OCH<sub>2</sub>), 72.0 (CH<sub>2</sub>O), 127.3, 129.4, 130.1, 143.4 (4 ArC), 167.0 (OC(O)), 170.4, 170.6 (2 C(O)); HRMS (ESI) 309.1451 [M + H<sup>+</sup>] (calcd. for C<sub>15</sub>H<sub>20</sub>N<sub>2</sub>O<sub>5</sub> 309.1450); Anal. Calcd. for C<sub>15</sub>H<sub>20</sub>N<sub>2</sub>O<sub>5</sub>: C, 58.43; H, 6.54; N, 9.09. Found: C, 58.40; H, 6.43; N, 8.91.

**Preparation of (*R*)-*N*-(4'-Carboxy)benzyl 2-Acetamido-3-methoxypropionamide ((*R*)-**30**).** To a solution of (*R*)-*N*-(4'-(methyloxycarbonyl))benzyl 2-acetamido-3-methoxypropionamide (0.75 g, 2.6 mmol) in THF:H<sub>2</sub>O (1:1, 50 mL) at 0 °C, was added LiOH·H<sub>2</sub>O (66 mg, 2.8 mmol). The resulting solution was stirred for 36 h. The solvent was removed in vacuo, washed with Et<sub>2</sub>O (4x, 100 mL), acidified to a pH of ~2 (1 N HCl), extracted with EtOAc (8 x 50 mL), dried over MgSO<sub>4</sub>, filtered, and concentrated in vacuo to yield 472 mg of a white powder (66%):  $R_f = 0.51$  (9/1 CHCl<sub>3</sub>/MeOH); mp 197–198 °C;  $[\alpha]_D^{25} +6.0^\circ$  ( $c$  0.8, MeOH); IR (nujol) 3163, 2923, 2856, 1692, 1637, 1533, 1457, 1376, 1291, 1122, 939 cm<sup>-1</sup>; <sup>1</sup>H NMR (CD<sub>3</sub>OD)  $\delta$  2.03 (s, CH<sub>3</sub>C(O)), 3.37 (s, CH<sub>3</sub>OCH<sub>2</sub>), 3.60 (dd,  $J = 5.1, 9.7$  Hz, CHH'OCH<sub>3</sub>), 3.72 (dd,  $J = 5.1, 9.7$  Hz, CHH'OCH<sub>3</sub>), 4.48 (d,  $J = 6.0$  Hz, CH<sub>2</sub>NH), 4.53 (t,  $J = 9.7$  Hz, CH), 7.39 (d,  $J = 8.3$  Hz, 2 ArH), 7.97 (d,  $J = 8.3$  Hz, 2 ArH), 8.57 – 8.66 (br t, NHCH<sub>2</sub>), one amide proton and the carboxylic acid proton were not observed; <sup>13</sup>C NMR (CD<sub>3</sub>OD)  $\delta$  21.4 (CH<sub>3</sub>C(O)), 42.7 (CH<sub>2</sub>N), 54.2 (CH), 58.2 (CH<sub>3</sub>O), 72.0 (CH<sub>2</sub>O), 127.1, 129.6, 129.8, 144.3 (4 ArC), 168.8 (HOC(O)), 171.6, 172.6 (2 C(O));

## Supporting Information

LRMS (ESI) 295.1 [M + H<sup>+</sup>] (calcd. for C<sub>14</sub>H<sub>18</sub>N<sub>2</sub>O<sub>5</sub>H<sup>+</sup>: 295.1); Anal. Calcd. for C<sub>14</sub>H<sub>18</sub>N<sub>2</sub>O<sub>5</sub>: C, 57.13; H, 6.16; N, 9.52. Found: C, 57.10; H, 6.18; N, 9.30.

### 24. Preparation of (*R*)-*N*-(4'-Amino)benzyl 2-Acetamido-3-methoxypropionamide ((*R*)-32).

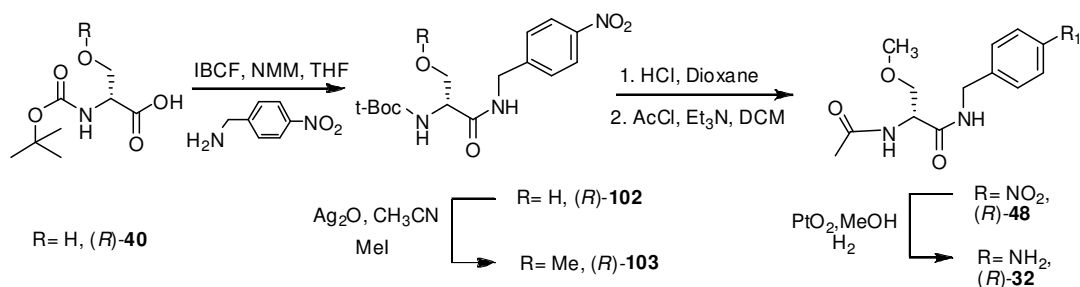

**Preparation of (*R*)-*N*-(4'-Nitro)benzyl 2-*N*-(*tert*-Butoxycarbonyl)amino-3-hydroxypropionamide ((*R*)-102).** A THF solution (140 mL) of (*S*)-*tert*-Boc-serine (1.00 g, 4.9 mmol) was stirred and cooled at -78 °C under Ar and then 4-methylmorpholine (NMM) (607  $\mu$ L, 5.9 mmol) was added dropwise. The reaction was stirred at this temperature (2 min) and then isobutylchloroformate (IBCF) (765  $\mu$ L, 5.9 mmol) was added dropwise leading to the precipitation of a white solid. The reaction was allowed to proceed for additional 2 min. A heterogeneous THF (10 mL) mixture of 4-nitrobenzylamine hydrochloride (1.02 g, 5.40 mmol) and NMM (593  $\mu$ L, 5.4 mmol) was added portionwise at -78 °C. The mixture was allowed to stir at room temperature (2 h), the white solid was filtered, and the organic layer was concentrated in vacuo. The residue was purified by flash chromatography on silica gel with EtOAc/hexanes (50/50 to 100/0) as the eluant to obtain (*R*)-*N*-(4'-nitro)benzyl 2-*N*-(*tert*-butoxycarbonyl)amino-3-hydroxypropionamide (843 mg, 51%) as a white solid:  $R_f = 0.29$  (5/5 EtOAc/hexanes); mp 128–129 °C;  $[\alpha]_D^{25} +10.1^\circ$  ( $c$  1.0, MeOH); IR (nujol) 3313, 3061, 1662, 1602, 1449, 1348, 1304, 1252, 1164, 1068, 1006, 855, 792, 738,

## Supporting Information

656  $\text{cm}^{-1}$ ;  $^1\text{H}$  NMR ( $\text{DMSO-}d_6$ )  $\delta$  1.40 (s,  $(\text{CH}_3)_3\text{C}$ ), 3.56–3.62 (m, OH,  $\text{CHH}'\text{OH}$ ), 3.97–4.04 (dd,  $J = 5.4, 13.0$  Hz,  $\text{CHH}'\text{OH}$ ), 4.34–4.50 (m,  $\text{CH}_2\text{N}$ ), 4.90 (t,  $J = 5.9$  Hz,  $\text{CHCHH}'$ ), 6.76 (d,  $J = 7.5$  Hz,  $\text{NHC(O)C(CH}_3)_3$ ), 7.53 (d,  $J = 8.7$  Hz, 2 ArH), 8.15 (d,  $J = 8.7$  Hz, 2 ArH), 8.55 (t,  $J = 5.9$  Hz,  $\text{CH}_2\text{NH}$ );  $^{13}\text{C}$  NMR ( $\text{DMSO-}d_6$ )  $\delta$  28.2 ( $(\text{CH}_3)_3\text{C}$ ), 41.7 ( $\text{NCH}_2$ ), 57.0 ( $\text{OCH}_2\text{CH}$ ), 61.7 ( $\text{OCH}_2\text{CH}$ ), 78.2 ( $(\text{CH}_3)_3\text{C}$ ), 123.2, 127.9, 146.3, 147.7 (4 ArC), 155.3 ( $\text{NC(O)O}$ ), 170.9 ( $\text{C(O)}$ ); HRMS ( $\text{M}+\text{Na}^+$ )(ESI $^+$ ) 362.1324 [ $\text{M} + \text{Na}^+$ ] (calcd for  $\text{C}_{15}\text{H}_{21}\text{N}_3\text{O}_6\text{Na}^+$  362.1322); Anal. Calcd. For  $\text{C}_{15}\text{H}_{21}\text{N}_3\text{O}_6$ : C, 53.09; H, 6.24; N, 12.38. Found: C, 52.99; H, 6.35; N, 11.98.

**Preparation of (*R*)-*N*-(4'-Nitro)benzyl 2-*N*-(*tert*-Butoxycarbonyl)amino-3-methoxypropionamide ((*R*)-103).**  $\text{Ag}_2\text{O}$  (9.00 g, 39.1 mmol) was added to a  $\text{CH}_3\text{CN}$  solution (100 mL) of (*R*)-*N*-(4'-nitro)benzyl 2-*N*-(*tert*-butoxycarbonyl)amino-3-hydroxypropionamide (2.65 g, 7.8 mmol) and then  $\text{CH}_3\text{I}$  (4.9 mL, 78.0 mmol) was added at room temperature under Ar. The reaction mixture was stirred at room temperature (3 d), filtered through a pad of Celite $^{\text{®}}$ , and the filtrate concentrated in vacuo. The residue was purified by column chromatography ( $\text{SiO}_2$ ; 1/1 EtOAc/hexanes) to obtain 2.21 g (80%) of (*R*)-*N*-(4'-nitro)benzyl 2-*N*-(*tert*-butoxycarbonyl)amino-3-methoxypropionamide as an oil that crystallized after a few days:  $R_f = 0.73$  (1/1 EtOAc/hexanes); mp 96–97  $^{\circ}\text{C}$ ;  $[\alpha]_{\text{D}}^{26} -1.5^{\circ}$  ( $c$  1.0, DMSO); IR (nujol) 3330, 1659, 1528, 1459, 1353, 1297, 1243, 1166, 1126, 1037, 947, 859, 778, 730, 645  $\text{cm}^{-1}$ ;  $^1\text{H}$  NMR ( $\text{CDCl}_3$ )  $\delta$  1.45 (s,  $(\text{CH}_3)_3\text{C}$ ), 3.40 (s,  $\text{OCH}_3$ ), 3.52 (dd,  $J = 6.0, 9.2$  Hz,  $\text{CHH}'\text{OCH}_3$ ), 3.88 (dd,  $J = 3.6, 9.2$  Hz,  $\text{CHH}'\text{OCH}_3$ ), 4.25–4.35 (m,  $\text{CHCHH}'$ ), 4.59 (d,  $J = 6.1$  Hz,  $\text{CH}_2\text{N}$ ), 5.30–5.40 (br m, NH), 6.86–6.96 (br m, NH), 7.43 (d,  $J = 8.7$  Hz, 2 ArH), 8.19 (d,  $J = 8.7$  Hz, 2 ArH);  $^{13}\text{C}$  NMR ( $\text{CDCl}_3$ )  $\delta$  28.2 ( $(\text{CH}_3)_3\text{C}$ ), 41.7 ( $\text{NCH}_2$ ), 54.2 ( $\text{OCH}_2\text{CH}$ ), 59.1 ( $\text{OCH}_3$ ), 71.9 ( $\text{OCH}_2\text{CH}$ ), 80.6 ( $(\text{CH}_3)_3\text{C}$ ), 123.8, 127.8, 145.7, 147.3 (4 ArC), 155.5 ( $\text{NC(O)O}$ ), 170.8 ( $\text{C(O)}$ ); HRMS ( $\text{M}+\text{H}^+$ )(ESI $^+$ ) 353.1583 [ $\text{M} + \text{H}^+$ ] (calcd for  $\text{C}_{16}\text{H}_{23}\text{N}_3\text{O}_6\text{H}^+$  353.1587); Anal. Calcd. For  $\text{C}_{16}\text{H}_{23}\text{N}_3\text{O}_6$ : C, 54.38; H, 6.56; N, 11.89. Found: C, 54.54; H, 6.60; N, 11.70.

## Supporting Information

**Preparation of (*R*)-*N*-(4'-Nitro)benzyl 2-Acetamido-3-methoxypropionamide ((*R*)-48).**<sup>7</sup> A saturated HCl solution in dioxane (1 mmol/2 mL, 17 mL) was added to (*R*)-*N*-(4'-nitro)benzyl 2-*N*-(*tert*-butoxycarbonyl)amino-3-methoxypropionamide (3.00 g, 8.5 mmol) at 0 °C and the solution was stirred at room temperature (2 h). The reaction solution was concentrated in vacuo and dried (30 min). CH<sub>2</sub>Cl<sub>2</sub> (30 mL) was added to the residue followed by the successive additions of Et<sub>3</sub>N (3.6 mL, 25.6 mmol) and AcCl (906 μL, 12.3 mmol) at 0 °C. The mixture was stirred at room temperature (18 h), and then aqueous 10% citric acid was added and the organic layer separated. The aqueous layer was extracted with CH<sub>2</sub>Cl<sub>2</sub> (2 x 30 mL). The organic layers were combined, washed with aqueous saturated NaHCO<sub>3</sub> (30 mL) and H<sub>2</sub>O (30 mL), dried (MgSO<sub>4</sub>), and concentrated in vacuo. The solid was recrystallized with EtOAc to obtain (*R*)-*N*-(4'-nitro)benzyl 2-acetamido-3-methoxypropionamide (2.43 g, 76%) as a white solid:  $R_f = 0.64$  (9/1 CH<sub>2</sub>Cl<sub>2</sub>/MeOH); mp 162 °C (lit.<sup>7</sup> mp 163–164 °C);  $[\alpha]_D^{25} +9.5$  (c 1.33, MeOH) (lit.<sup>7</sup>  $[\alpha]_D^{27} +9.6$  (c 1.33, MeOH)); <sup>1</sup>H NMR (CDCl<sub>3</sub>) δ 2.05 (s, CH<sub>3</sub>CO), 3.41 (s, OCH<sub>3</sub>), 3.48 (dd,  $J = 7.2, 9.2$  Hz, CHH'), 3.83 (dd,  $J = 4.2, 9.2$  Hz, CHH'), 4.49–4.64 (m, CH<sub>2</sub>N, NC(H)CO), 6.48 (br d,  $J = 6.6$  Hz, NHC(O)CH<sub>3</sub>), 7.08–7.19 (br t, CH<sub>2</sub>NH), 7.42 (d,  $J = 8.6$  Hz, 2 ArH), 8.18 (d,  $J = 8.6$  Hz, 2 ArH); <sup>13</sup>C NMR (CDCl<sub>3</sub>) δ 23.2 (CH<sub>3</sub>CO), 42.7 (CH<sub>2</sub>N), 52.6 (CHCH<sub>2</sub>), 59.1 (OCH<sub>3</sub>), 71.5 (CH<sub>2</sub>OCH<sub>3</sub>), 123.9, 127.9, 145.5, 147.2 (4 ArC), 170.4, 170.5 (2 C(O)).

**Preparation of (*R*)-*N*-(4'-Amino)benzyl 2-Acetamido-3-methoxypropionamide ((*R*)-32).**<sup>7</sup> A MeOH solution (150 mL) of (*R*)-*N*-(4'-nitro)benzyl 2-acetamido-3-methoxypropionamide (2.00 g, 6.8 mmol) was treated with H<sub>2</sub> (1 atm) in presence of PtO<sub>2</sub> (160 mg) at room temperature (16 h). The mixture was carefully filtered through a bed of Celite<sup>®</sup> and the filtrate was evaporated in vacuo to obtain a colorless oil that was triturated with EtOAc to give 1.67 g of (*R*)-*N*-(4'-amino)benzyl 2-acetamido-3-methoxypropionamide as a white solid (90%):  $R_f = 0.39$  (9/1 CHCl<sub>3</sub>/MeOH); mp 151–152 °C (lit.<sup>7</sup> mp 183–184 °C); <sup>1</sup>H NMR (CDCl<sub>3</sub>) δ 2.02 (s, CH<sub>3</sub>CO), 3.36 (s, OCH<sub>3</sub>), 3.42 (dd,  $J = 7.8,$



## Supporting Information

9.3 Hz, CHH'), 3.78 (dd,  $J = 4.5, 9.3$  Hz, CHH'), 4.34 (d,  $J = 5.4$  Hz, CH<sub>2</sub>N), 4.48–4.55 (m, NC(H)CO), 6.48 (br d,  $J = 6.0$  Hz, NHC(O)CH<sub>3</sub>), 6.60–6.67 (m, CH<sub>2</sub>NH, 2 ArH), 7.05 (d,  $J = 8.1$  Hz, 2 ArH), addition of excess (*R*)-(-)-mandelic acid to a CDCl<sub>3</sub> solution of (*R*)-*N*-(4'-amino)benzyl 2-acetamido-3-methoxypropionamide gave only one signal for the acetyl methyl and one signal for the ether methyl protons.

### 25. Preparation of (*R*)-*N*-(4'-(2,2,2-Trifluoroacetamido))benzyl 2-Acetamido-3-methoxypropionamide ((*R*)-33).

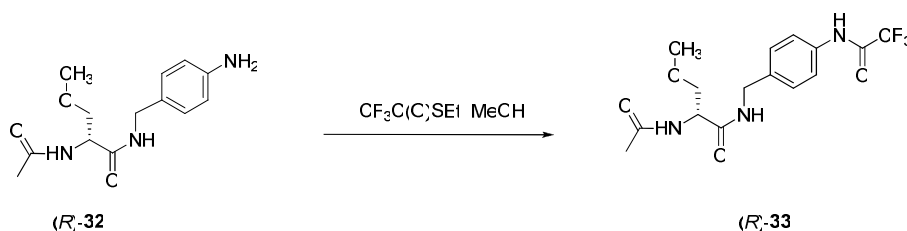

**Preparation of (*R*)-*N*-(4'-(2,2,2-Trifluoroacetamido))benzyl 2-Acetamido-3-methoxypropionamide ((*R*)-33).** (*S*)-Ethyltrifluoroacetate (2.99 g, 18.9 mmol) was added to a MeOH (10 mL) solution of (*R*)-*N*-(4'-amino)benzyl 2-acetamido-3-methoxypropionamide (1.00 g, 3.8 mmol) at room temperature and then the reaction was maintained at this temperature (3 h). Addition of EtOAc (10 mL) led to the precipitation of (*R*)-*N*-(4'-(2,2,2-trifluoroacetamido))benzyl 2-acetamido-3-methoxypropionamide as a white solid (600 mg) after filtration. The filtrate was concentrated in vacuum and the residue purified by flash chromatography on silica gel with EtOAc as the eluant to obtain an additional 350 mg of (*R*)-*N*-(4'-(2,2,2-trifluoroacetamido))benzyl 2-acetamido-3-methoxypropionamide as a white solid. The solids were combined to obtain 950 mg (70%) of (*R*)-*N*-(4'-(2,2,2-trifluoroacetamido))benzyl 2-acetamido-3-methoxypropionamide:  $R_f = 0.24$  (EtOAc); mp 202–204 °C;  $[\alpha]_D^{26} -1.2^\circ$  ( $c$  0.5,

## Supporting Information

DMSO); IR (nujol) 3389, 3282, 1721, 1653, 1536, 1459, 1375, 1294, 1249, 1206, 1150, 1066, 974, 896, 838, 727, 653  $\text{cm}^{-1}$ ;  $^1\text{H}$  NMR ( $\text{DMSO-}d_6$ )  $\delta$  1.87 (s,  $\text{CH}_3\text{CO}$ ), 3.25 (s,  $\text{OCH}_3$ ), 3.45–3.55 (m,  $\text{CHH}'\text{O}$ ), 4.27 (d,  $J = 5.8$  Hz,  $\text{CH}_2\text{N}$ ), 4.44–4.50 (m,  $\text{CH}$ ), 7.27 (d,  $J = 8.7$  Hz, 2 ArH), 7.58 (d,  $J = 8.7$  Hz, 2 ArH), 8.11 (d,  $J = 7.8$  Hz,  $\text{CH}_3\text{C}(\text{O})\text{NH}$ ), 8.51 (t,  $J = 5.8$  Hz,  $\text{CH}_2\text{NH}$ ), 11.23 (s,  $\text{CF}_3\text{C}(\text{O})\text{NH}$ );  $^{13}\text{C}$  NMR ( $\text{DMSO-}d_6$ )  $\delta$  22.4 ( $\text{CH}_3\text{C}(\text{O})$ ), 41.5 ( $\text{NCH}_2$ ), 52.6 ( $\text{OCH}_2\text{CH}$ ), 58.1 ( $\text{OCH}_3$ ), 71.9 ( $\text{OCH}_2\text{CH}$ ), 115.7 (q,  $J = 284.6$  Hz,  $\text{CF}_3$ ), 120.1, 127.4, 134.7, 136.7 (4 ArC), 154.3 (q,  $J = 37.5$  Hz,  $\text{NC}(\text{O})\text{CF}_3$ ), 169.3, 169.7 (2 C(O)); HRMS ( $\text{M}+\text{H}^+$ )( $\text{ESI}^+$ ) 362.1321 [ $\text{M} + \text{H}^+$ ] (calcd for  $\text{C}_{15}\text{H}_{18}\text{F}_3\text{N}_3\text{O}_4\text{H}^+$  362.1328); Anal. Calcd. For  $\text{C}_{15}\text{H}_{18}\text{F}_3\text{N}_3\text{O}_4$ : C, 49.86; H, 5.02; F, 15.77; N, 11.63. Found: C, 49.79; H, 4.91; F, 15.66; N, 11.56.

### 26. Preparation of (*R*)- and (*S*)-*N*-(4'-Azido)benzyl 2-Acetamido-3-methoxypropionamide ((*R*)- and (*S*)-34).

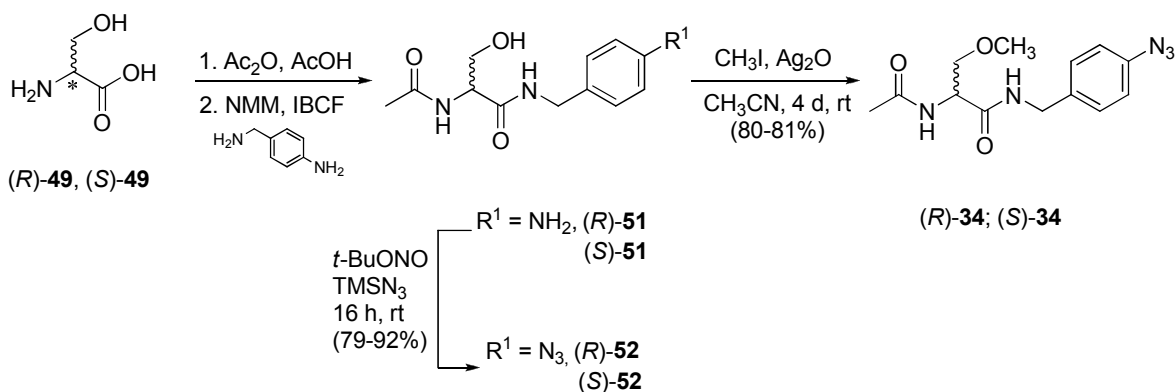

**Preparation of (*R*)-*N*-(4'-(Amino))benzyl 2-Acetamido-3-hydroxypropionamide ((*R*)-51).** To a stirred AcOH (80 mL) suspension of (*R*)-serine (10.00 g, 95.24 mmol) was added  $\text{Ac}_2\text{O}$  (9.44 mL, 100.00 mmol), and then the reaction suspension was stirred at room temperature (24 h). The AcOH was removed in vacuo to give an oily residue, and then THF (600 mL) was added to the residue. The solution was stirred and cooled at  $-78$  °C under Ar and then 4-methylmorpholine (NMM) (15.7 mL, 142.9 mmol) was added dropwise. After 2 min of stirring at this temperature, isobutylchloroformate (IBCF) (15.7 mL, 120.1

## Supporting Information

mmol) was added dropwise leading to the precipitation of a white solid, and the reaction was allowed to proceed for additional 2 min and then 4-aminobenzylamine (12.9 mL, 114.3 mmol) was added portionwise at -78 °C. The mixture was allowed to stir at room temperature (2 h), and then the white solid filtered and the organic layer concentrated in vacuo. The residue was purified by flash column chromatography on silica gel with MeOH/CHCl<sub>3</sub> (10/70) as the eluant to obtain (*R*)-*N*-(4'-(amino))benzyl 2-acetamido-3-hydroxypropionamide (3.35 g, 14%) as a white:  $R_f = 0.30$  (1/7 MeOH/CHCl<sub>3</sub>); mp 158–160 °C;  $[\alpha]_D^{26} +18.3^\circ$  ( $c$  1.0, MeOH); IR (nujol) 3302, 2924, 2359, 1630, 1551, 1458 cm<sup>-1</sup>; <sup>1</sup>H NMR (DMSO-*d*<sub>6</sub>)  $\delta$  1.86 (s, CH<sub>3</sub>C(O)), 3.55 (t,  $J = 5.6$  Hz, CH<sub>2</sub>OH), 4.06 (1/2HH'<sub>q</sub>,  $J = 5.9, 14.7$  Hz, CHH'Ar), 4.12 (1/2HH'<sub>q</sub>,  $J = 5.9, 14.7$  Hz, CHH'Ar), 4.24–4.30 (m, CH), 4.85 (t,  $J = 5.6$  Hz, OH), 4.94 (s, NH<sub>2</sub>), 6.46–6.50 (m, 2 ArH), 6.88–6.91 (m, 2 ArH), 7.88 (d,  $J = 7.8$  Hz, NHCH), 8.14 (t,  $J = 5.9$  Hz, NHCH<sub>2</sub>); <sup>13</sup>C NMR (DMSO-*d*<sub>6</sub>)  $\delta$  22.7 (CH<sub>3</sub>C(O)), 41.8 (CH<sub>2</sub>Ph), 55.2 (CH), 61.8 (CH<sub>2</sub>OH), 113.6, 126.1, 128.0, 147.4 (4 ArC), 169.3, 169.8 (2 C(O)); HRMS (M+H<sup>+</sup>)(ESI<sup>+</sup>) 252.1344 [M + H<sup>+</sup>] (calcd. for C<sub>12</sub>H<sub>18</sub>N<sub>3</sub>O<sub>3</sub> 252.1348); Anal. Calcd. for C<sub>12</sub>H<sub>17</sub>N<sub>3</sub>O<sub>3</sub>: C, 57.36; H, 6.82; N, 16.72. Found: C, 57.13; H, 6.87; N, 16.55.

**Preparation of (*S*)-*N*-(4'-(Amino))benzyl 2-Acetamido-3-hydroxypropionamide ((*S*)-51).** Using L-serine (10.00 g, 95.24 mmol), Ac<sub>2</sub>O (9.44 mL, 100.00 mmol), and the preceding procedure gave 3.30 g (14%) of (*S*)-*N*-(4'-(amino))benzyl 2-acetamido-3-hydroxypropionamide as a white solid:  $R_f = 0.30$  (1/7 MeOH/CHCl<sub>3</sub>); mp 158–160 °C;  $[\alpha]_D^{26} -18.7^\circ$  ( $c$  1.0, MeOH); IR (nujol) 3280, 2923, 1628, 1551, 1458 cm<sup>-1</sup>; <sup>1</sup>H NMR (DMSO-*d*<sub>6</sub>)  $\delta$  1.86 (s, CH<sub>3</sub>C(O)), 3.55 (t,  $J = 5.6$  Hz, CH<sub>2</sub>OH), 4.06 (1/2HH'<sub>q</sub>,  $J = 5.9, 14.7$  Hz, CHH'Ar), 4.12 (1/2HH'<sub>q</sub>,  $J = 5.9, 14.7$  Hz, CHH'Ar), 4.24–4.30 (m, CH), 4.86 (t,  $J = 5.6$  Hz, OH), 4.94 (s, NH<sub>2</sub>), 6.46–6.51 (m, 2 ArH), 6.88–6.91 (m, 2 ArH), 7.88 (d,  $J = 7.8$  Hz, NHCH), 8.14 (t,  $J = 5.9$  Hz, NHCH<sub>2</sub>); <sup>13</sup>C NMR (DMSO-*d*<sub>6</sub>)  $\delta$  22.7 (CH<sub>3</sub>C(O)), 41.8 (CH<sub>2</sub>Ph), 55.2 (CH), 61.8 (CH<sub>2</sub>OH), 113.7, 126.1, 128.1, 147.4 (4 ArC), 169.3, 169.9 (2 C(O)); HRMS (M+H<sup>+</sup>)(ESI<sup>+</sup>) 252.1344 [M + H<sup>+</sup>] (calcd. for

## Supporting Information

C<sub>12</sub>H<sub>18</sub>N<sub>3</sub>O<sub>3</sub> 252.1348); Anal. Calcd. for C<sub>12</sub>H<sub>17</sub>N<sub>3</sub>O<sub>3</sub>: C, 57.36; H, 6.82; N, 16.72. Found: C, 57.12; H, 6.84; N, 16.43.

**Preparation of (*R*)-*N*-(4'-Azido)benzyl 2-Acetamido-3-hydroxypropionamide ((*R*)-52).** To a cooled (0 °C) CH<sub>3</sub>CN solution (70 mL) of (*R*)-*N*-(4'-(amino))benzyl 2-acetamido-3-hydroxypropionamide (2.40 g, 9.56 mmol) maintained under Ar, *t*-BuONO (3.41 mL, 28.68 mmol) followed by TMSN<sub>3</sub> (3.02 mL, 22.94 mmol) were slowly added. The resulting solution was allowed to stir at room temperature (16 h) under Ar. The solvent was removed in vacuo, and the product was purified by column chromatography (SiO<sub>2</sub>; 1/9 MeOH/CHCl<sub>3</sub>) to give 2.10 g (79%) of (*R*)-*N*-(4'-azido)benzyl 2-acetamido-3-hydroxypropionamide as a white solid: *R*<sub>f</sub> = 0.35 (1/9 MeOH/CHCl<sub>3</sub>); mp 161–163 °C; [α]<sub>D</sub><sup>26</sup> +13.2° (c 1.0, MeOH); IR (nujol) 3268, 2924, 2128, 1649, 1553, 1459 cm<sup>-1</sup>; <sup>1</sup>H NMR (DMSO-*d*<sub>6</sub>) δ 1.87 (s, CH<sub>3</sub>C(O)), 3.58 (t, *J* = 5.7 Hz, CH<sub>2</sub>OH), 4.26–4.32 (m, CH<sub>2</sub>Ar, CH), 4.91 (t, *J* = 5.7 Hz, OH), 7.03–7.08 (m, 2 ArH), 7.28–7.31 (m, 2 ArH), 7.94 (d, *J* = 8.1 Hz, NHCH), 8.40 (t, *J* = 6.0 Hz, NHCH<sub>2</sub>); <sup>13</sup>C NMR (DMSO-*d*<sub>6</sub>) δ 22.7 (CH<sub>3</sub>C(O)), 41.5 (CH<sub>2</sub>Ph), 55.3 (CH), 61.7 (CH<sub>2</sub>OH), 118.9, 128.7, 136.5, 137.7 (4 ArC), 169.4, 170.3 (2 C(O)); HRMS (M+H<sup>+</sup>)(ESI<sup>+</sup>) 278.1249 [M + H<sup>+</sup>] (calcd. for C<sub>12</sub>H<sub>16</sub>N<sub>5</sub>O<sub>3</sub> 278.1253); Anal. Calcd. for C<sub>12</sub>H<sub>15</sub>N<sub>5</sub>O<sub>3</sub>: C, 51.98; H, 5.45; N, 25.26. Found: C, 51.93; H, 5.47; N, 24.98.

**Preparation of (*S*)-*N*-(4'-Azido)benzyl 2-Acetamido-3-hydroxypropionamide ((*S*)-52).** Using (*S*)-*N*-(4'-(amino))benzyl 2-acetamido-3-hydroxypropionamide (2.80 g, 11.16 mmol), *t*-BuONO (3.98 mL, 33.48 mmol), TMSN<sub>3</sub> (3.52 mL, 26.78 mmol), and the preceding procedure gave 2.85 g (92%) of (*S*)-*N*-(4'-azido)benzyl 2-acetamido-3-hydroxypropionamide as a white solid: *R*<sub>f</sub> = 0.35 (1/9 MeOH/CHCl<sub>3</sub>); mp 161–162 °C; [α]<sub>D</sub><sup>26</sup> –13.6° (c 1.0, MeOH); IR (nujol) 3267, 2924, 2129, 1648, 1552, 1459 cm<sup>-1</sup>; <sup>1</sup>H NMR (DMSO-*d*<sub>6</sub>) δ 1.87 (s, CH<sub>3</sub>C(O)), 3.58 (t, *J* = 5.6 Hz, CH<sub>2</sub>OH), 4.26–4.31 (m, CH<sub>2</sub>Ar, CH), 4.91 (t, *J* = 5.6 Hz, OH), 7.03–7.08 (m, 2 ArH), 7.27–7.32 (m, 2 ArH), 7.94 (d, *J* = 7.8 Hz, NHCH), 8.40 (t, *J* = 6.0 Hz, NHCH<sub>2</sub>); <sup>13</sup>C NMR (DMSO-*d*<sub>6</sub>) δ 22.6 (CH<sub>3</sub>C(O)),

## Supporting Information

41.5 (CH<sub>2</sub>Ph), 55.3 (CH), 61.7 (CH<sub>2</sub>OH), 118.9, 128.7, 136.5, 137.7 (4 ArC), 169.4, 170.3 (2 C(O)); HRMS (M+H<sup>+</sup>)(ESI<sup>+</sup>) 278.1248 [M + H<sup>+</sup>] (calcd. for C<sub>12</sub>H<sub>16</sub>N<sub>5</sub>O<sub>3</sub> 278.1253); Anal. Calcd. for C<sub>12</sub>H<sub>15</sub>N<sub>5</sub>O<sub>3</sub>: C, 51.98; H, 5.45; N, 25.26. Found: C, 52.08; H, 5.51; N, 25.00.

**Preparation of (*R*)-*N*-(4'-Azido)benzyl 2-Acetamido-3-methoxypropionamide ((*R*)-34).** Ag<sub>2</sub>O (4.85 g, 20.94 mmol) was added to a CH<sub>3</sub>CN solution (100 mL) of (*R*)-*N*-(4'-azido)benzyl 2-acetamido-3-hydroxypropionamide (1.16 g, 4.19 mmol) and CH<sub>3</sub>I (2.61 mL, 41.89 mmol) at room temperature under Ar. The reaction mixture was stirred at room temperature in the dark (5 d), filtered through a pad of Celite<sup>®</sup>, and the filtrate concentrated in vacuo. The solid was purified by flash column chromatography on silica gel (1/9 MeOH/CHCl<sub>3</sub>) to obtain 0.98 g (80%) of (*R*)-*N*-(4'-azido)benzyl 2-acetamido-3-methoxypropionamide as a white solid: *R*<sub>f</sub> = 0.5 (1/9 MeOH/CHCl<sub>3</sub>); mp 149-150 °C; [α]<sub>D</sub><sup>26</sup> -15.2° (c 1.0, MeOH); IR (nujol) 3285, 2931, 2113, 1635, 1560, 1456 cm<sup>-1</sup>; <sup>1</sup>H NMR (CDCl<sub>3</sub>) δ 2.03 (s, CH<sub>3</sub>C(O)), 3.38 (s, OCH<sub>3</sub>), 3.44 (dd, *J* = 7.5, 9.3 Hz, CHH'OCH<sub>3</sub>), 3.80 (dd, *J* = 4.2, 9.3 Hz, CHH'OCH<sub>3</sub>), 4.40 (1/2HH'<sub>q</sub>, *J* = 6.2, 15.0 Hz, CHH'Ar), 4.46 (1/2HH'<sub>q</sub>, *J* = 6.2, 15.0 Hz, CHH'Ar), 4.52–4.58 (m, CH), 6.48 (br d, *J* = 6.3 Hz, NHCH), 6.82–6.85 (br m, NHCH<sub>2</sub>), 6.96–7.01 (m, 2 ArH), 7.23–7.28 (m, 2 ArH), addition of excess (*R*)-(-)-mandelic acid to a CDCl<sub>3</sub> solution of (*R*)-*N*-(4'-azido)benzyl 2-acetamido-3-methoxypropionamide gave only a single signal for the acetyl methyl protons and the ether methyl protons, addition of excess (*R*)-(-)-mandelic acid to a CDCl<sub>3</sub> solution of (*R*)-*N*-(4'-azido)benzyl 2-acetamido-3-methoxypropionamide and (*S*)-*N*-(4'-azido)benzyl 2-acetamido-3-methoxypropionamide (1:2 ratio) gave two signals for the acetyl methyl protons (δ 1.995 (*R*) and 2.010 (*S*) (Δppm = 0.015)), and two signals for the ether methyl protons (δ 3.302 (*S*) and 3.342 (*R*) (Δppm = 0.040)); <sup>13</sup>C NMR (CDCl<sub>3</sub>) δ 23.4 (CH<sub>3</sub>C(O)), 43.1 (CH<sub>2</sub>Ph), 52.7 (CH), 59.3 (CH<sub>2</sub>OCH<sub>3</sub>), 71.8 (CH<sub>2</sub>OCH<sub>3</sub>), 119.5, 129.1, 134.9, 139.5 (4 ArC), 170.2, 170.5 (2 C(O)); HRMS (ESI) 292.1406 [M + H<sup>+</sup>] (calcd. for C<sub>13</sub>H<sub>18</sub>N<sub>5</sub>O<sub>3</sub> 292.1410); Anal.

## Supporting Information

Calcd. for  $C_{13}H_{17}N_5O_3$ : C, 53.60; H, 5.88; N, 24.04. Found: C, 53.72; H, 5.91; N, 23.84.

**Preparation of (*S*)-*N*-(4'-Azido)benzyl 2-Acetamido-3-methoxypropionamide ((*S*)-34).** Utilizing the preceding procedure, (*S*)-*N*-(4'-azido)benzyl 2-acetamido-3-hydroxypropionamide (2.40 g, 8.66 mmol),  $Ag_2O$  (10.04 g, 43.30 mmol), and MeI (5.40 mL, 86.60 mmol) gave crude (*S*)-*N*-(4'-azido)benzyl 2-acetamido-3-methoxypropionamide after 4 d. The product was purified by column chromatography ( $SiO_2$ ; 1/9 MeOH/ $CHCl_3$ ) to obtain 2.05 g (81%) of (*S*)-*N*-(4'-azido)benzyl 2-acetamido-3-methoxypropionamide as a white solid:  $R_f = 0.50$  (1/9 MeOH/ $CHCl_3$ ); mp 149–150 °C;  $[\alpha]_D^{26} +15.4^\circ$  ( $c$  1.0, MeOH); IR (nujol) 3285, 2927, 2112, 1635, 1565, 1457  $cm^{-1}$ ;  $^1H$  NMR ( $CDCl_3$ )  $\delta$  2.03 (s,  $CH_3C(O)$ ), 3.38 (s,  $OCH_3$ ), 3.43 (dd,  $J = 7.5, 9.0$  Hz,  $CHH'OCH_3$ ), 3.81 (dd,  $J = 4.2, 9.0$  Hz,  $CHH'OCH_3$ ), 4.40 (1/2 $HH'_q$ ,  $J = 6.0, 15.0$  Hz,  $CHH'Ar$ ), 4.46 (1/2 $HH'_q$ ,  $J = 6.0, 15.0$  Hz,  $CHH'Ar$ ), 4.51–4.57 (m,  $CH$ ), 6.43 (br d,  $J = 6.3$  Hz,  $NHCH$ ), 6.78–6.83 (br m,  $NHCH_2$ ), 6.96–7.01 (m, 2  $ArH$ ), 7.23–7.27 (m, 2  $ArH$ ), addition of excess (*R*)-(-)-mandelic acid to a  $CDCl_3$  solution of (*S*)-*N*-(4'-azido)benzyl 2-acetamido-3-methoxypropionamide gave only a single signal for the acetyl methyl protons and the ether methyl protons, addition of excess (*R*)-(-)-mandelic acid to a  $CDCl_3$  solution of (*R*)-*N*-(4'-azido)benzyl 2-acetamido-3-methoxypropionamide and (*S*)-*N*-(4'-azido)benzyl 2-acetamido-3-methoxypropionamide (1:2 ratio) gave two signals for the acetyl methyl protons ( $\delta$  1.995 (*R*) and 2.010 (*S*) ( $\Delta$ ppm = 0.015)), and the ether methyl protons ( $\delta$  3.302 (*S*) and 3.342 (*R*) ( $\Delta$ ppm = 0.040));  $^{13}C$  NMR ( $CDCl_3$ )  $\delta$  23.3 ( $CH_3C(O)$ ), 43.1 ( $CH_2Ph$ ), 52.7 ( $CH$ ), 59.2 ( $CH_2OCH_3$ ), 72.0 ( $CH_2OCH_3$ ), 119.4, 129.1, 135.0, 139.4 (4  $ArC$ ), 170.3, 170.6 (2  $C(O)$ ); HRMS ( $M+H^+$ )(ESI $^+$ ) 292.1405 [ $M + H^+$ ] (calcd. for  $C_{13}H_{18}N_5O_3$  292.1410); Anal. Calcd. for  $C_{13}H_{17}N_5O_3$ : C, 53.60; H, 5.88; N, 24.04. Found: C, 53.76; H, 5.97; N, 24.22.

**27. Preparation of (*R*)-*N*-(4'-Methoxy)benzyl 2-Acetamido-3-methoxypropionamide ((*R*)-35).**

## Supporting Information

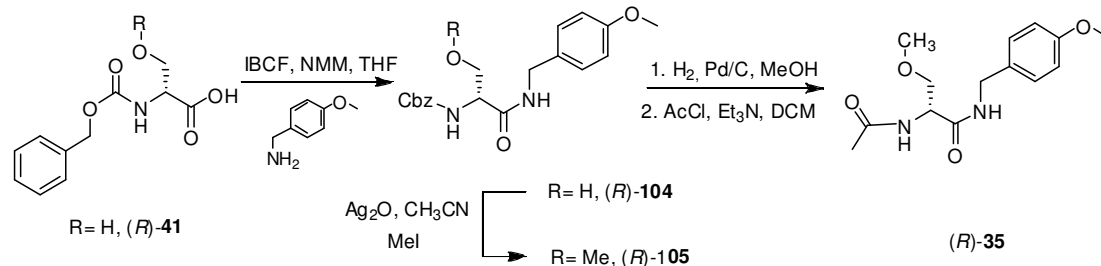

### Preparation of (*R*)-*N*-(4'-Methoxy)benzyl 2-*N*-

**(Benzyloxycarbonyl)amino-3-hydroxypropionamide ((*R*)-104).** A THF solution (100 mL) of (*R*)-Cbz-serine (7.00 g, 29.3 mmol) was stirred and cooled at -78 °C under Ar and then 4-methylmorpholine (NMM) (3.9 mL, 35.1 mmol) was added dropwise. After 2 min of stirring at this temperature, isobutylchloroformate (IBCF) (4.6 mL, 35.1 mmol) was added dropwise leading to the precipitation of a white solid, and the reaction was stirred (2 min). 4-Methoxybenzylamine (4.84 g, 35.1 mmol) was added portionwise at -78 °C, and the mixture was stirred at room temperature (2 h). The white solid was filtered and the organic layer was concentrated in vacuo. The residue was triturated with EtOAc resulting in a solid that was filtered and recrystallized with EtOAc to give (*R*)-*N*-(4'-methoxy)benzyl 2-*N*-(benzyloxycarbonyl)amino-3-hydroxypropionamide as a white solid (5.05 g, 48%):  $R_f = 0.62$  (EtOAc); mp 134–135 °C;  $[\alpha]_D^{24} -9.3^\circ$  ( $c$  1.0, DMSO); IR (nujol) 3336, 3255, 3107, 1710, 1645, 1577, 1519, 1457, 1377, 1313, 1245, 1174, 1045, 917  $\text{cm}^{-1}$ ;  $^1\text{H}$  NMR (DMSO- $d_6$ )  $\delta$  3.53–3.64 (m,  $\text{CH}_2\text{OH}$ ), 3.72 (s,  $\text{OCH}_3$ ), 4.03–4.11 (m,  $\text{NCH}$ ), 4.21 (d,  $J = 5.4$  Hz,  $\text{NCH}_2$ ), 4.88 (t,  $J = 5.7$  Hz,  $\text{OH}$ ), 5.04 (s,  $\text{CH}_2\text{O}$ ), 6.85 (d,  $J = 8.4$  Hz, 2 ArH), 7.17 (d,  $J = 8.4$  Hz, 2 ArH), 7.22 (d,  $J = 7.8$  Hz,  $\text{OC(O)NH}$ ), 7.28–7.38 (m, 5 ArH), 8.30–8.38 (br t,  $\text{CH}_2\text{NH}$ );  $^{13}\text{C}$  NMR (DMSO- $d_6$ )  $\delta$  41.4 ( $\text{NCH}_2$ ), 54.9 ( $\text{CH}_3\text{O}$ ), 57.3 ( $\text{OCH}_2\text{CH}$ ), 61.7 ( $\text{OCH}_2\text{CH}$ ), 65.4 ( $\text{CH}_2\text{O}$ ), 113.5, 127.6, 128.2, 131.1, 136.9 (5 ArC), 155.8 ( $\text{C(O)}$ ), 158.0 ( $\text{COMe}$ ), 169.9 ( $\text{C(O)}$ ), the remaining aromatic peaks were not detected and are believed to overlap with the observed signals; HRMS ( $\text{M}+\text{H}^+$ )(ESI $^+$ ) 359.1602 [ $\text{M} + \text{H}^+$ ]

## Supporting Information

(calcd for  $C_{19}H_{22}N_2O_5H^+$  359.1607); Anal. Calcd. for  $C_{19}H_{22}N_2O_5 \cdot 0.05H_2O$ : C, 63.51; H, 6.20; N, 7.80. Found: C, 63.24; H, 6.26; N, 7.72.

**Preparation of (*R*)-*N*-(4'-Methoxy)benzyl 2-*N*-(Benzyloxycarbonyl)amino-3-methoxypropionamide ((*R*)-105).**  $Ag_2O$  (11.60 g, 50.2 mmol) was added to a  $CH_3CN$  solution (100 mL) of (*R*)-*N*-(4'-methoxy)benzyl 2-*N*-(benzyloxycarbonyl)amino-3-hydroxypropionamide (3.60 g, 10.1 mmol) and  $CH_3I$  (6.3 mL, 101.0 mmol) at room temperature under Ar. The reaction mixture was stirred at room temperature (2 d), filtered through a pad of Celite<sup>®</sup>, and the filtrate concentrated in vacuo. The residue was dissolved in EtOAc (20 mL) and passed through a pad of silica gel (Dynamic Adsorbents Inc., Cat # 02826-25) using EtOAc (500 mL). The filtrate was concentrated in vacuo, and the solid was recrystallized with MeOH to obtain 2.61 g (70%) of (*R*)-*N*-(4'-methoxy)benzyl 2-*N*-(benzyloxycarbonyl)amino-3-methoxypropionamide as a white solid:  $R_f = 0.89$  (EtOAc); mp 128–130 °C;  $[\alpha]_D^{25} -14.7^\circ$  ( $c$  1.0, DMSO); IR (nujol) 3294, 3086, 2860, 1649, 1548, 1458, 1380, 1304, 1243, 1171, 1128, 1047, 963, 821, 698  $cm^{-1}$ ;  $^1H$  NMR ( $CDCl_3$ )  $\delta$  3.35 (s,  $OCH_3$ ), 3.48 (dd,  $J = 6.9, 9.3$  Hz,  $CHH'$ ), 3.79 (s,  $C_6H_4OCH_3$ ), 3.85 (dd,  $J = 3.9, 9.3$  Hz,  $CHH'$ ), 4.28–4.36 (br m,  $CHCH_2$ ), 4.40 (d,  $J = 5.7$  Hz,  $CH_2N$ ), 5.11 (s,  $OCH_2$ ), 5.60–5.72 (br s,  $OC(O)NH$ ), 6.58–6.68 (br s,  $CH_2NH$ ), 6.85 (d,  $J = 8.6$  Hz, 2 ArH), 7.17 (d,  $J = 8.6$  Hz, 2 ArH), 7.31–7.36 (m, 5 ArH);  $^{13}C$  NMR ( $CDCl_3$ )  $\delta$  43.1 ( $NCH_2$ ), 54.3 ( $OCH_2CH$ ), 55.3 (Ar $OCH_3$ ), 59.1 ( $OCH_3$ ), 67.2 (Ph $CH_2O$ ), 72.0 ( $OCH_2CH$ ), 114.1, 128.2, 128.3, 128.6, 128.9, 129.9, 136.1 (7 ArC), 159.1 ( $OC(O)$ ), 169.7 ( $C(O)$ ), the remaining aromatic peak was not detected and is believed to overlap with the observed signals; HRMS ( $M+H^+$ )(ESI<sup>+</sup>) 373.1765 [ $M + H^+$ ] (calcd for  $C_{20}H_{24}N_2O_5H^+$  373.1763); Anal. Calcd. for  $C_{20}H_{24}N_2O_5$ : 64.50; H, 6.50; N, 7.52. Found: C, 64.25; H, 6.50; N, 7.52.

**Preparation of (*R*)-*N*-(4'-Methoxy)benzyl 2-Acetamido-3-methoxypropionamide ((*R*)-35).** A MeOH solution (300 mL) of (*R*)-*N*-(4'-methoxy)benzyl 2-*N*-(benzyloxycarbonyl)amino-3-methoxypropionamide (2.40 g,



## Supporting Information

6.4 mmol) was treated with H<sub>2</sub> (1 atm) in presence of 10% Pd/C (480 mg) at room temperature (16 h). The mixture was carefully filtered through a bed of Celite<sup>®</sup> and the filtrate was evaporated in vacuo to obtain a colorless oil. The oil was dissolved in CH<sub>2</sub>Cl<sub>2</sub> (100 mL) and then triethylamine (1.1 mL, 7.74 mmol) and acetyl chloride (550 μL, 7.74 mmol) were carefully added at 0 °C and the resulting solution was stirred at room temperature (2 h). An aqueous 10% citric acid solution (100 mL) was added and the organic layer was extracted with CH<sub>2</sub>Cl<sub>2</sub> (3 x 100 mL). The organic layers were combined, washed with a saturated NaHCO<sub>3</sub> solution (100 mL), dried (MgSO<sub>4</sub>), and concentrated in vacuo. After trituration of the residue with EtOAc, (*R*)-*N*-(4'-methoxy)benzyl 2-acetamido-3-methoxypropionamide was obtained as a white solid (900 mg, 70%): *R<sub>f</sub>* = 0.82 (EtOAc); mp 146–147 °C; [ $\alpha$ ]<sub>D</sub><sup>25</sup> –26.0° (*c* 0.5, CHCl<sub>3</sub>); IR (nujol) 3283, 2861, 1642, 1520, 1458, 1377, 1299, 1255, 1176, 1127, 1031, 978, 719 cm<sup>-1</sup>; <sup>1</sup>H NMR (CDCl<sub>3</sub>) δ 2.02 (s, CH<sub>3</sub>CO), 3.37 (s, OCH<sub>3</sub>), 3.43 (dd, *J* = 7.8, 9.3 Hz, CHH'), 3.76–3.81 (m, CH<sub>3</sub>OC<sub>6</sub>H<sub>4</sub>, CHH'), 4.39 (d, *J* = 6.0 Hz, CH<sub>2</sub>N), 4.50–4.57 (m, CH), 6.49 (br d, *J* = 6.0 Hz, NHC(O)CH<sub>3</sub>), 6.71–6.82 (br t, CH<sub>2</sub>NH), 6.86 (d, *J* = 8.4 Hz, 2 ArH), 7.18 (d, *J* = 8.4 Hz, 2 ArH), addition of excess (*R*)-(-)-mandelic acid to a CDCl<sub>3</sub> solution of (*R*)-*N*-(4'-methoxy)benzyl 2-acetamido-3-methoxypropionamide gave only one signal for the acetyl methyl and one signal for the ether methyl protons; <sup>13</sup>C NMR (CDCl<sub>3</sub>) δ 23.2 (CH<sub>3</sub>CO), 43.0 (CH<sub>2</sub>N), 52.4 (CHCH<sub>2</sub>), 55.3 (C<sub>6</sub>H<sub>4</sub>OCH<sub>3</sub>), 59.0 (OCH<sub>3</sub>), 71.7 (CH<sub>2</sub>OCH<sub>3</sub>), 114.1, 128.8, 129.9, 159.0 (4 ArC), 169.8, 170.3 (2 C(O)); HRMS (M+Na<sup>+</sup>)(ESI<sup>+</sup>) 303.1320 [M + Na<sup>+</sup>] (calcd for C<sub>14</sub>H<sub>20</sub>N<sub>2</sub>O<sub>4</sub>Na<sup>+</sup> 303.1321); Anal. Calcd. for C<sub>14</sub>H<sub>20</sub>N<sub>2</sub>O<sub>4</sub>: C, 59.99; H, 7.19; N, 9.99. Found: C, 60.04; H, 7.32; N, 9.86.

### 28. Preparation of (*R*)-*N*-(4'-Chloro)benzyl 2-Acetamido-3-methoxypropionamide ((*R*)-36).

## Supporting Information

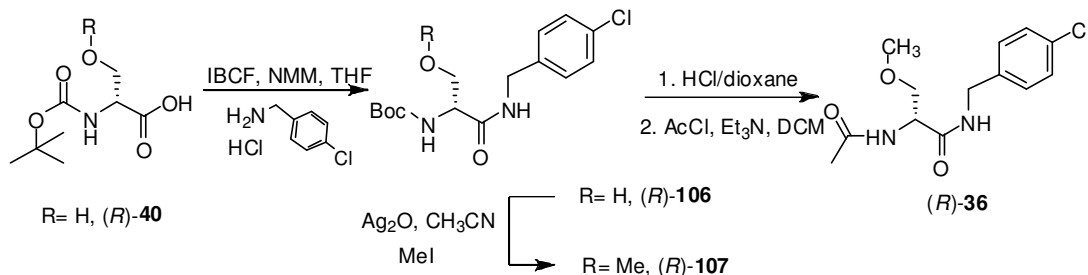

**Preparation of (*R*)-*N*-(4'-Chloro)benzyl 2-*N*-(*tert*-Butoxycarbonyl)amino-3-hydroxypropionamide ((*R*)-106).** A THF solution (400 mL) of (*R*)-*t*-Boc-serine (10.00 g, 48.8 mmol) was stirred and cooled at -78 °C under Ar and then 4-methylmorpholine (NMM) (6.4 mL, 58.5 mmol) was added dropwise. After 2 min of stirring at this temperature, isobutylchloroformate (IBCF) (7.6 mL, 58.5 mmol) was added dropwise leading to the precipitation of a white solid, and the reaction was allowed to proceed for additional 2 min and then 4-chlorobenzylamine (8.28 g, 58.5 mmol) was added portionwise at -78 °C. The mixture was allowed to stir at room temperature (2 h), and then the white solid filtered and the organic layer concentrated in vacuo. The residue was recrystallized with EtOAc to obtain (*R*)-*N*-(4'-chloro)benzyl 2-*N*-(*tert*-butoxycarbonyl)amino-3-hydroxypropionamide as a white solid (8.30 g, 52%):  $R_f = 0.76$  (EtOAc); mp 130–131 °C;  $[\alpha]_D^{26.2} +32.0^\circ$  ( $c$  1.0,  $\text{CHCl}_3$ ); IR (nujol) 3293, 2861, 1652, 1519, 1458, 1374, 1303, 1246, 1163, 1090, 1012, 848, 783  $\text{cm}^{-1}$ ;  $^1\text{H}$  NMR ( $\text{CDCl}_3$ )  $\delta$  1.42 (s,  $\text{C}(\text{CH}_3)_3$ ), 3.31–3.42 (br s, OH), 3.61–3.74 (m,  $\text{CHH}'$ ), 4.05–4.19 (m,  $\text{CHH}'$ , CH), 4.30–4.49 (br m,  $\text{CH}_2\text{N}$ ), 5.66 (br d,  $J = 7.2$  Hz, *t*-BocNH), 7.15–7.22 (br s,  $\text{CH}_2\text{NH}$ , 2 ArH), 7.27 (d,  $J = 8.7$  Hz, 2 ArH);  $^{13}\text{C}$  NMR ( $\text{CDCl}_3$ )  $\delta$  28.2( $\text{C}(\text{CH}_3)_3$ ), 42.6 ( $\text{NCH}_2$ ), 54.8 ( $\text{OCH}_2\text{CH}$ ), 62.7 ( $\text{OCH}_2\text{CH}$ ), 80.7 ( $\text{OCH}(\text{CH}_3)_3$ ), 128.7, 128.8, 133.3, 136.3 (4 ArC), 156.3 ( $\text{NC}(\text{O})\text{O}$ ), 171.4 ( $\text{C}(\text{O})$ ); HRMS ( $\text{M}+\text{H}^+$ )(ESI $^+$ ) 323.1267 [ $\text{M} + \text{H}^+$ ] (calcd for  $\text{C}_{15}\text{H}_{21}\text{ClN}_2\text{O}_4\text{H}^+$  323.1267); Anal. Calcd. for  $\text{C}_{15}\text{H}_{21}\text{ClN}_2\text{O}_4$ : C, 54.79; H, 6.44; Cl, 10.78; N, 8.52. Found: C, 54.96; H, 6.28; Cl, 10.91; N, 8.66.

## Supporting Information

**Preparation of (*R*)-*N*-(4'-Chloro)benzyl 2-*N*-(*tert*-Butoxycarbonyl)amino-3-methoxypropionamide ((*R*)-107).** Ag<sub>2</sub>O (28.50 g, 122.0 mmol) was added to a CH<sub>3</sub>CN solution (450 mL) of (*R*)-*N*-(4'-chloro)benzyl 2-*N*-(*tert*-butoxycarbonyl)amino-3-hydroxypropionamide (8.00 g, 24.4 mmol) and CH<sub>3</sub>I (15.2 mL, 244.0 mmol) at room temperature under Ar. The reaction mixture was stirred at room temperature in the dark (2 d), filtered through a pad of Celite<sup>®</sup>, and the filtrate concentrated in vacuo. The residue was recrystallized in EtOAc to obtain (*R*)-*N*-(4'-chloro)benzyl 2-*N*-(*tert*-butoxycarbonyl)amino-3-methoxypropionamide as a white solid (4.70 g, 56%): *R*<sub>f</sub> = 0.77 (EtOAc/hexanes 5/5); mp 74–75 °C; [α]<sup>24.5</sup><sub>D</sub> –20.1° (c 1.0, CHCl<sub>3</sub>); IR (nujol) 3327, 3255, 3181, 2966, 2903, 2728, 1660, 1529, 1458, 1374, 1301, 1245, 1162, 1093, 1018, 944, 862, 808, 777 cm<sup>-1</sup>; <sup>1</sup>H NMR (CDCl<sub>3</sub>) δ 1.43 (s, C(CH<sub>3</sub>)<sub>3</sub>), 3.37 (s, OCH<sub>3</sub>), 3.49 (dd, *J* = 6.3, 9.3 Hz, CHH'), 3.83 (dd, *J* = 3.9, 9.3 Hz, CHH'), 4.22–4.33 (br m, CHCH<sub>2</sub>), 4.38–4.51 (m, CH<sub>2</sub>N), 5.36–5.48 (br s, OC(O)NH), 6.82 (t, *J* = 5.4 Hz, CH<sub>2</sub>NH), 7.19 (d, *J* = 8.2 Hz, 2 ArH), 7.28 (d, *J* = 8.2 Hz, 2 ArH); <sup>13</sup>C NMR (CDCl<sub>3</sub>) δ 28.2 (C(CH<sub>3</sub>)<sub>3</sub>), 42.7 (NCH<sub>2</sub>), 54.0 (OCH<sub>2</sub>CH), 59.1 (OCH<sub>3</sub>), 72.0 (OCH<sub>2</sub>CH), 80.4 (OC(CH<sub>3</sub>)<sub>3</sub>), 128.7, 133.2, 136.6 (3 ArC), 155.5 (NC(O)O), 170.4 (C(O)), one signal was not detected and is believed to overlap with nearby peaks; HRMS (M+H<sup>+</sup>)(ESI<sup>+</sup>) 343.1424 [M + H<sup>+</sup>] (calcd for C<sub>16</sub>H<sub>23</sub>ClN<sub>2</sub>O<sub>4</sub>H<sup>+</sup> 343.1424); Anal. Calcd. for C<sub>16</sub>H<sub>23</sub>ClN<sub>2</sub>O<sub>4</sub>: C, 56.06; H, 6.77; Cl, 10.34; N, 8.17. Found: C, 56.19; H, 6.77; Cl, 10.07; N, 8.17.

**Preparation of (*R*)-*N*-(4'-Chloro)benzyl 2-Acetamido-3-methoxypropionamide ((*R*)-36).** A saturated HCl solution in dioxane (1 mmol/2 mL, 24.0 mL) was added to (*R*)-*N*-(4'-chloro)benzyl 2-*N*-(*tert*-butoxycarbonyl)amino-3-methoxypropionamide (4.10 g, 12.0 mmol) at 0 °C and the solution was stirred at room temperature (2 h). The reaction solution was concentrated in vacuo and dried (30 min).

The oil was dissolved in CH<sub>2</sub>Cl<sub>2</sub> (50 mL) and then triethylamine (5.0 mL, 36.00 mmol) and acetyl chloride (1.3 mL, 18.0 mmol) were carefully added at 0 °C and the resulting solution was stirred at room temperature (2 h). An aqueous

## Supporting Information

10% citric acid solution (50 mL) was added and the organic layer was extracted with CH<sub>2</sub>Cl<sub>2</sub> (3 x 50 mL). The organic layers were combined, washed with a saturated NaHCO<sub>3</sub> solution (50 mL), dried (MgSO<sub>4</sub>), and concentrated in vacuo. The solid was recrystallized with EtOAc to obtain (*R*)-*N*-(4'-chloro)benzyl 2-acetamido-3-methoxypropionamide (3.10 g, 80%) as a white solid: *R*<sub>f</sub> = 0.42 (EtOAc); mp 155 °C; [α]<sup>27.0</sup><sub>D</sub> -20.5° (c 1, CHCl<sub>3</sub>); IR (nujol) 3288, 3277, 3162, 2900, 1634, 1556, 1457, 1375, 1306, 1259, 1193, 1137, 1098, 1045, 964, 909, 801, 732 cm<sup>-1</sup>; <sup>1</sup>H NMR (CDCl<sub>3</sub>) δ 2.01 (s, CH<sub>3</sub>CO), 3.37 (s, OCH<sub>3</sub>), 3.43 (dd, *J* = 7.8, 9.2 Hz, CHH'), 3.78 (dd, *J* = 4.2, 9.2 Hz, CHH'), 4.34–4.49 (m, CH<sub>2</sub>N), 4.54–4.61 (m, CH), 6.54 (br d, *J* = 6.6 Hz, NHC(O)CH<sub>3</sub>), 6.94–7.03 (br t, CH<sub>2</sub>NH), 7.19 (d, *J* = 8.8 Hz, 2 ArH), 7.29 (d, *J* = 8.8 Hz, 2 ArH), addition of excess (*R*)-(-)-mandelic acid to a CDCl<sub>3</sub> solution of (*R*)-*N*-(4'-chloro)benzyl 2-acetamido-3-methoxypropionamide gave only one signal for the acetyl methyl and one signal for the ether methyl protons; <sup>13</sup>C NMR (CDCl<sub>3</sub>) δ 23.1 (CH<sub>3</sub>CO), 42.8 (CH<sub>2</sub>N), 52.5 (CHCH<sub>2</sub>), 59.1 (OCH<sub>3</sub>), 71.7 (CH<sub>2</sub>OCH<sub>3</sub>), 128.7, 133.2, 136.4, (3 ArC), 170.1, 170.4 (2 C(O)), one signal was not detected and is believed to overlap with nearby peaks; HRMS (M+H<sup>+</sup>)(ESI<sup>+</sup>) 285.1006 [M + H<sup>+</sup>] (calcd for C<sub>13</sub>H<sub>17</sub>ClN<sub>2</sub>O<sub>3</sub>H<sup>+</sup> 285.1006); Anal. Calcd. for C<sub>13</sub>H<sub>17</sub>ClN<sub>2</sub>O<sub>3</sub>: C, 54.84; H, 6.02; Cl, 12.45; N, 9.84. Found: C, 54.71; H, 5.95; Cl, 12.37; N, 9.76.

### 29. Preparation of (*R*)-*N*-(4'-Bromo)benzyl 2-Acetamido-3-methoxypropionamide ((*R*)-37).

## Supporting Information

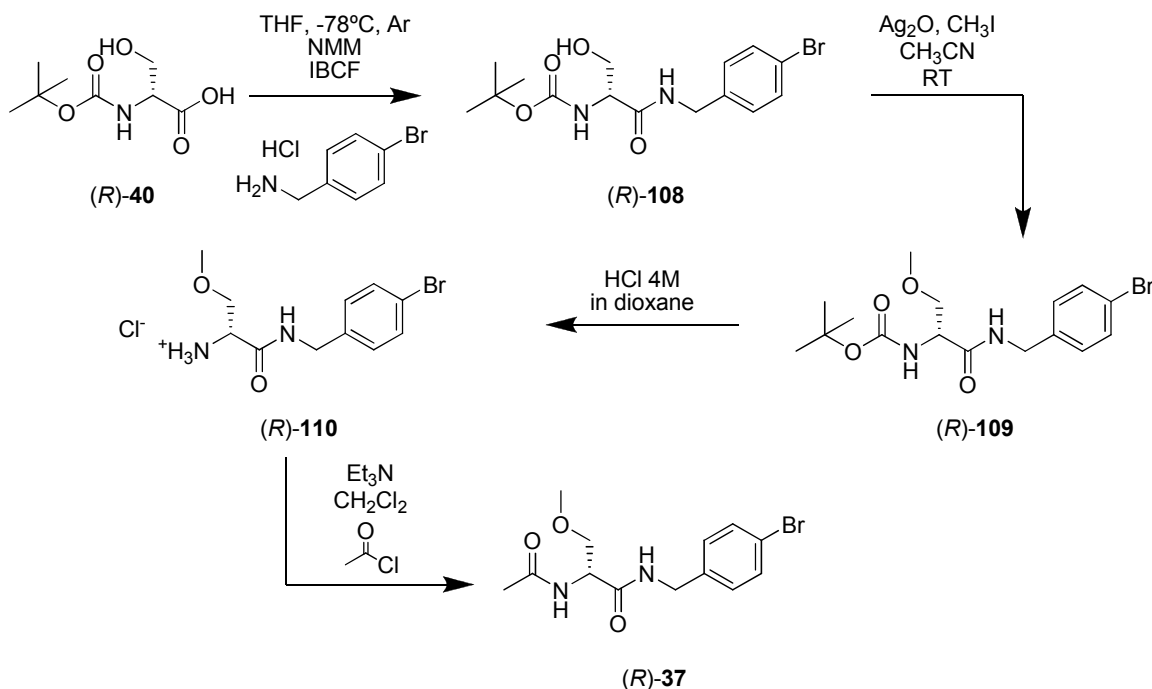

**Preparation of (*R*)-*N*-(4'-Bromo)benzyl 2-*N*-(*tert*-Butoxycarbonyl)amino-3-hydroxypropionamide (**(*R*)-108**).** A THF solution (180 mL) of (*R*)-Boc-serine (4.61 g, 22.47 mmol) was stirred and cooled at -78 °C under Ar, and then 4-methylmorpholine (NMM) (3.0 mL, 26.96 mmol) was added dropwise. After 2 minutes of stirring at this temperature, isobutylchloroformate (IBCF) (3.5 mL, 26.96 mmol) was added dropwise leading to the precipitation of a white solid, and the reaction was allowed to proceed for additional 2 minutes. Then a THF (50 mL) solution of 4-bromobenzylamine hydrochloride (6.00 g, 26.96 mmol) and NMM (3.2 mL, 29.21 mmol) was added portionwise at -78 °C. The mixture was stirred at -78 °C (5 min) and then at room temperature (2 h). The white solid was filtered and the organic layer was concentrated in vacuo. The residue was recrystallized with EtOAc to obtain (*R*)-*N*-(4'-bromo)benzyl 2-*N*-(*tert*-butoxycarbonyl)amino-3-hydroxypropionamide as a white solid (6.19 g, 74%): *R<sub>f</sub>* = 0.50 (7/3, EtOAc/hexanes); mp 132–133 °C; [α]<sup>25</sup><sub>D</sub> +30.5° (c 1.0, CHCl<sub>3</sub>); IR (nujol) 3319, 2955, 2912, 2861, 1653, 1522, 1458, 1374, 1304, 1249, 1165, 1073, 1014, 781, 658, 591, 552, 468 cm<sup>-1</sup>; <sup>1</sup>H NMR (DMSO-*d*<sub>6</sub>) δ 1.39 (s, C(CH<sub>3</sub>)<sub>3</sub>), 3.45–3.64 (m, CH<sub>2</sub>OH), 3.95–4.00 (m, CH), 4.18–4.32 (m, CH<sub>2</sub>N), 4.80–4.86 (br s, OH), 6.69 (d, *J* = 8.1 Hz, C(O)NH), 7.22 (d, *J* = 8.4 Hz, 2 ArH),

## Supporting Information

7.47 (d,  $J = 8.4$  Hz, 2 ArH), 8.38 (t,  $J = 6.0$  Hz, CH<sub>2</sub>NH); <sup>13</sup>C NMR (CDCl<sub>3</sub>) δ 28.2 (C(CH<sub>3</sub>)<sub>3</sub>), 42.7 (NCH<sub>2</sub>), 54.7 (OCH<sub>2</sub>CH), 62.7 (OCH<sub>2</sub>CH), 80.8 (C(CH<sub>3</sub>)<sub>3</sub>), 121.4, 129.1, 131.8, 136.8 (4 ArC), 156.4 (NC(O)O), 171.5 (C(O)); HRMS (+ESI) 395.08 [M+Na]<sup>+</sup> (100%), 397.03 [M+2+Na]<sup>+</sup> (100%) (calcd for C<sub>15</sub>H<sub>21</sub>BrN<sub>2</sub>O<sub>4</sub>Na<sup>+</sup> 395.06 [M+Na]<sup>+</sup>); Anal. Calcd for C<sub>15</sub>H<sub>21</sub>BrN<sub>2</sub>O<sub>4</sub>: C, 48.27; H, 5.67; Br, 21.41; N, 7.51. Found: C, 48.08, H, 5.63; Br, 21.41; N, 7.44.

**Preparation of (*R*)-*N*-(4'-Bromo)benzyl 2-*N*-(*tert*-Butoxycarbonyl)amino-3-methoxypropionamide ((*R*)-109).** Ag<sub>2</sub>O (18.60 g, 80.4 mmol) was added to a CH<sub>3</sub>CN solution (300 mL) of (*R*)-*N*-(4'-bromo)benzyl 2-*N*-(*tert*-butoxycarbonyl)amino-3-hydroxypropionamide (6.00 g, 16.0 mmol) and CH<sub>3</sub>I (10.0 mL, 160.8 mmol) at room temperature under Ar. The reaction mixture was stirred at room temperature in the dark (2 d), filtered through a Celite<sup>®</sup> pad, and the filtrate was concentrated in vacuo. The residue was purified by liquid chromatography on silica gel with EtOAc/hexanes (3/7 to 5/5) as the eluant to obtain (*R*)-*N*-(4'-bromo)benzyl 2-*N*-(*tert*-butoxycarbonyl)amino-3-methoxypropionamide as a white solid (2.34 g, 38%):  $R_f = 0.69$  (7/3, EtOAc/hexanes); mp 84–85 °C;  $[\alpha]_D^{25} -12.7^\circ$  (c 1.0, CHCl<sub>3</sub>); IR (nujol) 3426, 3258, 3055, 2978, 2932, 1672, 1527, 1372, 1260, 1166, 1122, 1018, 948, 864, 740, 641, 479 cm<sup>-1</sup>; <sup>1</sup>H NMR (CDCl<sub>3</sub>) δ 1.44 (s, C(CH<sub>3</sub>)<sub>3</sub>), 3.37 (s, OCH<sub>3</sub>), 3.49 (dd,  $J = 6.3, 9.2$  Hz, CHH'), 3.84 (dd,  $J = 3.6, 9.2$  Hz, CHH'), 4.20–4.32 (br s, CH), 4.43 (d,  $J = 4.2$  Hz, CH<sub>2</sub>N), 5.35–5.43 (br s, C(O)NH), 6.72–6.82 (br t, CH<sub>2</sub>NH), 7.14 (d,  $J = 8.6$  Hz, 2 ArH), 7.44 (d,  $J = 8.6$  Hz, 2 ArH); <sup>13</sup>C NMR (CDCl<sub>3</sub>) δ 28.2 (C(CH<sub>3</sub>)<sub>3</sub>), 42.7 (NCH<sub>2</sub>), 54.0 (OCH<sub>2</sub>CH), 59.1 (OCH<sub>3</sub>), 72.0 (OCH<sub>2</sub>CH), 80.4 (C(CH<sub>3</sub>)<sub>3</sub>), 121.2, 129.1, 131.7, 137.1 (4 ArC), 155.6 (NC(O)O), 170.4 (C(O)); HRMS (+ESI) 409.2 [M+Na]<sup>+</sup> (100%), 411.1 [M+2+Na]<sup>+</sup> (100%) (calcd for C<sub>16</sub>H<sub>23</sub>BrN<sub>2</sub>O<sub>4</sub>Na<sup>+</sup> 409.1 [M+Na]<sup>+</sup>); Anal. Calcd for C<sub>16</sub>H<sub>23</sub>BrN<sub>2</sub>O<sub>4</sub>: C, 49.62; H, 5.99; Br, 20.63; N, 7.23. Found: C, 49.82, H, 6.09; Br, 20.60; N, 7.15.

**Preparation of (*R*)-*N*-(4'-Bromo)benzyl 2-Amino-3-methoxypropionamide Hydrochloride ((*R*)-110).** HCl (4M in dioxane, 16 mL)

## Supporting Information

was added at 0 °C to (*R*)-*N*-(4'-bromo)benzyl 2-*N*-(*tert*-butoxycarbonyl)amino-3-methoxypropionamide (2.24 g, 5.78 mmol). The solution was stirred at room temperature overnight. The reaction was concentrated in vacuo, and triturated in Et<sub>2</sub>O to obtain (*R*)-*N*-(4'-bromo)benzyl 2-amino-3-methoxypropionamide hydrochloride as a white solid (1.18 g, 63%): *R*<sub>f</sub> = 0.13 (EtOAc); mp 165–167 °C; [α]<sup>25</sup><sub>D</sub> +1.2° (*c* 1.0, MeOH); IR (nujol) 3323, 2964, 2861, 2716, 1617, 2467, 1965, 1660, 1567, 14.61, 1374, 1265, 1133, 1017, 955, 798, 726, 648, 476, 432 cm<sup>-1</sup>; <sup>1</sup>H NMR (DMSO-*d*<sub>6</sub>) δ 3.30 (s, OCH<sub>3</sub>), 3.67–3.77 (m, CHCH<sub>2</sub>), 4.07 (t, *J* = 4.8 Hz, CH), 4.25–4.39 (m, NCH<sub>2</sub>), 7.25 (d, *J* = 8.4 Hz, 2 ArH), 7.53 (d, *J* = 8.4 Hz, 2 ArH), 8.26–8.42 (br s, NH<sub>3</sub><sup>+</sup>), 9.20 (t, *J* = 5.7 Hz, NH); <sup>13</sup>C NMR (DMSO-*d*<sub>6</sub>) δ 41.1 (NCH<sub>2</sub>), 51.6 (OCH<sub>2</sub>CH), 58.0 (OCH<sub>3</sub>), 69.9 (OCH<sub>2</sub>CH), 119.4, 128.9, 130.6, 137.7 (4 ArC), 166.0 (C(O)); HRMS (+ESI) 287.0 [M+H]<sup>+</sup> (100%), 289.1 [M+2+H]<sup>+</sup> (100%) (calcd for C<sub>11</sub>H<sub>15</sub>BrN<sub>2</sub>O<sub>2</sub>H<sup>+</sup> 287.0 [M+H]<sup>+</sup>); Anal. Calcd for C<sub>11</sub>H<sub>16</sub>BrClN<sub>2</sub>O<sub>2</sub>: C, 40.83; H, 4.98; Br, 24.69; Cl, 10.96; N, 8.66. Found: C, 40.71; H, 4.97; Br, 24.74; Cl, 11.06; N, 8.71.

**Preparation of (*R*)-*N*-(4'-Bromo)benzyl 2-Acetamido-3-methoxypropionamide ((*R*)-37).** (*R*)-*N*-(4'-Bromo)benzyl 2-amino-3-methoxypropionamide hydrochloride (1.00 g, 3.09 mmol) was dissolved in CH<sub>2</sub>Cl<sub>2</sub> (30 mL) and then Et<sub>3</sub>N (1.3 mL, 9.27 mmol) and acetyl chloride (0.3 mL, 3.71 mmol) were carefully added at 0 °C and the resulting solution was stirred at room temperature (2 h). An aqueous 10% citric acid solution (30 mL) was added and the organic layer was extracted with CH<sub>2</sub>Cl<sub>2</sub> (3 x 30 mL). The organic layers were combined, washed with an aqueous saturated NaHCO<sub>3</sub> solution (30 mL), dried (Na<sub>2</sub>SO<sub>4</sub>), and concentrated in vacuo. The residue was recrystallized with EtOAc to obtain (*R*)-*N*-(4'-bromo)benzyl 2-acetamido-3-methoxypropionamide as a white solid (690 mg, 68%): *R*<sub>f</sub> = 0.08 (7/3, EtOAc/hexanes); mp 159–161 °C; [α]<sup>25</sup><sub>D</sub> -15.9° (*c* 1.0, CHCl<sub>3</sub>); IR (nujol) 3272, 3093, 2919, 2860, 1634, 1555, 1457, 1375, 1306, 1254, 1197, 1135, 1046, 964, 907, 795, 740, 606, 550, 468 cm<sup>-1</sup>; <sup>1</sup>H NMR (CDCl<sub>3</sub>) δ 2.04 (C(O)CH<sub>3</sub>), 3.39 (s, OCH<sub>3</sub>), 3.43 (dd, *J* = 7.5, 9.0 Hz, CHH'), 3.81 (dd, *J* = 4.2, 9.0 Hz, CHH'), 4.37–4.48 (m, NCH<sub>2</sub>), 4.51–4.57 (m,

## Supporting Information

CH), 6.40–6.42 (br d, C(O)NH), 6.76–6.84 (br t, CH<sub>2</sub>NH), 7.14 (d, *J* = 8.6 Hz, 2 ArH), 7.45 (d, *J* = 8.6 Hz, 2 ArH), addition of excess (*R*)-(-)-mandelic acid to a CDCl<sub>3</sub> solution of (*R*)-*N*-(4'-bromo)benzyl 2-acetamido-3-methoxypropionamide gave only one signal for the acetyl methyl protons and one signal for the ether methyl protons; <sup>13</sup>C NMR (CDCl<sub>3</sub>) δ 23.1 (C(O)CH<sub>3</sub>), 42.8 (NCH<sub>2</sub>), 52.4 (OCH<sub>2</sub>CH), 59.1 (OCH<sub>3</sub>), 71.6 (OCH<sub>2</sub>CH), 121.3, 129.1, 131.7, 137.0 (4 ArC), 170.1, 170.4 (2 C(O)); LRMS (+ESI) 351.0 [M+Na]<sup>+</sup> (100%), 353.0 [M+2+Na]<sup>+</sup> (100%) (calcd for C<sub>13</sub>H<sub>17</sub>BrN<sub>2</sub>O<sub>3</sub>Na<sup>+</sup> 351.0 [M+Na]<sup>+</sup>); Anal. Calcd for C<sub>13</sub>H<sub>17</sub>BrN<sub>2</sub>O<sub>3</sub>: C, 47.43; H, 5.21; Br, 24.27; N, 8.51. Found: C, 47.47; H, 5.31; Br, 24.11; N, 8.41.

### 30. Preparation of (*R*)- and (*S*)-*N*-(4'-Iodo)benzyl 2-Acetamido-3-methoxypropionamide ((*R*)- and (*S*)-38).

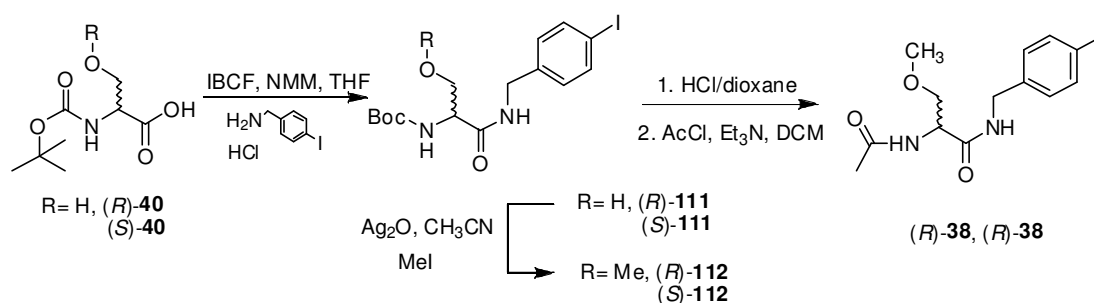

**Preparation of (*R*)-*N*-(4'-Iodo)benzyl 2-*N*-(*tert*-Butoxycarbonyl)amino-3-hydroxypropionamide ((*R*)-111).** A THF solution (240 mL) of (*R*)-*tert*-Boc-serine (6.00 g, 29.2 mmol) was stirred and cooled at -78 °C under Ar and then 4-methylmorpholine (NMM) (3.80 mL, 35.04 mmol) was added dropwise. The reaction was stirred at this temperature (2 min) and then isobutylchloroformate (IBCF) (4.6 mL, 35.04 mmol) was added dropwise leading to the precipitation of a white solid. The reaction was allowed to proceed for additional 2 min. A heterogeneous THF (10 mL) mixture of 4-iodobenzylamine hydrochloride (8.65 g, 32.60 mmol) and NMM (3.80 mL, 35.04 mmol) was added portionwise at -78 °C. The mixture was allowed to stir at room temperature (2 h) and the white solid



## Supporting Information

was filtered and the organic layer was concentrated in vacuum. The solid was recrystallized in EtOAc to obtain (*R*)-*N*-(4'-iodo)benzyl 2-*N*-(*tert*-butoxycarbonyl)amino-3-hydroxypropionamide (8.97 g, 73%) as a white solid:  $R_f = 0.60$  (EtOAc); mp 129–130 °C;  $[\alpha]_D^{24} +0.97^\circ$  (*c* 2.8, DMSO); IR (nujol) 3327, 1656, 1521, 1458, 1375, 1302, 1244, 1164, 1009  $\text{cm}^{-1}$ ;  $^1\text{H}$  NMR (DMSO- $d_6$ )  $\delta$  1.39 (s,  $(\text{CH}_3)_3\text{C}$ ), 3.49-3.60 (br m,  $\text{CHH}'\text{OH}$ ,  $\text{CHH}'\text{OH}$ ), 3.95-4.01 (br m,  $\text{CHCH}_2$ ), 4.18-4.31 (m,  $\text{CH}_2\text{N}$ ), 4.86 (br s,  $\text{OH}$ ), 6.68 (d,  $J = 7.8$  Hz, *tert*-BocNH), 7.08 (d,  $J = 8.1$  Hz, 2 ArH), 7.64 (d,  $J = 8.1$  Hz, 2 ArH), 8.37 (br s,  $\text{CH}_2\text{NH}$ );  $^{13}\text{C}$  NMR ( $\text{CDCl}_3$ )  $\delta$  28.2 ( $(\text{CH}_3)_3\text{C}$ ), 42.8 ( $\text{NCH}_2$ ), 54.7 ( $\text{OCH}_2\text{CH}$ ), 62.7 ( $\text{OCH}_2\text{CH}$ ), 80.8 ( $(\text{CH}_3)_3\text{C}$ ), 92.8 (C), 129.3, 137.5, 137.7 (3 ArC), 156.4 ( $\text{NC}(\text{O})\text{O}$ ), 171.5 ( $\text{C}(\text{O})$ ); HRMS ( $\text{M}+\text{Na}^+$ )(ESI $^+$ ) 443.0435 [ $\text{M} + \text{Na}^+$ ] (calcd for  $\text{C}_{15}\text{H}_{21}\text{IN}_2\text{O}_4\text{Na}^+$  443.0444); Anal. Calcd. for  $\text{C}_{15}\text{H}_{21}\text{IN}_2\text{O}_4$ : C, 42.87; H, 5.04; I, 30.20; N, 6.67. Found: C, 43.13; H, 5.14; I, 29.96; N, 6.71.

**Preparation of (*S*)-*N*-(4'-Iodo)benzyl 2-*N*-(*tert*-Butoxycarbonyl)amino-3-hydroxypropionamide ((*S*)-111).** Employing the same procedure for (*R*)-*N*-(4'-iodo)benzyl 2-*N*-(*tert*-butoxycarbonyl)amino-3-hydroxypropionamide and using (*S*)-*tert*-Boc-serine (1.72 g, 8.42 mmol), NMM (1.1 mL, 10.10 mmol), IBCF (1.3 mL, 10.10 mmol) and 4-iodobenzylamine hydrochloride (2.5 g, 9.26 mmol) in THF (400 mL) gave 2.51 g (71%) of the desired product as a white solid:  $R_f = 0.60$  (EtOAc); mp 129–130 °C;  $[\alpha]_D^{24} -0.93^\circ$  (*c* 2.8, DMSO); IR (nujol) 3324, 1652, 1520, 1373, 1301, 1246, 1163, 1008, 850, 779  $\text{cm}^{-1}$ ;  $^1\text{H}$  NMR (DMSO- $d_6$ )  $\delta$  1.39 (s,  $(\text{CH}_3)_3\text{C}$ ), 3.50–3.60 (br m,  $\text{CHH}'\text{OH}$ ,  $\text{CHH}'\text{OH}$ ), 3.94–4.02 (br m,  $\text{CHCH}_2$ ), 4.16–4.30 (m,  $\text{CH}_2\text{N}$ ), 4.83–4.87 (br s,  $\text{OH}$ ), 6.68 (d,  $J = 8.1$  Hz, *tert*-BocNH), 7.07 (d,  $J = 8.4$  Hz, 2 ArH), 7.64 (d,  $J = 8.4$  Hz, 2 ArH), 8.37 (t,  $J = 5.7$  Hz,  $\text{CH}_2\text{NH}$ );  $^{13}\text{C}$  NMR (DMSO- $d_6$ )  $\delta$  28.1 ( $(\text{CH}_3)_3\text{C}$ ), 41.4 ( $\text{NCH}_2$ ), 56.9 ( $\text{OCH}_2\text{CH}$ ), 61.7 ( $\text{OCH}_2\text{CH}$ ), 78.1 ( $(\text{CH}_3)_3\text{C}$ ), 92.1 (C), 129.3, 136.7, 139.3 (3 ArC), 155.1 ( $\text{NC}(\text{O})\text{O}$ ), 170.5 ( $\text{C}(\text{O})$ ); HRMS ( $\text{M}+\text{Na}^+$ )(ESI $^+$ ) 443.0445 [ $\text{M} + \text{Na}^+$ ] (calcd for  $\text{C}_{15}\text{H}_{21}\text{IN}_2\text{O}_4\text{Na}^+$  443.0444); Anal. Calcd. for  $\text{C}_{15}\text{H}_{21}\text{IN}_2\text{O}_4$ : C, 42.87; H, 5.04; ; I, 30.20; N, 6.67. Found: C, 43.08; H, 5.10; I, 29.94; N, 6.62.

## Supporting Information

**Preparation of (*R*)-*N*-(4'-Iodo)benzyl 2-*N*-(*tert*-Butoxycarbonyl)amino-3-methoxypropionamide ((*R*)-112).** Ag<sub>2</sub>O (20.63 g, 89.29 mmol) was added to a CH<sub>3</sub>CN solution (300 mL) of (*R*)-*N*-(4'-iodo)benzyl 2-*N*-(*tert*-butoxycarbonyl)amino-3-hydroxypropionamide (7.50 g, 17.86 mmol) and then CH<sub>3</sub>I (11.12 mL, 178.57 mmol) was added at room temperature under Ar. The reaction mixture was stirred at room temperature (3 d), filtered through a pad of Celite<sup>®</sup>, and the filtrate concentrated in vacuo. The residue was purified by column chromatography (SiO<sub>2</sub>; 2/3 EtOAc/hexanes) to obtain 5.80 g (75%) of a white solid: *R*<sub>f</sub> = 0.53 (1/1 EtOAc/hexanes); mp 86–87 °C; [α]<sup>23</sup><sub>D</sub> –3.4° (*c* 1.0, DMSO); IR (nujol) 3334, 1659, 1528, 1461, 1376, 1303, 1245, 1165, 1110, 1049, 954, 870, 788, 619 cm<sup>-1</sup>; <sup>1</sup>H NMR (CDCl<sub>3</sub>) δ 1.43 (s, (CH<sub>3</sub>)<sub>3</sub>C), 3.37 (s, OCH<sub>3</sub>) 3.48 (dd, *J* = 6.3, 9.3 Hz, CHH'OH), 3.84 (dd, *J* = 3.9, 9.3 Hz, CHH'OH), 4.20–4.28 (br m, CHCH<sub>2</sub>), 4.41 (d, *J* = 5.4 Hz, CH<sub>2</sub>N), 5.39 (br s, *tert*-BocNH), 6.75–6.80 (br t, CH<sub>2</sub>NH), 7.01 (d, *J* = 8.2 Hz, 2 ArH), 7.64 (d, *J* = 8.2 Hz, 2 ArH); <sup>13</sup>C NMR (CDCl<sub>3</sub>) δ 28.2 ((CH<sub>3</sub>)<sub>3</sub>C), 42.8 (NCH<sub>2</sub>), 54.0 (OCH<sub>2</sub>CH), 59.1 (OCH<sub>3</sub>), 71.9 (OCH<sub>2</sub>CH), 80.5 ((CH<sub>3</sub>)<sub>3</sub>C), 92.7 (CI), 129.3, 137.7, 137.8 (3 ArC), 155.5 (NC(O)O), 170.4 (NC(O)O); HRMS (M+H<sup>+</sup>)(ESI<sup>+</sup>) 435.0777 [M + H<sup>+</sup>] (calcd for C<sub>16</sub>H<sub>23</sub>I<sub>2</sub>N<sub>2</sub>O<sub>4</sub>H<sup>+</sup> 435.0781); Anal. Calcd. for C<sub>16</sub>H<sub>23</sub>I<sub>2</sub>N<sub>2</sub>O<sub>4</sub>: C, 44.25; H, 5.34; I, 29.22; N, 6.45;. Found: C, 44.51; H, 5.34; I, 28.99; N, 6.41.

**Preparation of (*S*)-*N*-(4'-Iodo)benzyl 2-*N*-(*tert*-Butoxycarbonyl)amino-3-methoxypropionamide ((*S*)-112).** Employing the preceding procedure and using (*S*)-*N*-(4'-iodo)benzyl 2-*N*-(*tert*-butoxycarbonyl)amino-3-hydroxypropionamide (8.50 g, 20.24 mmol), Ag<sub>2</sub>O (23.40 g, 101.20 mmol) and MeI (12.60 mL, 202.4 mmol) gave 7.56 g (85%) of (*S*)-*N*-(4'-iodo)benzyl 2-*N*-(*tert*-butoxycarbonyl)amino-3-methoxypropionamide as a white solid after trituration with Et<sub>2</sub>O: *R*<sub>f</sub> = 0.53 (1/1 EtOAc/hexanes); mp 87 °C; [α]<sup>23</sup><sub>D</sub> +3.3° (*c* 1.0, DMSO); IR (nujol) 3337, 2728, 1657, 1527, 1461, 1376, 1303, 1244, 1164, 1109, 1048, 953, 869, 787, 617 cm<sup>-1</sup>; <sup>1</sup>H NMR (DMSO-*d*<sub>6</sub>) δ 1.39 (s, (CH<sub>3</sub>)<sub>3</sub>C), 3.24 (s, OCH<sub>3</sub>) 3.47 (d, *J* = 6.0 Hz, CHH'OH, CHH'OH), 4.14–4.18 (br m, CHCH<sub>2</sub>), 4.20–4.25 (m, CH<sub>2</sub>N), 6.88 (d, *J* = 7.5 Hz, *tert*-BocNH), 7.05 (d, *J* = 8.2

## Supporting Information

Hz, 2 ArH), 7.64 (d,  $J = 8.2$  Hz, 2 ArH), 8.45 (t,  $J = 6.0$  Hz, CH<sub>2</sub>NH); <sup>13</sup>C NMR (DMSO-*d*<sub>6</sub>) δ 28.0 ((CH<sub>3</sub>)<sub>3</sub>C), 41.4 (NCH<sub>2</sub>), 54.2 (OCH<sub>2</sub>CH), 58.0 (OCH<sub>3</sub>), 71.8 (OCH<sub>2</sub>CH), 78.1 ((CH<sub>3</sub>)<sub>3</sub>C), 92.2 (C1), 129.3, 136.7, 139.2 (3 ArC), 155.1 (NC(O)O), 170.0 (C(O)); HRMS (M+H<sup>+</sup>)(ESI<sup>+</sup>) 435.0775 [M + H<sup>+</sup>] (calcd for C<sub>16</sub>H<sub>23</sub>I<sub>2</sub>O<sub>4</sub>H<sup>+</sup> 435.0781); Anal. Calcd. for C<sub>16</sub>H<sub>23</sub>I<sub>2</sub>O<sub>4</sub>: C, 44.25; H, 5.34; I, 29.22; N, 6.45;. Found: C, 44.54; H, 5.38; I, 28.92; N, 6.35.

**Preparation of (*R*)-*N*-(4'-Iodo)benzyl 2-Acetamido-3-methoxypropionamide ((*R*)-38).** A saturated HCl solution in dioxane (1 mmol/2 mL, 25.00 mL) was added to (*R*)-*N*-(4'-iodo)benzyl 2-*N*-(*tert*-butoxycarbonyl)amino-3-methoxypropionamide (5.50 g, 12.67 mmol) at 0 °C and the solution was stirred at room temperature (2 h). The reaction solution was concentrated in vacuo and dried (30 min). CH<sub>2</sub>Cl<sub>2</sub> (50 mL) was added to the residue followed by the successive additions of Et<sub>3</sub>N (10.66 mL, 76.02 mmol) and AcCl (2.70 mL, 38.01 mmol) at 0 °C. The mixture was stirred at room temperature (2 h), aqueous 10% citric acid was added, and then the organic layer was separated. The aqueous layer was washed with CH<sub>2</sub>Cl<sub>2</sub> (2 x 50 mL). The organic layers were combined, washed with aqueous saturated NaHCO<sub>3</sub> (50 mL) and H<sub>2</sub>O (50 mL), dried (MgSO<sub>4</sub>), and concentrated in vacuo. The solid was recrystallized with EtOAc to obtain (*R*)-*N*-(4'-iodo)benzyl 2-acetamido-3-methoxypropionamide (3.40 g, 71%) as a white solid:  $R_f = 0.76$  (5/5 acetone/EtOAc); mp 159–160 °C;  $[\alpha]_D^{25} = +3.3^\circ$  ( $c$  1.0, DMSO); IR (nujol) 3279, 1636, 1552, 1457, 1375, 1305, 1139, 725 cm<sup>-1</sup>; <sup>1</sup>H NMR (CDCl<sub>3</sub>) δ 2.02 (s, CH<sub>3</sub>CO), 3.38 (s, OCH<sub>3</sub>), 3.44 (dd,  $J = 7.2, 9.0$  Hz, CHH'), 3.79 (dd,  $J = 4.2, 9.0$  Hz, CHH'), 4.38–4.41 (m, CH<sub>2</sub>N), 4.52–4.59 (m, NC(H)CO), 6.46 (br d,  $J = 6.6$  Hz, NHC(O)CH<sub>3</sub>), 6.85–6.93 (br t, CH<sub>2</sub>NH), 7.00 (d,  $J = 8.4$  Hz, 2 ArH), 7.64 (d,  $J = 8.4$  Hz, 2 ArH), addition of excess (*R*)-(-)-mandelic acid to a CDCl<sub>3</sub> solution of (*R*)-*N*-(4'-iodo)benzyl 2-acetamido-3-methoxypropionamide gave only one signal for the acetyl methyl and one signal for the ether methyl protons; <sup>13</sup>C NMR (CDCl<sub>3</sub>) δ 23.1 (CH<sub>3</sub>CO), 42.9 (CH<sub>2</sub>N), 52.4 (CHCH<sub>2</sub>), 59.1 (OCH<sub>3</sub>), 71.6 (CH<sub>2</sub>OCH<sub>3</sub>), 92.7 (C1), 129.3, 137.7, 139.1 (3 ArC), 170.1, 170.3 (2 C(O)); HRMS

## Supporting Information

(M+Na<sup>+</sup>)(ESI<sup>+</sup>) 399.0177 [M + Na<sup>+</sup>] (calcd for C<sub>13</sub>H<sub>17</sub>IN<sub>2</sub>O<sub>3</sub>Na<sup>+</sup> 399.0182); Anal. Calcd. for C<sub>13</sub>H<sub>17</sub>IN<sub>2</sub>O<sub>3</sub>: C, 41.51; H, 4.55; I, 33.73; N, 7.45. Found: C, 41.70; H, 4.49; I, 33.69; N, 7.39.

**Preparation of (S)-N-(4'-Iodo)benzyl 2-Acetamido-3-methoxypropionamide ((S)-38).** Employing the preceding procedure and using (S)-2-N-(4'-iodo)benzyl 2-N-(*tert*-butoxycarbonyl)amino-3-methoxypropionamide (3.70 g, 8.52 mmol), saturated dioxane solution of HCl (1 mmol/2 mL, 17 mL), Et<sub>3</sub>N (3.6 mL, 25.60 mmol) and AcCl (906  $\mu$ L, 12.30 mmol) gave 2.43 g (76%) of (S)-N-(4'-iodo)benzyl 2-acetamido-3-methoxypropionamide as a white solid after recrystallization with EtOAc:  $R_f = 0.76$  (5/5 acetone/EtOAc); mp 159–160 °C;  $[\alpha]_D^{24} = -3.2^\circ$  ( $c$  1.0, DMSO); IR (nujol) 3278, 1636, 1552, 1458, 1375, 1305, 1138, 725 cm<sup>-1</sup>; <sup>1</sup>H NMR (CDCl<sub>3</sub>)  $\delta$  2.02 (s, CH<sub>3</sub>CO), 3.38 (s, OCH<sub>3</sub>), 3.43 (dd,  $J = 7.2, 9.0$  Hz, CHH'), 3.79 (dd,  $J = 4.2, 9.0$  Hz, CHH'), 4.38–4.42 (m, CH<sub>2</sub>N), 4.53–4.59 (m, NC(H)CO), 6.47 (br d,  $J = 6.0$  Hz, NHC(O)CH<sub>3</sub>), 6.85–6.93 (br t, CH<sub>2</sub>NH), 7.00 (d,  $J = 8.4$  Hz, 2 ArH), 7.64 (d,  $J = 8.4$  Hz, 2 ArH), addition of excess (*R*)-(-)-mandelic acid to a CDCl<sub>3</sub> solution of (S)-N-(4'-Iodo)benzyl 2-acetamido-3-methoxypropionamide gave only one signal for the acetyl methyl and one signal for the ether methyl protons; <sup>13</sup>C NMR (DMSO-*d*<sub>6</sub>)  $\delta$  22.4 (CH<sub>3</sub>CO), 41.4 (CH<sub>2</sub>N), 52.5 (CHCH<sub>2</sub>), 58.1 (OCH<sub>3</sub>), 71.9 (CH<sub>2</sub>OCH<sub>3</sub>), 92.2 (C1), 129.3, 136.8, 139.1 (3 ArC), 169.3, 169.7 (2 C(O)); HRMS (M+Na<sup>+</sup>)(ESI<sup>+</sup>) 399.0177 [M + Na<sup>+</sup>] (calcd for C<sub>13</sub>H<sub>17</sub>IN<sub>2</sub>O<sub>3</sub>Na<sup>+</sup> 399.0182); Anal. Calcd. for C<sub>13</sub>H<sub>17</sub>IN<sub>2</sub>O<sub>3</sub>: C, 41.51; H, 4.55; I, 33.73; N, 7.45. Found: C, 41.37; H, 4.52; I, 33.47; N, 7.37.

**31. Preparation of (R)-N-(4'-Sulfamoyl)benzyl 2-Acetamido-3-methoxypropionamide ((R)-39).**

## Supporting Information

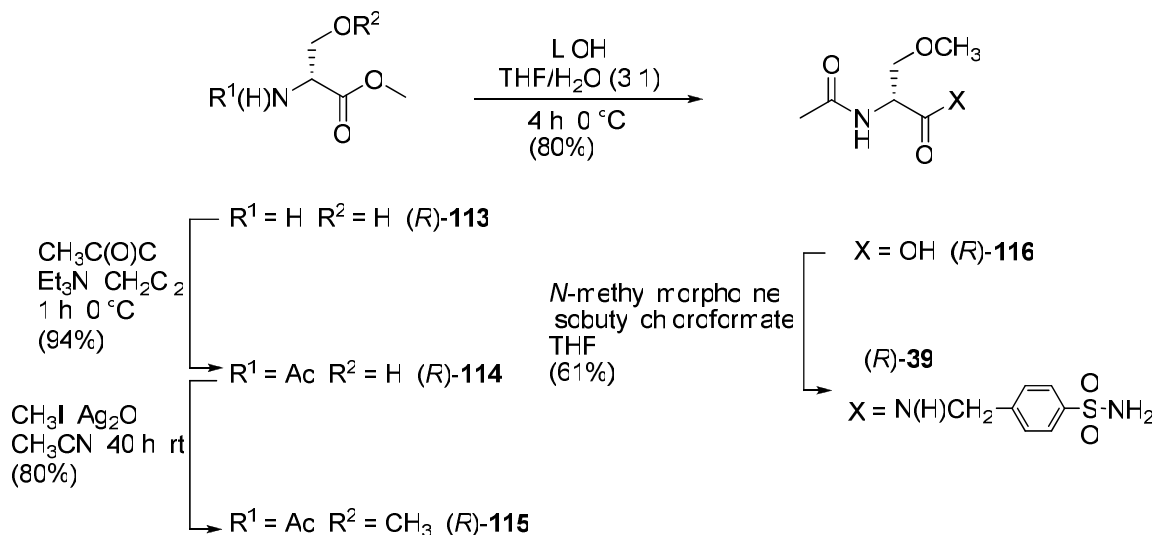

**Preparation of (*R*)-Methyl 2-Acetamido-3-hydroxypropionate ((*R*)-114).**<sup>8</sup> To a solution of D-serine methyl ester hydrochloride ((*R*)-113) (10.00 g, 64.27 mmol) and  $Et_3N$  (18.81 mL, 134.97 mmol) in  $CH_2Cl_2$  (200 mL) at  $0^\circ C$  was added acetyl chloride (4.77 mL, 67.48 mmol). After the mixture was allowed to stir at  $0^\circ C$  (1 h) under Ar, the solvent was evaporated in vacuo and EtOAc (150 mL) was added. The mixture was filtered and the filtrate evaporated in vacuo. The residue was purified by column chromatography ( $SiO_2$ ; 1/9 MeOH/ $CHCl_3$ ) to yield 9.73 g (94%) of (*R*)-methyl 2-acetamido-3-hydroxypropionate as a yellow oil:  $R_f = 0.35$  (1/9 MeOH/ $CHCl_3$ );  $[\alpha]_D^{25} -10.1^\circ$  ( $c$  1.9, MeOH);  $^1H$  NMR (DMSO- $d_6$ )  $\delta$  1.86 (s,  $CH_3C(O)$ ), 3.55–3.71 (m,  $CH_2OH, OCH_3$ ), 4.29–4.35 (m, CH), 5.08 (t,  $J = 5.7$  Hz, OH), 8.19 (d,  $J = 7.5$  Hz, NH);  $^{13}C$  NMR (DMSO- $d_6$ )  $\delta$  22.3 ( $CH_3C(O)$ ), 51.8 ( $C(O)OCH_3$ ), 54.7 (CH), 61.3 ( $CH_2OH$ ), 169.5, 171.3 (2  $C(O)$ ).

**Preparation of (*R*)-Methyl 2-Acetamido-3-methoxypropionate ((*R*)-115).**<sup>9</sup>  $Ag_2O$  (45.34 g, 195.65 mmol) was added to a  $CH_3CN$  solution (500 mL) of (*R*)-methyl 2-acetamido-3-hydroxypropionate (9.00 g, 55.90 mmol) and  $CH_3I$  (24.41 mL, 391.30 mmol) at room temperature under Ar. The reaction mixture was stirred at room temperature in the dark (5 d), filtered through a pad of Celite<sup>®</sup>, and the filtrate concentrated in vacuo. The product was purified by column chromatography (1/15 MeOH/ $CHCl_3$ ) to obtain 7.86 g (80%) of (*R*)-methyl 2-acetamido-3-methoxypropionate as a white solid:  $R_f = 0.50$  (1/15

## Supporting Information

MeOH/CHCl<sub>3</sub>); mp 75–77 °C (lit.<sup>9</sup> mp 76–78 °C); [ $\alpha$ ]<sub>D</sub><sup>25</sup> +7.2° (c 1.0, MeOH) (lit.<sup>9</sup> [ $\alpha$ ]<sub>D</sub><sup>23</sup> +7.8 (c 1.0, MeOH)); <sup>1</sup>H NMR (CDCl<sub>3</sub>)  $\delta$  2.06 (s, CH<sub>3</sub>C(O)), 3.35 (s, CH<sub>2</sub>OCH<sub>3</sub>), 3.61 (dd, *J* = 3.3, 9.3 Hz, CHH'OCH<sub>3</sub>), 3.78 (s, C(O)OCH<sub>3</sub>), 3.82 (dd, *J* = 3.0, 9.3 Hz, CHH'OCH<sub>3</sub>), 4.72–4.77 (m, CH), 6.40 (d, *J* = 6.6 Hz, NH), addition of excess (*R*)-(-)-mandelic acid to a CDCl<sub>3</sub> solution of (*R*)-methyl 2-acetamido-3-methoxypropanoate gave two signals each for the acetyl methyl protons and the ether methyl protons in a ratio of 93:7; <sup>13</sup>C NMR (CDCl<sub>3</sub>)  $\delta$  23.3 (CH<sub>3</sub>C(O)), 52.7 (CH, C(O)OCH<sub>3</sub>), 59.4 (CH<sub>2</sub>OCH<sub>3</sub>), 72.4 (CH<sub>2</sub>OCH<sub>3</sub>), 170.1, 171.0 (2 C(O)); HRMS (M+H<sup>+</sup>)(ESI<sup>+</sup>) 176.0918 [M + H<sup>+</sup>] (calcd. for C<sub>7</sub>H<sub>14</sub>NO<sub>4</sub> 176.0923).

### Preparation of (*R*)-2-Acetamido-3-methoxypropionic Acid ((*R*)-116).<sup>9</sup>

(*R*)-Methyl 2-acetamido-3-methoxypropionate (3.50 g, 20.00 mmol) was dissolved in THF (60 mL) and cooled to 0 °C, and an aqueous 1 M solution (20 mL) of LiOH (20.00 mmol) was added. The reaction solution was stirred at 0 °C (4 h) and then concentrated in vacuo. The resulting aqueous phase was diluted with H<sub>2</sub>O (50 mL) and washed with Et<sub>2</sub>O (2 × 50 mL). The aqueous layer was acidified to pH 1-2 with aqueous 1 M HCl, and extracted with EtOAc (6 × 50 mL). The combined organic phases was dried (Na<sub>2</sub>SO<sub>4</sub>), evaporated in vacuo, and then recrystallized (EtOAc/hexanes) to yield 1.30 g of (*R*)-2-acetamido-3-methoxypropionic acid (40%) as a white solid: *R*<sub>f</sub> = 0.10 (1/4 MeOH/CHCl<sub>3</sub>); mp 136–138 °C; [ $\alpha$ ]<sub>D</sub><sup>25</sup> -21.0° (c 1.0, MeOH) (lit.<sup>9</sup> [ $\alpha$ ]<sub>D</sub><sup>23</sup> -16.9 (c 1.2, MeOH) for an 85:15 mixture of (*R*)- and (*S*)-acids); <sup>1</sup>H NMR (DMSO-*d*<sub>6</sub>)  $\delta$  1.86 (s, CH<sub>3</sub>C(O)), 3.25 (s, CH<sub>2</sub>OCH<sub>3</sub>), 3.49 (dd, *J* = 4.1, 9.8 Hz, CHH'OCH<sub>3</sub>), 3.63 (dd, *J* = 5.9, 9.8 Hz, CHH'OCH<sub>3</sub>), 4.38–4.44 (m, CH), 8.19 (d, *J* = 8.1 Hz, NH); <sup>13</sup>C NMR (DMSO-*d*<sub>6</sub>)  $\delta$  22.3 (CH<sub>3</sub>C(O)), 52.1 (CH), 58.3 (CH<sub>2</sub>OCH<sub>3</sub>), 71.8 (CH<sub>2</sub>OCH<sub>3</sub>), 169.3, 171.6 (2 C(O)); Anal. Calcd. for C<sub>6</sub>H<sub>11</sub>NO<sub>4</sub>: C, 44.72%; H, 6.88%; N, 8.69%. Found: C, 44.71%; H, 6.74%; N, 8.66%. Concentration of the recrystallization mother liquid led to an additional 1.28 g of (*R*)- and (*S*)-2-acetamido-3-methoxypropanoic acid

## Supporting Information

(40%, 92:8 enantiomer mixture) as a white sticky foam:  $[\alpha]_{\text{D}}^{25} -18.7^{\circ}$  (c 1.0, MeOH).

**Preparation of (*R*)-*N*-(4'-Sulfamoyl)benzyl 2-Acetamido-3-methoxypropionamide ((*R*)-39).** To an anhydrous THF solution (30 mL) of (*R*)- and (*S*)-2-acetamido-3-methoxypropionic acid (92:8 enantiomer mixture) (1.00 g, 6.21 mmol) at  $-78^{\circ}\text{C}$  was added 4-methylmorpholine (NMM) (1.50 mL, 13.66 mmol). The solution was stirred (5 min), followed by the addition of isobutyl chloroformate (1.03 mL, 7.89 mmol). This mixture was stirred (5 min) and then methyl 4-(aminomethyl)benzenesulfonamide hydrochloride (2.07 g, 9.32 mmol) was added. The reaction mixture was stirred at room temperature (1.5 h), and filtered. The product was purified by column chromatography (1/7 MeOH/ $\text{CHCl}_3$ ) and then recrystallized (MeOH/ $\text{CHCl}_3$ ) to yield 1.25 g (61%) of (*R*)-*N*-(4'-sulfamoyl)benzyl 2-acetamido-3-methoxypropionamide as a white solid:  $R_f = 0.35$  (1/7 MeOH/ $\text{CHCl}_3$ ); mp  $177-179^{\circ}\text{C}$ ;  $[\alpha]_{\text{D}}^{25} +10.7^{\circ}$  (c 1.0, MeOH); IR (nujol) 3293, 2935, 1623, 1557, 1459  $\text{cm}^{-1}$ ;  $^1\text{H}$  NMR ( $\text{DMSO}-d_6$ )  $\delta$  1.87 (s,  $\text{CH}_3(\text{O})$ ), 3.26 (s,  $\text{CH}_2\text{OCH}_3$ ), 3.46–3.56 (m,  $\text{CH}_2\text{OCH}_3$ ), 4.34 (d,  $J = 6.1$  Hz,  $\text{CH}_2\text{Ar}$ ), 4.43–4.50 (m,  $\text{CH}$ ), 7.31 (s,  $\text{NH}_2$ ), 7.41 (d,  $J = 8.6$  Hz, 2  $\text{ArH}$ ), 7.75 (d,  $J = 8.6$  Hz, 2  $\text{ArH}$ ), 8.13 (d,  $J = 7.8$  Hz,  $\text{NHCH}$ ), 8.59 (t,  $J = 6.1$  Hz,  $\text{NHCH}_2$ );  $^{13}\text{C}$  NMR ( $\text{DMSO}-d_6$ )  $\delta$  22.5 ( $\text{CH}_3(\text{O})$ ), 41.7 ( $\text{CH}_2\text{Ar}$ ), 52.7 ( $\text{CH}$ ), 58.2 ( $\text{CH}_2\text{OCH}_3$ ), 72.0 ( $\text{CH}_2\text{OCH}_3$ ), 125.5, 127.2, 142.5, 143.5 (4  $\text{ArC}$ ), 169.5, 169.9 (2  $\text{C}(\text{O})$ ); HRMS ( $\text{M}+\text{H}^+$ )( $\text{ESI}^+$ ) 330.1117 [ $\text{M} + \text{H}^+$ ] (calcd. for  $\text{C}_{13}\text{H}_{20}\text{N}_3\text{O}_5\text{S}$  330.1124); Anal. Calcd. for  $\text{C}_{13}\text{H}_{19}\text{N}_3\text{O}_5\text{S}$ : C, 47.71; H, 5.81; N, 12.76; S, 9.74. Found: C, 47.43; H, 5.95; N, 12.77; S, 9.77.

**32. Preparation of (*R*)-*N*-(3',4'-Dichloro)benzyl 2-Acetamido-3-methoxypropionamide ((*R*)-60).**

## Supporting Information

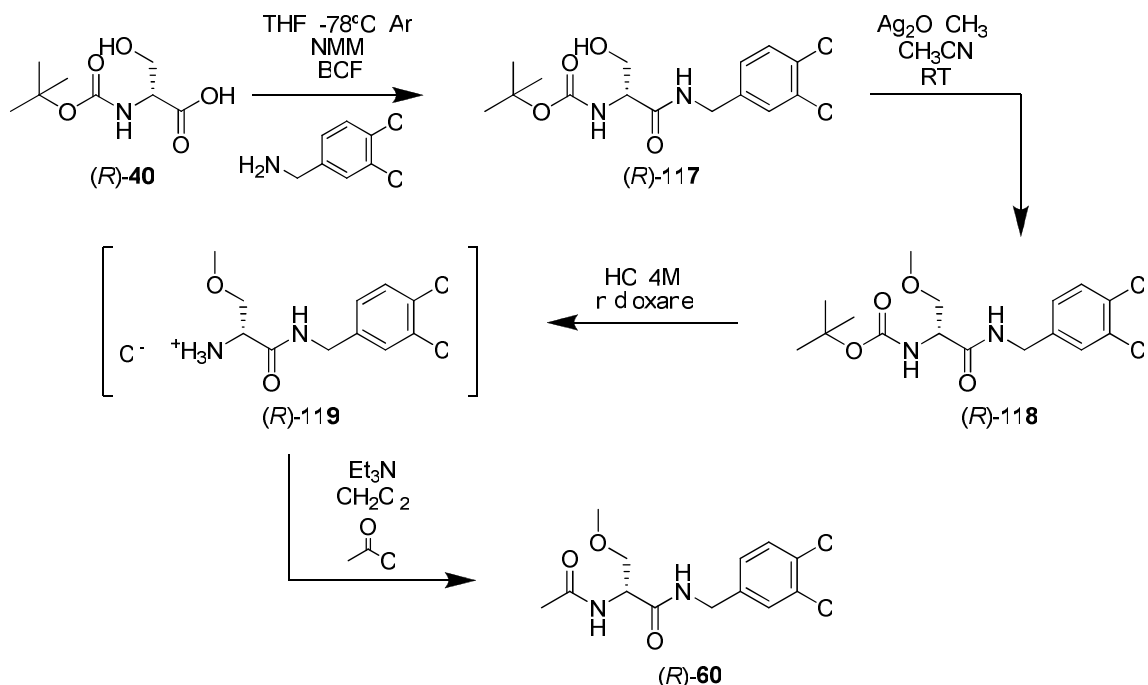

### Preparation of (*R*)-*N*-(3',4'-Dichloro)benzyl 2-*N*-(*tert*-

**Butoxycarbonyl)amino-3-hydroxypropionamide ((*R*)-117). A THF solution (250 mL) of (*R*)-Boc-serine (6.00 g, 29.2 mmol) was stirred and cooled at -78 °C under Ar, and then 4-methylmorpholine (NMM) (3.8 mL, 35.1 mmol) was added dropwise. After 2 min of stirring at this temperature, isobutylchloroformate (IBCF) (4.6 mL, 35.1 mmol) was added dropwise leading to the precipitation of a white solid, and the reaction was allowed to proceed for an additional 2 min. Then, 3,4-dichlorobenzylamine (4.8 mL, 35.1 mmol) was added portionwise at -78 °C. The mixture was stirred at -78 °C (5 min) and then at room temperature (2 h). The white solid was filtered and the organic layer was concentrated in vacuo. The residue was recrystallized with EtOAc to obtain (*R*)-*N*-(3',4'-dichloro)benzyl 2-*N*-(*tert*-butoxycarbonyl)amino-3-hydroxypropionamide as a white solid (5.84 g, 55%):  $R_f = 0.25$  (EtOAc/hexanes, 7/3); mp = 130 °C;  $[\alpha]^{24.6}_D +39.3^\circ$  ( $c$  1.0, CHCl<sub>3</sub>); IR (nujol) 2934, 1656, 1517, 1458, 1375, 1303, 1247, 1159, 1031, 867, 720, 660, 572, 464 cm<sup>-1</sup>; <sup>1</sup>H NMR (DMSO-*d*<sub>6</sub>) δ 1.40 (s, C(CH<sub>3</sub>)<sub>3</sub>), 3.56–3.59 (m, CH<sub>2</sub>OH), 3.94–4.00 (m, CH), 4.28 (d,  $J = 6.3$  Hz, CH<sub>2</sub>N), 4.88 (t,  $J = 5.9$  Hz, OH), 6.75 (d,  $J = 7.8$  Hz, C(O)NH), 7.25 (dd,  $J = 1.8, 8.4$  Hz, 1 ArH), 7.52–7.56 (m, 2 ArH), 8.44 (t,  $J = 6.3$  Hz, CH<sub>2</sub>NH); <sup>13</sup>C NMR (CDCl<sub>3</sub>) δ 28.4 (C(CH<sub>3</sub>)<sub>3</sub>), 42.3**



## Supporting Information

(NCH<sub>2</sub>), 55.0 (OCH<sub>2</sub>CH), 62.8 (OCH<sub>2</sub>CH), 81.0 (C(CH<sub>3</sub>)<sub>3</sub>), 126.9, 129.4, 130.7, 131.7, 132.9, 138.3 (6 ArC), 156.5 (NC(O)O), 171.7 (C(O)); LRMS (ESI<sup>+</sup>) 385.04 [M+Na<sup>+</sup>, 100%], 387.04 [M+2+Na<sup>+</sup>, 63%], 389.04 [M+4+Na<sup>+</sup>, 14%], (calcd for C<sub>15</sub>H<sub>20</sub>Cl<sub>2</sub>N<sub>2</sub>O<sub>4</sub> Na<sup>+</sup> 385.07); Anal. Calcd. for C<sub>15</sub>H<sub>20</sub>Cl<sub>2</sub>N<sub>2</sub>O<sub>4</sub>: C, 49.60; H, 5.55; Cl, 19.52; N, 7.71. Found: C, 49.62, H, 5.54; Cl, 19.65; N, 7.70.

**Preparation of (*R*)-*N*-(3',4'-Dichloro)benzyl 2-*N*-(*tert*-Butoxycarbonyl)amino-3-methoxypropionamide ((*R*)-118).** Ag<sub>2</sub>O (16.00 g, 68.8 mmol) was added to a CH<sub>3</sub>CN solution (250 mL) of (*R*)-*N*-(3',4'-dichloro)benzyl 2-*N*-(*tert*-butoxycarbonyl)amino-3-hydroxypropionamide (5.00 g, 13.8 mmol) and CH<sub>3</sub>I (8.6 mL, 137.3 mmol) at room temperature under Ar. The reaction mixture was stirred at room temperature in the dark (2 d), filtered through a Celite<sup>®</sup> pad, and the filtrate was concentrated in vacuo to obtain (*R*)-*N*-(3',4'-dichloro)benzyl 2-*N*-(*tert*-butoxycarbonyl)amino-3-methoxypropionamide as a white foam (5.10 g, 98%): *R*<sub>f</sub> = 0.73 (EtOAc/hexanes, 7/3); mp = 71 °C; [α]<sup>24.7</sup><sub>D</sub> -18.4° (c 1.0, CHCl<sub>3</sub>); IR (nujol) 3295, 2958, 2912, 2728, 2359, 1658, 1525, 1458, 1374, 1305, 1247, 1159, 1030, 950, 864, 812, 719, 649, 542, 440 cm<sup>-1</sup>; <sup>1</sup>H NMR (CDCl<sub>3</sub>) δ 1.44 (s, C(CH<sub>3</sub>)<sub>3</sub>), 3.39 (s, OCH<sub>3</sub>), 3.48–3.53 (m, CHH'), 3.82–3.86 (m, CHH'), 4.28 (br s, CH), 4.43 (d, *J* = 5.7 Hz, CH<sub>2</sub>N), 5.43 (br s, NH), 6.91 (br s, NH), 7.09 (br d, *J* = 8.1 Hz, 1 ArH), 7.36–7.39 (m, 2 ArH); <sup>13</sup>C NMR (CDCl<sub>3</sub>) δ 28.2 (C(CH<sub>3</sub>)<sub>3</sub>), 42.2 (NCH<sub>2</sub>), 54.2 (OCH<sub>2</sub>CH), 59.1 (OCH<sub>3</sub>), 72.0 (OCH<sub>2</sub>CH), 80.5 (C(CH<sub>3</sub>)<sub>3</sub>), 126.6, 129.1, 130.5, 131.3, 132.7, 138.4 (6 ArC), 155.5 (NC(O)O), 170.6 (C(O)); HRMS (ESI<sup>+</sup>) 377.1035 [M+H<sup>+</sup>, 100%], 379.1004 [M+2+H<sup>+</sup>, 63%], 381.0973 [M+4+H<sup>+</sup>, 19%] (calcd for C<sub>16</sub>H<sub>22</sub>Cl<sub>2</sub>N<sub>2</sub>O<sub>4</sub> H<sup>+</sup> 377.1029); Anal. Calcd. for C<sub>16</sub>H<sub>22</sub>Cl<sub>2</sub>N<sub>2</sub>O<sub>4</sub>•0.05EtOAc: C, 50.98; H, 5.92; Cl, 18.57; N, 7.34. Found: C, 51.36, H, 5.95; Cl, 18.20; N, 7.35.

**Preparation of (*R*)-*N*-(3',4'-dichloro)benzyl 2-Amino-3-methoxypropionamide Hydrochloride ((*R*)-119).** HCl (4 M in dioxane, 24 mL) was added at 0 °C to (*R*)-*N*-(3',4'-dichloro)benzyl 2-*N*-(*tert*-butoxycarbonyl)amino-3-methoxypropionamide (4.58 g, 12.1 mmol). The solution was stirred at room

## Supporting Information

temperature overnight. The reaction was concentrated in vacuo to obtain (*R*)-*N*-(3',4'-dichloro)benzyl 2-amino-3-methoxypropionamide hydrochloride as a light brown foam:  $R_f = 0.13$  (EtOAc);  $^1\text{H NMR}$  (DMSO- $d_6$ )  $\delta$  3.57 (s, OCH<sub>3</sub>), 3.71 ( $\frac{1}{2}$  AB<sub>q</sub>,  $J = 4.1, 10.5$  Hz, CHCHH'), 3.79 ( $\frac{1}{2}$  AB<sub>q</sub>,  $J = 5.3, 10.5$  Hz, CHCHH'), 4.10 (br s, CH), 4.32 ( $\frac{1}{2}$  AB<sub>q</sub>,  $J = 6.0, 15.9$  Hz, NCHH'), 4.40 ( $\frac{1}{2}$  AB<sub>q</sub>,  $J = 5.6, 15.9$  Hz, NCHH'), 7.29 (dd,  $J = 1.8, 8.1$  Hz, 1 ArH), 7.54 (d, 1.8 Hz, 1 ArH), 7.61 (d,  $J = 8.1$  Hz, 1 ArH), 8.36 (br s, NH), 9.25–9.29 (app t, NH); LRMS (ESI<sup>+</sup>) 277.08 [M+H<sup>+</sup>, 100%], 279.08 [M+2+H<sup>+</sup>, 66%], 281.08 [M+4+H<sup>+</sup>, 12%] (calcd for C<sub>11</sub>H<sub>14</sub>Cl<sub>2</sub>N<sub>2</sub>O<sub>2</sub> H<sup>+</sup> 277.05).

**Preparation of (*R*)-*N*-(3',4'-Dichloro)benzyl 2-Acetamido-3-methoxypropionamide ((*R*)-60).** (*R*)-*N*-(3',4'-dichloro)benzyl 2-amino-3-methoxypropionamide hydrochloride (3.50 g, 11.2 mmol) was dissolved in CH<sub>2</sub>Cl<sub>2</sub> (100 mL) and then Et<sub>3</sub>N (4.6 mL, 33.5 mmol) and acetyl chloride (0.95 mL, 13.4 mmol) were carefully added at 0 °C and the resulting solution was stirred at room temperature (2 h). An aqueous 10% citric acid solution (100 mL) was added and the organic layer was extracted with CH<sub>2</sub>Cl<sub>2</sub> (3 x 100 mL). The organic layers were combined, washed with a saturated aqueous NaHCO<sub>3</sub> solution (100 mL), dried (Na<sub>2</sub>SO<sub>4</sub>), and concentrated in vacuo. The residue was recrystallized with EtOAc to obtain (*R*)-*N*-(3',4'-dichloro)benzyl 2-acetamido-3-methoxypropionamide as a white solid (1.60 g, 45%):  $R_f = 0.16$  (EtOAc/hexanes, 7/3); mp = 165 °C;  $[\alpha]^{24.9}_D -10.5^\circ$  ( $c$  1.0, CHCl<sub>3</sub>); IR (nujol) 3292, 3096, 2927, 2859, 1636, 1555, 1459, 1379, 1256, 1135, 1034, 815, 724, 604, 491 cm<sup>-1</sup>;  $^1\text{H NMR}$  (CDCl<sub>3</sub>)  $\delta$  2.05 (C(O)CH<sub>3</sub>), 3.41 (s, OCH<sub>3</sub>), 3.45 (dd,  $J = 7.5, 9.3$  Hz, CHH'), 3.82 (dd,  $J = 4.1, 9.3$  Hz, CHH'), 4.39–4.49 (m, NCH<sub>2</sub>), 4.52–4.59 (m, CH), 6.39–6.41 (br d, C(O)NH), 6.80–6.90 (br t, CH<sub>2</sub>NH), 7.10 (dd,  $J = 2.1, 8.1$  Hz, 1 ArH), 7.36 (d,  $J = 2.1$  Hz, 1 ArH), 7.40 (d,  $J = 8.1$  Hz, 1 ArH), addition of excess (*R*)-(-)-mandelic acid to a CDCl<sub>3</sub> solution of (*R*)-*N*-(3',4'-dichloro)benzyl 2-acetamido-3-methoxypropionamide gave only one signal for the acetyl methyl protons and one signal for the ether methyl protons;  $^{13}\text{C NMR}$  (CDCl<sub>3</sub>)  $\delta$  23.1 (C(O)CH<sub>3</sub>), 42.2 (NCH<sub>2</sub>), 52.6 (OCH<sub>2</sub>CH), 59.1 (OCH<sub>3</sub>), 71.7 (OCH<sub>2</sub>CH), 126.6,

## Supporting Information

129.1, 130.5, 131.3, 132.6, 138.3 (6 ArC), 170.2, 170.4 (2 C(O)); LRMS (ESI<sup>+</sup>) 341.05 [M+Na<sup>+</sup>, 100%], 343.05 [M+2+Na<sup>+</sup>, 64%], 345.05 [M+4+Na<sup>+</sup>, 11%] (calcd for C<sub>13</sub>H<sub>16</sub>Cl<sub>2</sub>N<sub>2</sub>O<sub>3</sub> Na<sup>+</sup> 341.04); Anal. Calcd. for C<sub>13</sub>H<sub>16</sub>Cl<sub>2</sub>N<sub>2</sub>O<sub>3</sub>: C, 48.92; H, 5.05; Cl, 22.21; N, 8.78. Found: C, 49.14; H, 5.01; Cl, 22.12; N, 8.80.

### 33. Preparation of (*R*)-*N*-(2',4'-Dichloro)benzyl 2-Acetamido-3-methoxypropionamide ((*R*)-61).

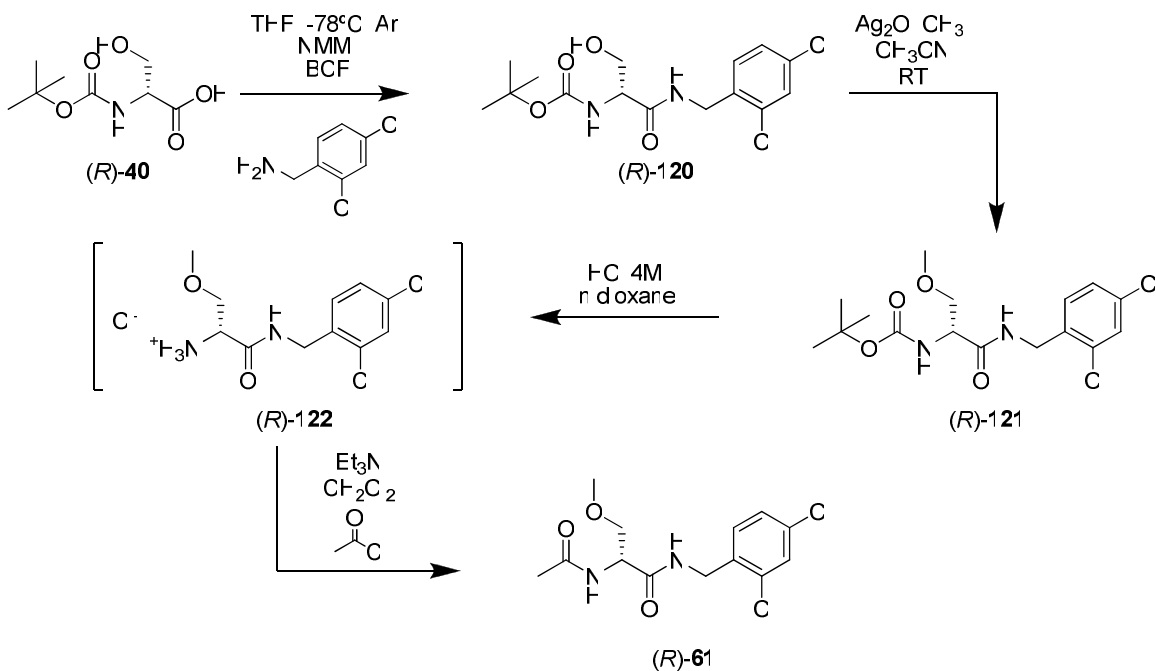

**Preparation of (*R*)-*N*-(2',4'-Dichloro)benzyl 2-*N*-(*tert*-Butoxycarbonyl)amino-3-hydroxypropionamide ((*R*)-120).** A THF solution (180 mL) of (*R*)-Boc-serine (4.30g, 21.0 mmol) was stirred and cooled at -78 °C under Ar, and then 4-methylmorpholine (NMM) (2.8 mL, 25.1 mmol) was added dropwise. After 2 min of stirring at this temperature, isobutylchloroformate (IBCF) (3.3 mL, 25.1 mmol) was added dropwise leading to the precipitation of a white solid, and the reaction was allowed to proceed for additional 2 min. Then, 2,4-dichlorobenzylamine (3.3 mL, 25.1 mmol) and was added portionwise at -78 °C. The mixture was stirred at -78 °C (5 min) and then at room temperature (2 h). The white solid was filtered and the organic layer was concentrated in vacuo. The residue was purified by flash liquid chromatography with EtOAc/hexanes

## Supporting Information

(3/7 to 7/3) as the eluant to obtain (*R*)-*N*-(2',4'-dichloro)benzyl 2-*N*-(*tert*-butoxycarbonyl)amino-3-hydroxypropionamide as a white solid (4.94 g, 65%):  $R_f$  = 0.47 (EtOAc/hexanes, 7/3); mp = 123 °C;  $[\alpha]^{24.8}_D +46.6^\circ$  (*c* 1.0, CHCl<sub>3</sub>); IR (nujol) 2953, 2955, 2724, 1696, 1638, 1520, 1457, 1374, 1289, 1160, 1076, 827, 725, 634, 515 cm<sup>-1</sup>; <sup>1</sup>H NMR (CDCl<sub>3</sub>) δ 1.44 (s, C(CH<sub>3</sub>)<sub>3</sub>), 2.91–3.05 (m, CHH'OH), 3.63–3.71 (m, CHH'OH), 4.11–4.16 (m, CH, OH), 4.45–4.58 (m, CH<sub>2</sub>N), 5.05–5.15 (m, NH), 7.19–7.38 (m, 3 ArH, NH); <sup>13</sup>C NMR (CDCl<sub>3</sub>) δ 28.2 (C(CH<sub>3</sub>)<sub>3</sub>), 40.8 (NCH<sub>2</sub>), 54.7 (OCH<sub>2</sub>CH), 62.6 (OCH<sub>2</sub>CH), 80.8 (C(CH<sub>3</sub>)<sub>3</sub>), 127.3, 129.4, 130.4, 133.8, 134.0, 134.1 (6 ArC), 156.3 (NC(O)O), 171.6 (C(O)); LRMS (ESI<sup>+</sup>) 385.08 [M+Na<sup>+</sup>, 100%], 387.08 [M+2+Na<sup>+</sup>, 66%], 389.08 [M+4+Na<sup>+</sup>, 12%] (calcd for C<sub>15</sub>H<sub>20</sub>Cl<sub>2</sub>N<sub>2</sub>O<sub>4</sub> Na<sup>+</sup> 385.07); Anal. Calcd. for C<sub>15</sub>H<sub>20</sub>Cl<sub>2</sub>N<sub>2</sub>O<sub>4</sub>: C, 49.60; H, 5.55; Cl, 19.52; N, 7.71. Found: C, 49.63; H, 5.62; Cl, 19.65; N, 7.64.

**Preparation of (*R*)-*N*-(2',4'-Dichloro)benzyl 2-*N*-(*tert*-Butoxycarbonyl)amino-3-methoxypropionamide ((*R*)-121).** Ag<sub>2</sub>O (14.80 g, 63.9 mmol, 5 equiv) was added to a CH<sub>3</sub>CN solution (230 mL) of (*R*)-*N*-(2',4'-dichloro)benzyl 2-*N*-(*tert*-butoxycarbonyl)amino-3-hydroxypropionamide (4.64 g, 12.8 mmol, 1 equiv) and CH<sub>3</sub>I (8.0 mL, 127.7 mmol, 10 equiv) at room temperature under Ar. The reaction mixture was stirred at room temperature in the dark (2 d), filtered through a Celite<sup>®</sup> pad, and the filtrate was concentrated in vacuo. The residue was purified by flash liquid chromatography on silica gel with EtOAc/hexanes (3/7 to 5/5) as the eluant to obtain (*R*)-*N*-(2',4'-dichloro)benzyl 2-*N*-(*tert*-butoxycarbonyl)amino-3-methoxypropionamide as a white oil (4.60 g, 95%):  $R_f$  = 0.85 (EtOAc/hexanes, 7/3);  $[\alpha]^{23.6}_D -9.5^\circ$  (*c* 1.0, CHCl<sub>3</sub>); IR (nujol) 3055, 2982, 2929, 2358, 1681, 1483, 1371, 1265, 1165, 1112, 1055, 866, 832, 739 cm<sup>-1</sup>; <sup>1</sup>H NMR (CDCl<sub>3</sub>) δ 1.44 (s, C(CH<sub>3</sub>)<sub>3</sub>), 3.37 (s, OCH<sub>3</sub>), 3.47 (dd, *J* = 6.3, 9.0 Hz, CHH'), 3.83 (dd, *J* = 3.6, 9.0 Hz, CHH'), 4.26 (br s, CH), 4.47–4.53 (m, CH<sub>2</sub>N), 5.38 (br s, NH), 6.91 (br s, NH), 7.21 (br dd, *J* = 2.1, 8.4 Hz, 1 ArH), 7.31 (br d, *J* = 8.4 Hz, 1 ArH), 7.38 (br d, *J* = 2.1 Hz, 1 ArH), <sup>13</sup>C NMR (CDCl<sub>3</sub>) δ 28.2 (C(CH<sub>3</sub>)<sub>3</sub>), 40.8 (NCH<sub>2</sub>), 53.9 (OCH<sub>2</sub>CH), 59.0 (OCH<sub>3</sub>), 71.8 (OCH<sub>2</sub>CH), 80.3 (C(CH<sub>3</sub>)<sub>3</sub>), 127.2, 129.2, 130.3, 133.8, 133.9, 134.0 (6 ArC), 155.4 (NC(O)O),

## Supporting Information

170.4 (**C(O)**); LRMS [M] (ESI<sup>+</sup>) 399.09 [M+Na<sup>+</sup>, 100%], 401.09 [M+2+Na<sup>+</sup>, 65%], 403.08 [M+4+Na<sup>+</sup>, 12%] (calcd for C<sub>16</sub>H<sub>22</sub>Cl<sub>2</sub>N<sub>2</sub>O<sub>4</sub> Na<sup>+</sup> 399.08); Anal. Calcd. for C<sub>16</sub>H<sub>22</sub>Cl<sub>2</sub>N<sub>2</sub>O<sub>4</sub>: C, 50.94; H, 5.88; Cl, 18.79; N, 7.43. Found: C, 51.15, H, 6.02; Cl, 18.92; N, 7.35.

**Preparation of (*R*)-*N*-(2',4'-Dichloro)benzyl 2-Amino-3-methoxypropionamide Hydrochloride ((*R*)-122).** HCl (4 M in dioxane, 24 mL) was added at 0 °C to (*R*)-*N*-(2',4'-dichloro)benzyl 2-*N*-(*tert*-butoxycarbonyl)amino-3-methoxypropionamide (4.58 g, 12.1 mmol), and the solution was stirred at room temperature overnight. The reaction was concentrated in vacuo. The residue was triturated with Et<sub>2</sub>O to obtain (*R*)-*N*-(2',4'-dichloro)benzyl 2-amino-3-methoxypropionamide hydrochloride as a beige solid: 142–144 °C; [α]<sup>25</sup><sub>D</sub> +1.1° (c 0.5, MeOH); *R*<sub>f</sub> = 0.13 (EtOAc); IR (nujol) 3452, 3334, 2873, 2731, 1680, 1591, 1459, 1376, 1281, 1239, 1196, 1141, 1101, 1026, 963, 910, 808, 726, 679, 582, 523 cm<sup>-1</sup>; <sup>1</sup>H NMR (DMSO-*d*<sub>6</sub>) δ 3.32 (s, OCH<sub>3</sub>), 3.71 (½ AB<sub>q</sub>, *J* = 3.9, 10.5 Hz, CHCHH'), 3.75 (½ AB<sub>q</sub>, *J* = 5.4, 10.5 Hz, CHCHH'), 4.04–4.13 (br s, CH), 4.28–4.44 (m, NCH<sub>2</sub>), 7.28 (dd, *J* = 1.8, 8.1 Hz, 1 ArH), 7.53 (d, 1.8 Hz, 1 ArH), 7.61 (d, *J* = 8.1 Hz, 1 ArH), 8.23–8.38 (br s, NH<sub>3</sub><sup>+</sup>), 9.13–9.17 (app t, NH); <sup>13</sup>C NMR (DMSO-*d*<sub>6</sub>) δ 40.6 (NCH<sub>2</sub>), 51.7 (OCH<sub>2</sub>CH), 58.0 (OCH<sub>3</sub>), 69.8 (OCH<sub>2</sub>CH), 127.0, 128.4, 128.9, 129.9, 130.4, 139.5 (C<sub>6</sub>H<sub>4</sub>), 166.2 (**C(O)**); LRMS (+ESI) 277.08 [M+H]<sup>+</sup> (100%), 279.08 [M+2+H]<sup>+</sup> (66%), 281.08 [M+4+H]<sup>+</sup> (12%) (calcd for C<sub>11</sub>H<sub>14</sub>Cl<sub>2</sub>N<sub>2</sub>O<sub>2</sub> H<sup>+</sup> 277.05 [M+H]<sup>+</sup>). Anal. Calcd for C<sub>11</sub>H<sub>15</sub>Cl<sub>2</sub>N<sub>2</sub>O<sub>2</sub>•0.08H<sub>2</sub>O: C, 41.95; H, 4.85; Cl, 33.77; N, 8.89. Found: C, 41.72; H, 4.76; Cl, 33.39; N, 8.74.

**Preparation of (*R*)-*N*-(2',4'-Dichloro)benzyl 2-Acetamido-3-methoxypropionamide ((*R*)-61).** (*R*)-*N*-(2',4'-dichloro)benzyl 2-amino-3-methoxypropionamide hydrochloride (2.70 g, 7.16 mmol) was dissolved in CH<sub>2</sub>Cl<sub>2</sub> (60 mL) and then Et<sub>3</sub>N (3.0 mL, 21.48 mmol) and acetyl chloride (0.6 mL, 8.59 mmol) were carefully added at 0 °C and the resulting solution was stirred at room temperature (2 h). An aqueous 10% citric acid solution (60 mL) was added and the organic layer was extracted with CH<sub>2</sub>Cl<sub>2</sub> (3 x 60 mL). The organic layers

## Supporting Information

were combined, washed with a saturated NaHCO<sub>3</sub> solution (60 mL), dried (Na<sub>2</sub>SO<sub>4</sub>), and concentrated in vacuo. The residue was recrystallized with EtOAc to obtain (*R*)-*N*-(2',4'-dichloro)benzyl 2-acetamido-3-methoxypropionamide as a white solid (1.45 g, 63%): *R*<sub>f</sub> = 0.26 (EtOAc); mp = 149 °C; [α]<sup>23.7</sup><sub>D</sub> -11.0° (*c* 1.0, CHCl<sub>3</sub>); IR (nujol) 3477, 3399, 3276, 2919, 2854, 2725, 2363, 1637, 1552, 1458, 1376, 1304, 1251, 1135, 1102, 1050, 974, 821, 724, 606, 505 cm<sup>-1</sup>; <sup>1</sup>H NMR (CDCl<sub>3</sub>) δ 2.04 (C(O)CH<sub>3</sub>), 3.37–3.43 (m, OCH<sub>3</sub>, CHH'), 3.80 (dd, *J* = 4.1, 9.2 Hz, CHH'), 4.43–4.57 (m, NCH<sub>2</sub>, CH), 6.36–6.40 (br d, C(O)NH), 6.90–7.02 (br t, CH<sub>2</sub>NH), 7.22 (dd, *J* = 2.1, 8.3 Hz, 1 ArH), 7.30 (d, *J* = 8.3 Hz, 1 ArH), 7.39 (d, *J* = 2.1 Hz, 1 ArH), addition of excess (*R*)-(-)-mandelic acid to a CDCl<sub>3</sub> solution of (*R*)-*N*-(2',4'-dichloro)benzyl 2-acetamido-3-methoxypropionamide gave only one signal for the acetyl methyl protons and one signal for the ether methyl protons; <sup>13</sup>C NMR (CDCl<sub>3</sub>) δ 23.1 (C(O)CH<sub>3</sub>), 40.9 (NCH<sub>2</sub>), 52.4 (OCH<sub>2</sub>CH), 59.0 (OCH<sub>3</sub>), 71.7 (OCH<sub>2</sub>CH), 127.2, 129.2, 130.3, 133.8, 133.9 (5 ArC), 170.2, 170.4 (2 C(O)), one signal was not detected and is believed to overlap with nearby peaks; LRMS (ESI<sup>+</sup>) 341.08 [M+Na<sup>+</sup>, 100%], 343.08 [M+2+Na<sup>+</sup>, 66%], 345.07 [M+4+Na<sup>+</sup>, 13%] (calcd for C<sub>13</sub>H<sub>16</sub>Cl<sub>2</sub>N<sub>2</sub>O<sub>3</sub> Na<sup>+</sup> 341.04); Anal. Calcd. for C<sub>13</sub>H<sub>16</sub>Cl<sub>2</sub>N<sub>2</sub>O<sub>3</sub>: C, 48.92; H, 5.05; Cl, 22.21; N, 8.78. Found: C, 48.99; H, 4.98; Cl, 22.36; N, 8.69.

---

<sup>1</sup> Fortin, S.; Moreau, E.; Patenaude, A.; Desjardins, M.; Lacroix, J.; Rousseau, J. L.-C.; Gaudreault R. C. *Bioorg. Med. Chem.* **2007**, *15*, 1430–1438.

<sup>2</sup> Braun, J.; Zobel, F. *Ber. Chem.* **1923**, *56B*, 690–696.

<sup>3</sup> Baraldi, P. G.; Cacciari, B.; Romagnoli, R.; Spalluto, G.; Monopoli, A.; Ongini, E.; Varani, K.; Borea, P. A. *J. Med. Chem.* **2002**, *45* (1), 115–126.

<sup>4</sup> Morieux, P.; Stables, J. P.; Kohn, H. *Bioorg. Med. Chem.* **2008**, *16*, 8968–8975.

<sup>5</sup> Kunishima, M.; Kawachi, C.; Iwasaki, F.; Terao, K.; Tani, S. *Tetrahedron* **1999**, *55*, 13159–13170.

<sup>6</sup> Herre, S.; Steinle, W.; Rück-Braun, K. *Synthesis* **2005**, *19*, 3297–3300.

<sup>7</sup> Letiran, A.; Stables, J. P.; Kohn, H. *J. Med. Chem.*, **2002**, *45*, 4762–4773.

<sup>8</sup> Cardillo, G.; Gentilucci, L.; Gianotti, M.; Tolomelli, A. *Tetrahedron* **2001**, *57*, 2807–2812.

<sup>9</sup> Andurkar, S. V.; Stables, J. P.; Kohn, H. *Tetrahedron: Asymmetry* **1998**, *9*, 3841–3854.

## ***Supporting Information***

# Supporting Information

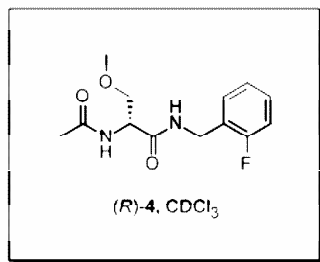

W - Water  
S = Solvent  
I = Impurity

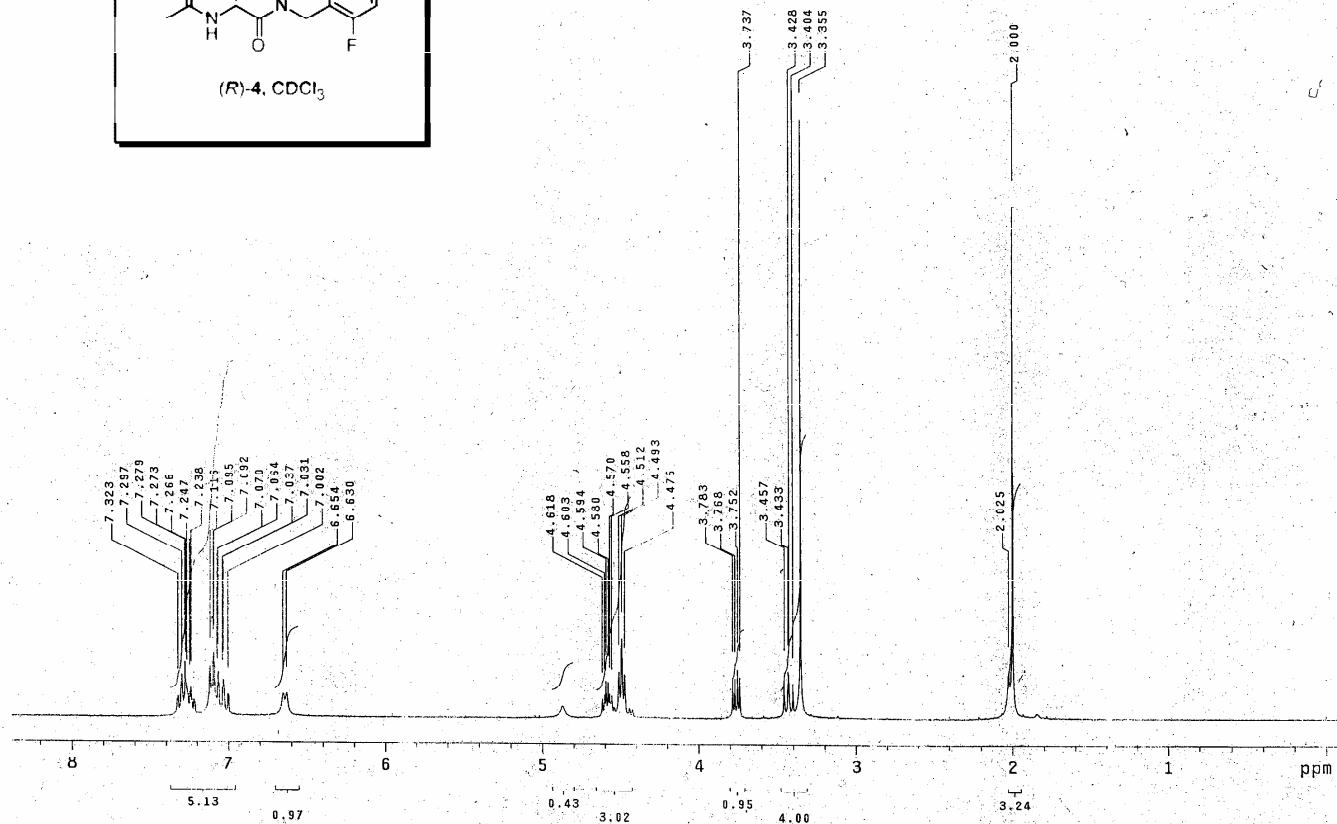



# Supporting Information

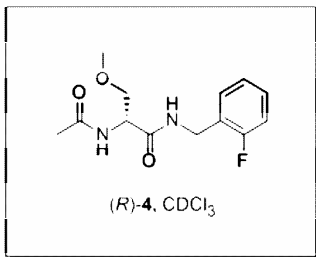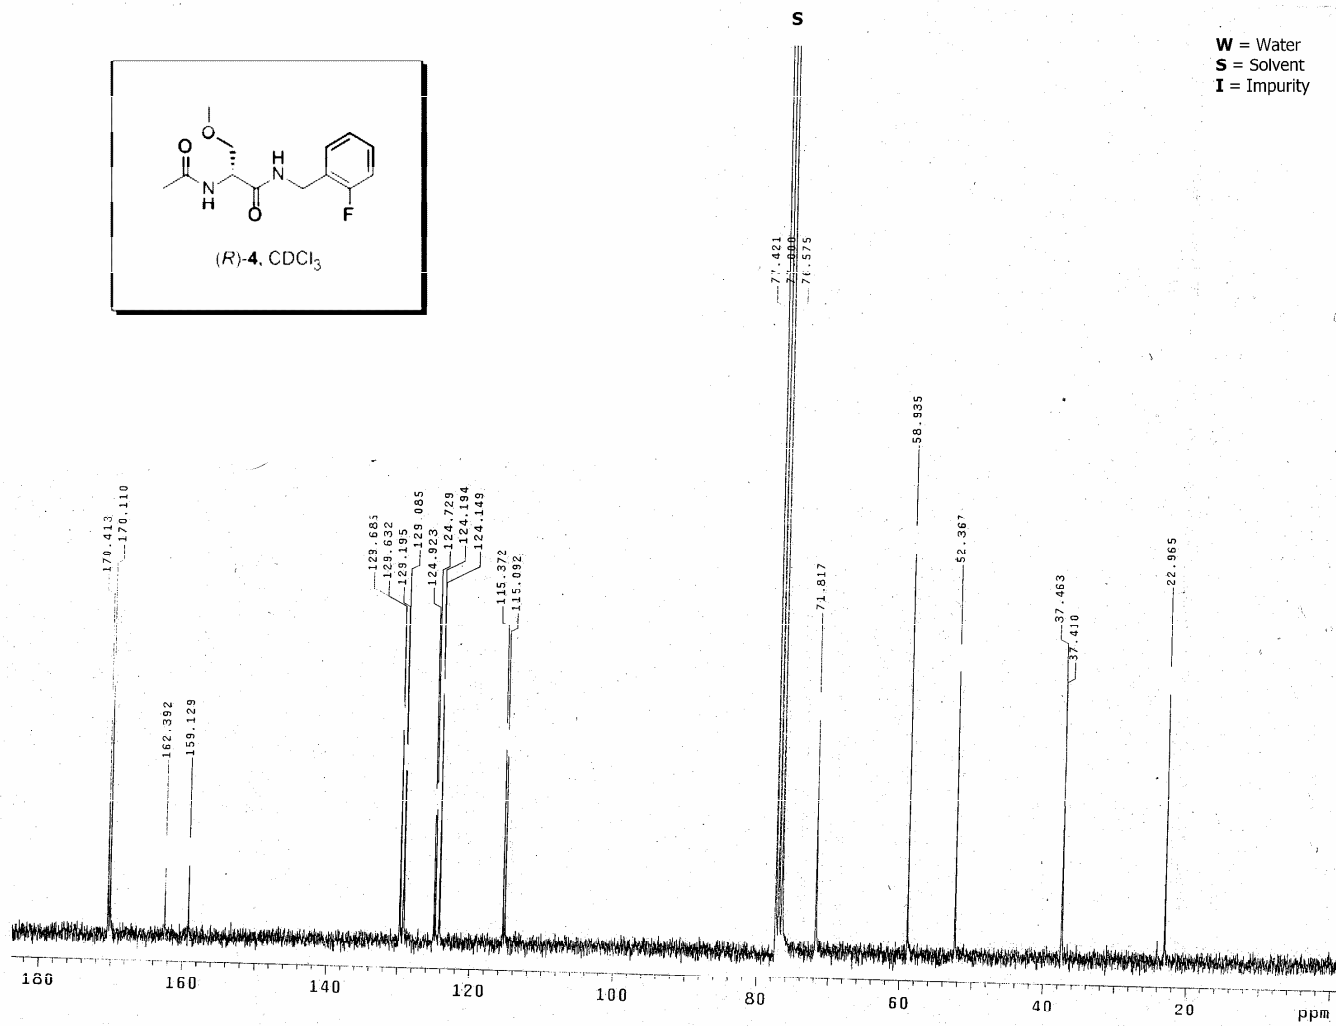

# Supporting Information

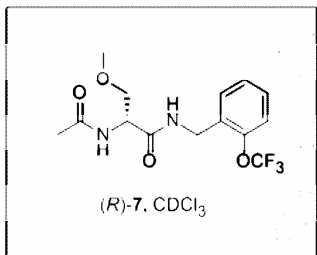

W = Water  
S = Solvent  
I = Impurity

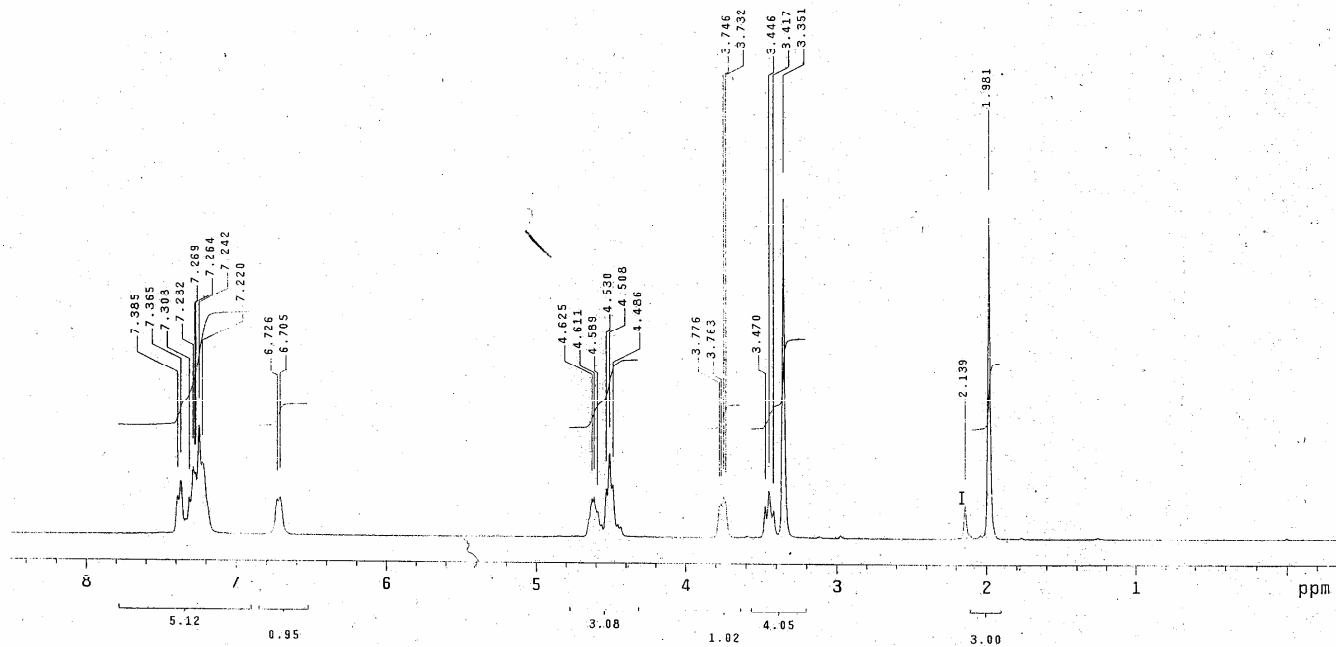

# Supporting Information

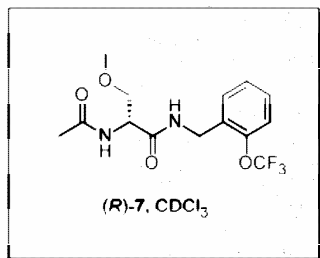

W = Water  
S = Solvent  
I = Impurity

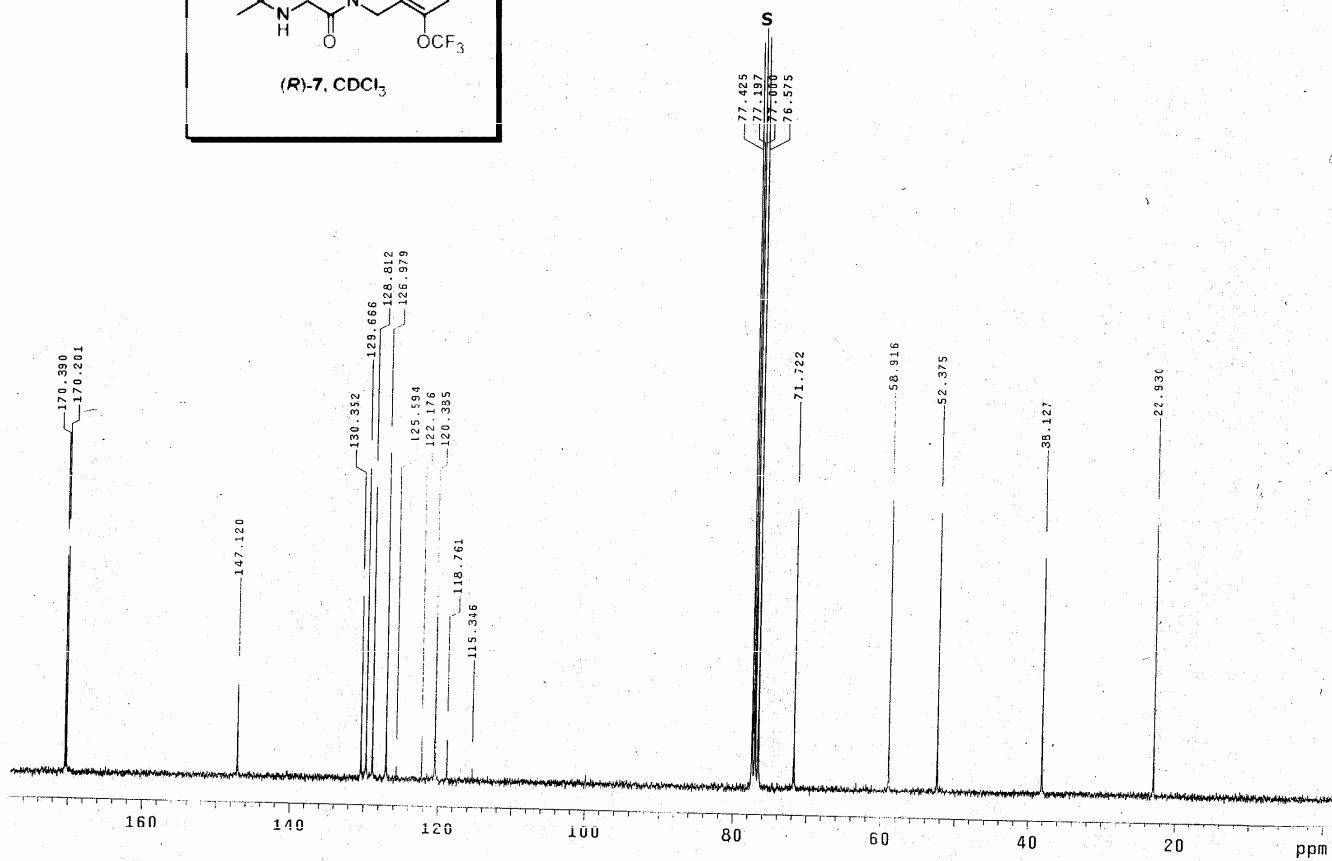

# Supporting Information

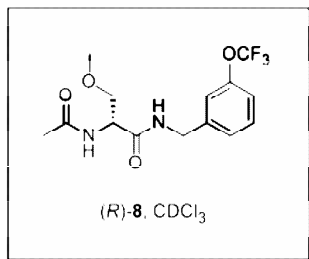

W = Water  
S = Solvent  
I = Impurity

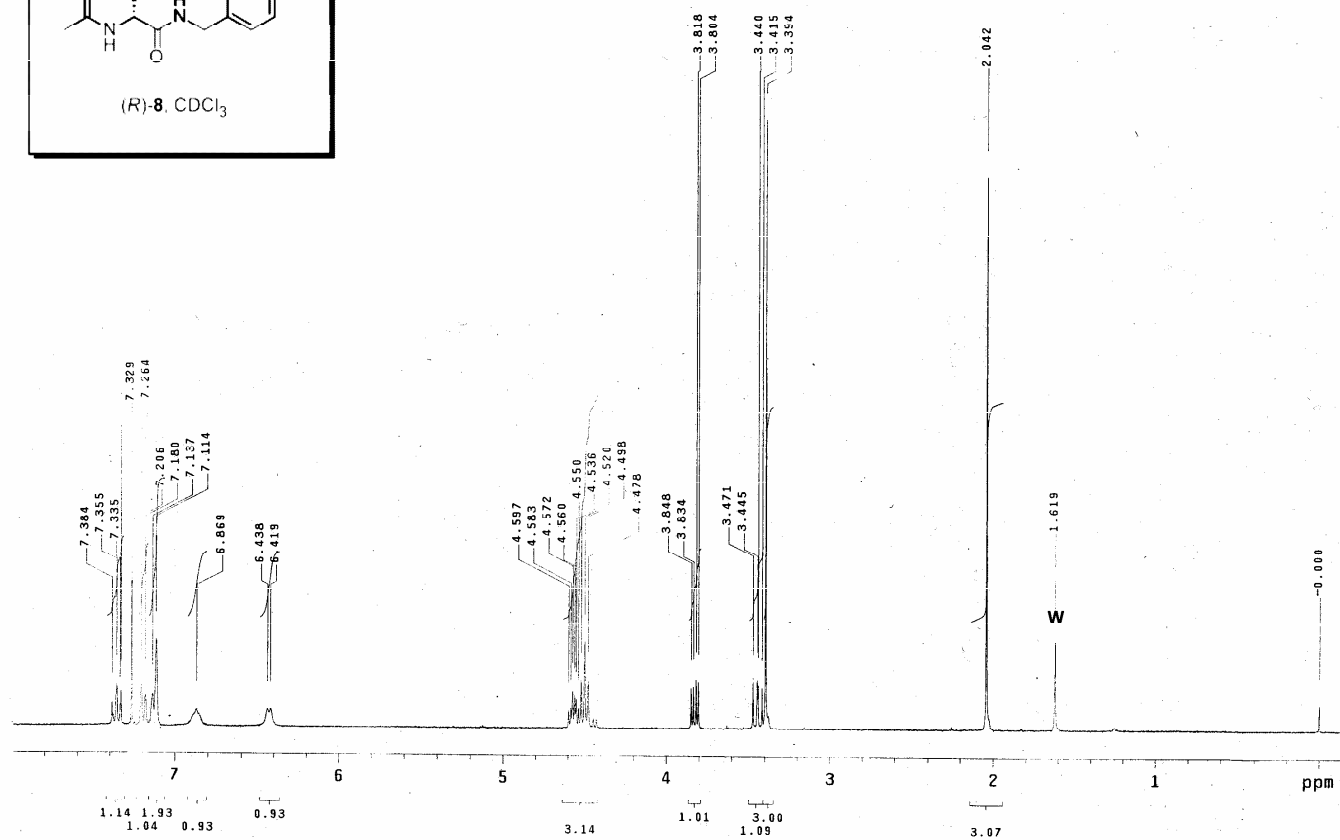

# Supporting Information

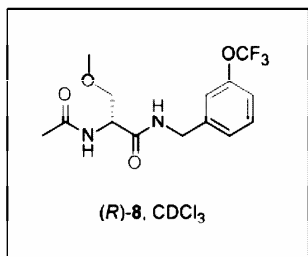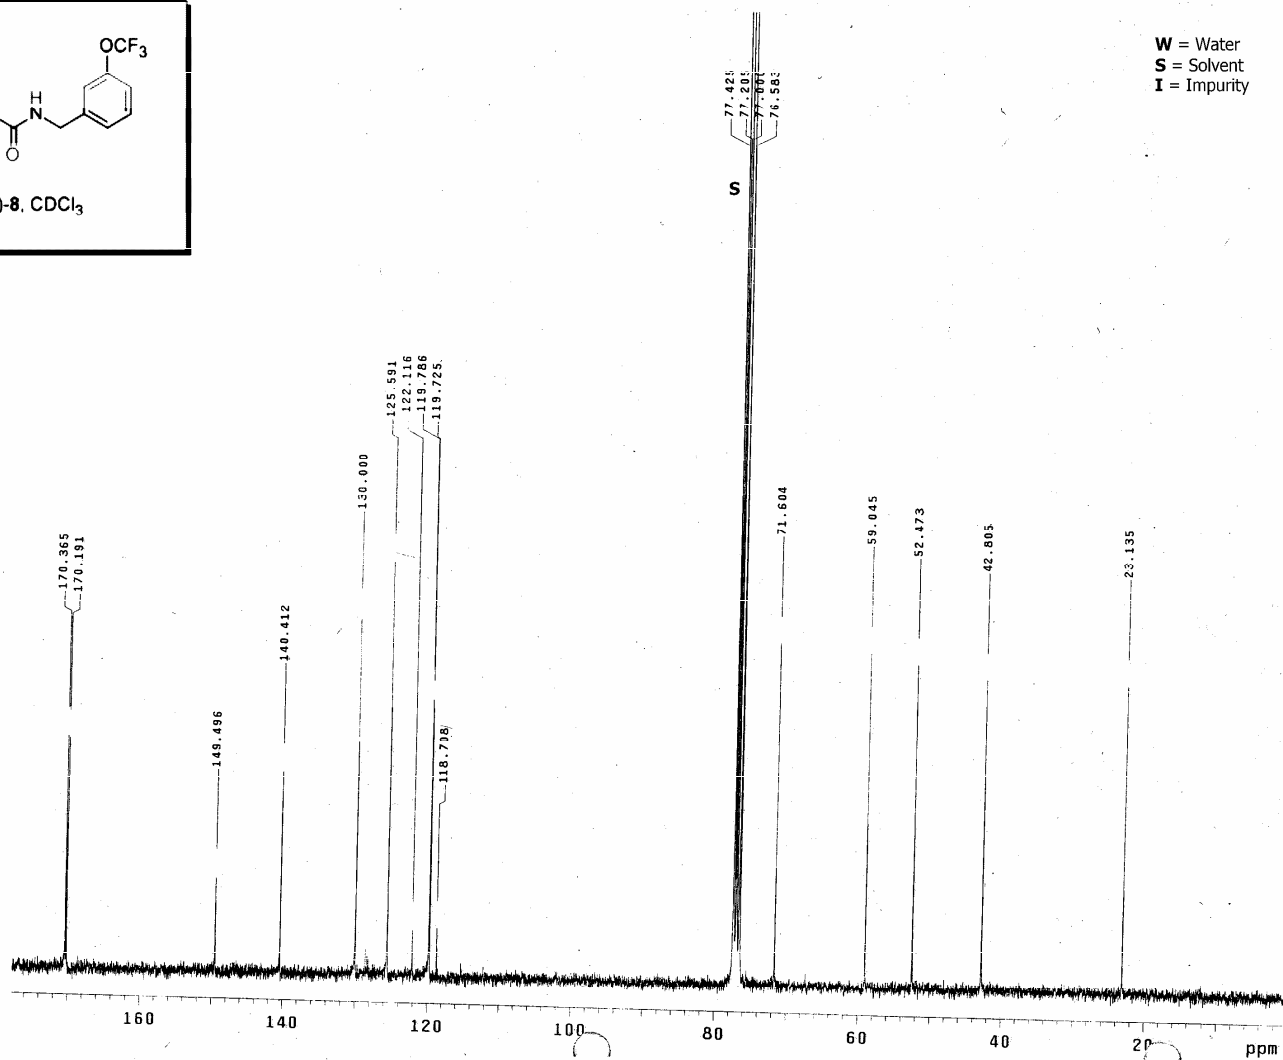

# Supporting Information

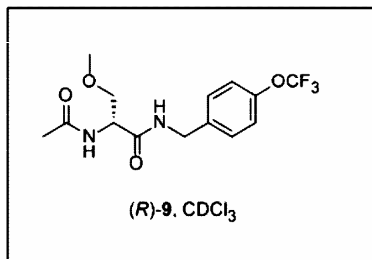

W = Water  
S = Solvent  
I = Impurity

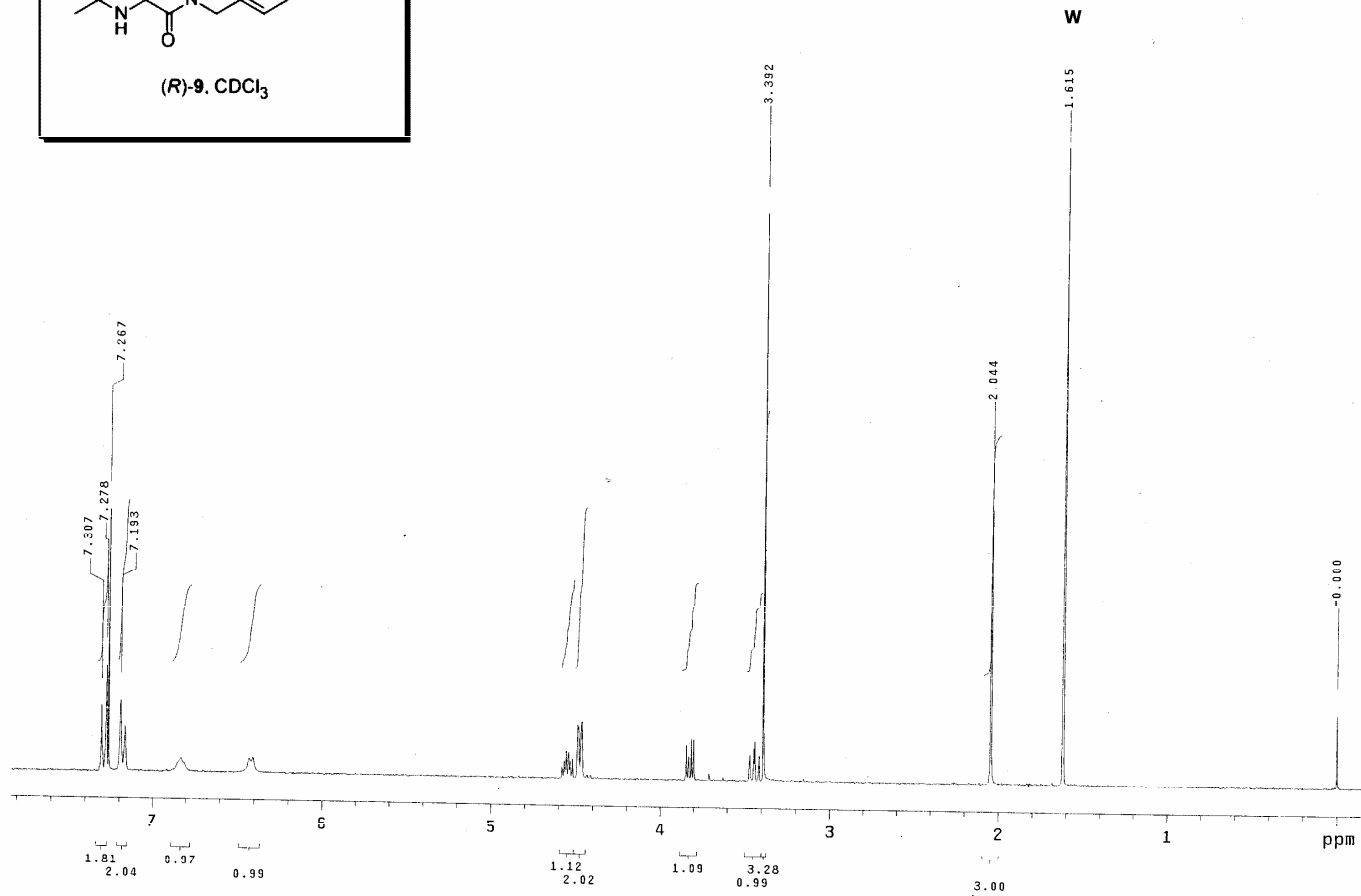

# Supporting Information

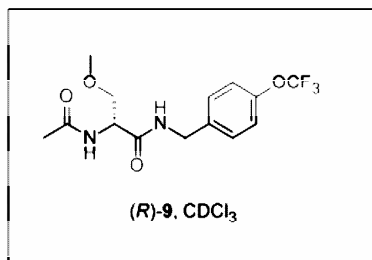

W = Water  
S = Solvent  
i = Impurity

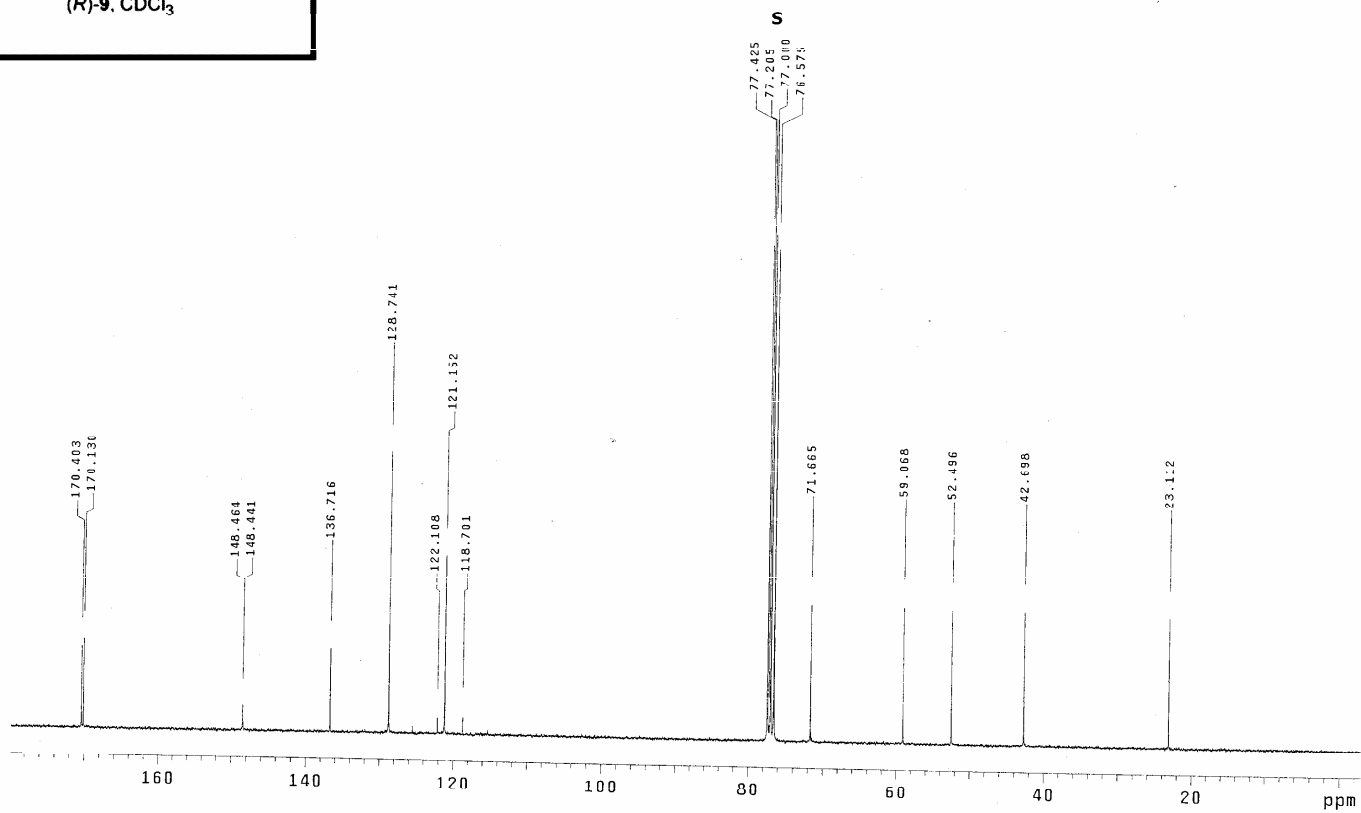

# Supporting Information

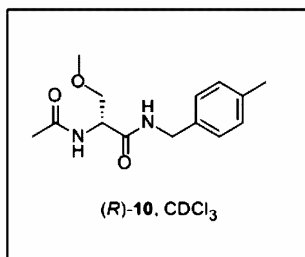

W = Water  
S = Solvent  
I = Impurity

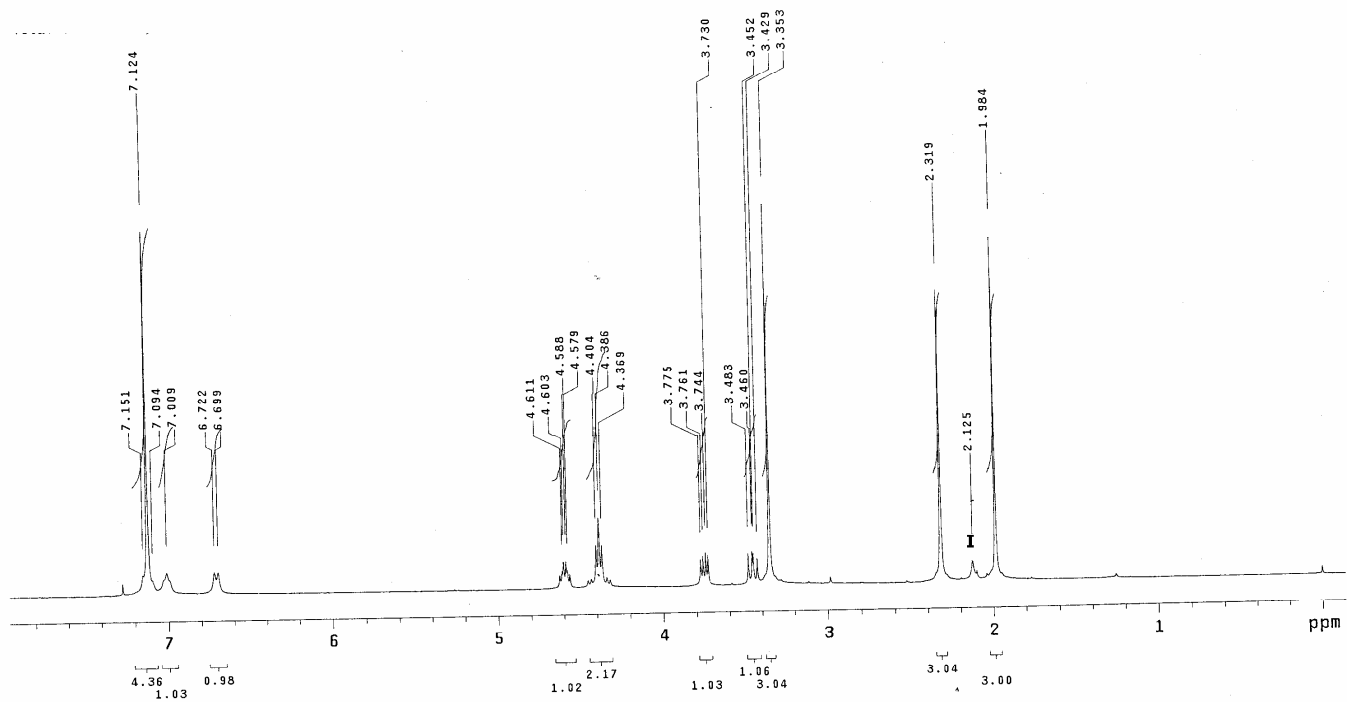



# Supporting Information

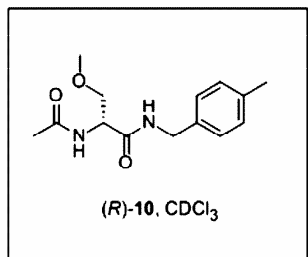

W = Water  
S = Solvent  
I = Impurity

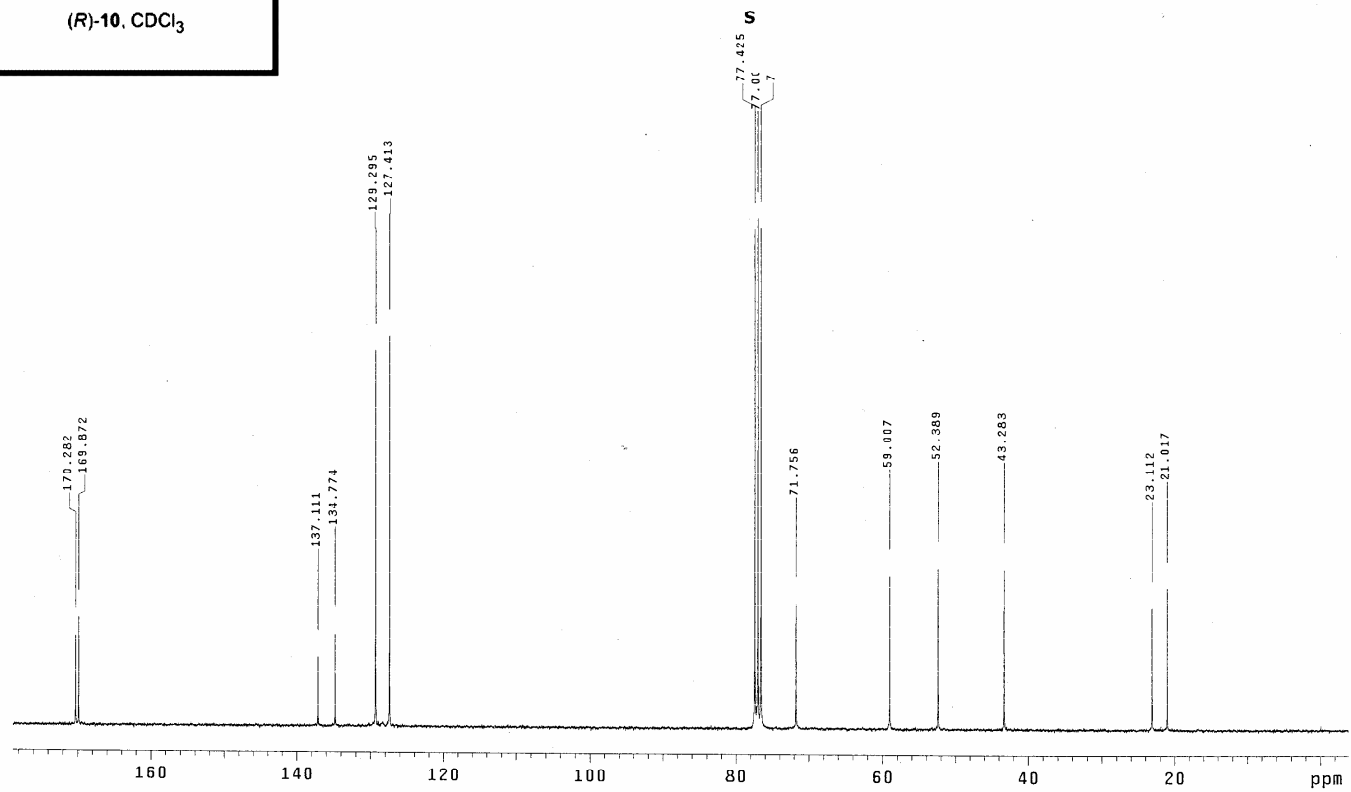

# Supporting Information

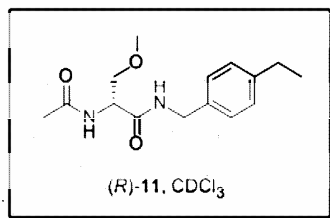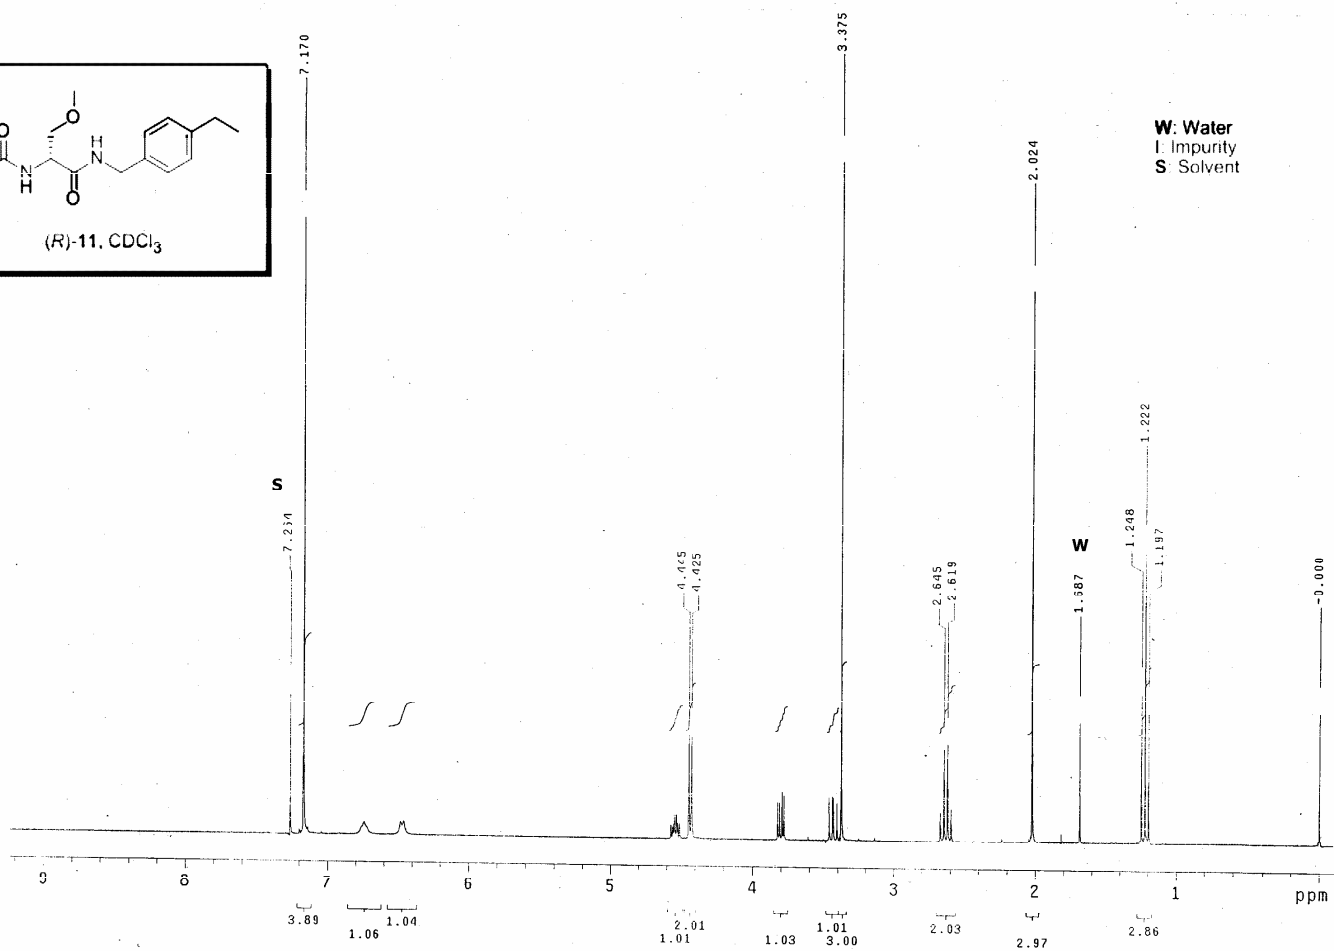

# Supporting Information

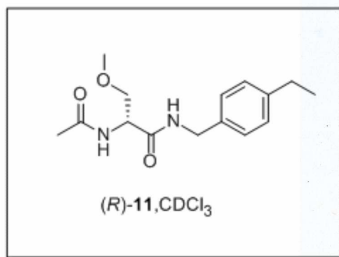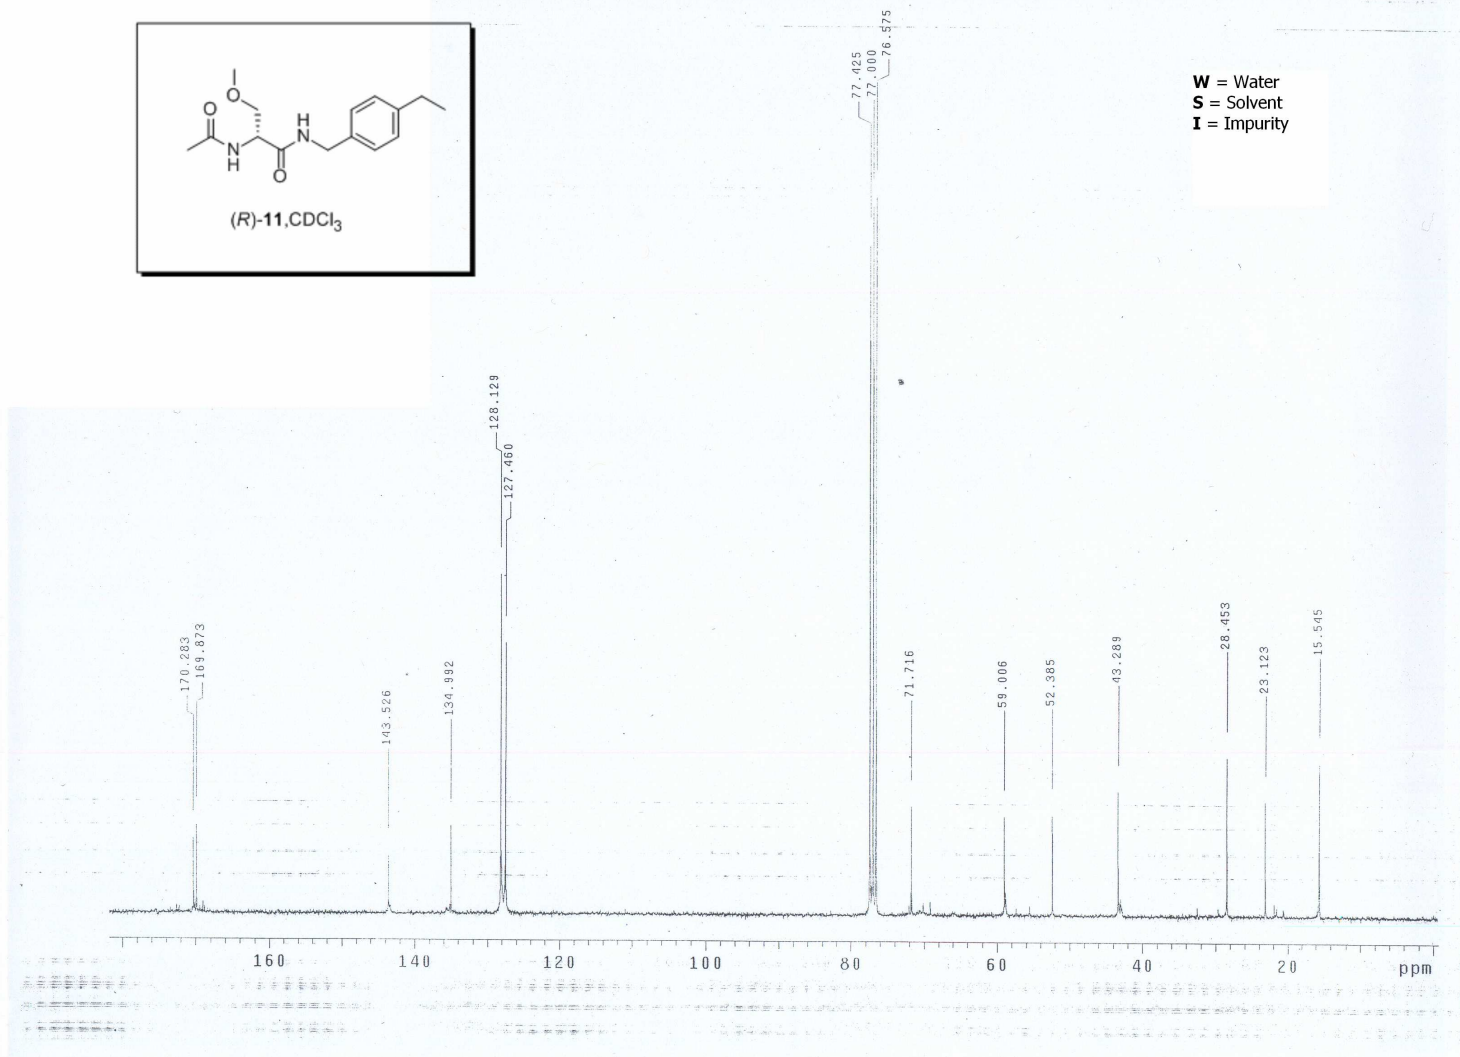

# Supporting Information

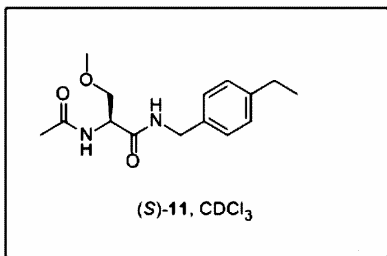

W = Water  
S = Solvent  
I = Impurity

Solvent: CDCl<sub>3</sub>  
Ambient temperature  
GEMINI-300 "m56965"  
PULSE SEQUENCE  
Relax. delay 1.000 sec  
Pulse 23.7 degrees  
Acq. time 1.998 sec  
Width 4500.5 Hz  
16 repetitions  
OBSERVE H1, 300.0608935 MHz  
DATA PROCESSING  
F2 size 32768  
Total time 0 min, 49 sec

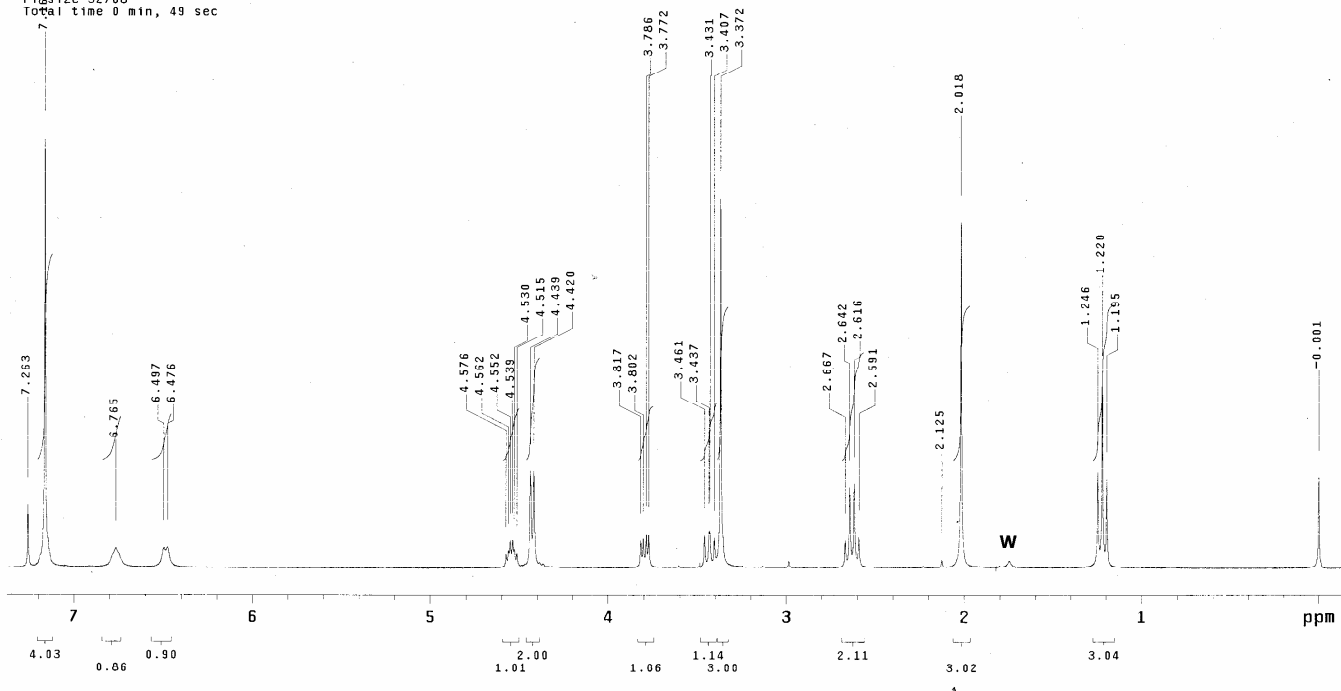

# Supporting Information

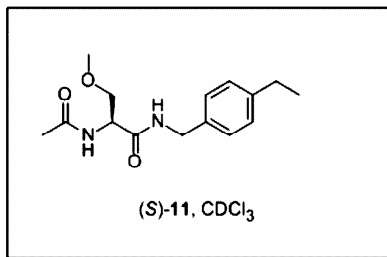

W = Water  
S = Solvent  
I = Impurity

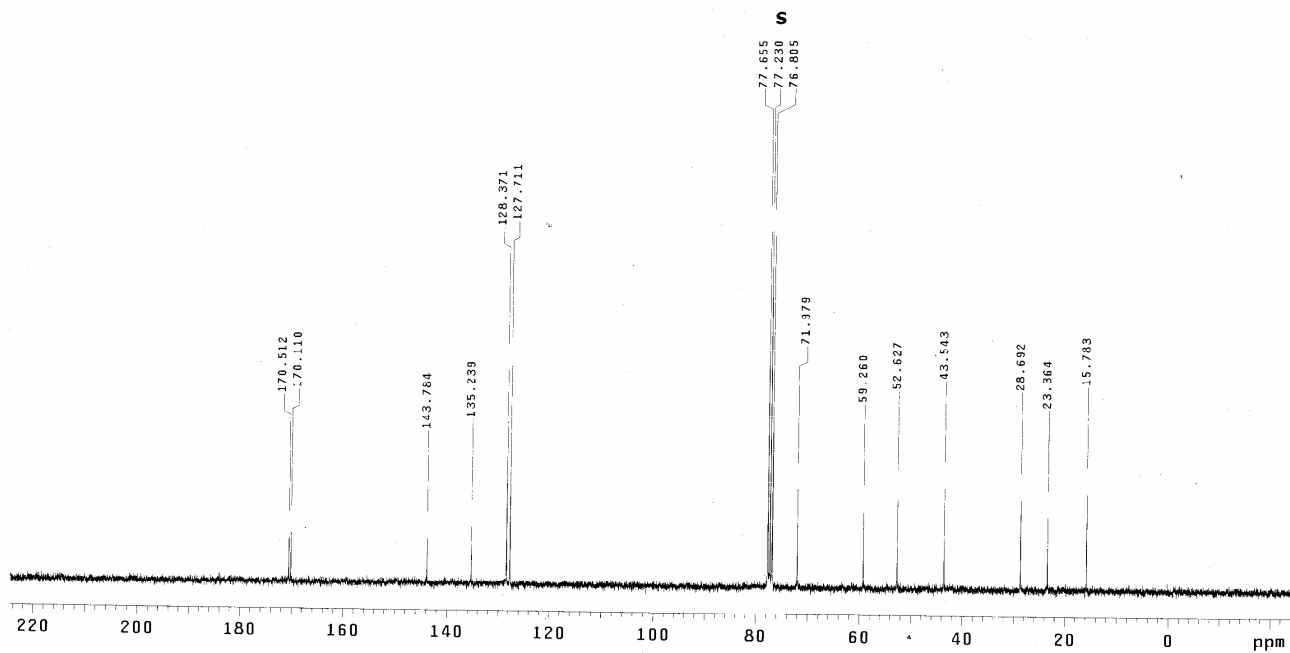

# Supporting Information

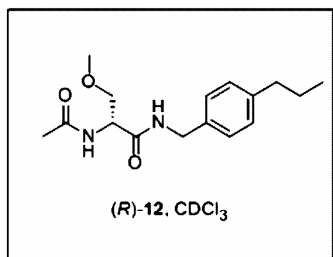

W = Water  
S = Solvent  
I = Impurity

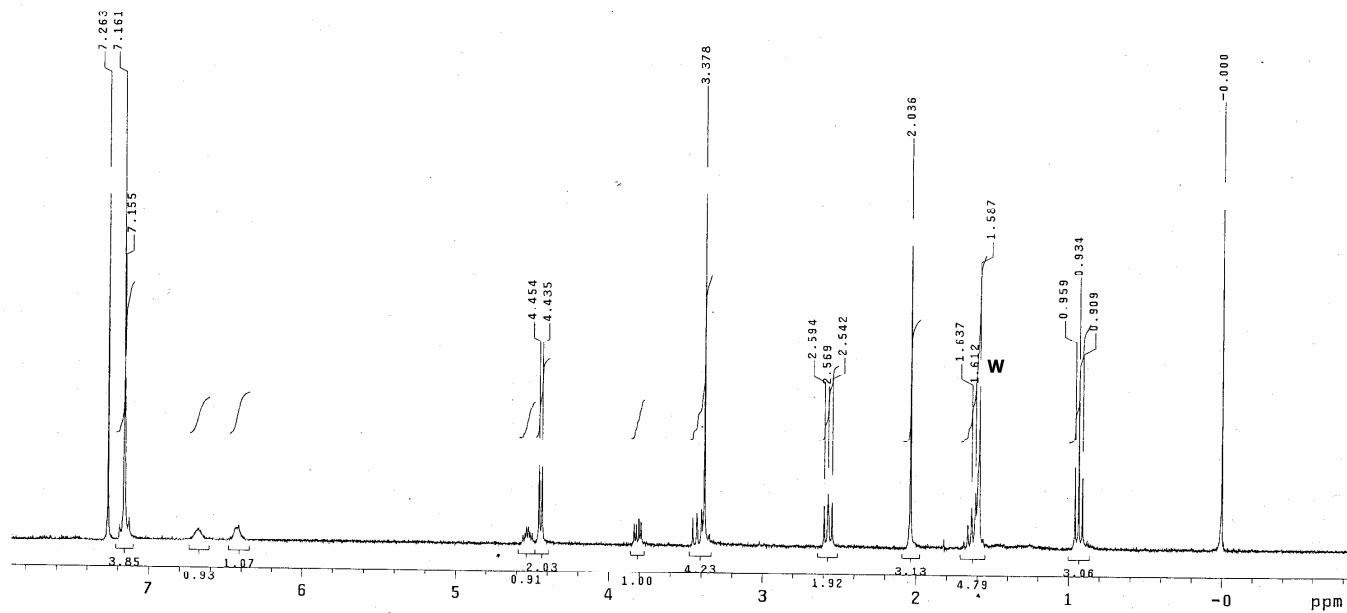

# Supporting Information

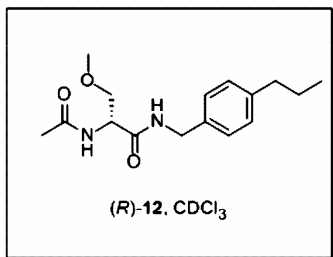

W = Water  
S = Solvent  
I = Impurity

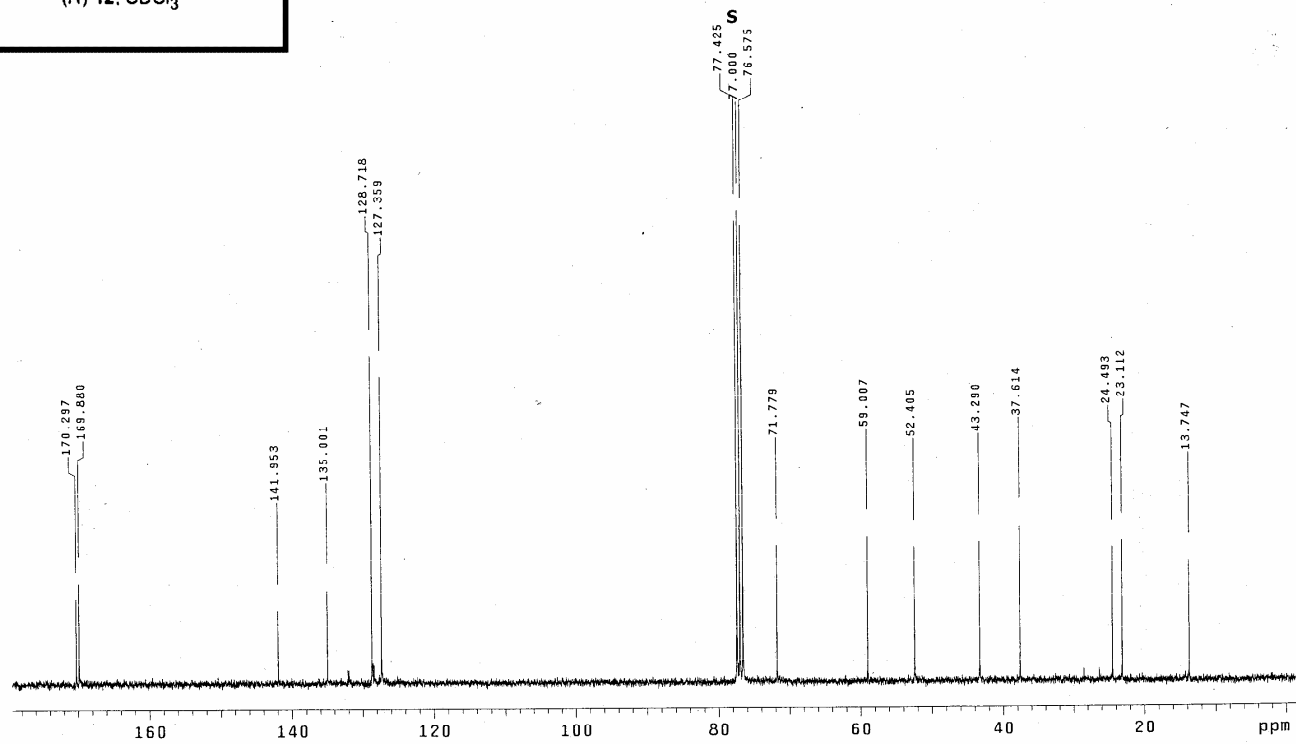

# Supporting Information

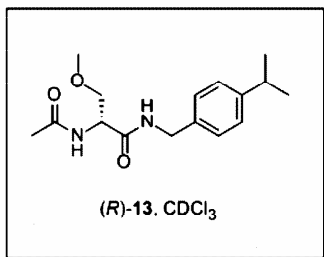

Solvent: CDCl<sub>3</sub>  
 Ambient temperature  
 GEMINI-300 "36965"  
 PULSE SEQUENCE  
 Relax. delay 7.000 sec  
 Pulse 33.3 degrees  
 Acq. time 1.998 sec  
 Width 4500.5 Hz  
 16 repetitions  
 OBSERVE H1, 300.0608946 MHz  
 DATA PROCESSING  
 Line broadening 0.5 Hz  
 FT size 32768  
 Total time 0 min, 59 sec

W = Water  
 S = Solvent  
 I = Impurity

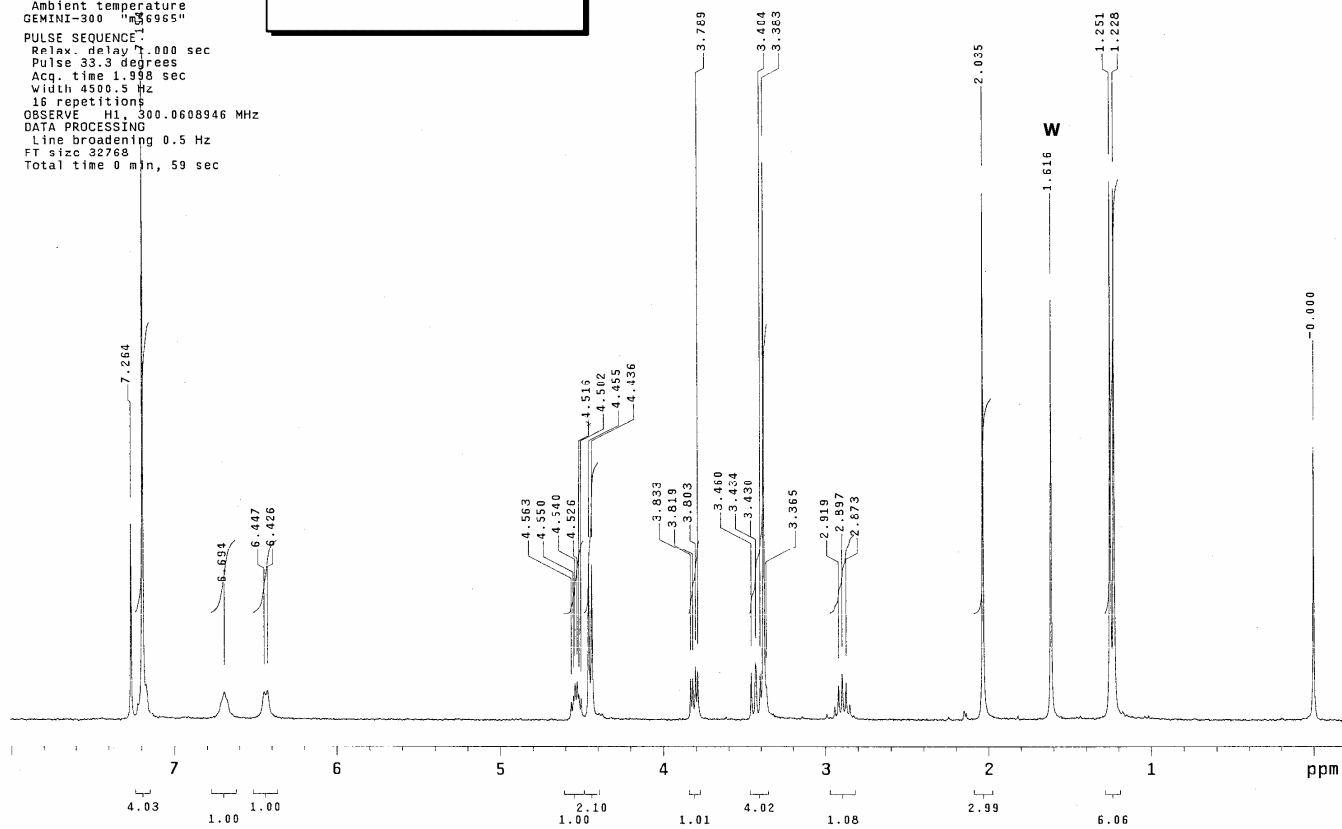



# Supporting Information

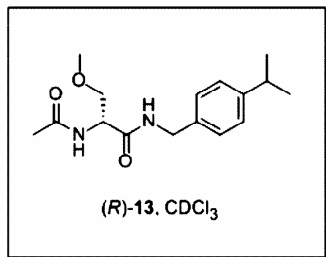

W = Water  
S = Solvent  
I = Impurity

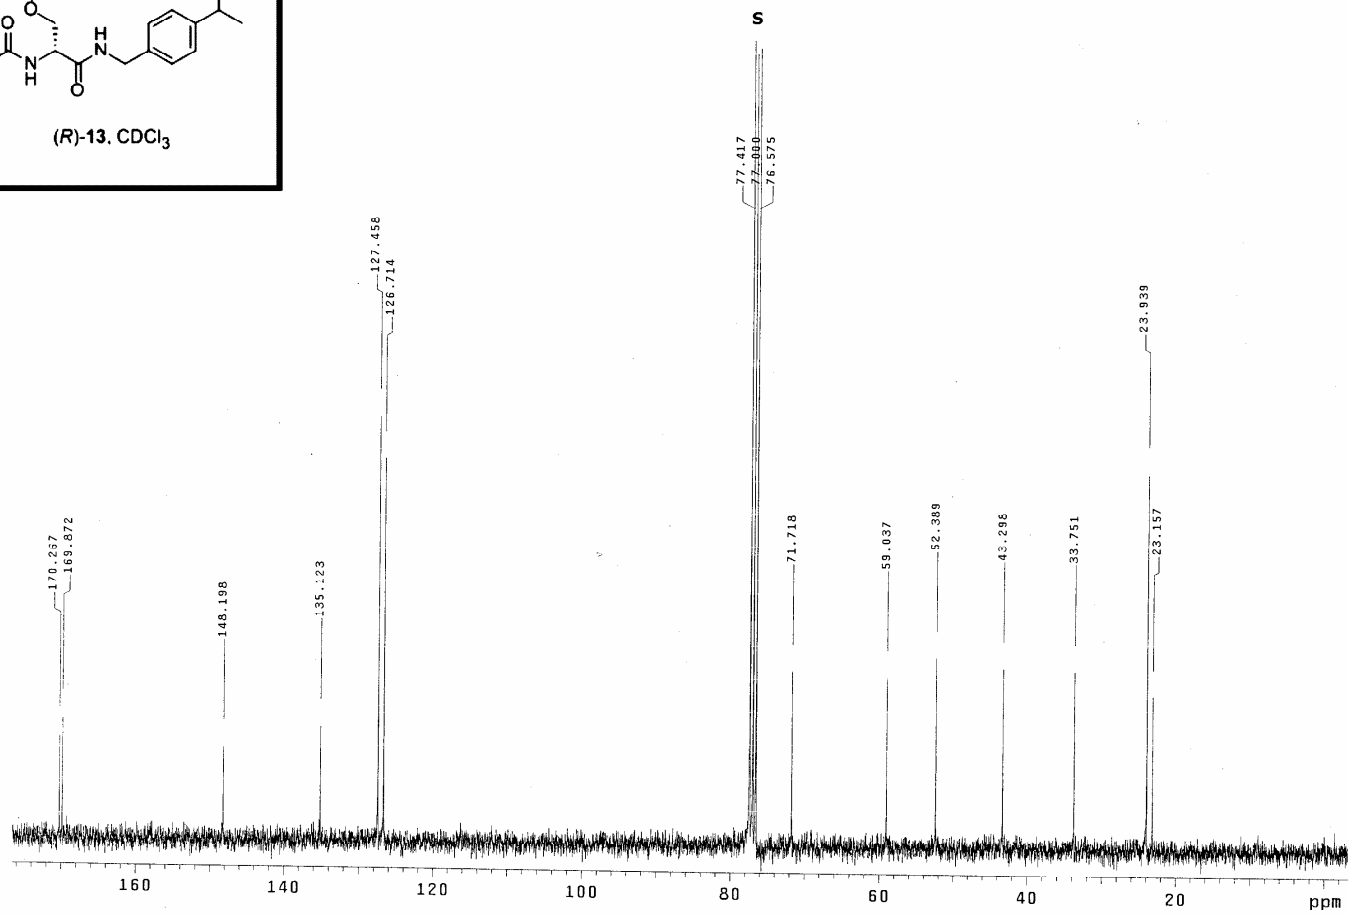

# Supporting Information

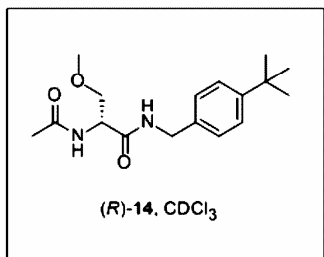

W = Water  
S = Solvent  
I = Impurity

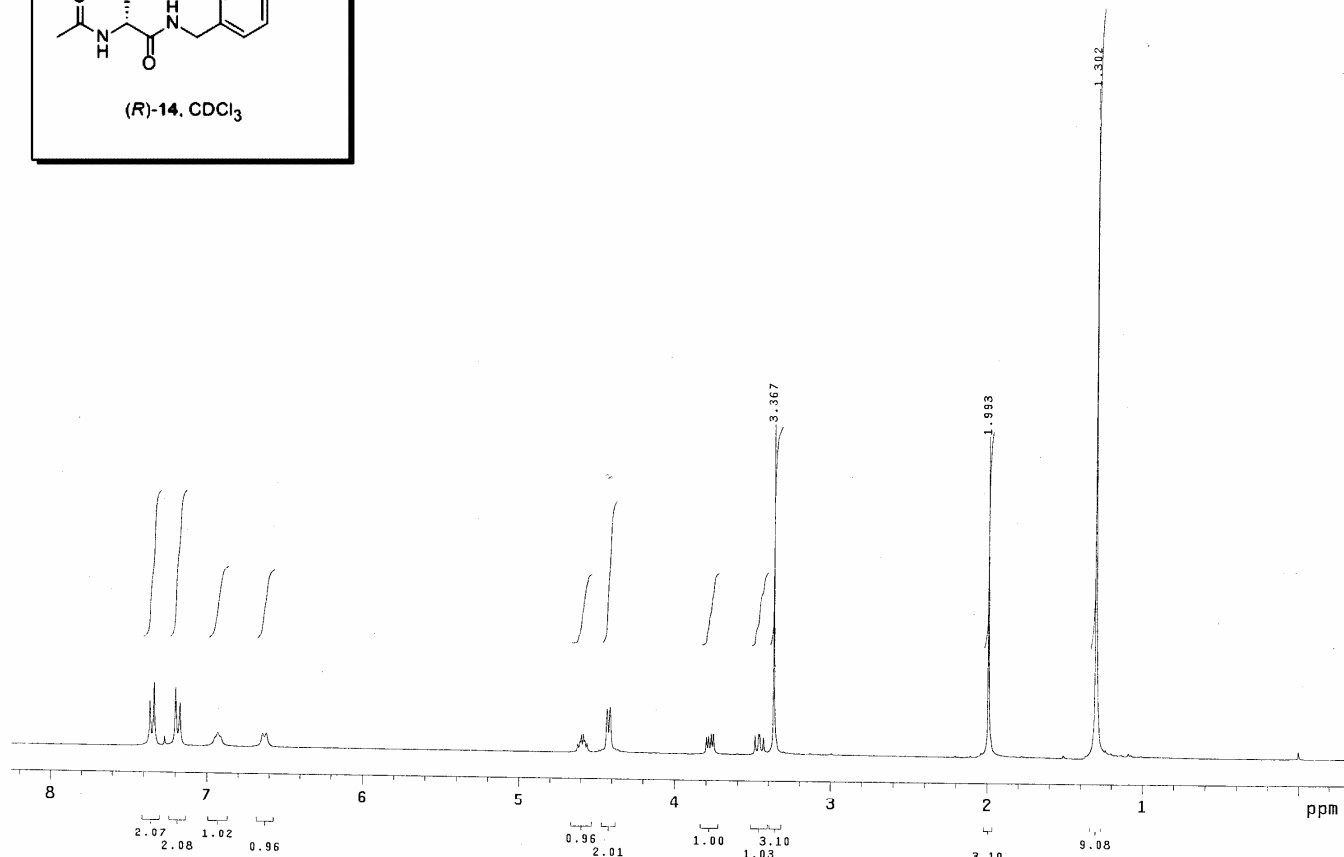

# Supporting Information

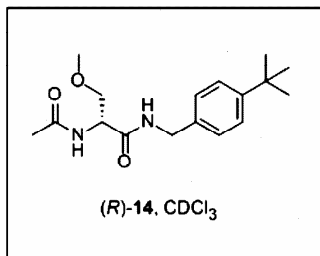

W = Water  
S = Solvent  
I = Impurity

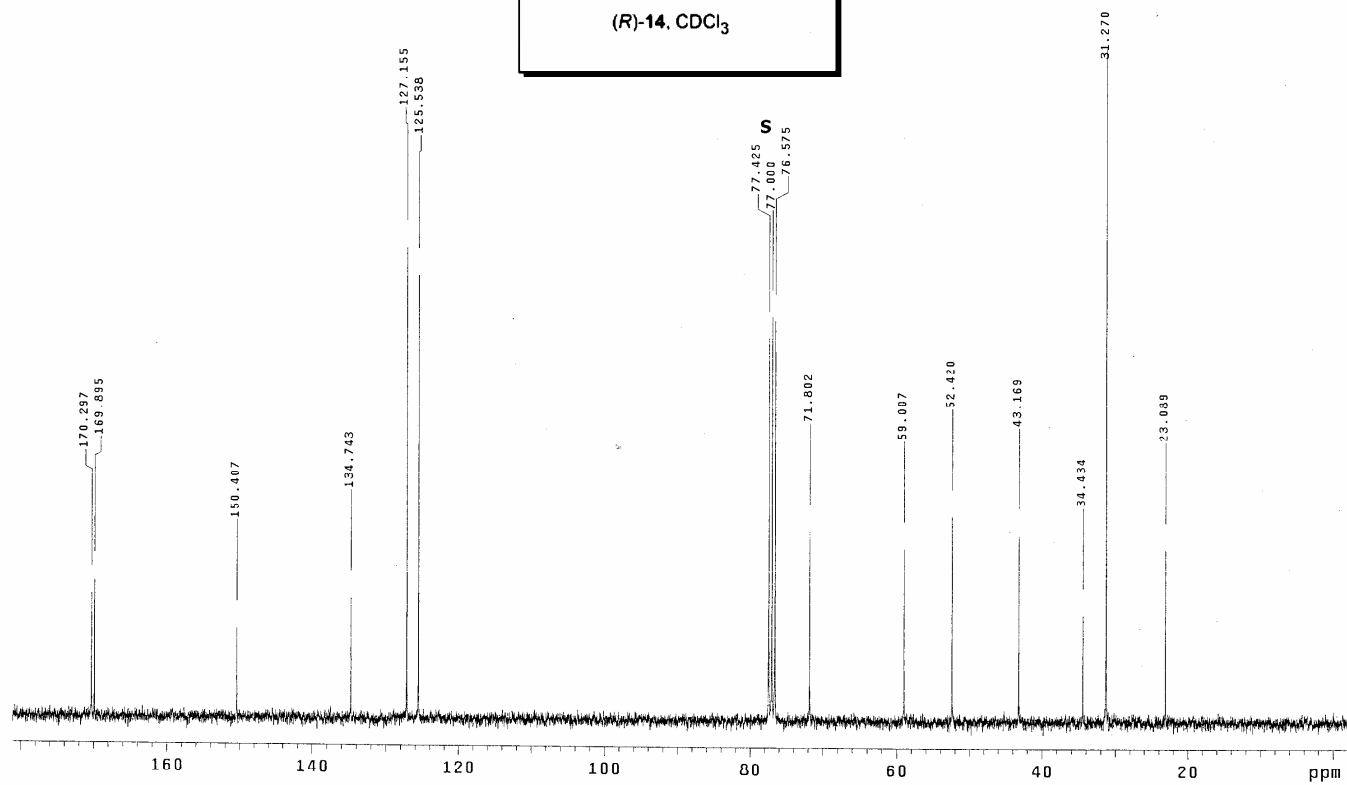

# Supporting Information

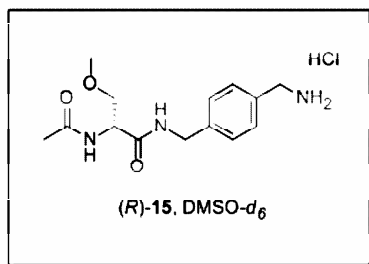

**W** = Water  
**S** = Solvent  
**I** = Impurity

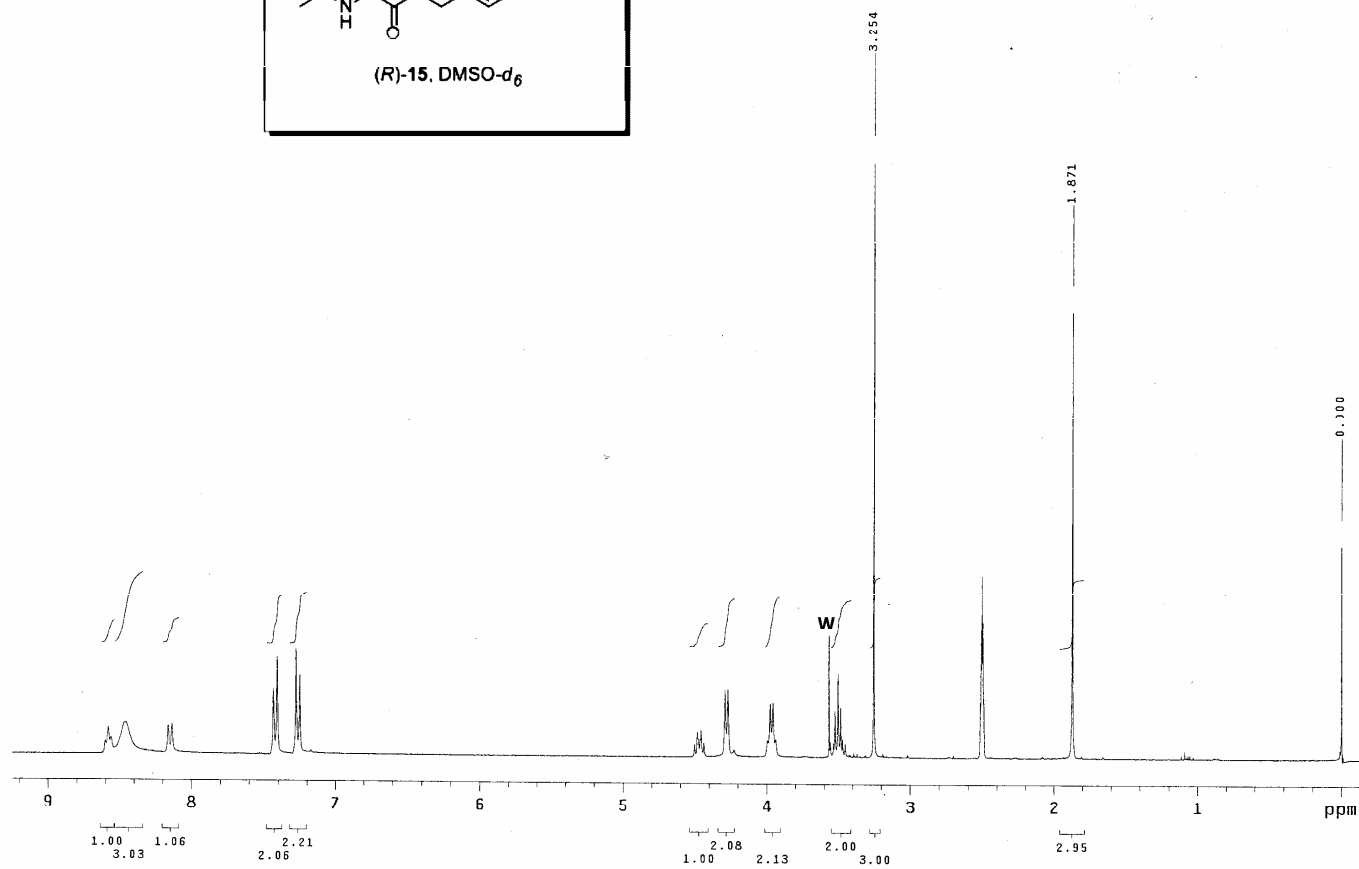

# Supporting Information

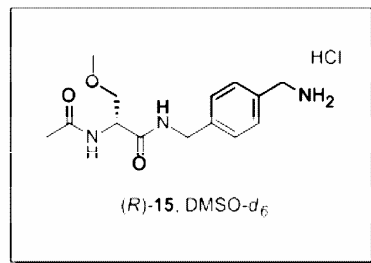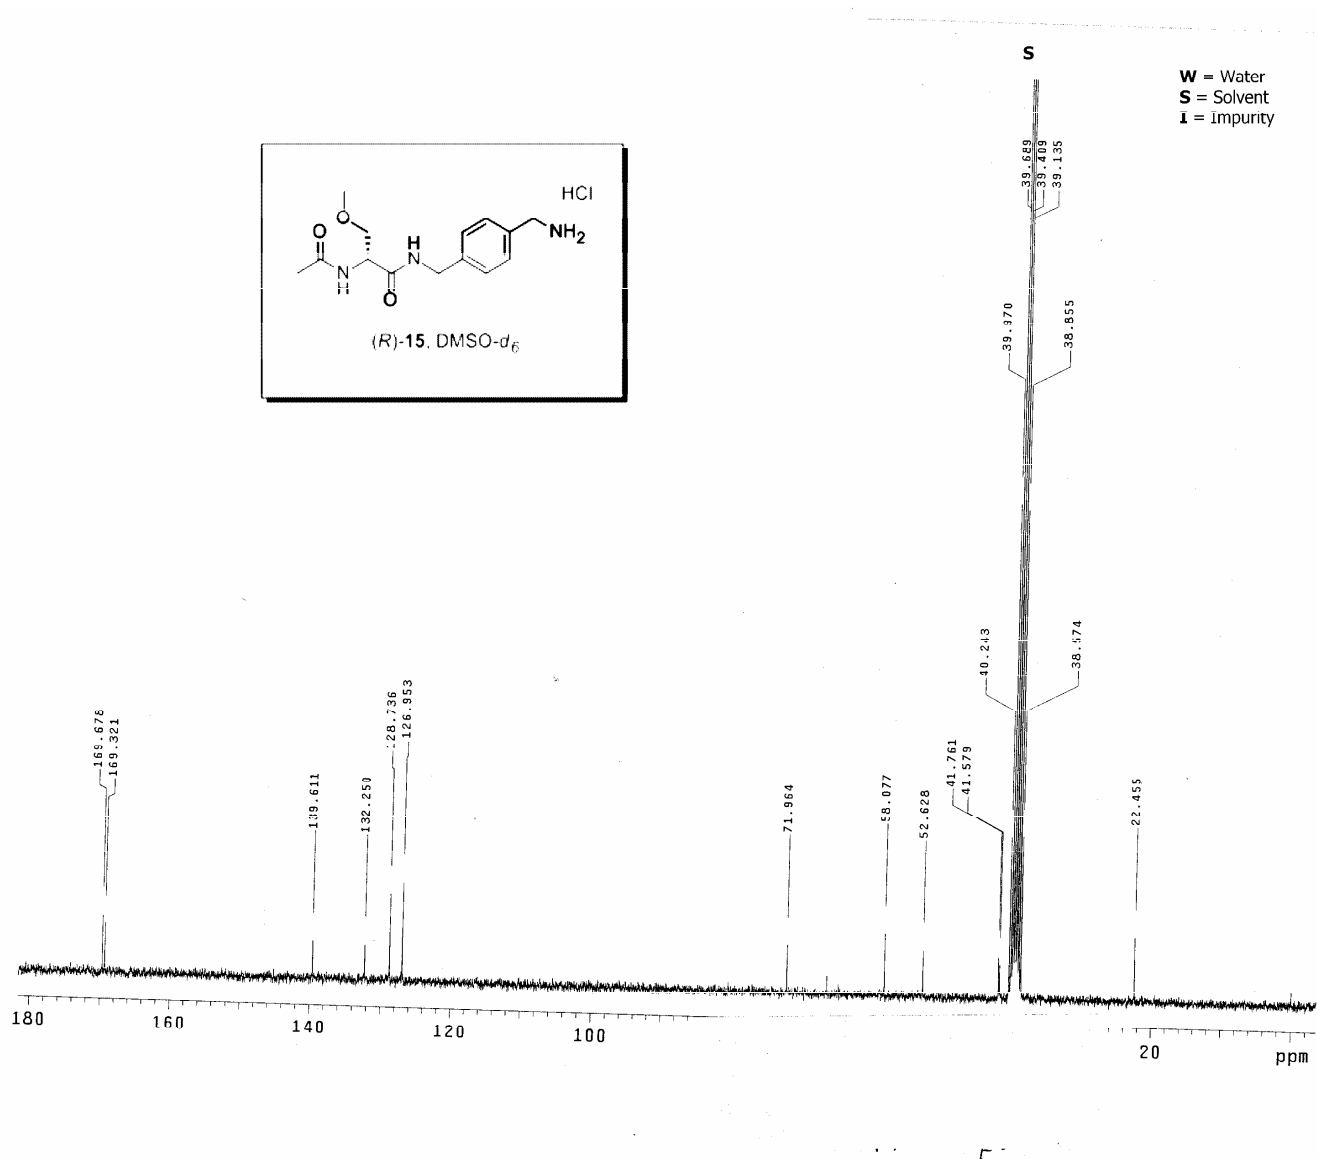

# Supporting Information

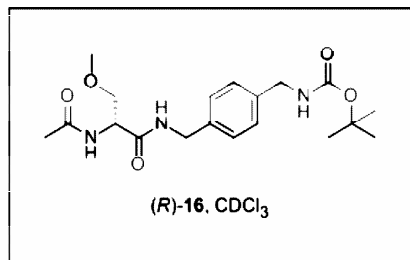

W = Water  
S = Solvent  
I = Impurity

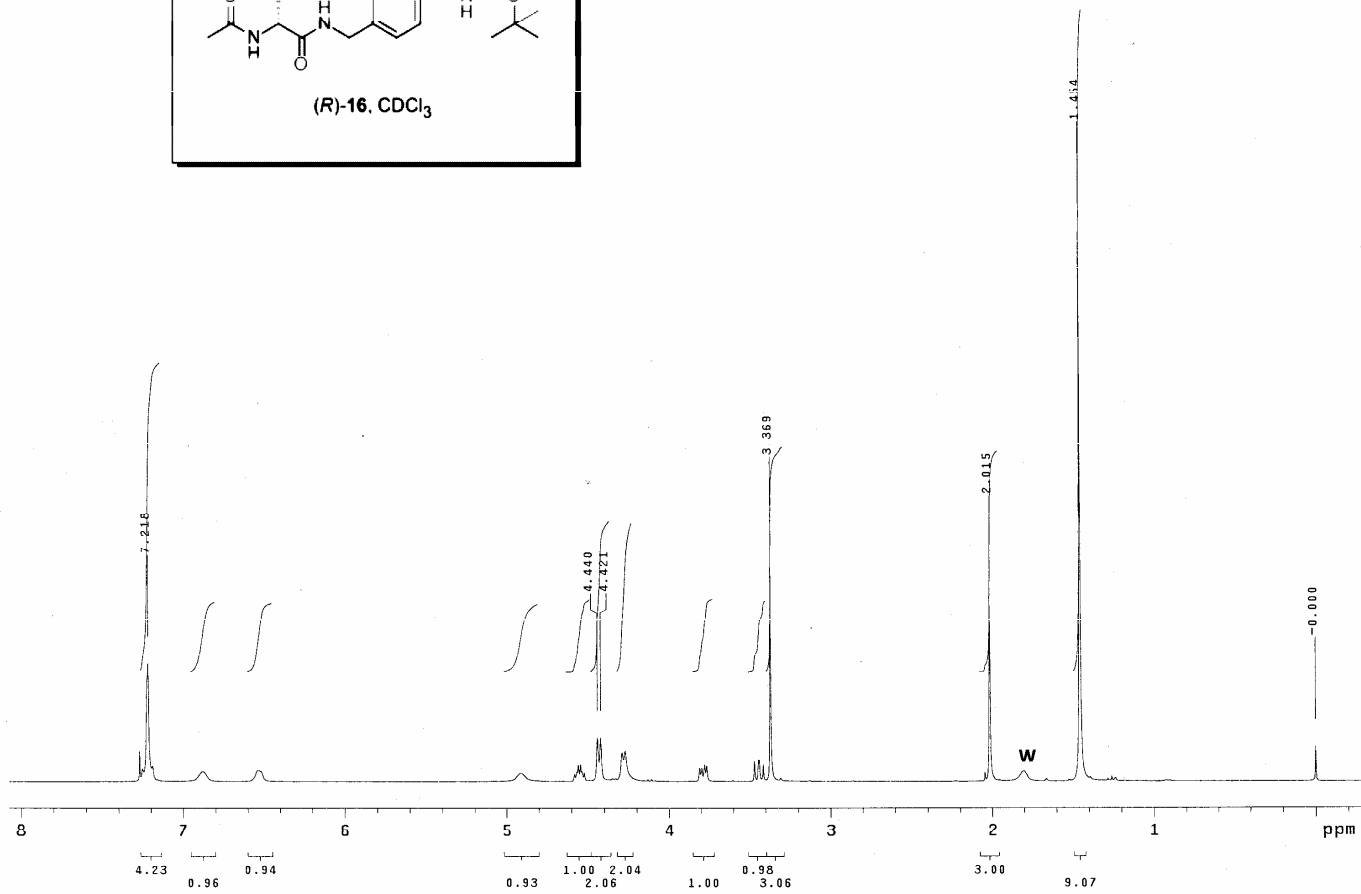

# Supporting Information

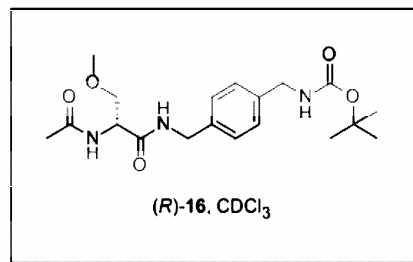

W = Water  
S = Solvent  
I = Impurity

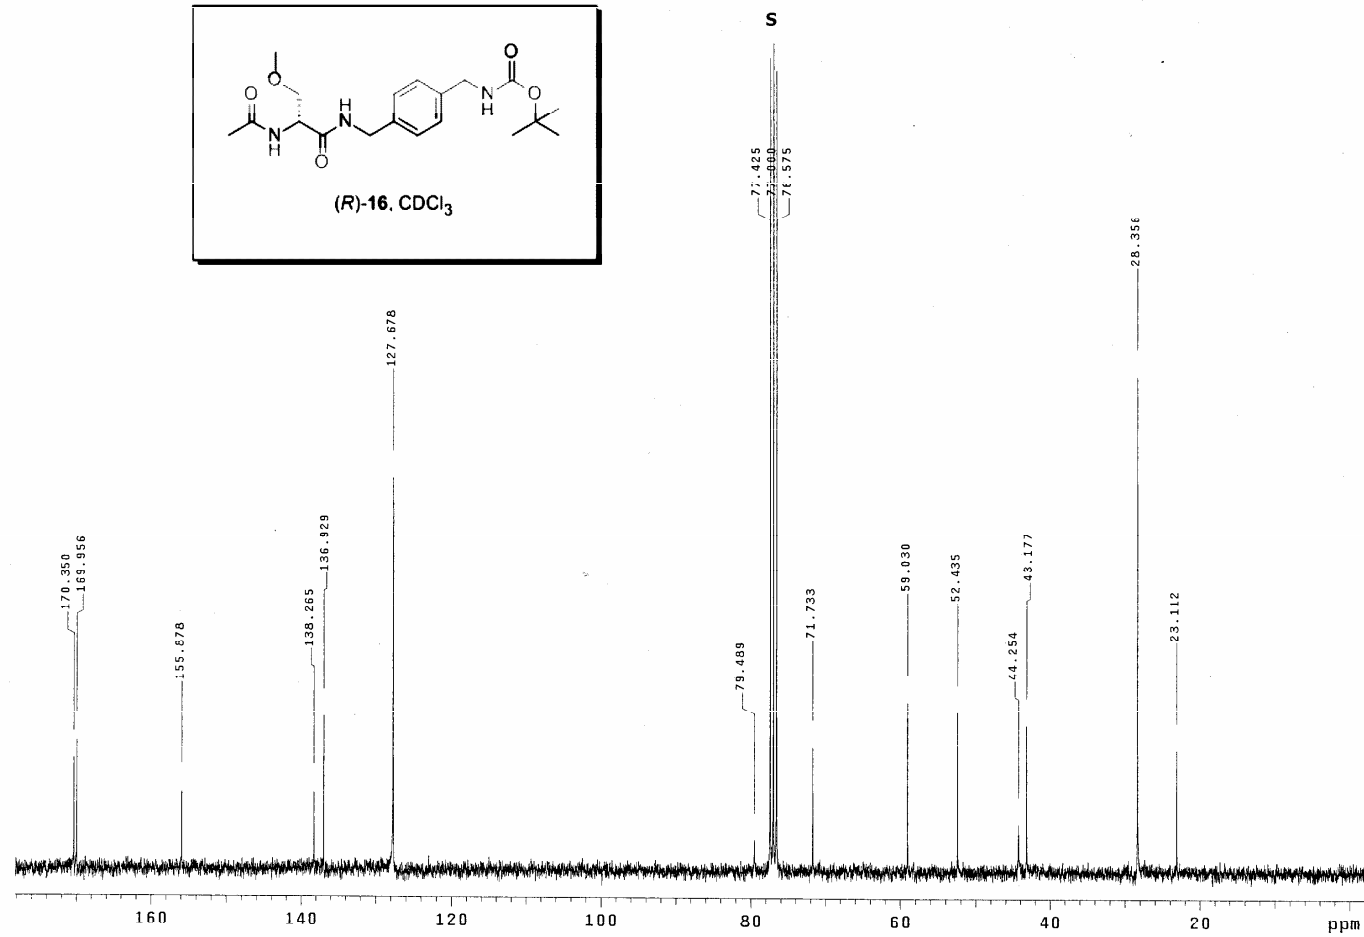

# Supporting Information

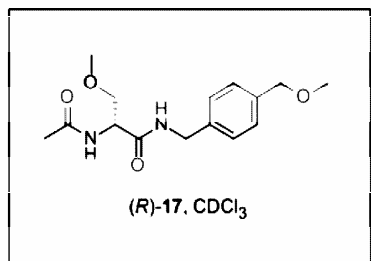

W = Water  
S = Solvent  
I = Impurity

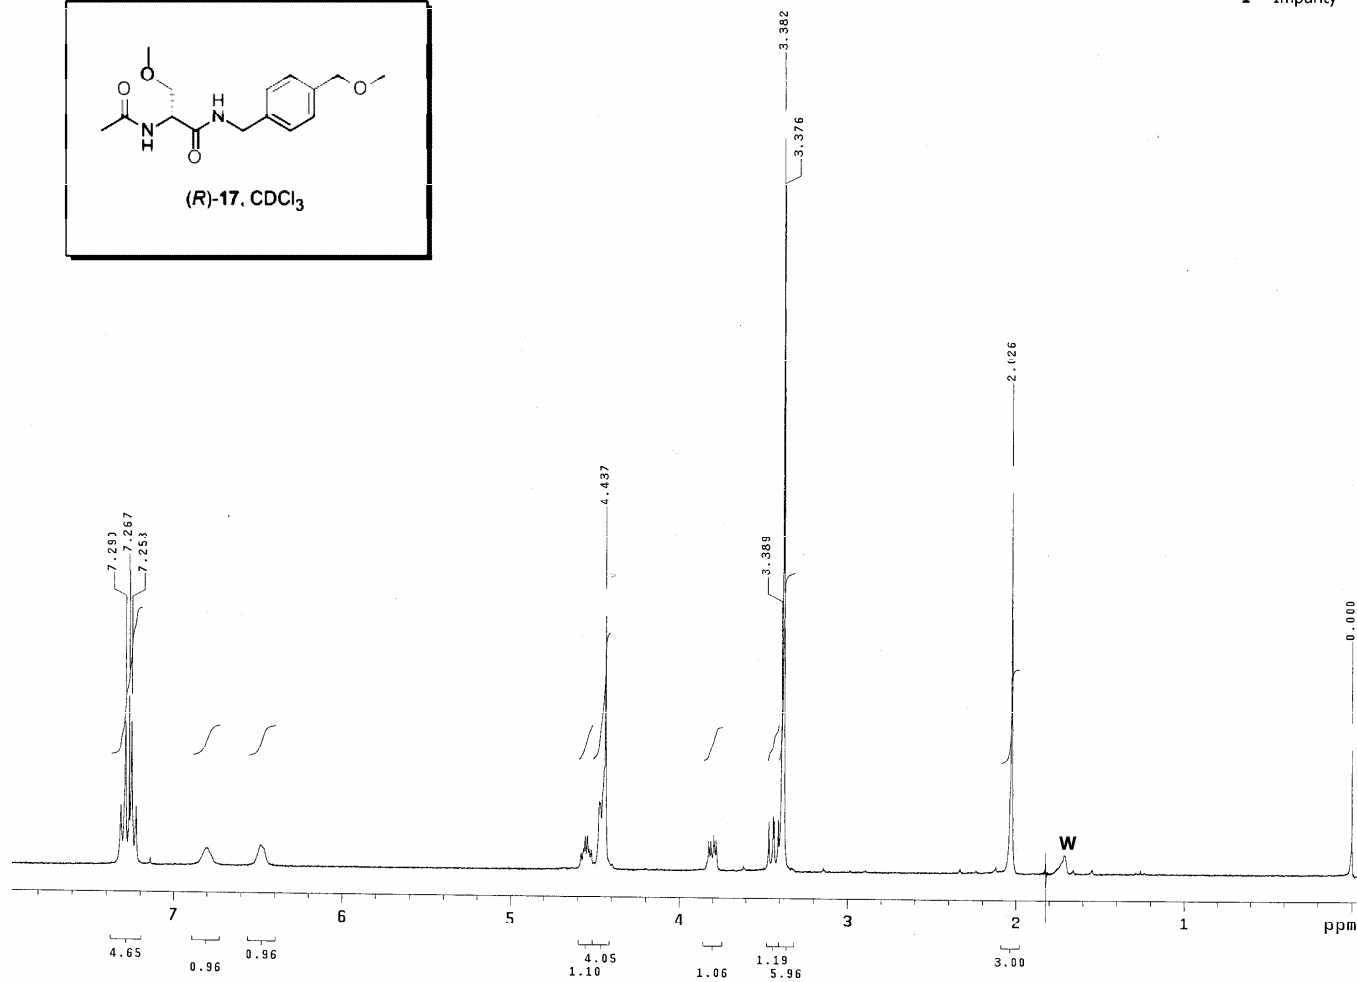



# Supporting Information

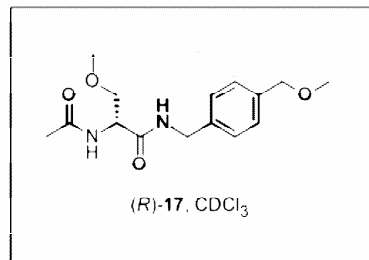

W = Water  
S = Solvent  
I = Impurity

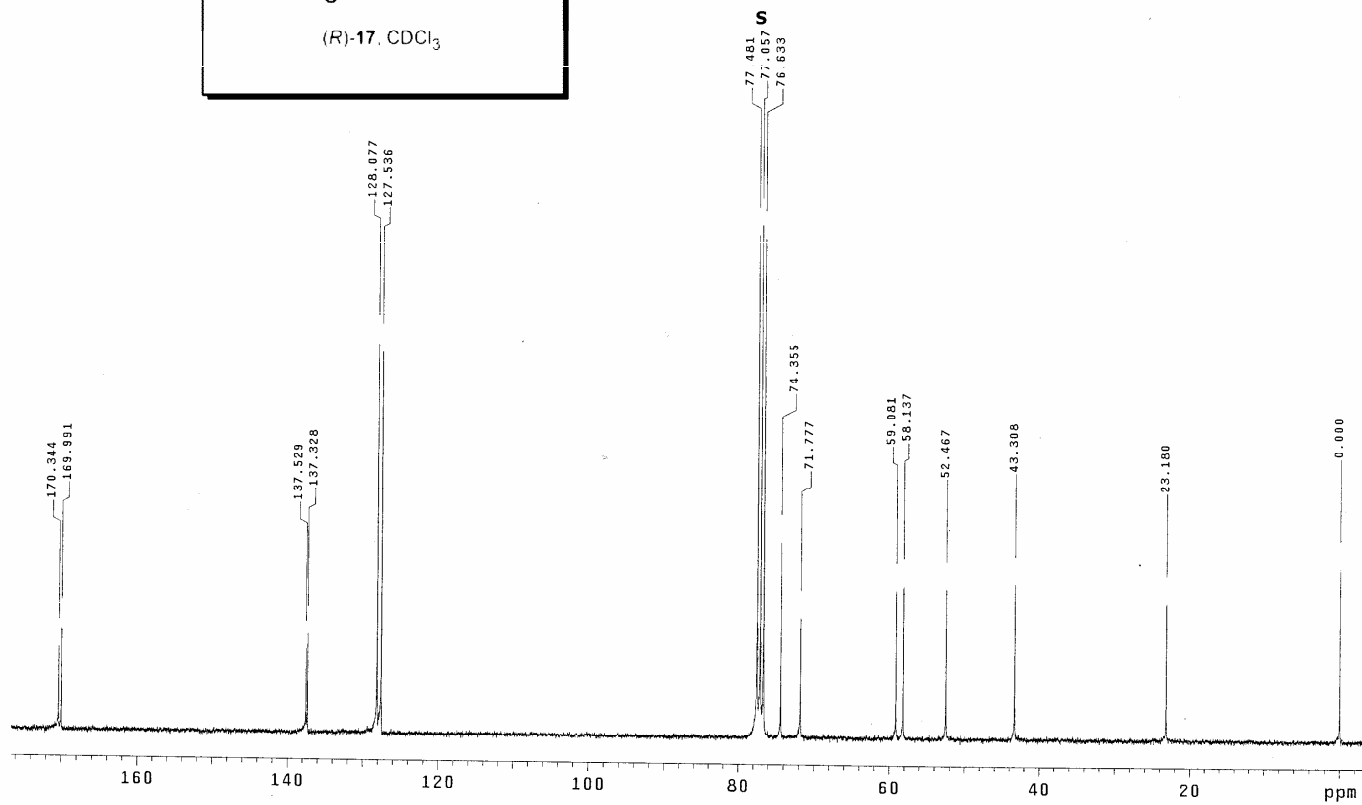

# Supporting Information

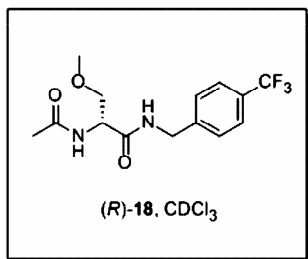

W = Water  
S = Solvent  
I = Impurity

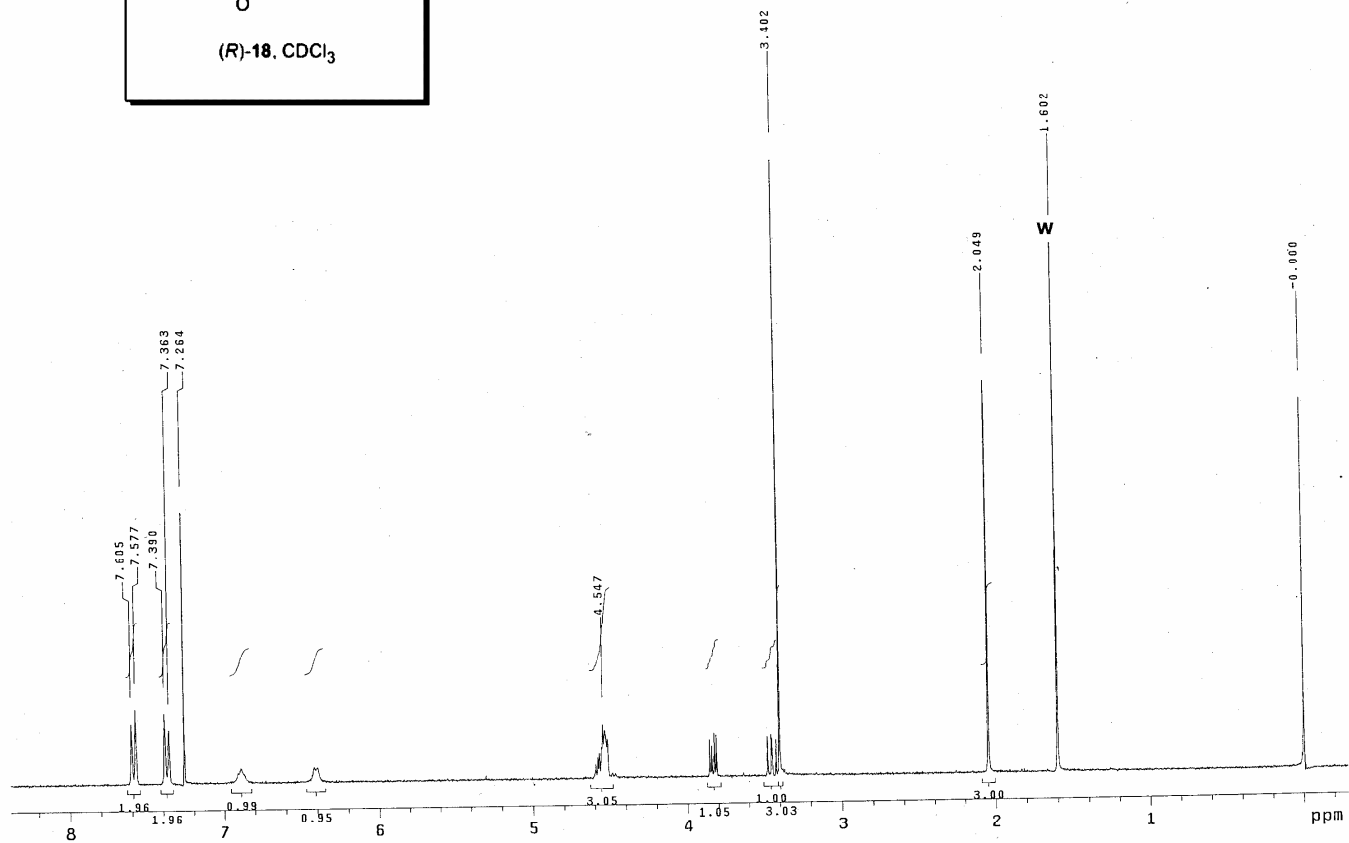

# Supporting Information

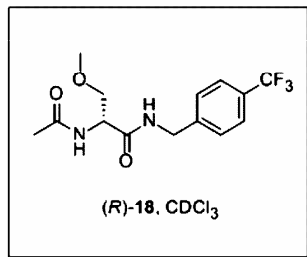

W = Water  
S = Solvent  
I = Impurity

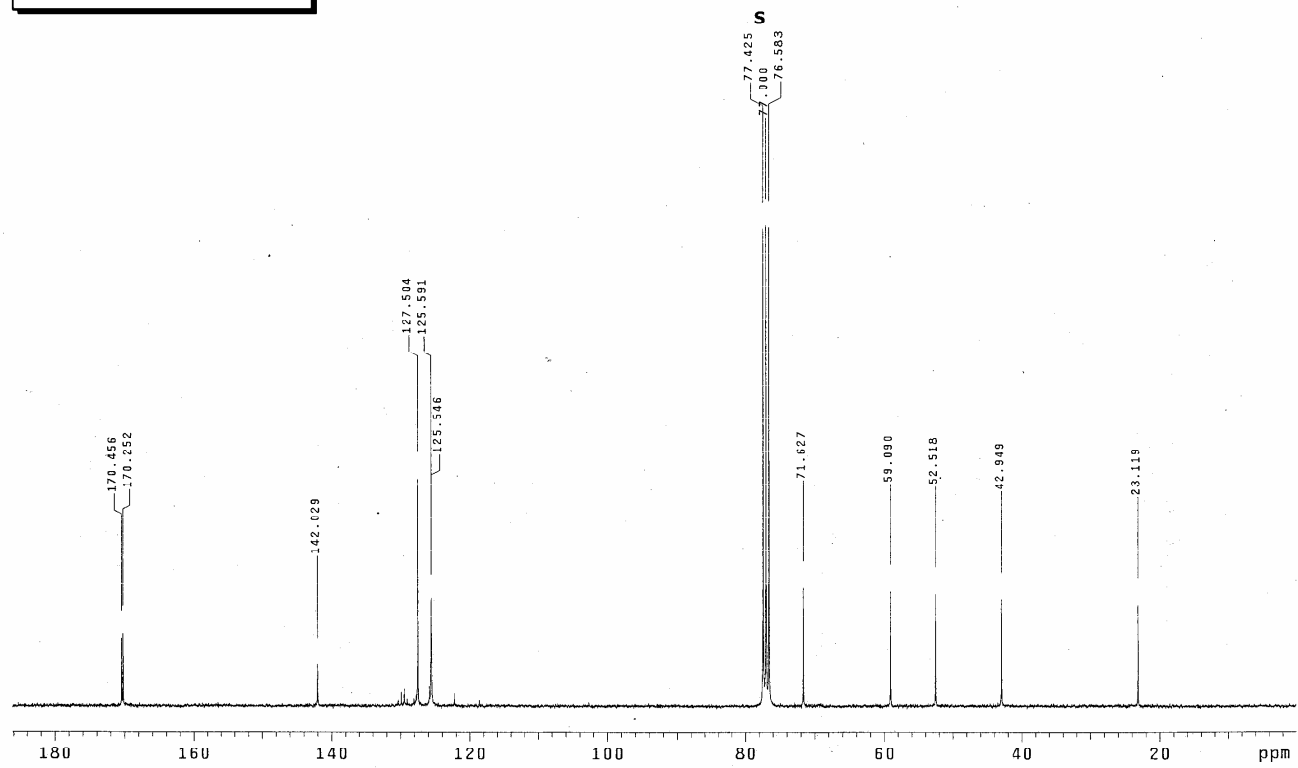

# Supporting Information

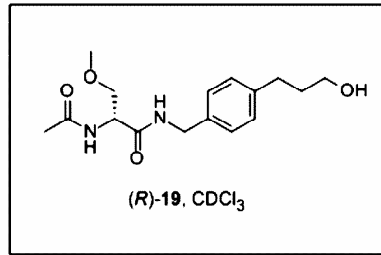

W = Water  
S = Solvent  
I = Impurity

Pulse Sequence: s2pul  
Solvent: CDCl<sub>3</sub>  
Ambient temperature  
GEMINI-300 "m569655"  
PULSE SEQUENCE  
Relax. delay 1.000 sec  
Pulse 33.3 degrees  
Acq. time 1.998 sec  
Width 4500.5 Hz  
16 repetitions  
DRSERVE H1, 300.0608943 MHz  
DATA PROCESSING  
Line broadening 0.5 Hz  
FT size 32768  
Total time 0 min, 59 sec

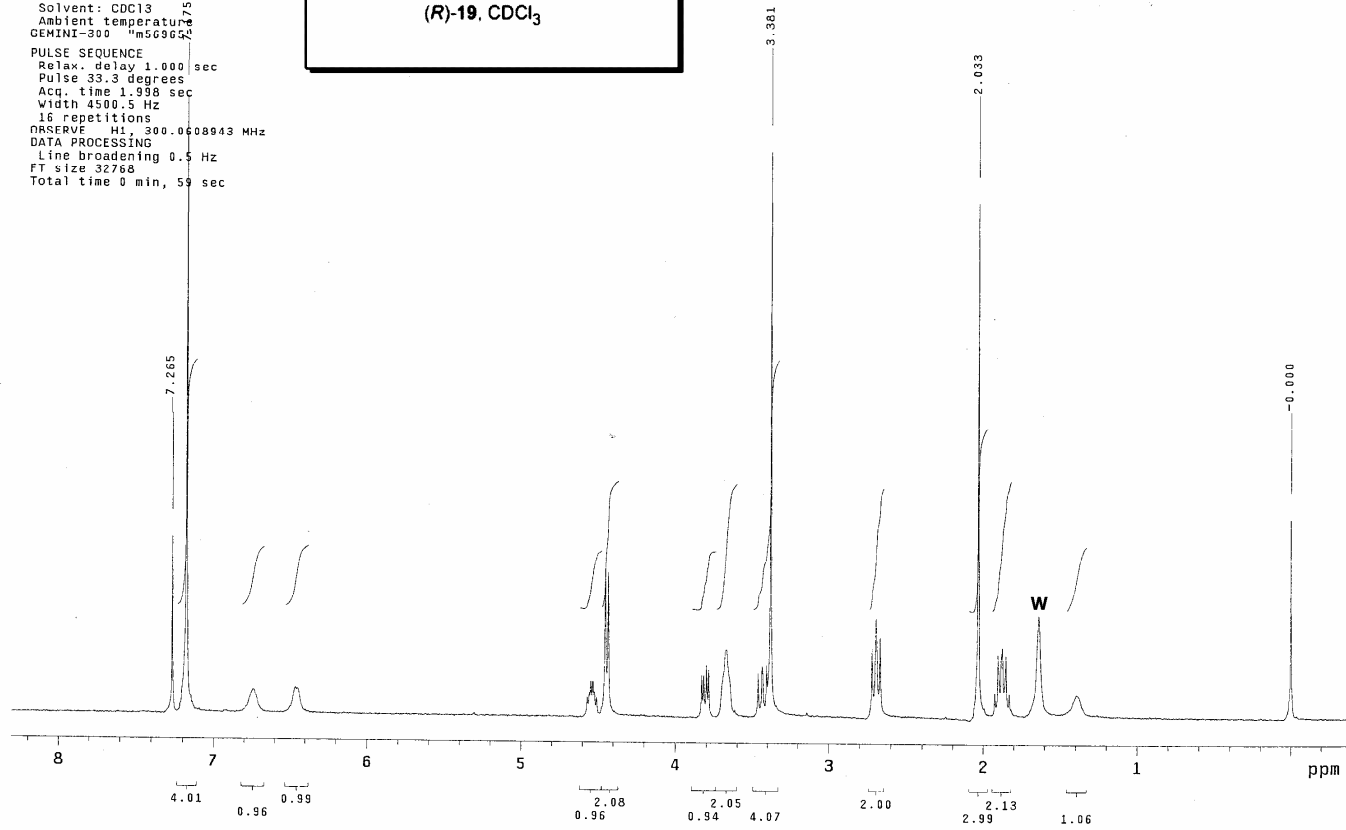

# Supporting Information

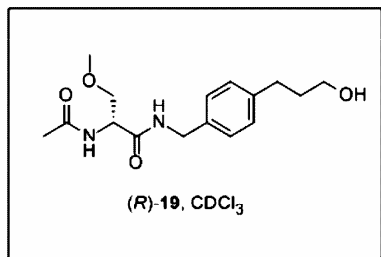

W = Water  
S = Solvent  
I = Impurity

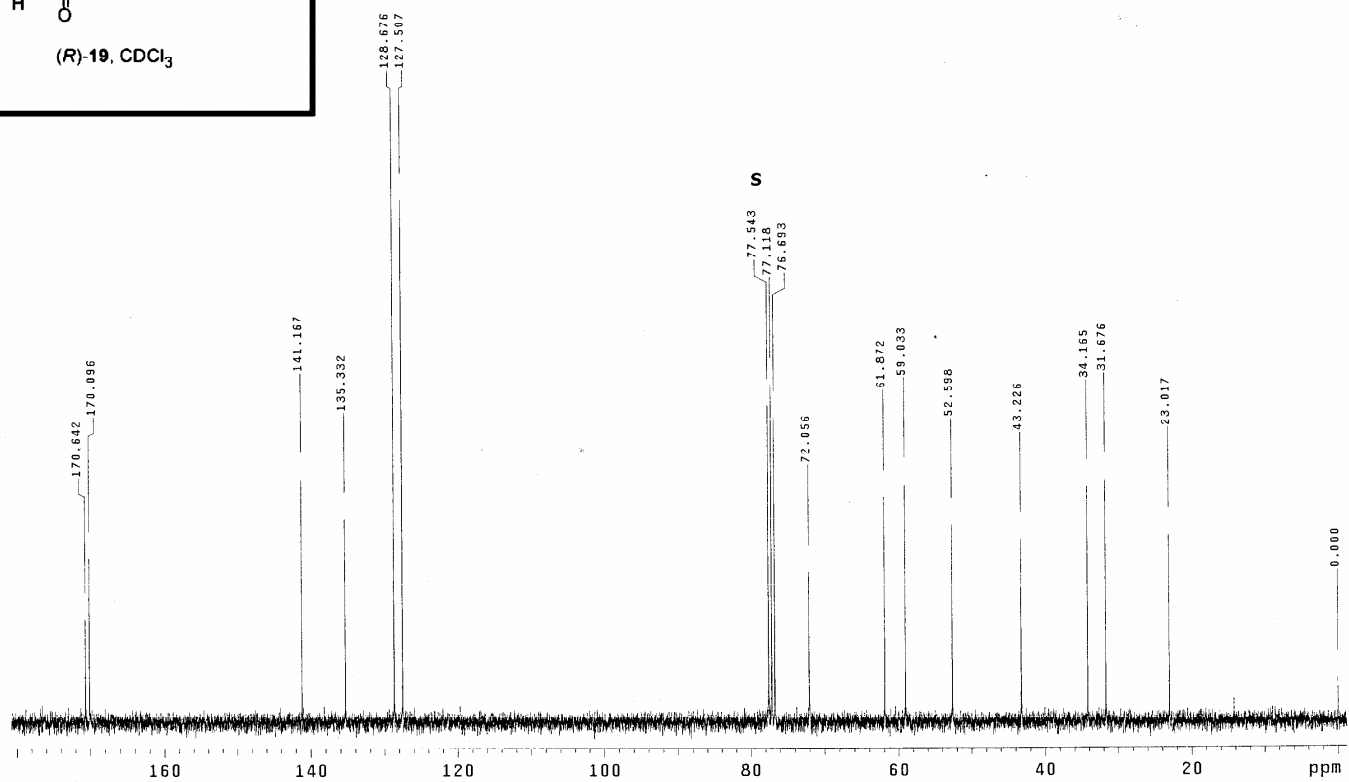

# Supporting Information

Solvent: CDCl<sub>3</sub>  
 Ambient temperature  
 GEMINI-300 "m56965"  
**PULSE SEQUENCE**  
 Relax. delay 1.000 scc  
 Pulse 23.7 degrees  
 Acq. time 3.998 sec  
 Width 4500 Hz  
 32 repetitions  
 OBSERVE H1, 300.0608932 MHz  
 DATA PROCESSING  
 FT size 65536  
 Total time 1 min, 58 sec

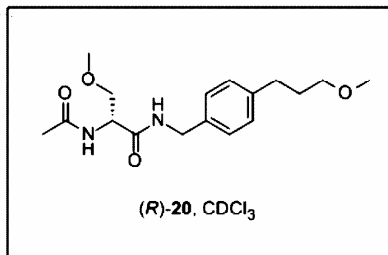

W = Water  
 S = Solvent  
 I = Impurity

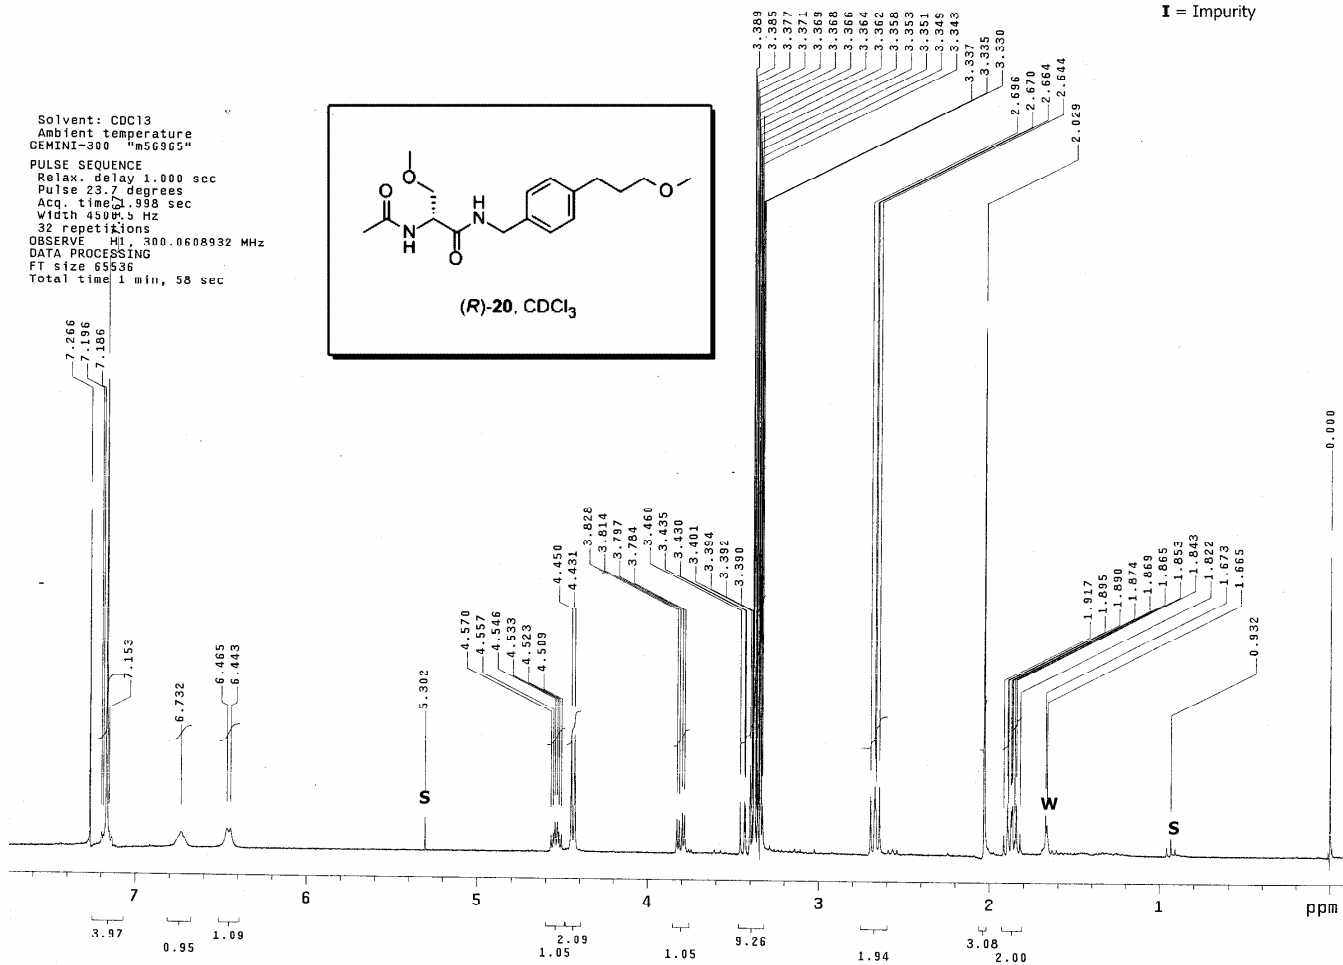

# Supporting Information

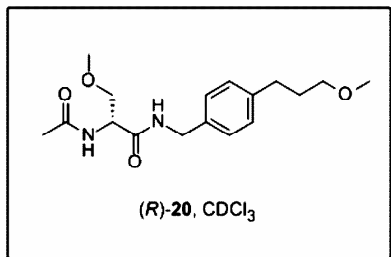

W = Water  
S = Solvent  
I = Impurity

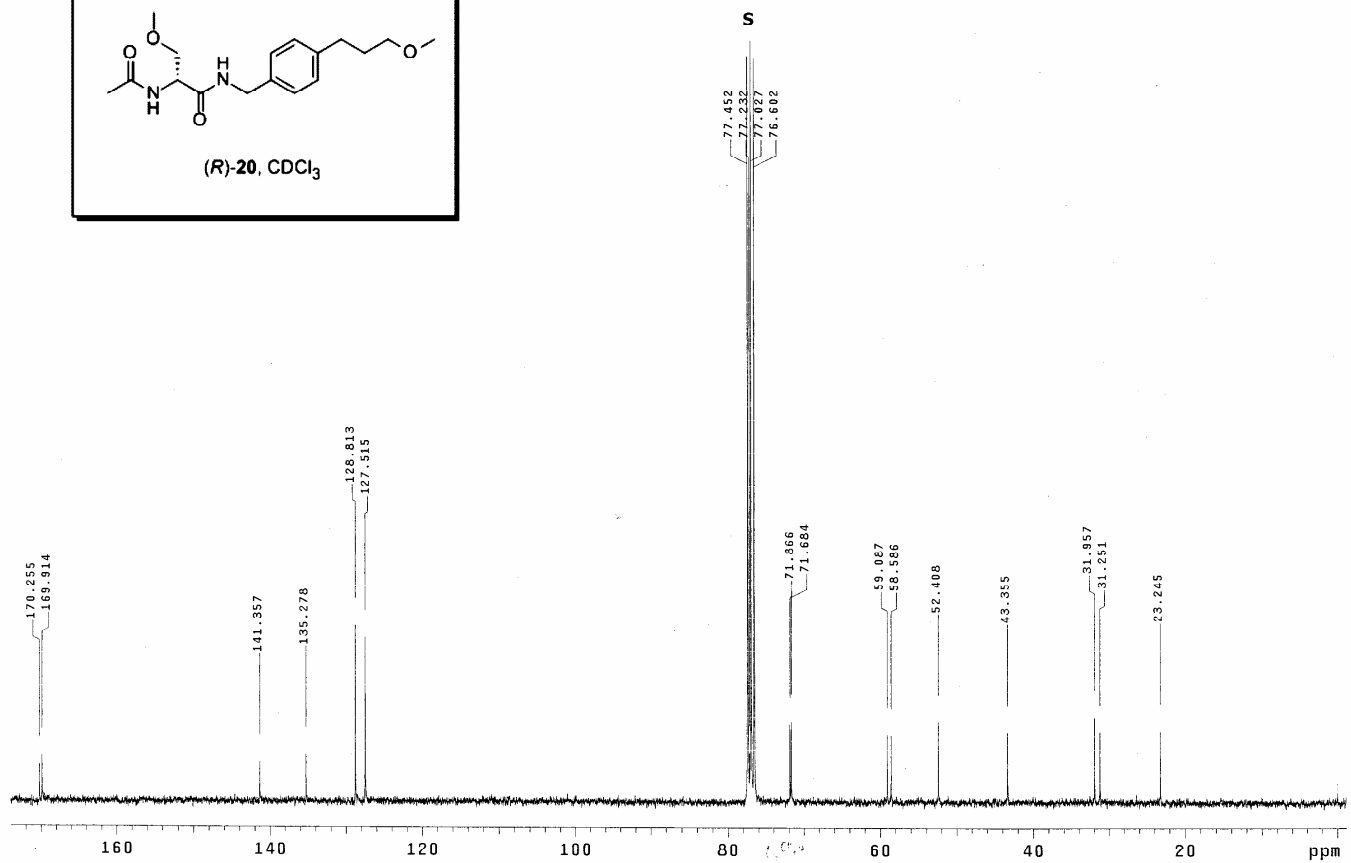

# Supporting Information

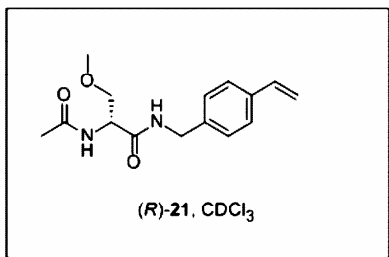

W = Water  
S = Solvent  
I = Impurity

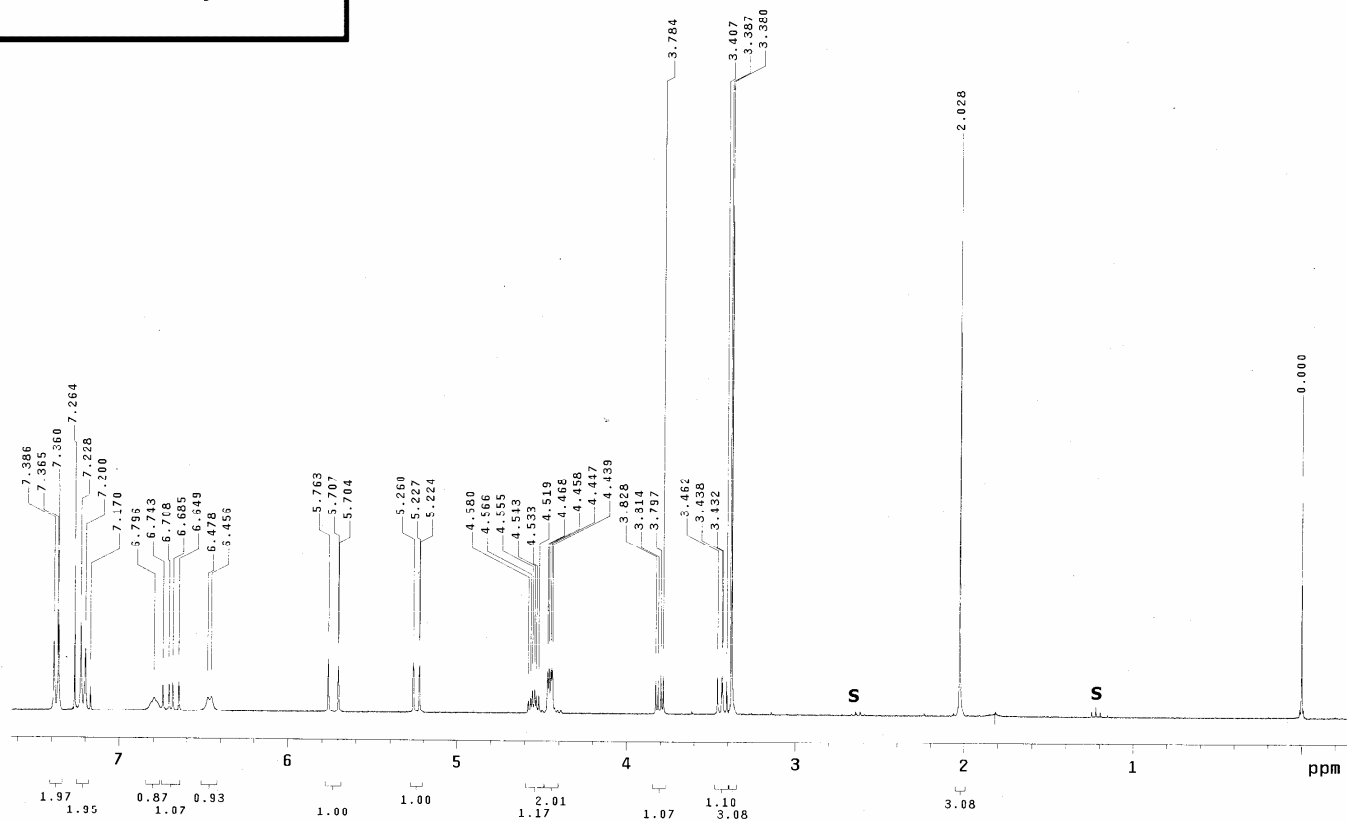



# Supporting Information

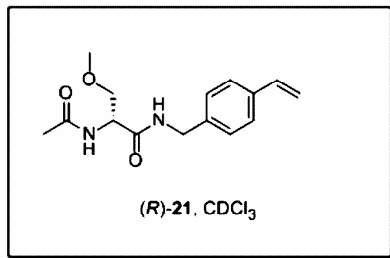

W = Water  
S = Solvent  
I = Impurity

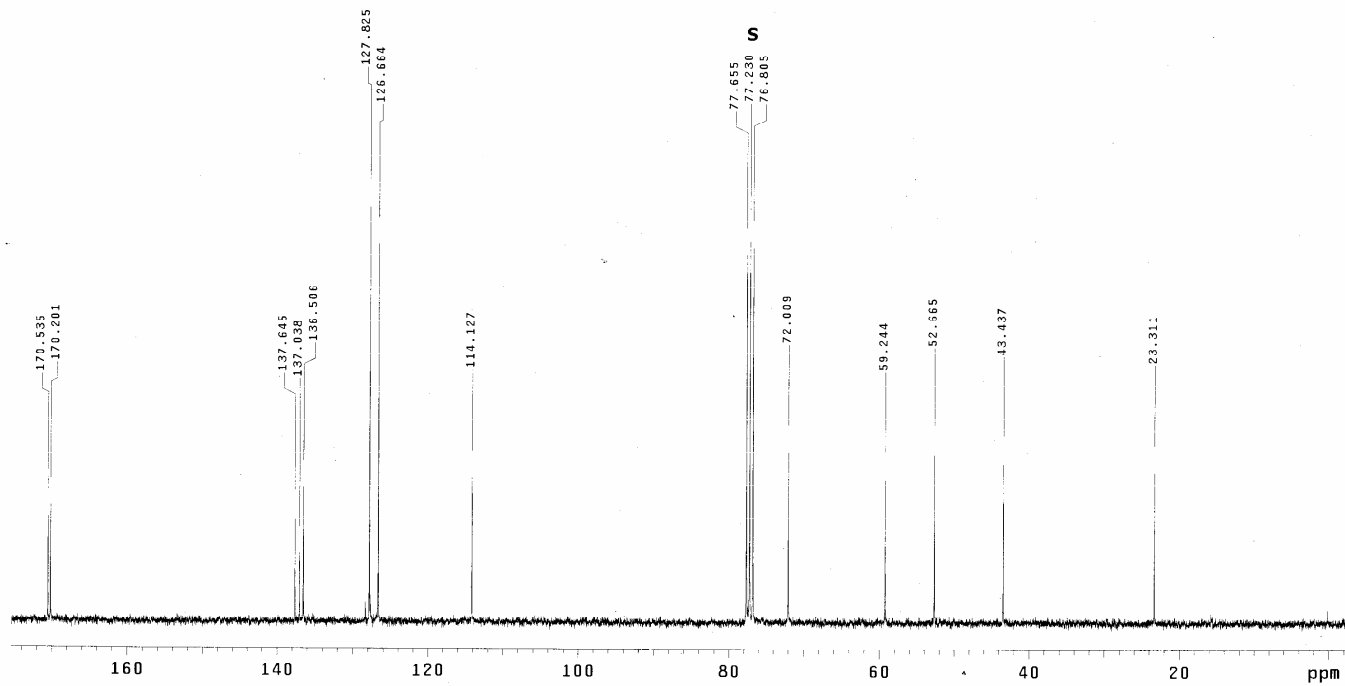

# Supporting Information

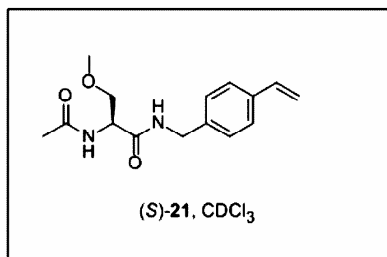

W = Water  
S = Solvent  
I = Impurity

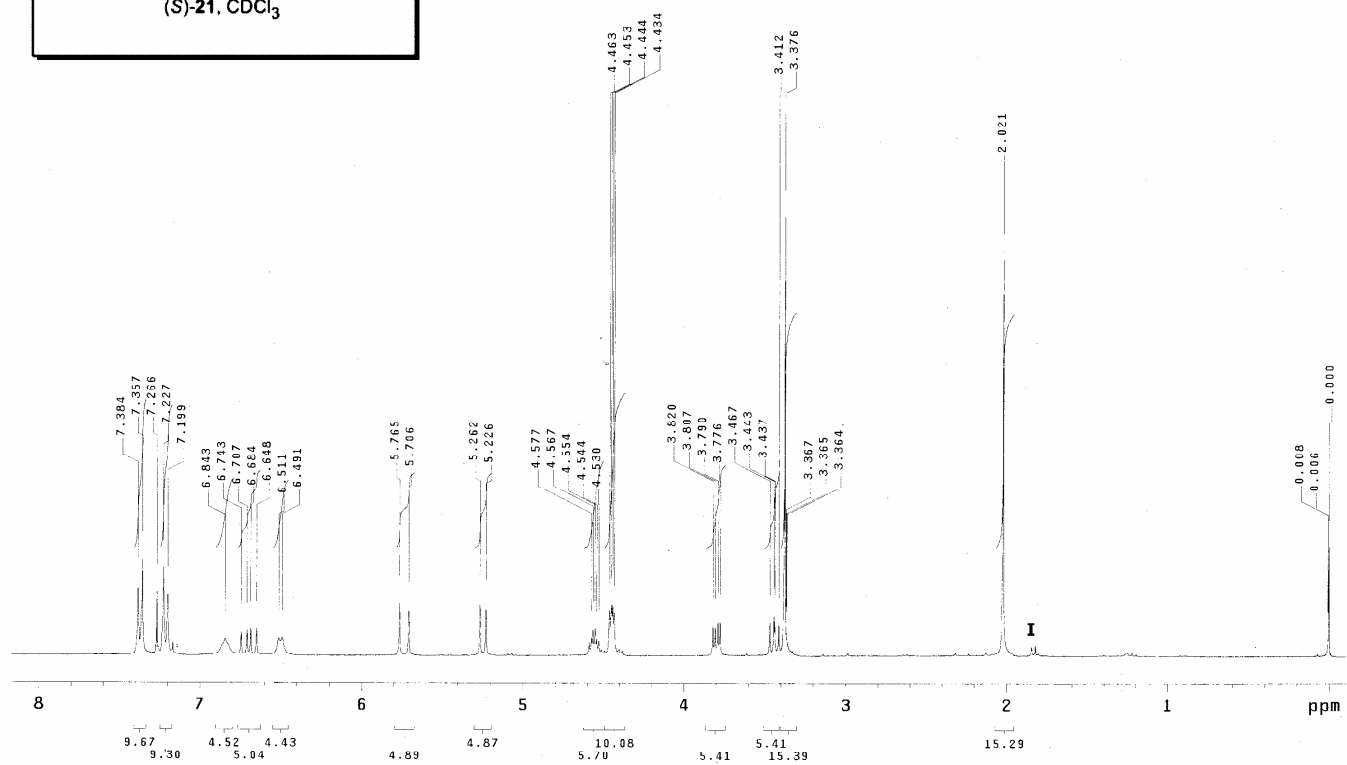

# Supporting Information

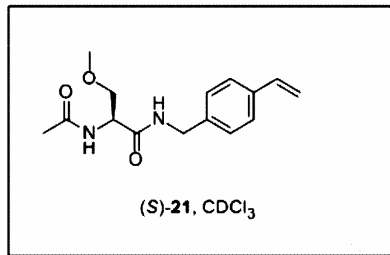

W = Water  
S = Solvent  
I = Impurity

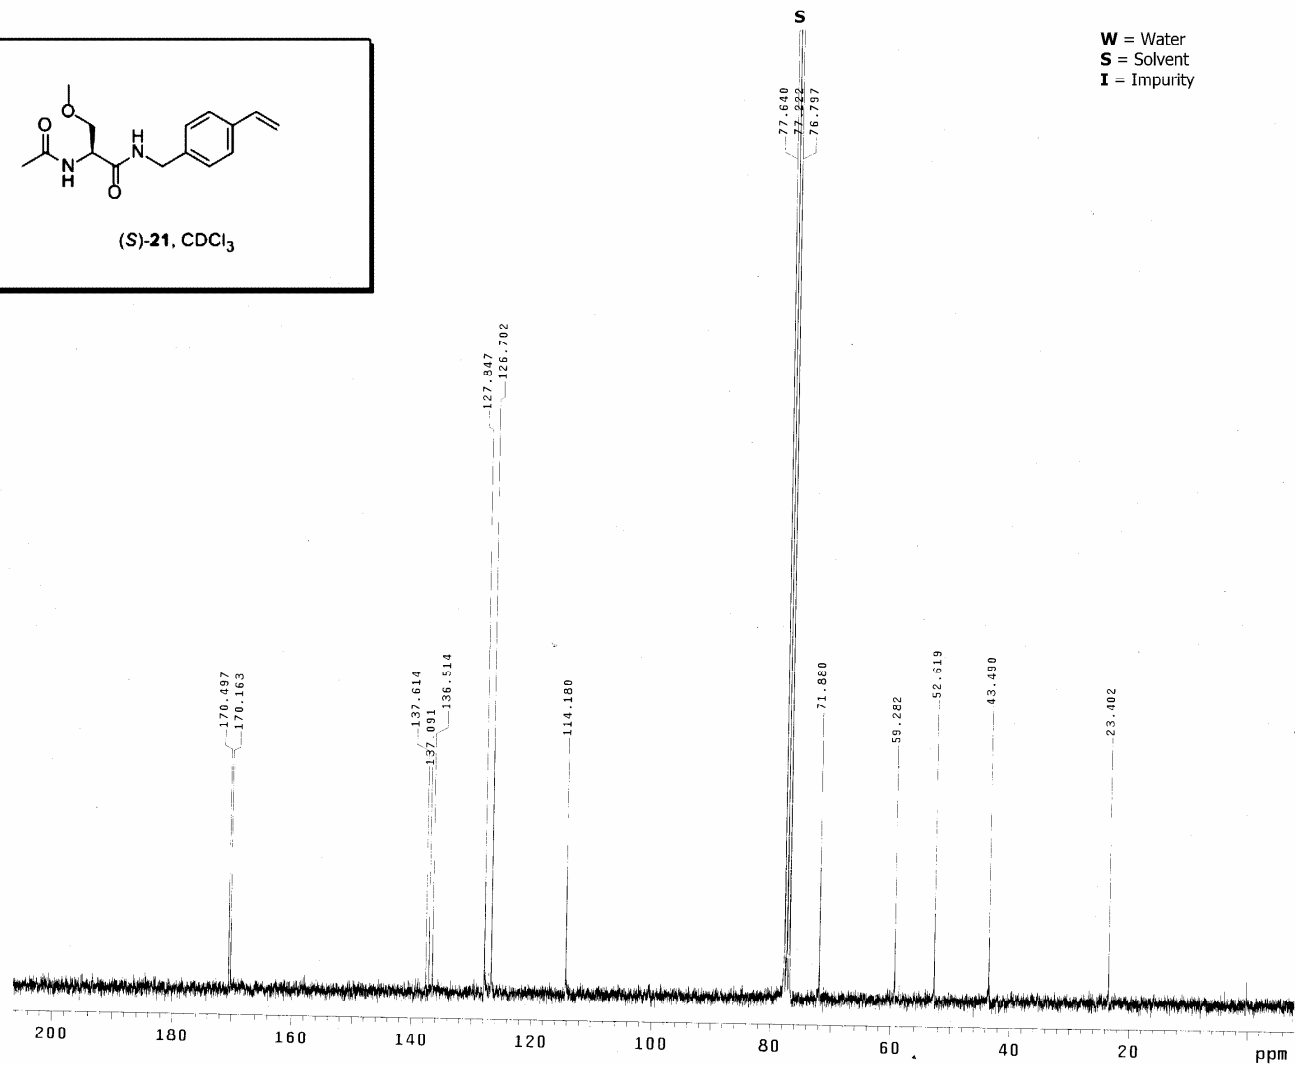

# Supporting Information

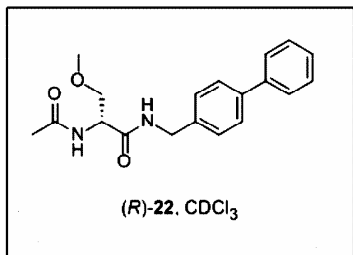

W = Water  
S = Solvent  
I = Impurity

Solvent: CDCl<sub>3</sub>  
Ambient Temperature: 25.00  
GEMINI-300 500.136 MHz  
PULSE SEQUENCE zgpg30  
Relax. delay 1.000 sec  
Pulse 33.3 degrees  
Acq. time 1.998 sec  
Width 4500.5 Hz  
16 repetitions  
OBSERVE H1, 300.0608948 MHz  
DATA PROCESSING  
FT size 32768  
Total time 0 min, 59 sec

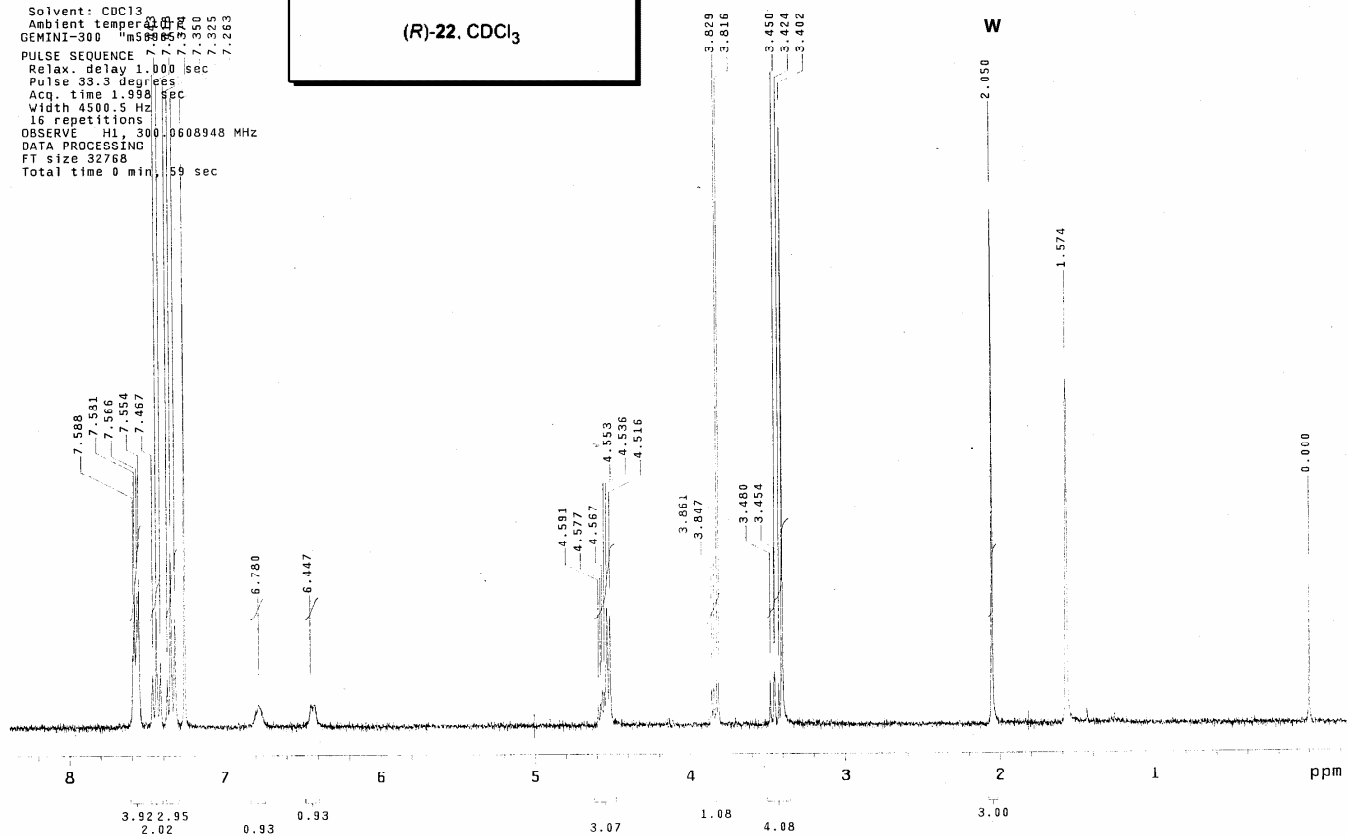

# Supporting Information

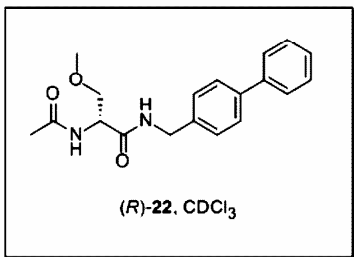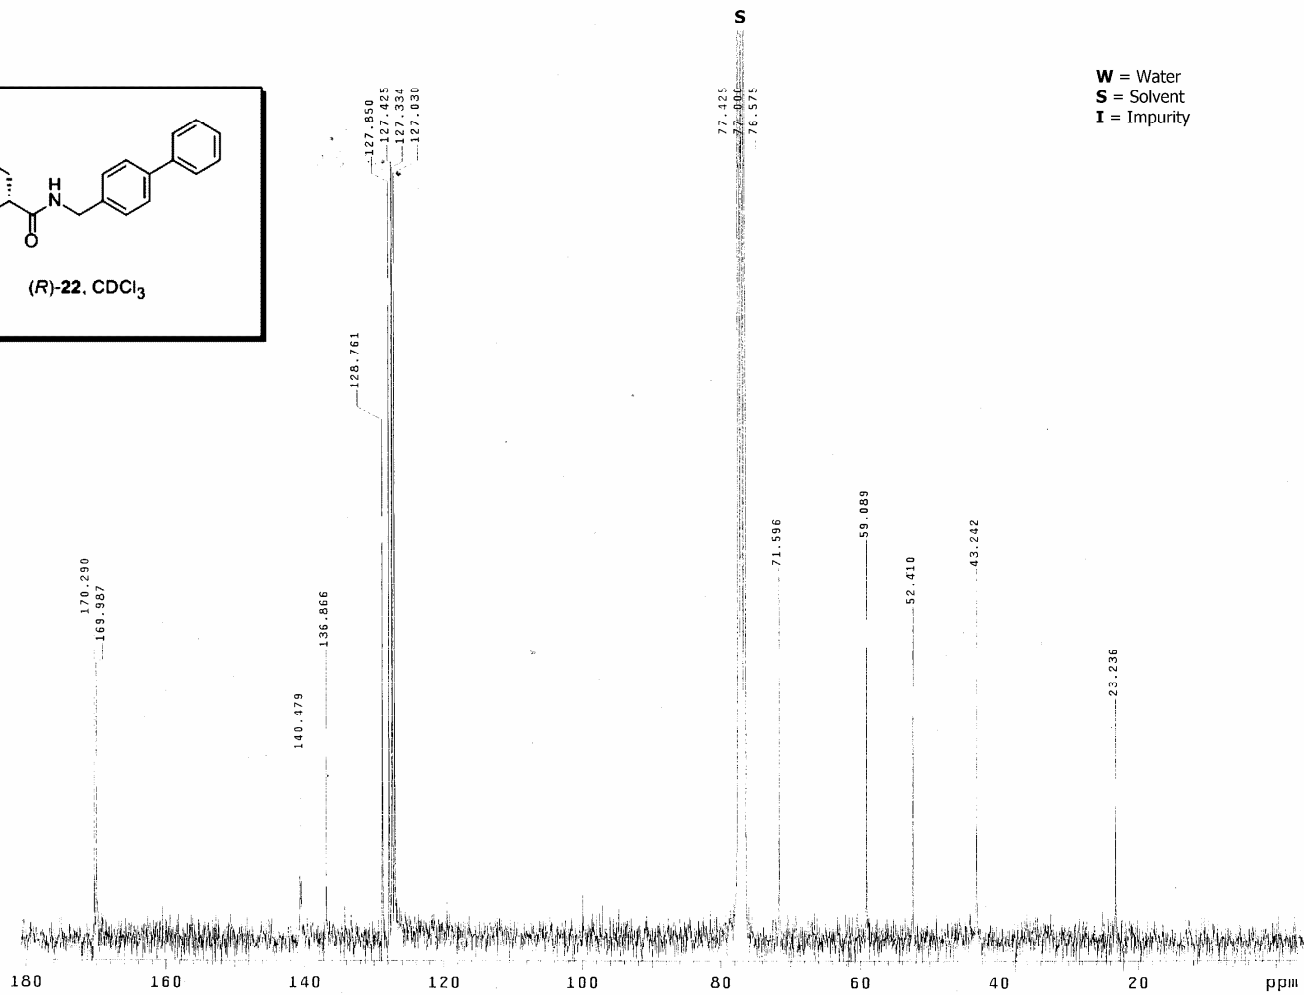

W = Water  
S = Solvent  
I = Impurity

# Supporting Information

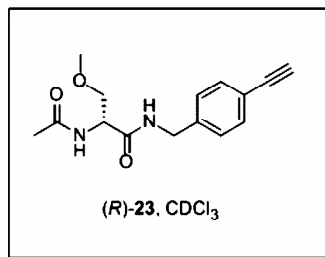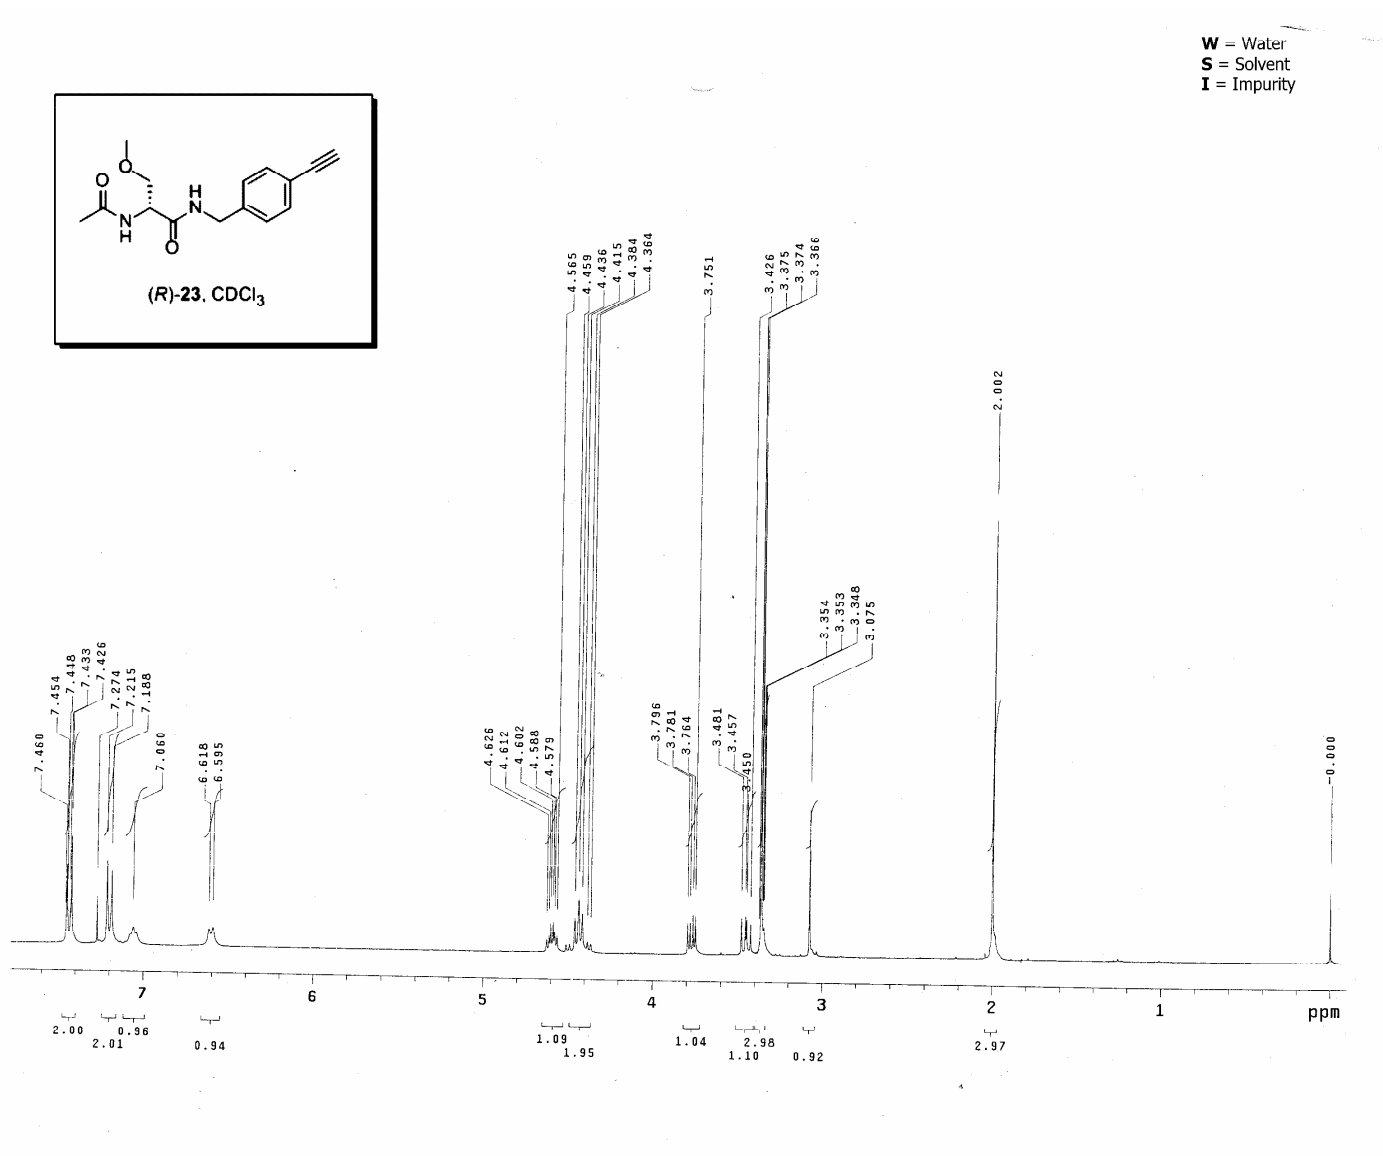

# Supporting Information

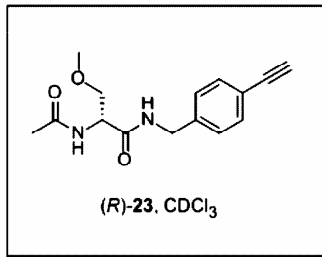

W = Water  
S = Solvent  
I = Impurity

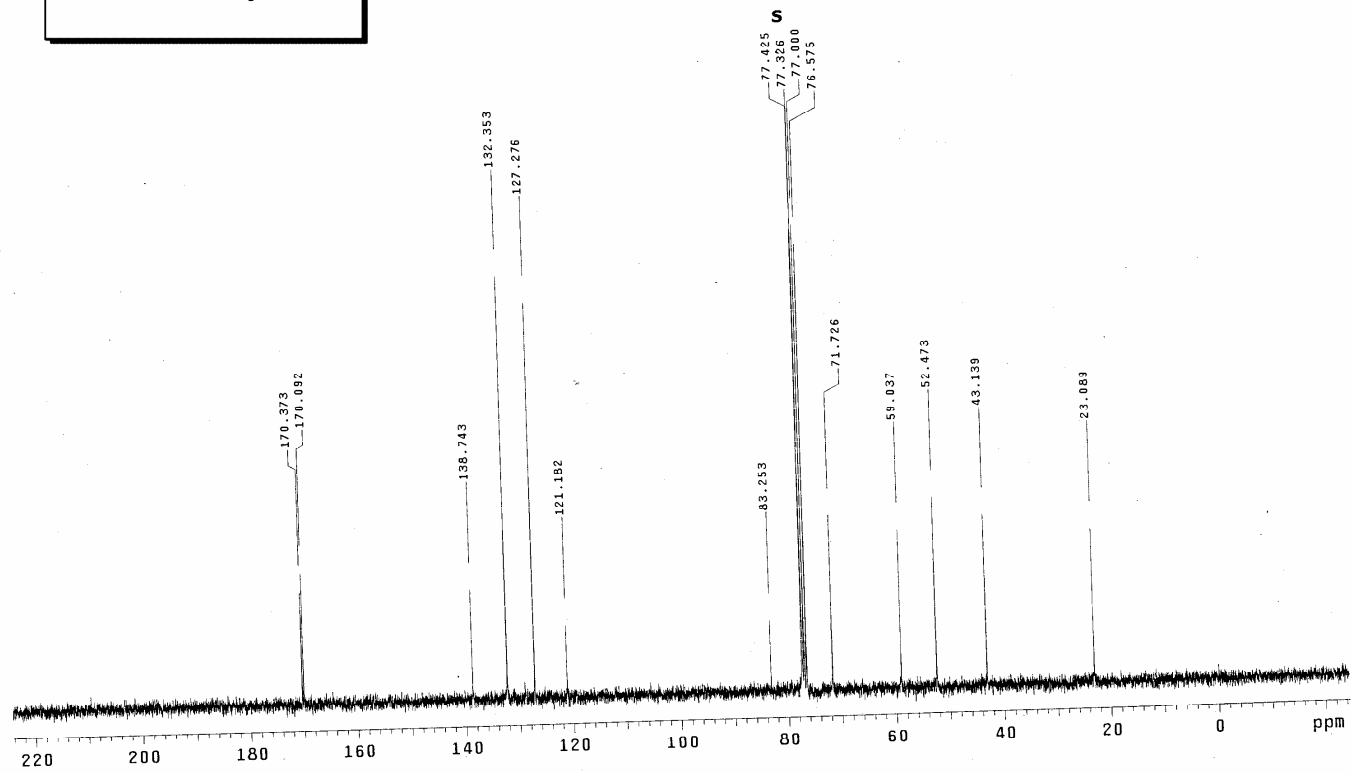

# Supporting Information

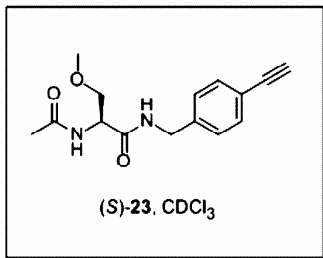

W = Water  
S = Solvent  
I = Impurity

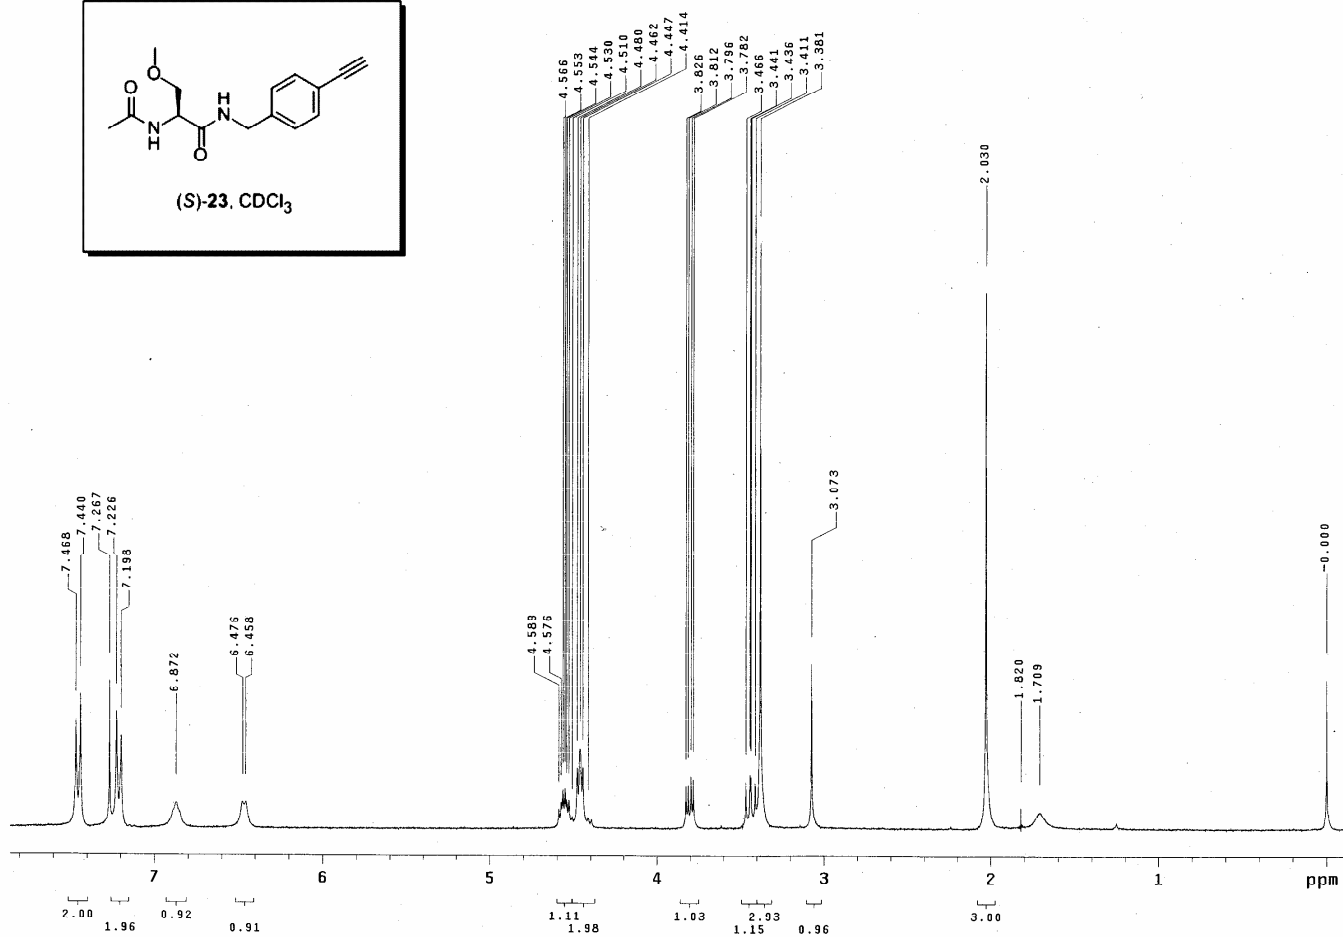



# Supporting Information

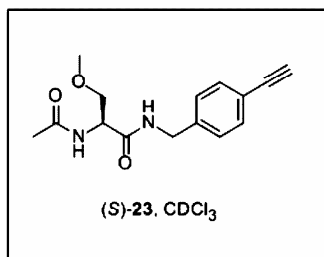

W = Water  
S = Solvent  
I = Impurity

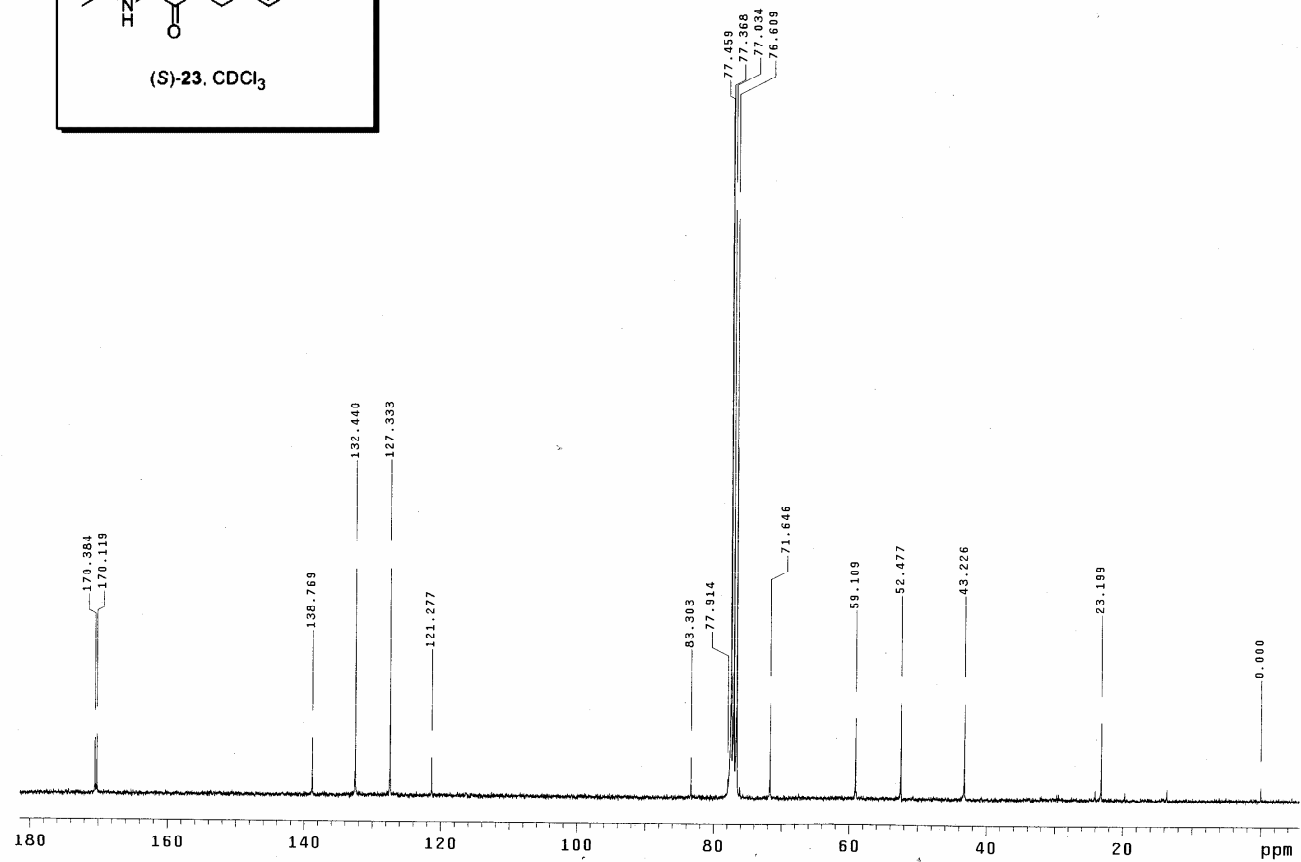

# Supporting Information

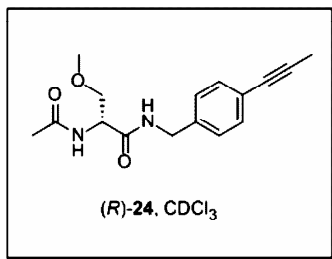

W = Water  
S = Solvent  
I = Impurity

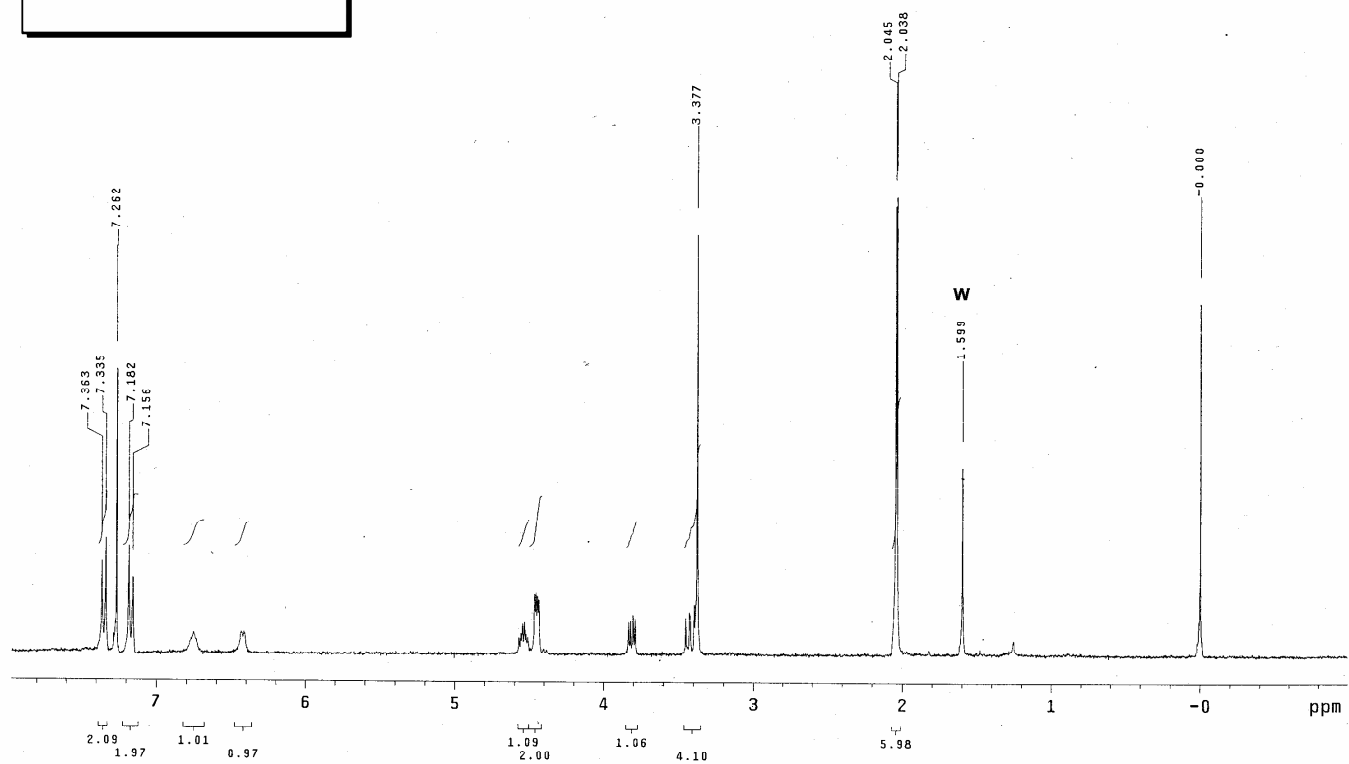

# Supporting Information

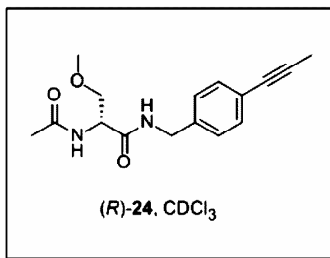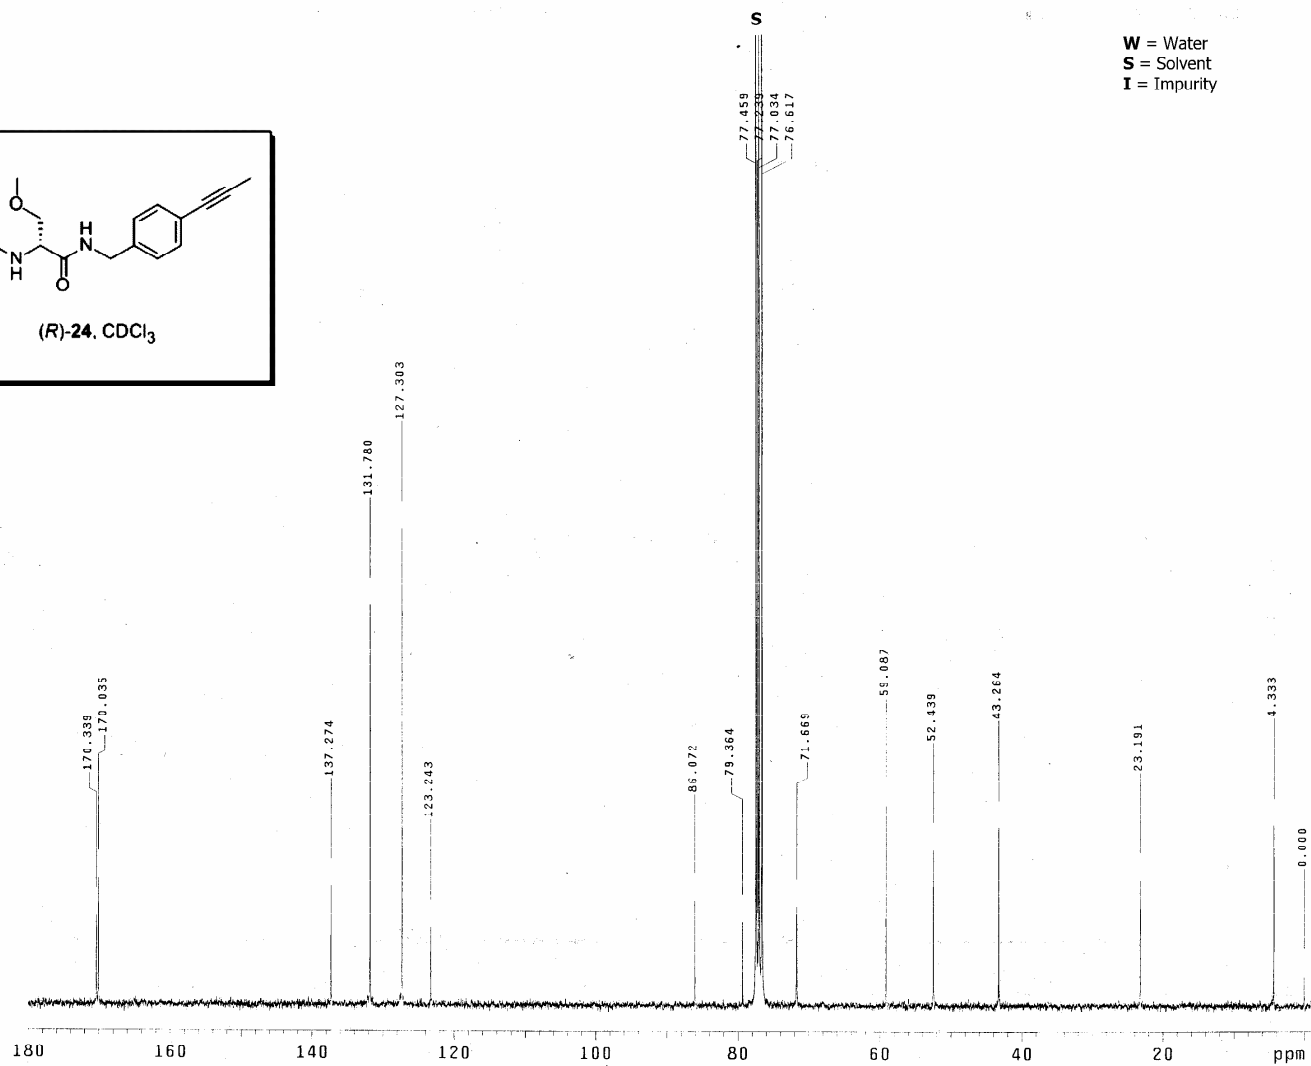

Supplement: NIHMS168020-supplement-1_si_001.pdf [file NIHMS168020-supplement-1_si_001.pdf]
