# Supplementary material
Source: PubMed Central journal article supplement (PMC2818974)
Supplement: NIHMS168020-supplement-2_si_002.pdf [file NIHMS168020-supplement-2_si_002.pdf]

*Supporting Information*

*Supporting Information*

**Synthesis and Anticonvulsant Activities of *N*-  
(4'-Substituted)benzyl (*R*)-2-Acetamido-3-  
methoxypropionamides**

*Christophe Salomé,<sup>1</sup> Elise Salomé-Grosjean,<sup>1</sup> Ki Duk Park,<sup>1</sup> Pierre  
Morieux,<sup>1</sup> Robert Swendiman,<sup>1</sup> Erica DeMarco,<sup>1</sup> James P. Stables,<sup>2</sup> and  
Harold Kohn\*<sup>1,3</sup>*

<sup>1</sup>Division of Medicinal Chemistry and Natural Products, UNC Eshelman School of Pharmacy,  
University of North Carolina, Chapel Hill, North Carolina 27599-7568, USA

<sup>2</sup>Anticonvulsant Screening Program, National Institute of Neurological Disorders and Stroke,  
National Institutes of Health, 6001 Executive Blvd., Suite 2106, Rockville, MD 20892-9523, USA

<sup>3</sup>Department of Chemistry,  
University of North Carolina, Chapel Hill, North Carolina 27599-3290, USA

# Supporting Information

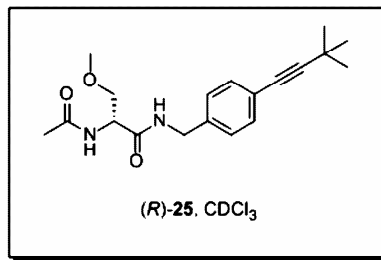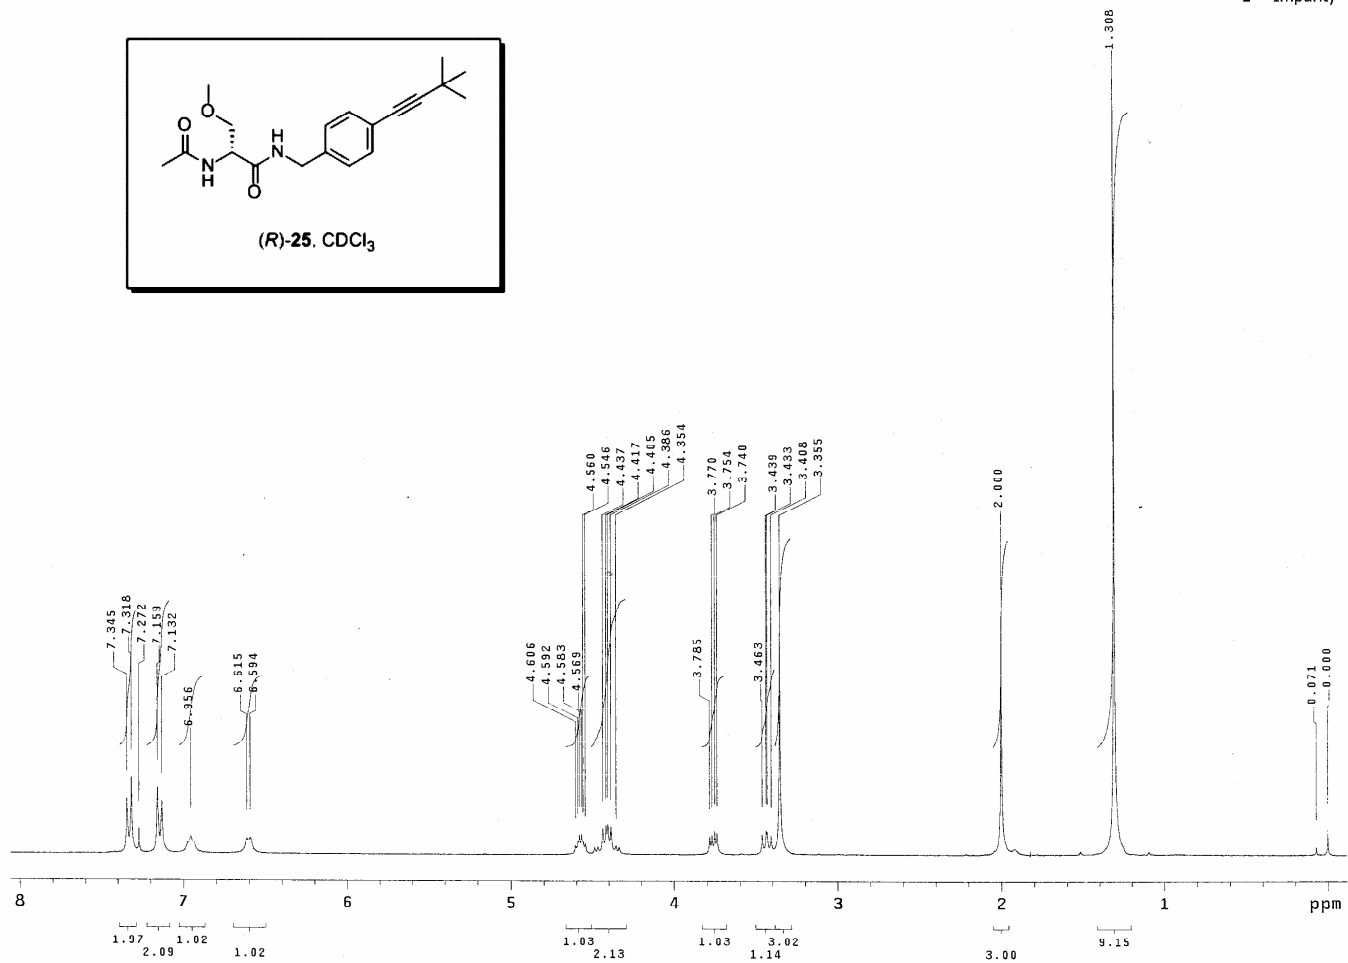

# Supporting Information

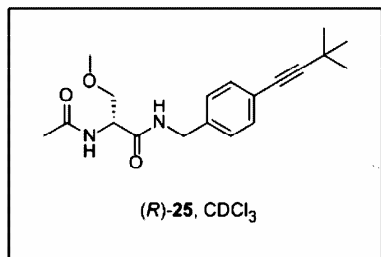

W = Water  
S = Solvent  
I = Impurity

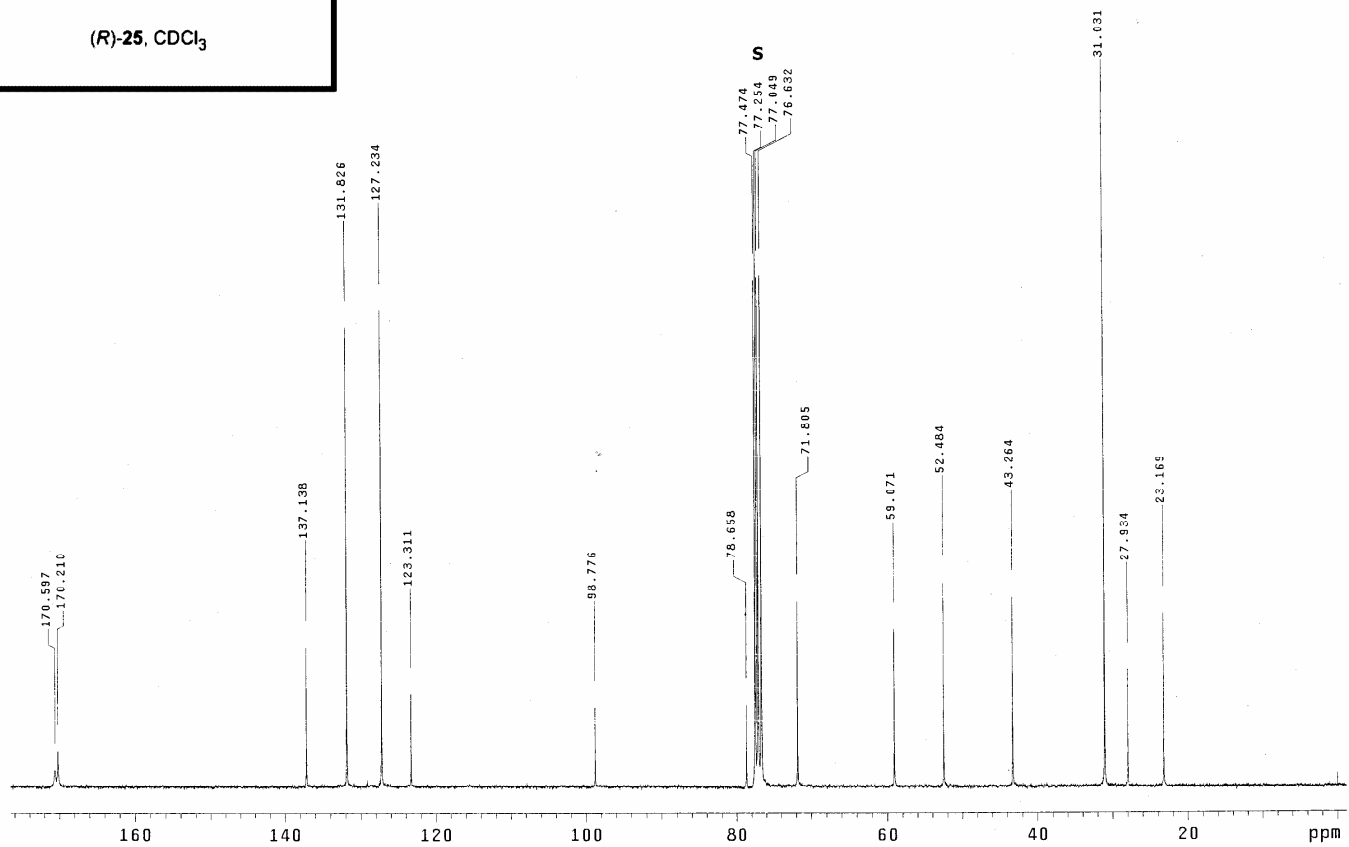

# Supporting Information

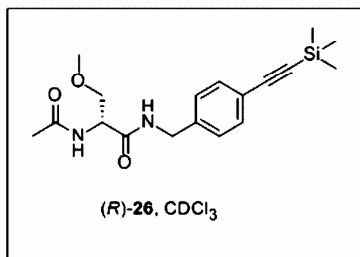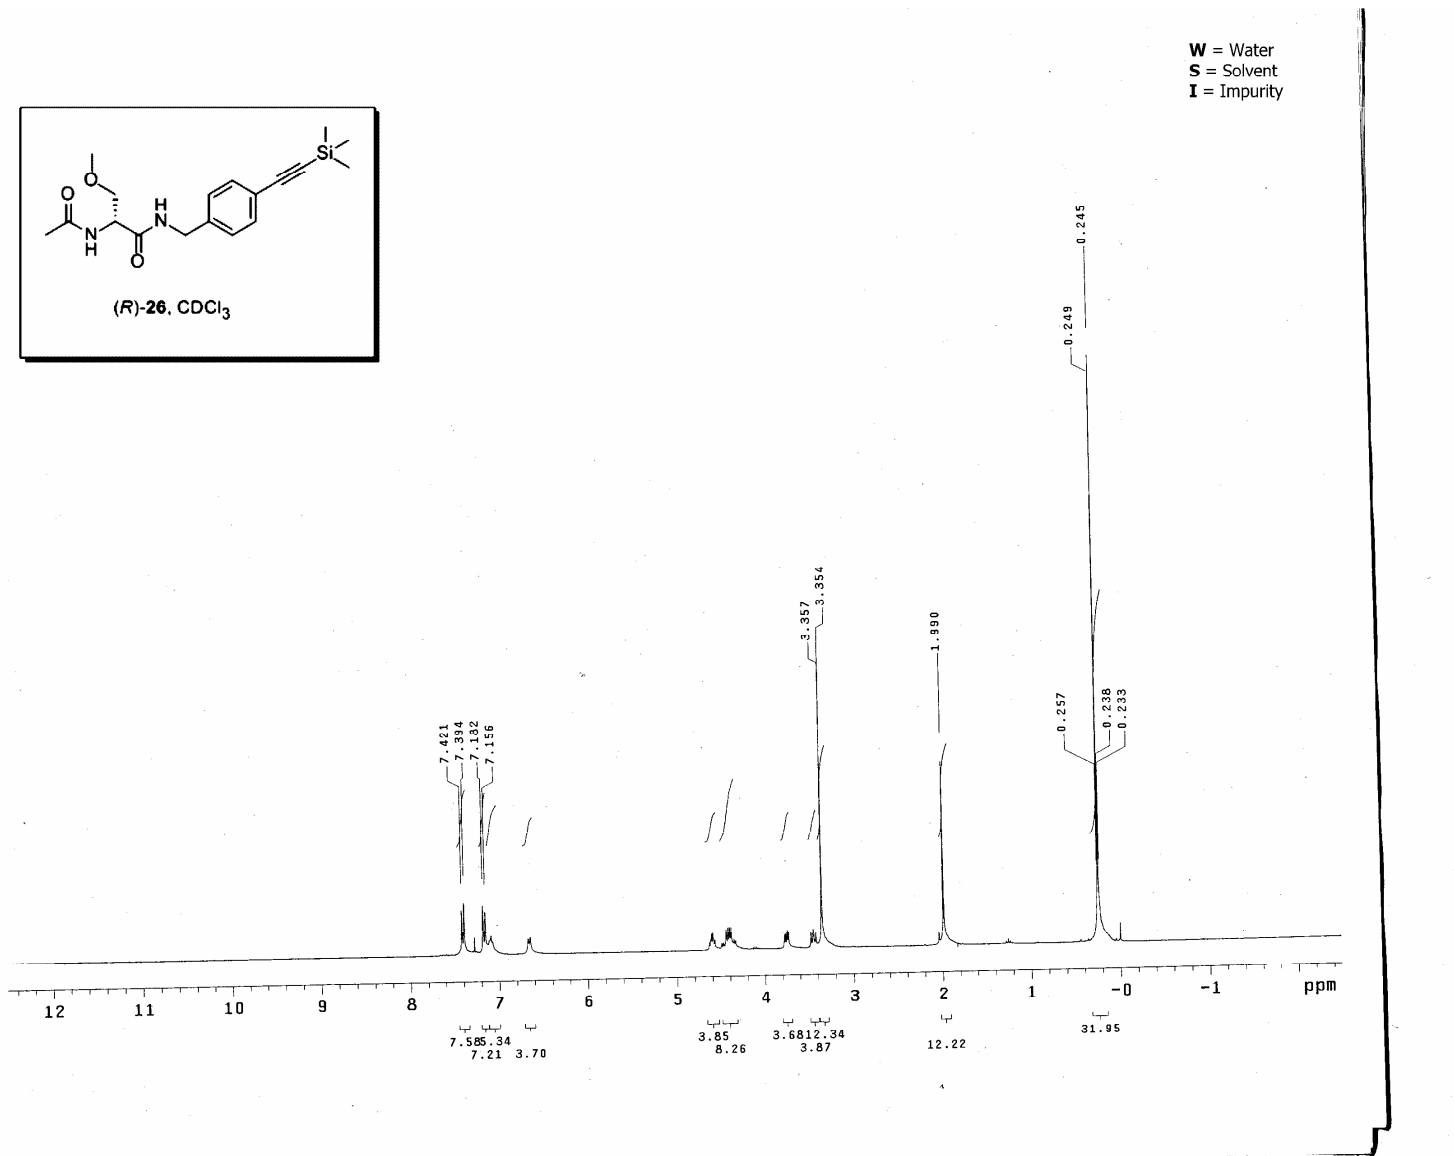

# Supporting Information

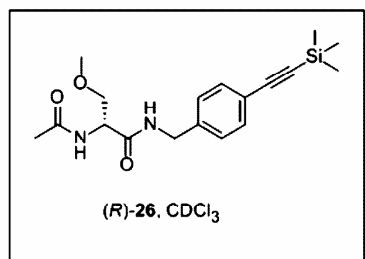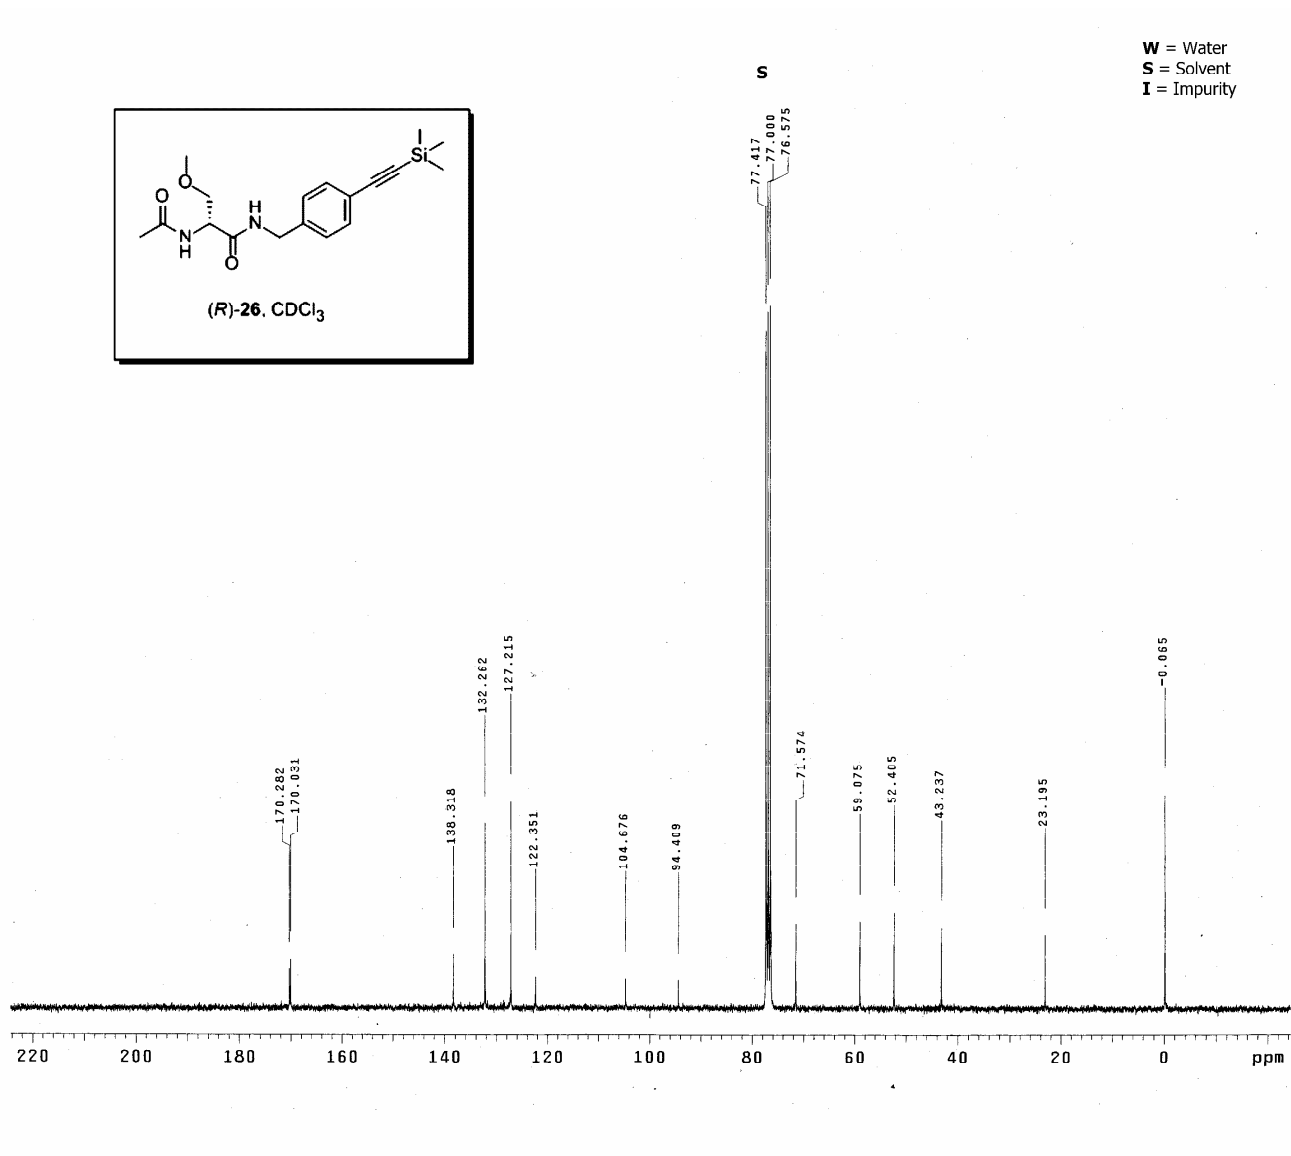

# Supporting Information

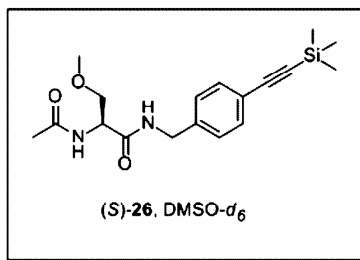

W = Water  
S = Solvent  
I = Impurity

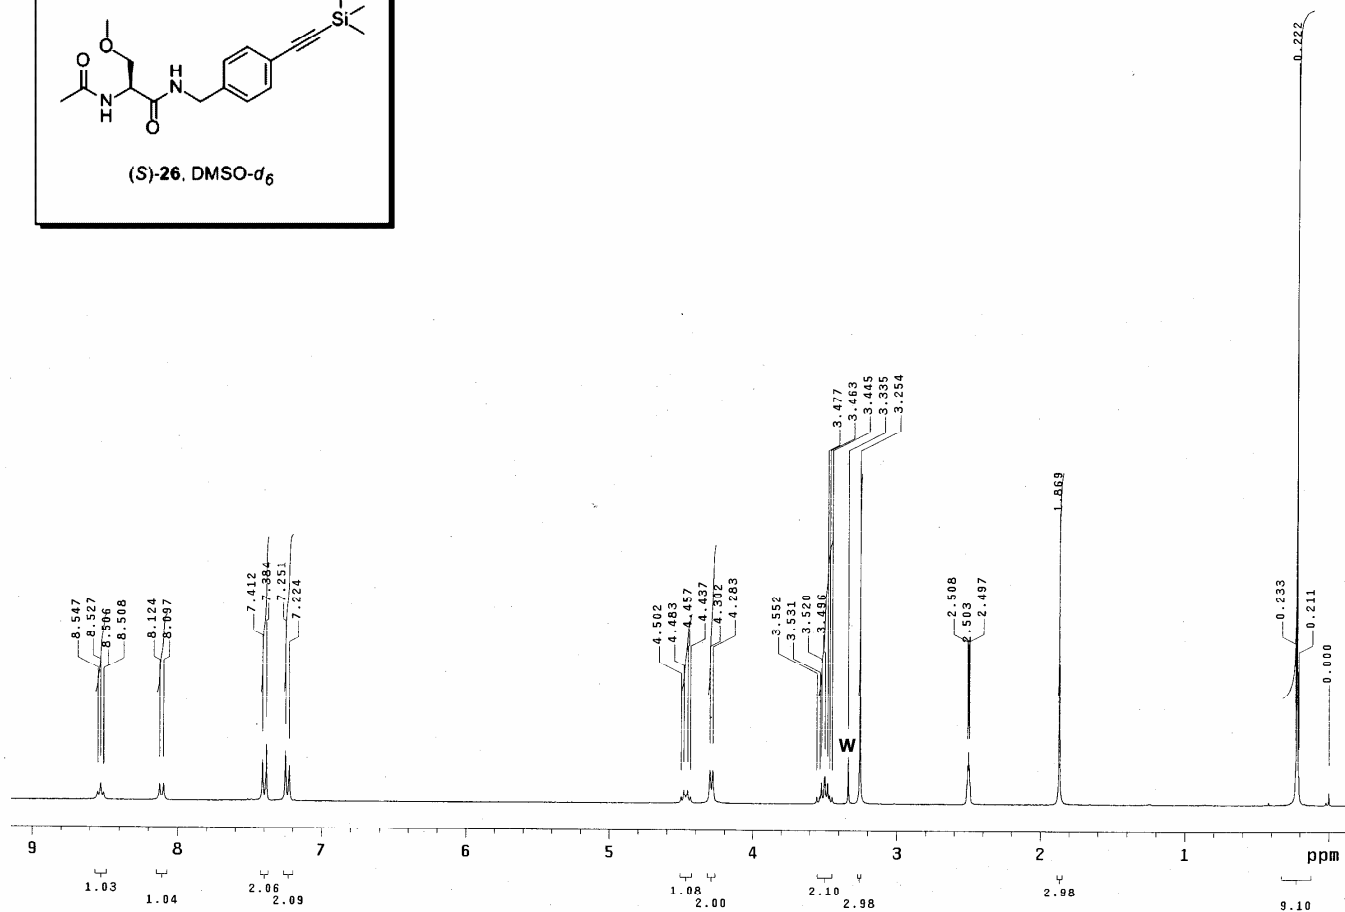

# Supporting Information

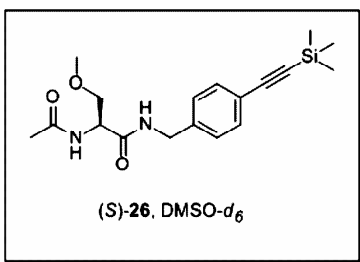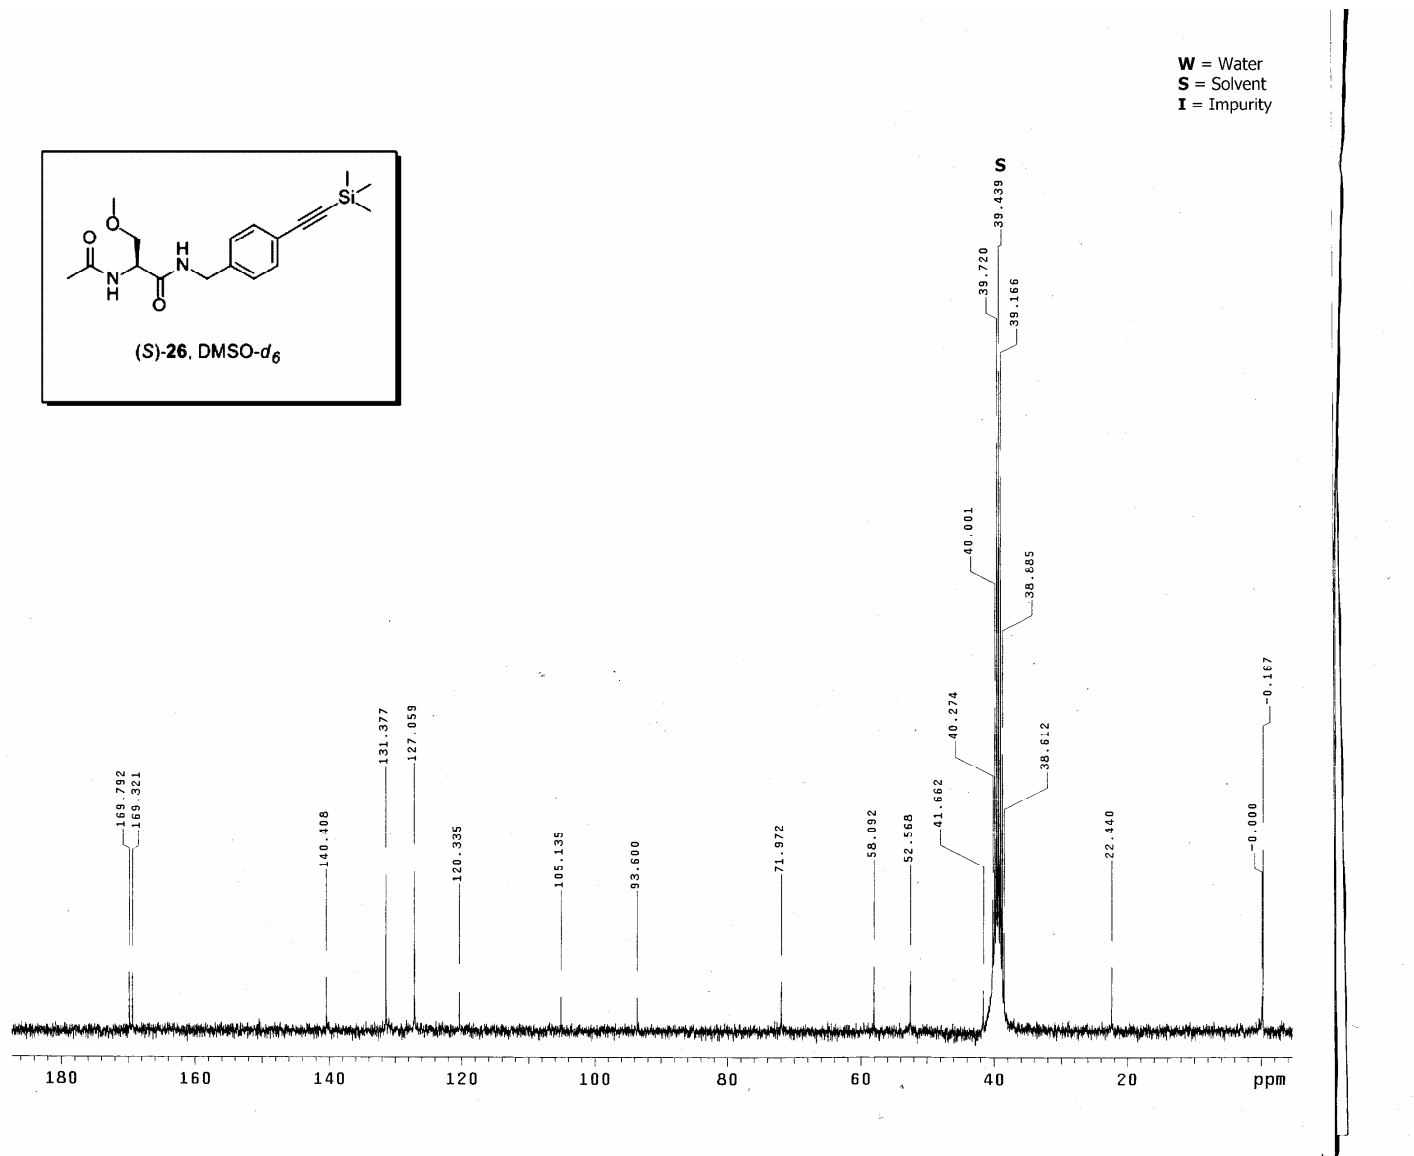

# Supporting Information

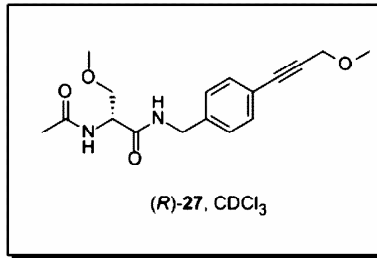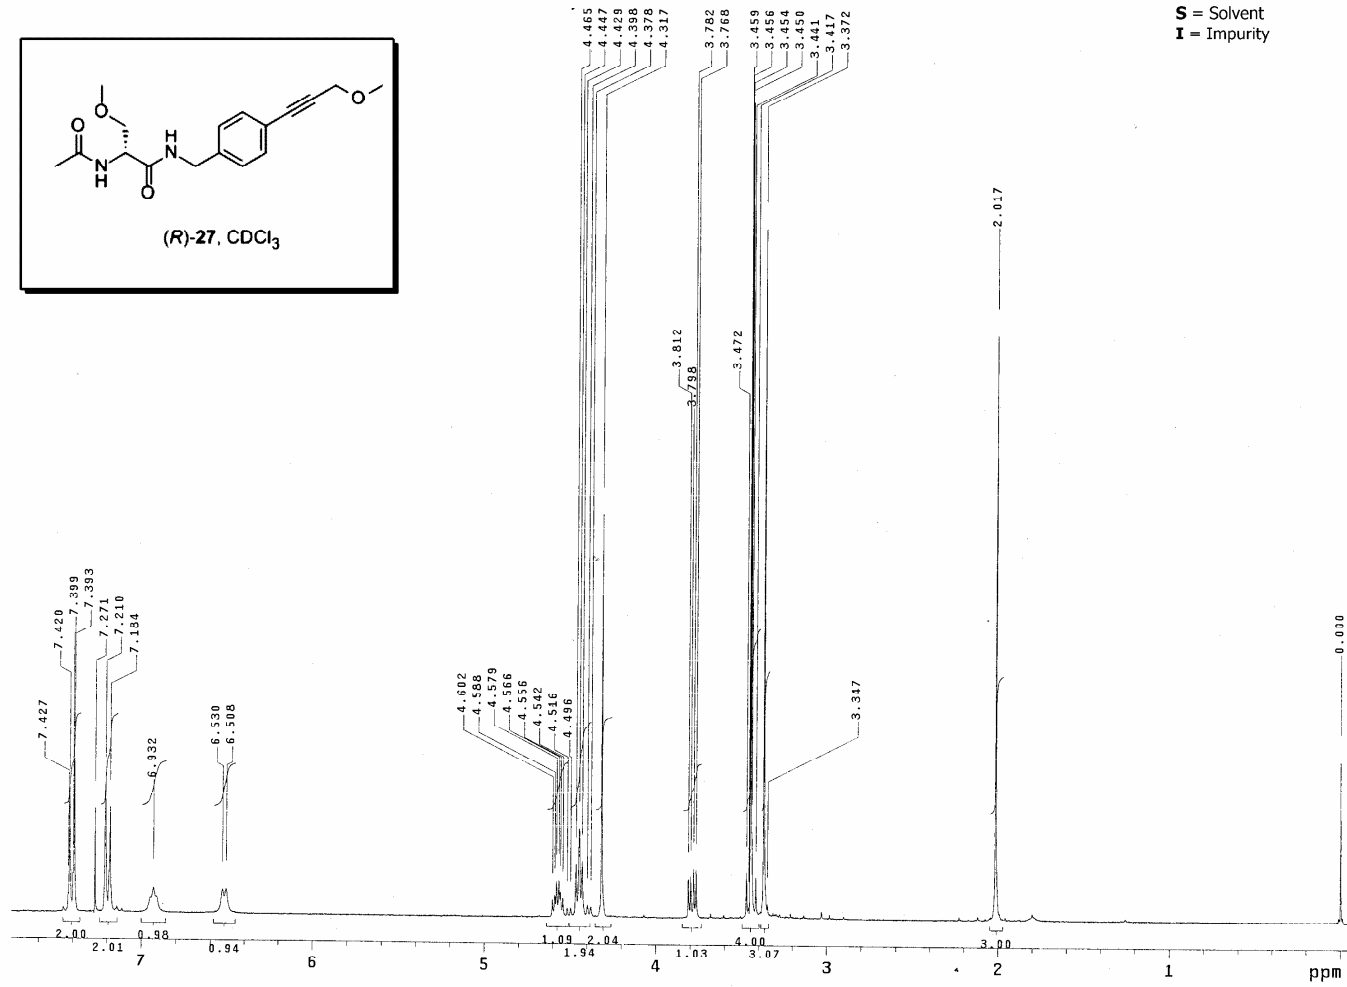



# Supporting Information

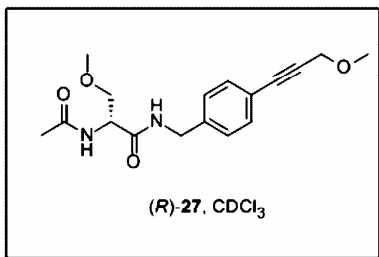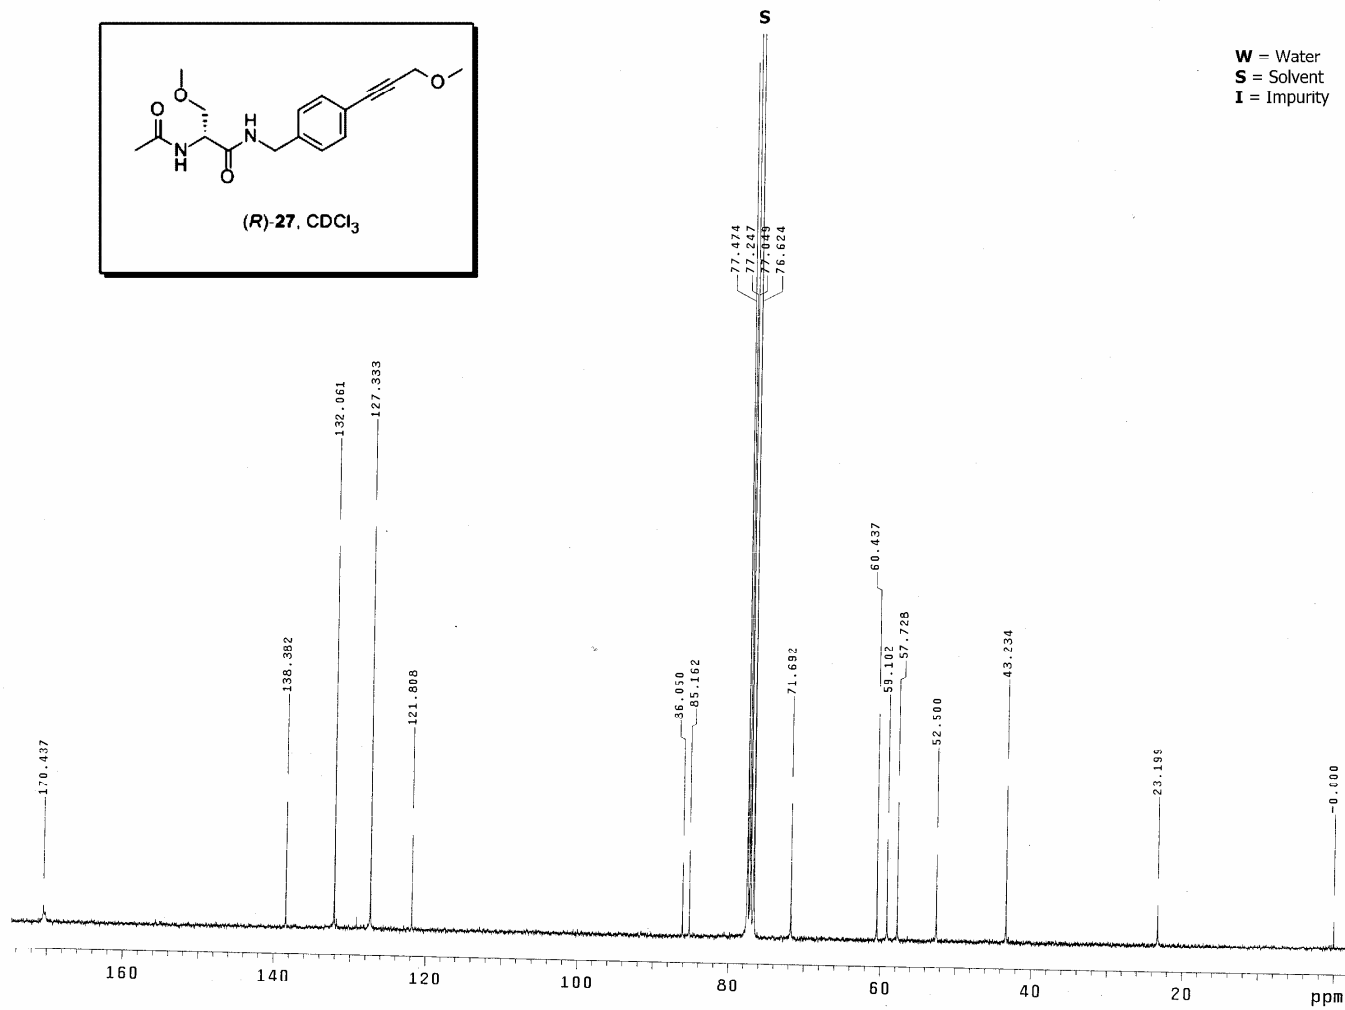

# Supporting Information

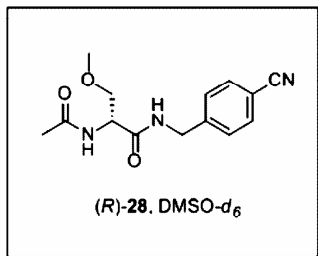

W = Water  
S = Solvent  
I = Impurity

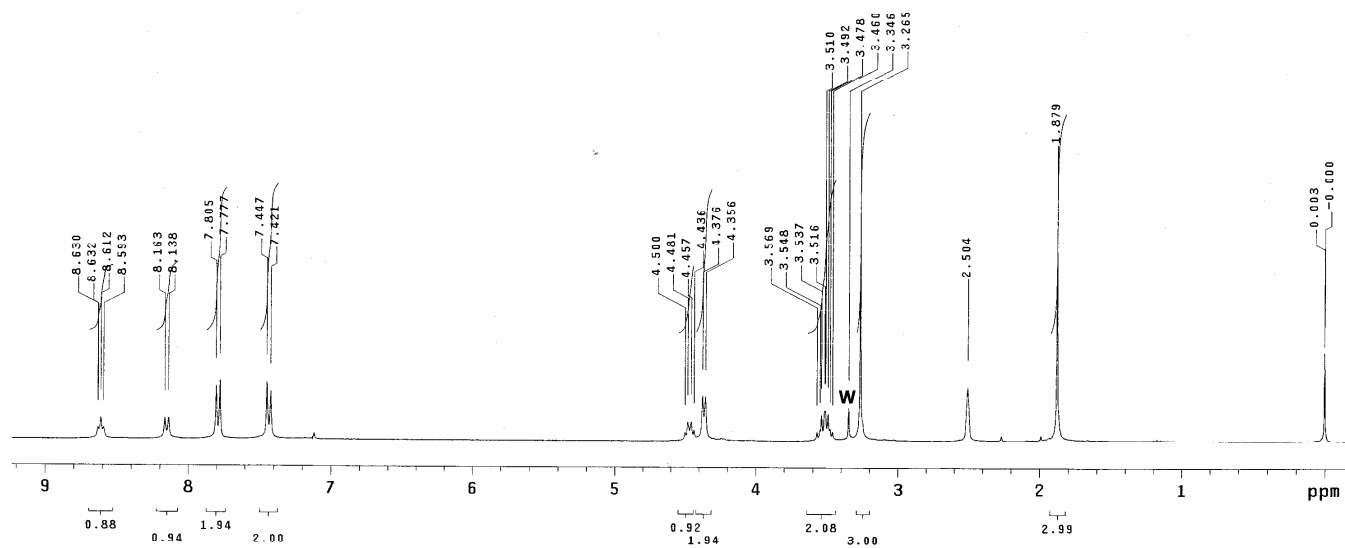

# Supporting Information

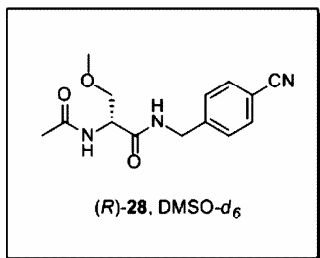

W = Water  
S = Solvent  
I = Impurity

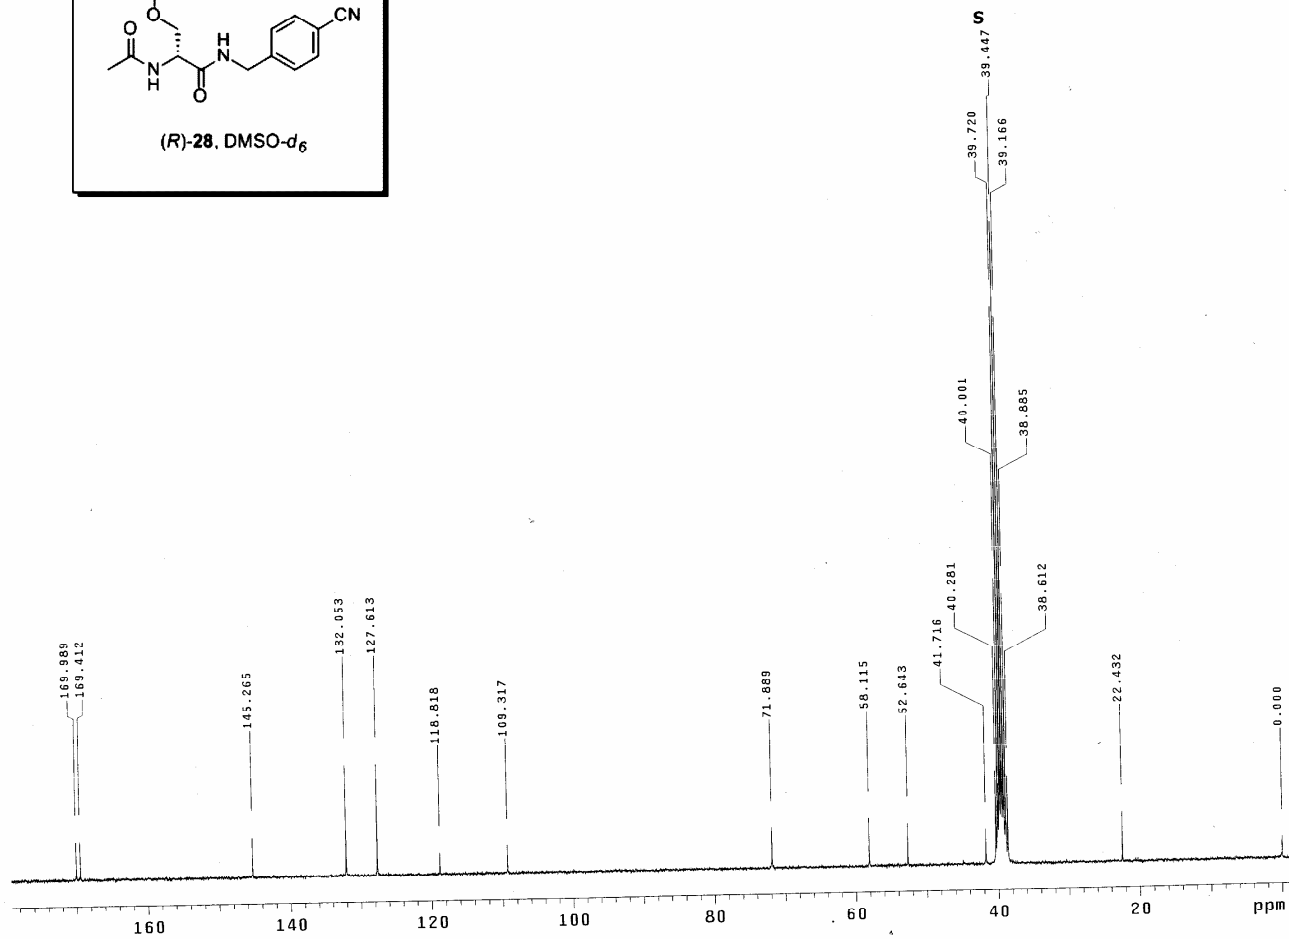

# Supporting Information

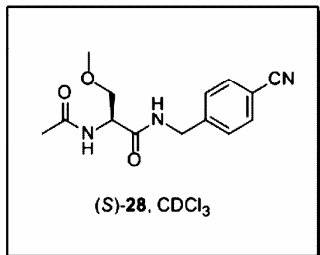

W = Water  
S = Solvent  
I = Impurity

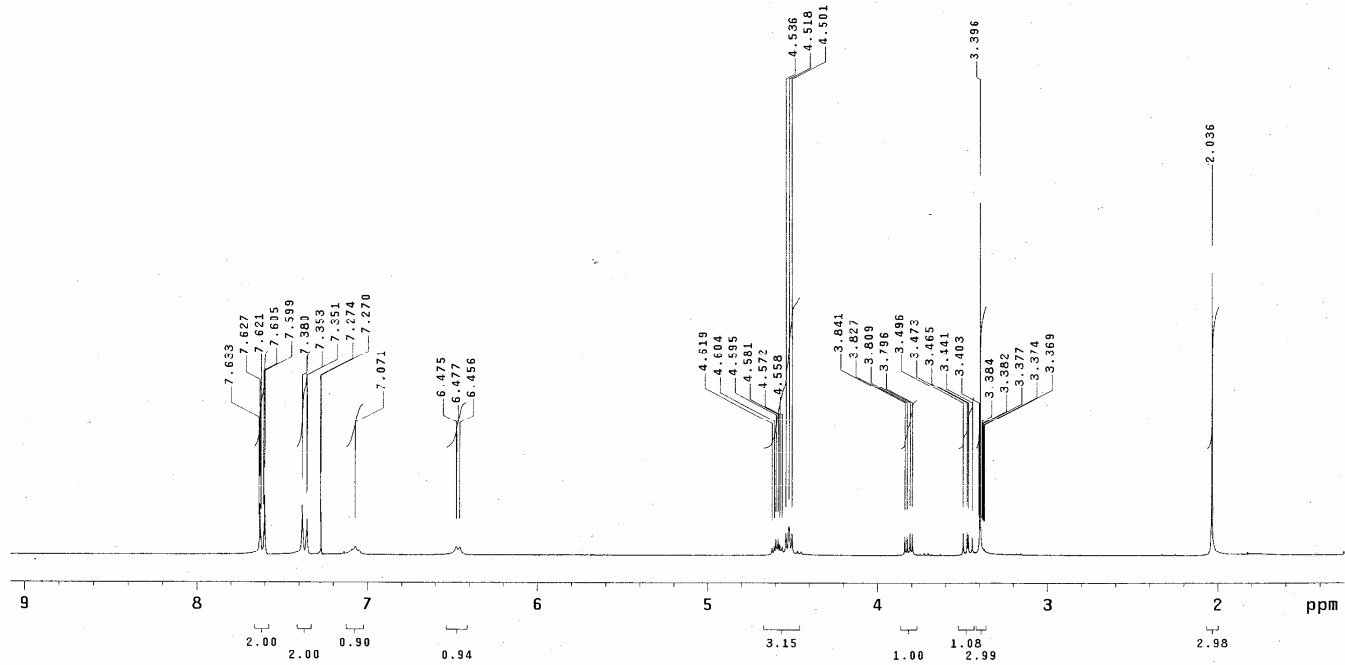

# Supporting Information

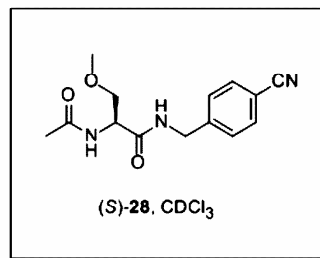

W = Water  
S = Solvent  
I = Impurity

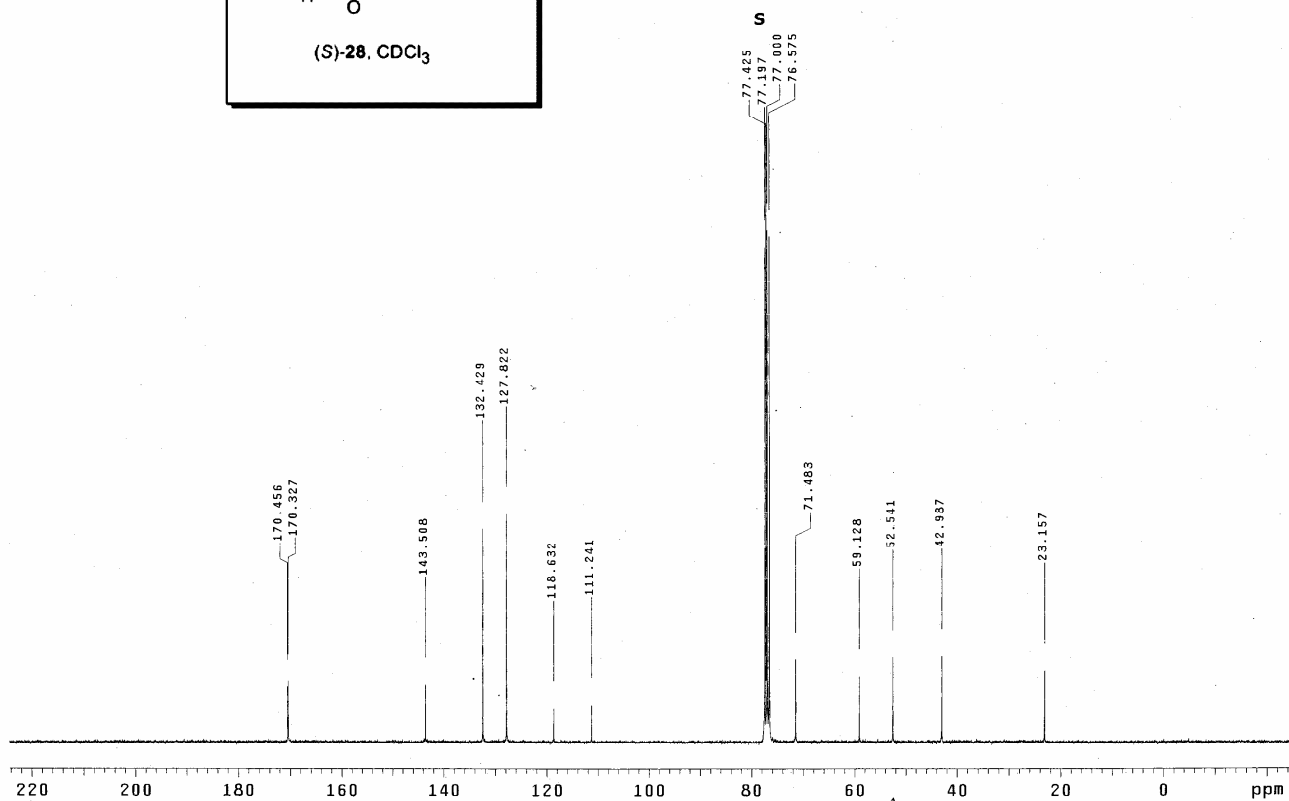

# Supporting Information

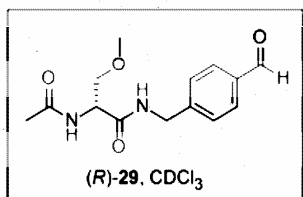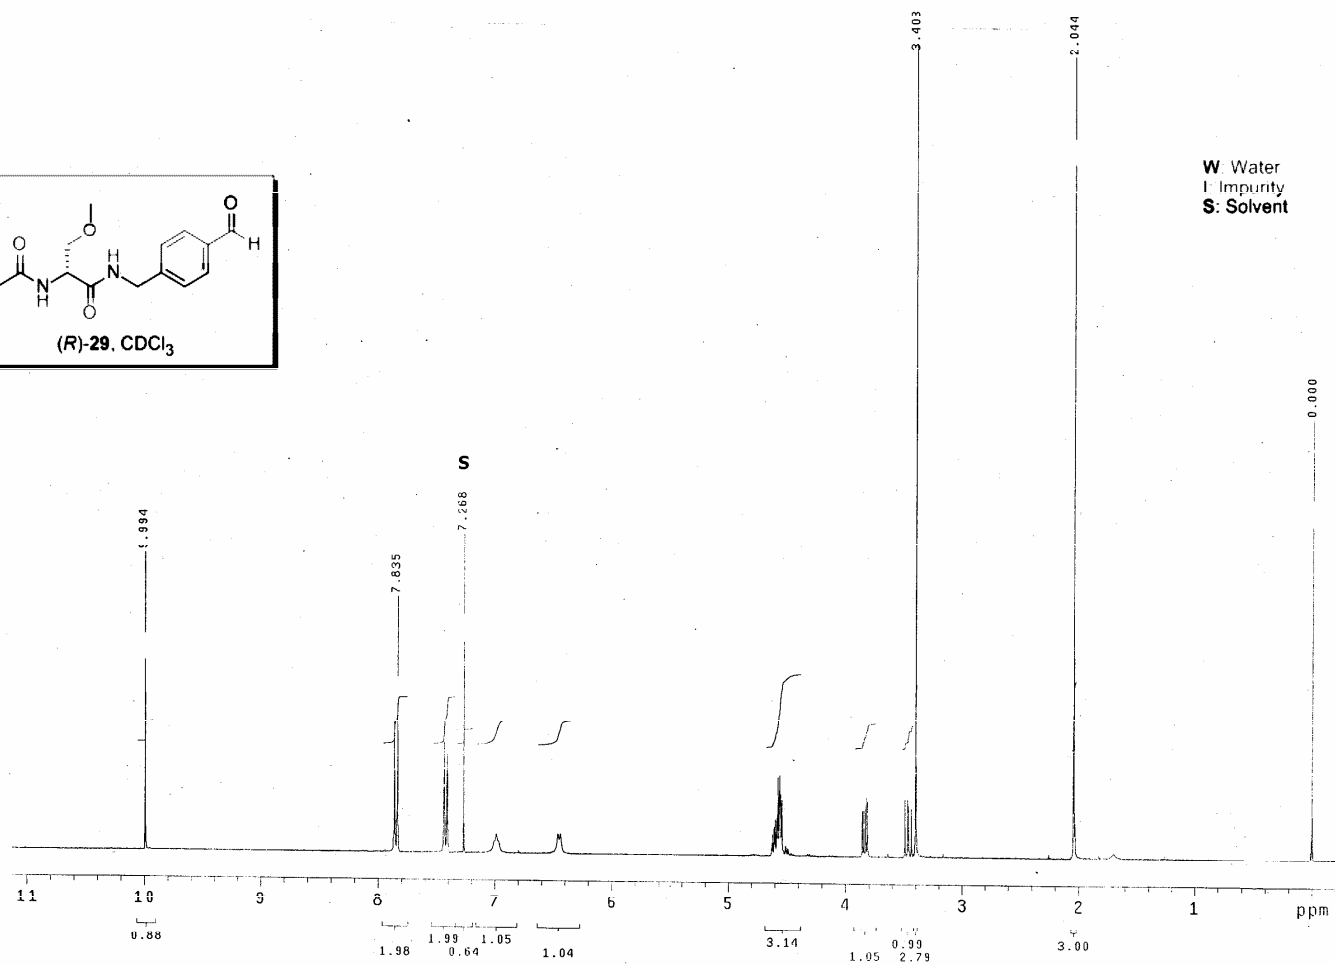

# Supporting Information

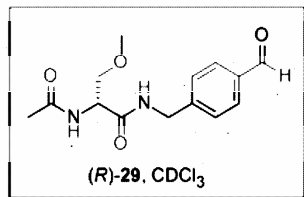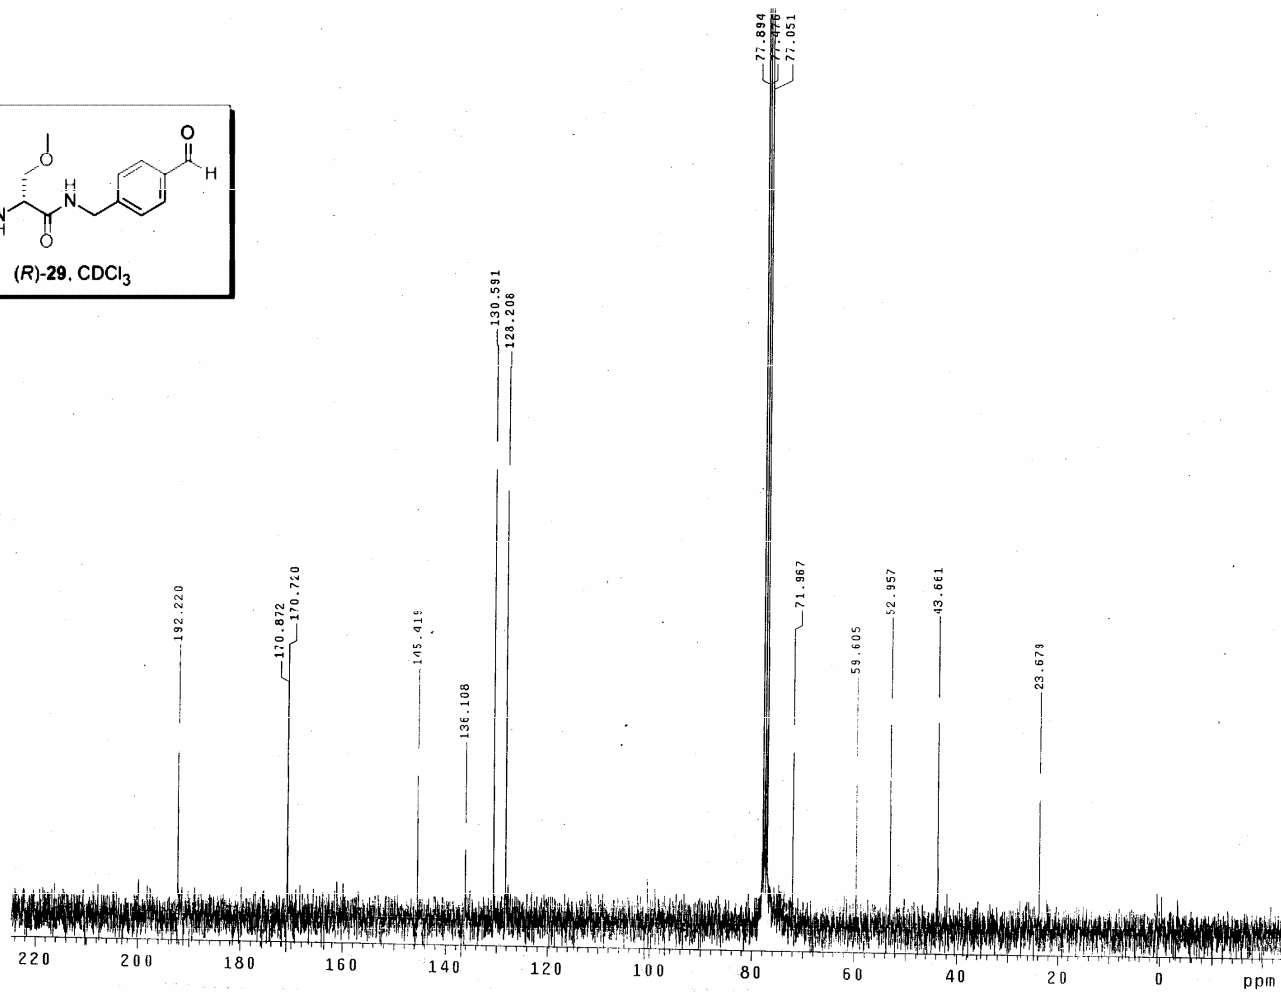

# Supporting Information

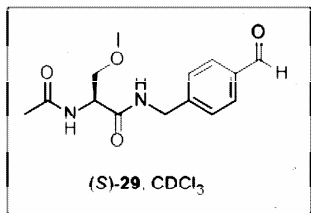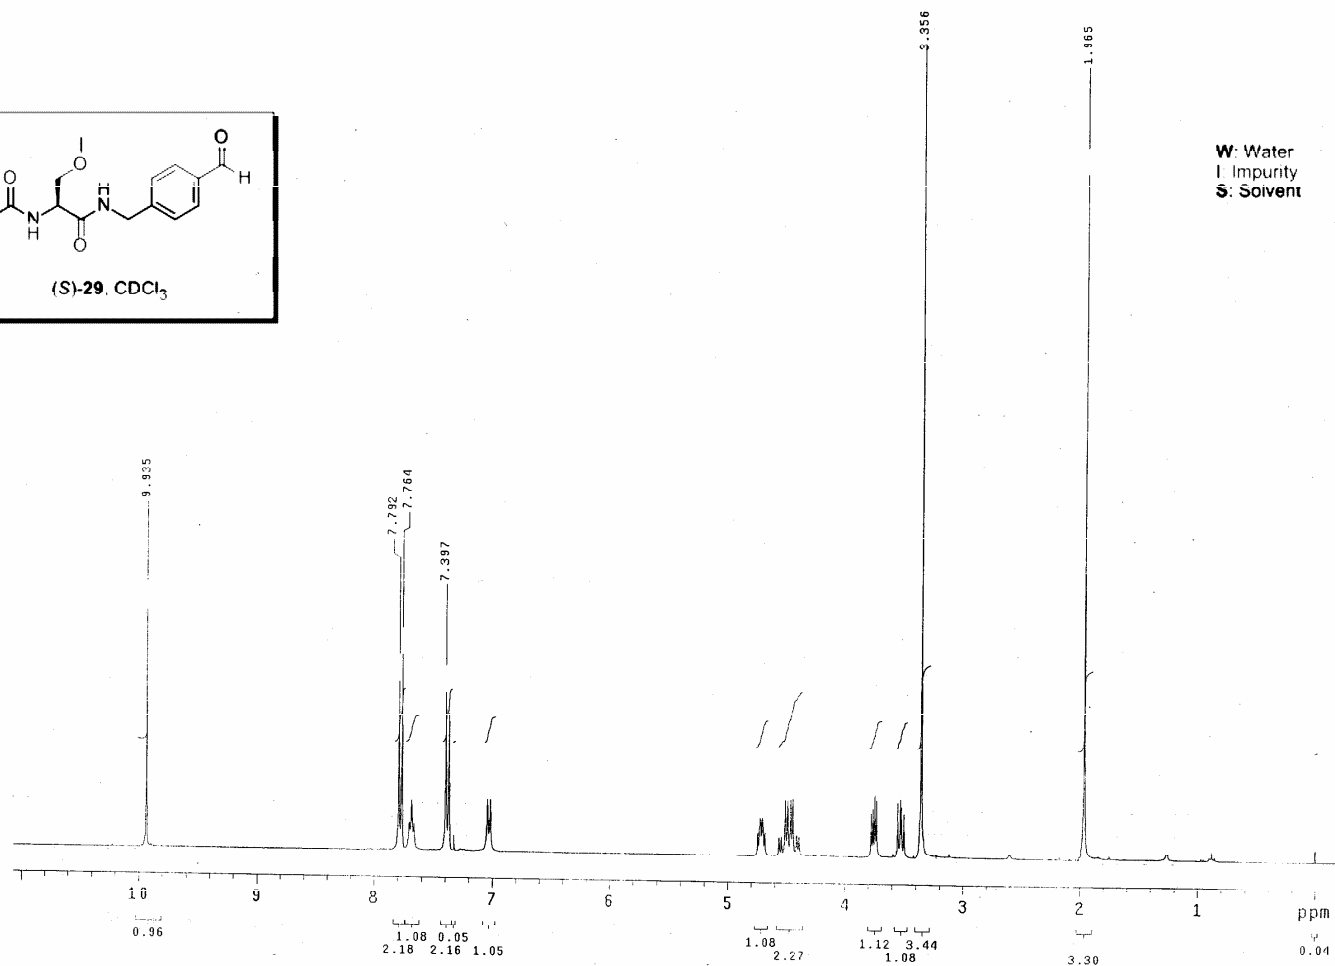



# Supporting Information

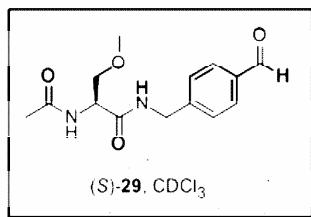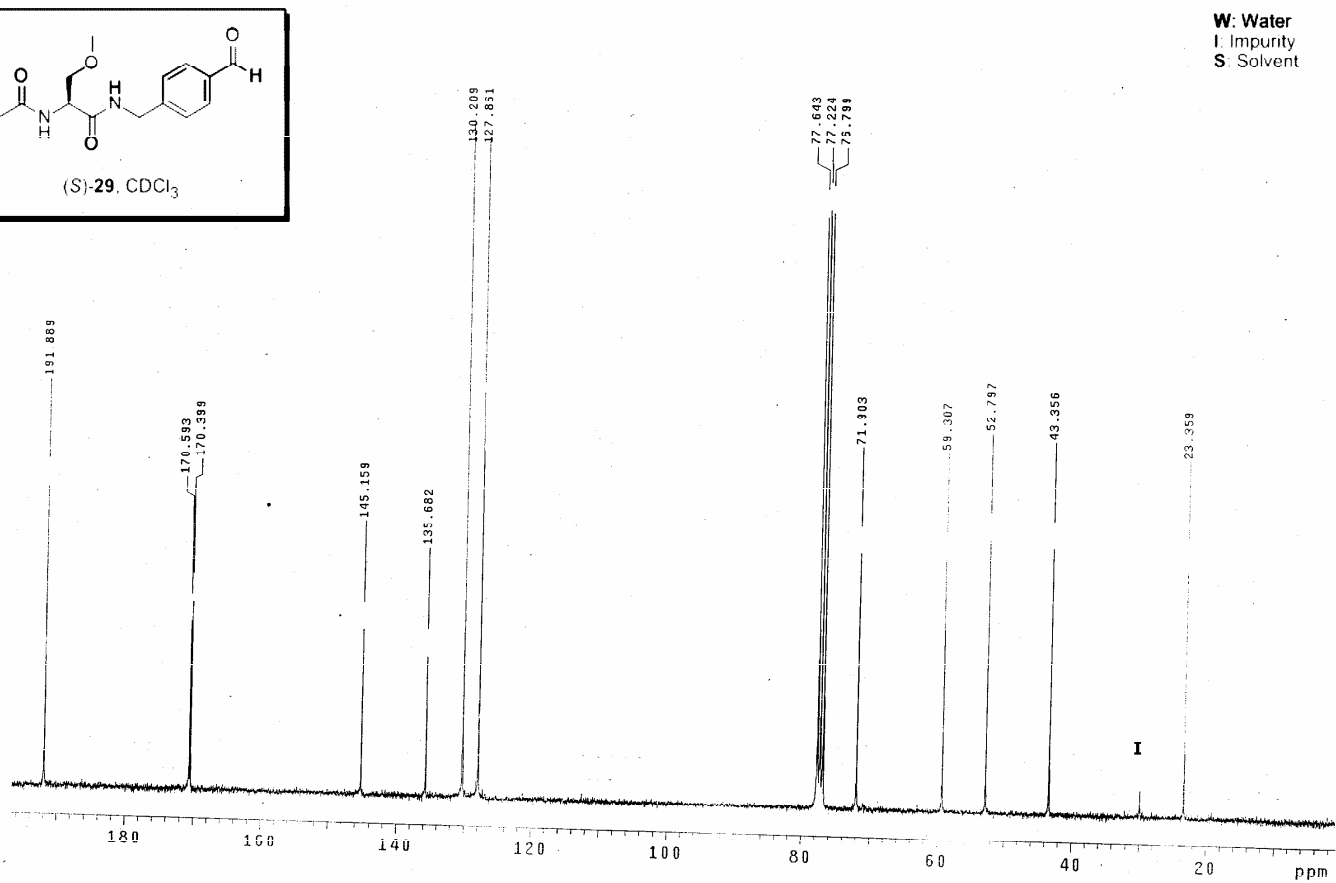

# Supporting Information

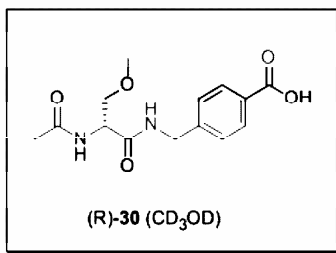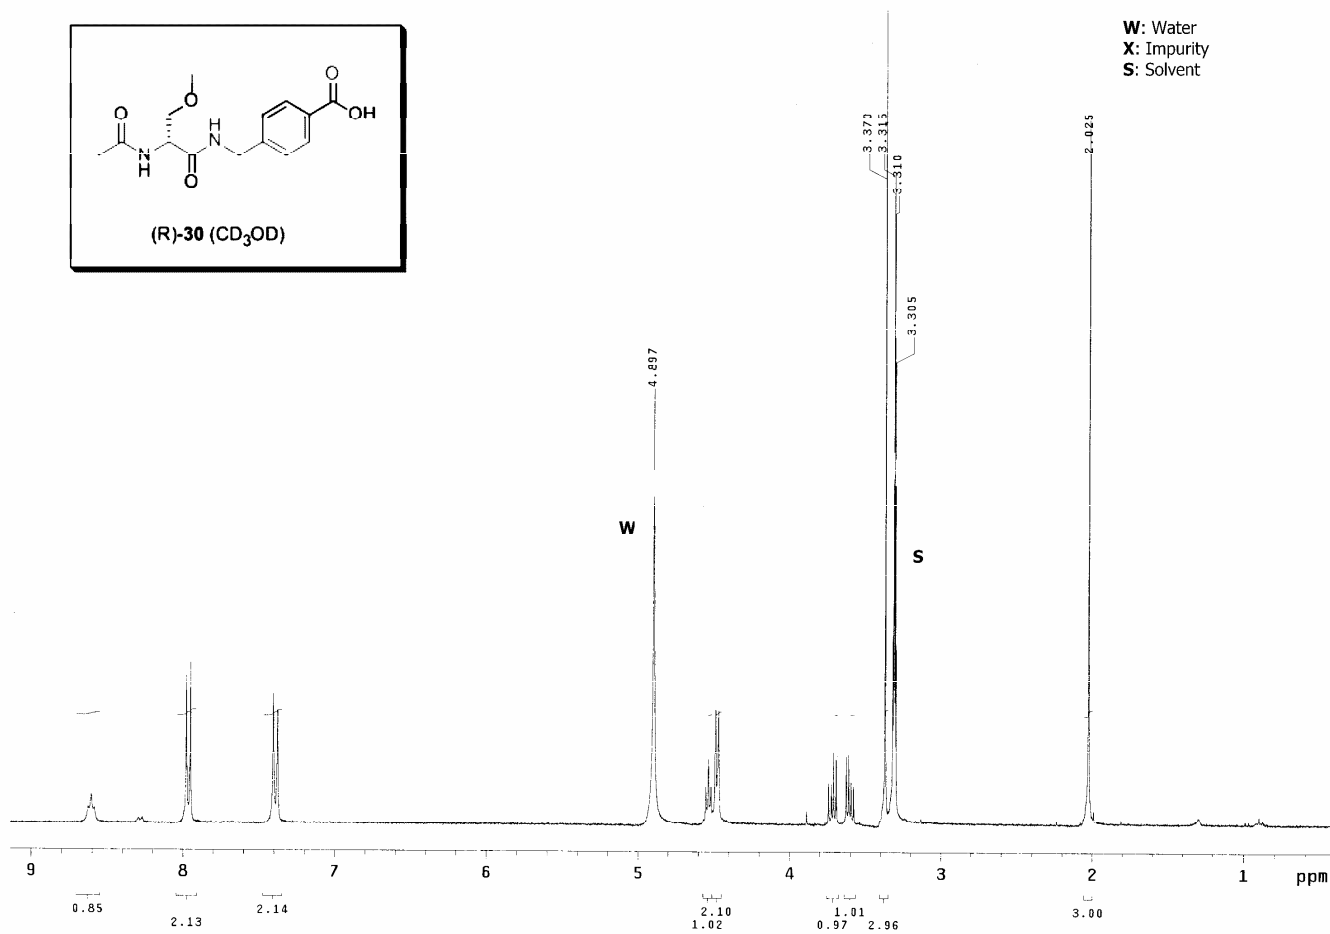

# Supporting Information

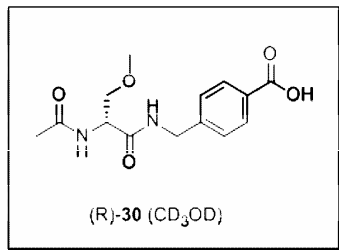

W: Water  
X: Impurity  
S: Solvent

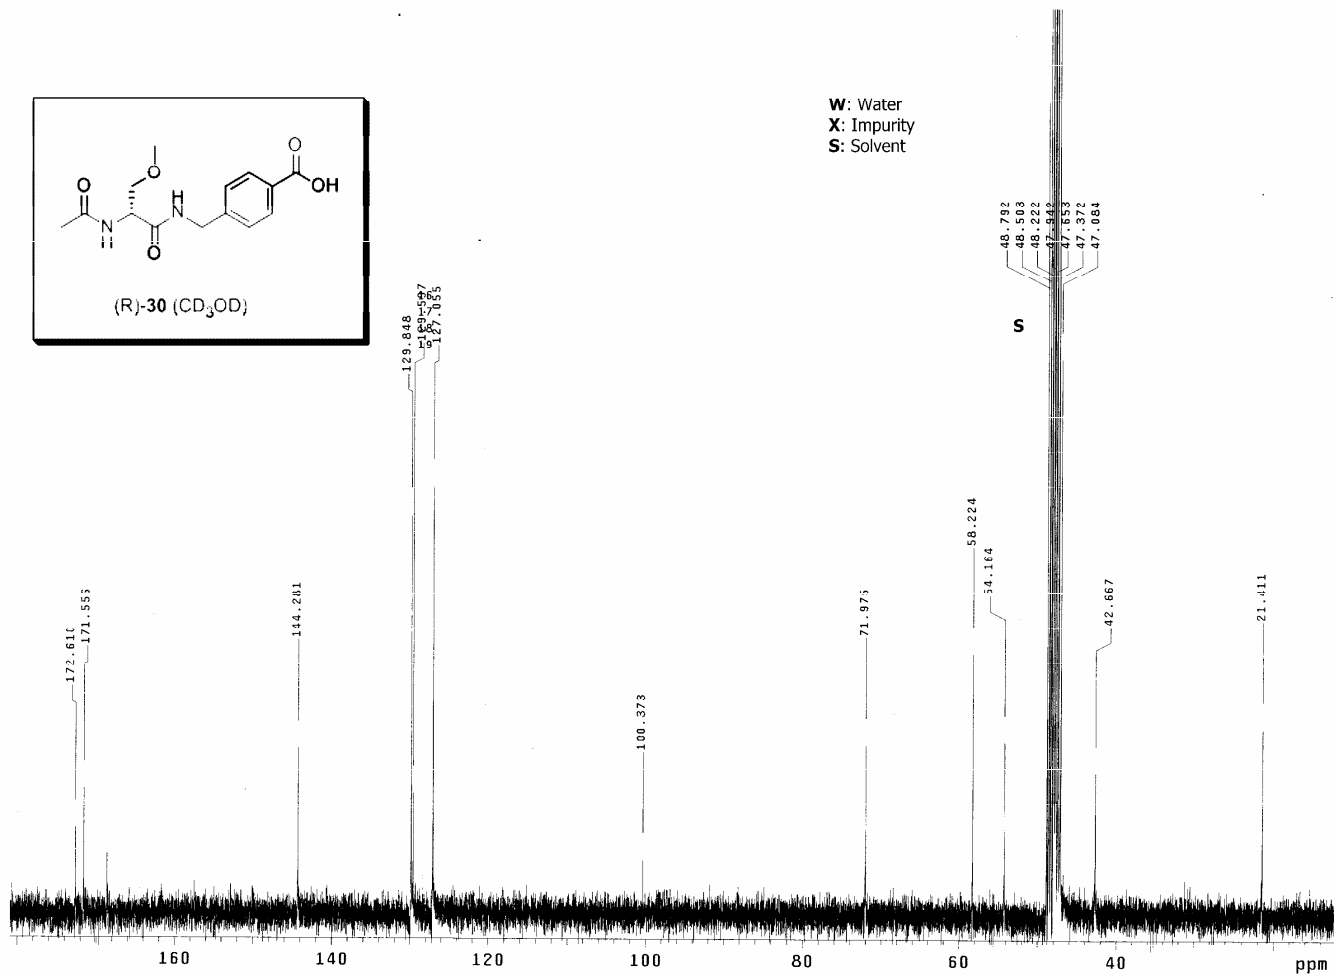

# Supporting Information

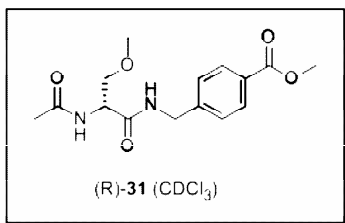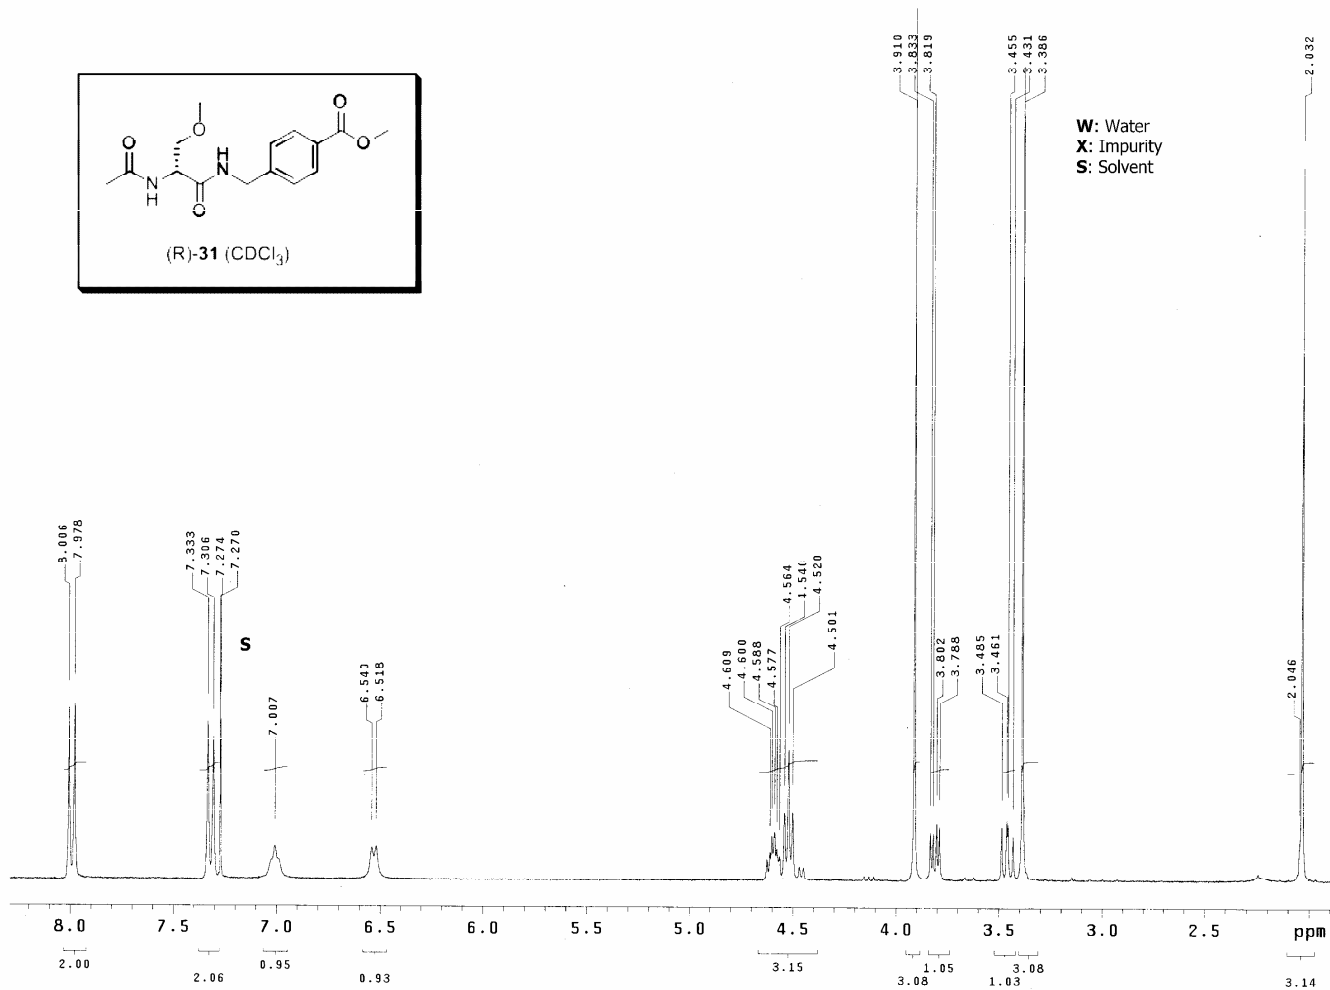

# Supporting Information

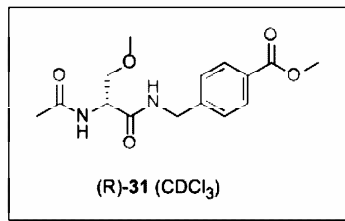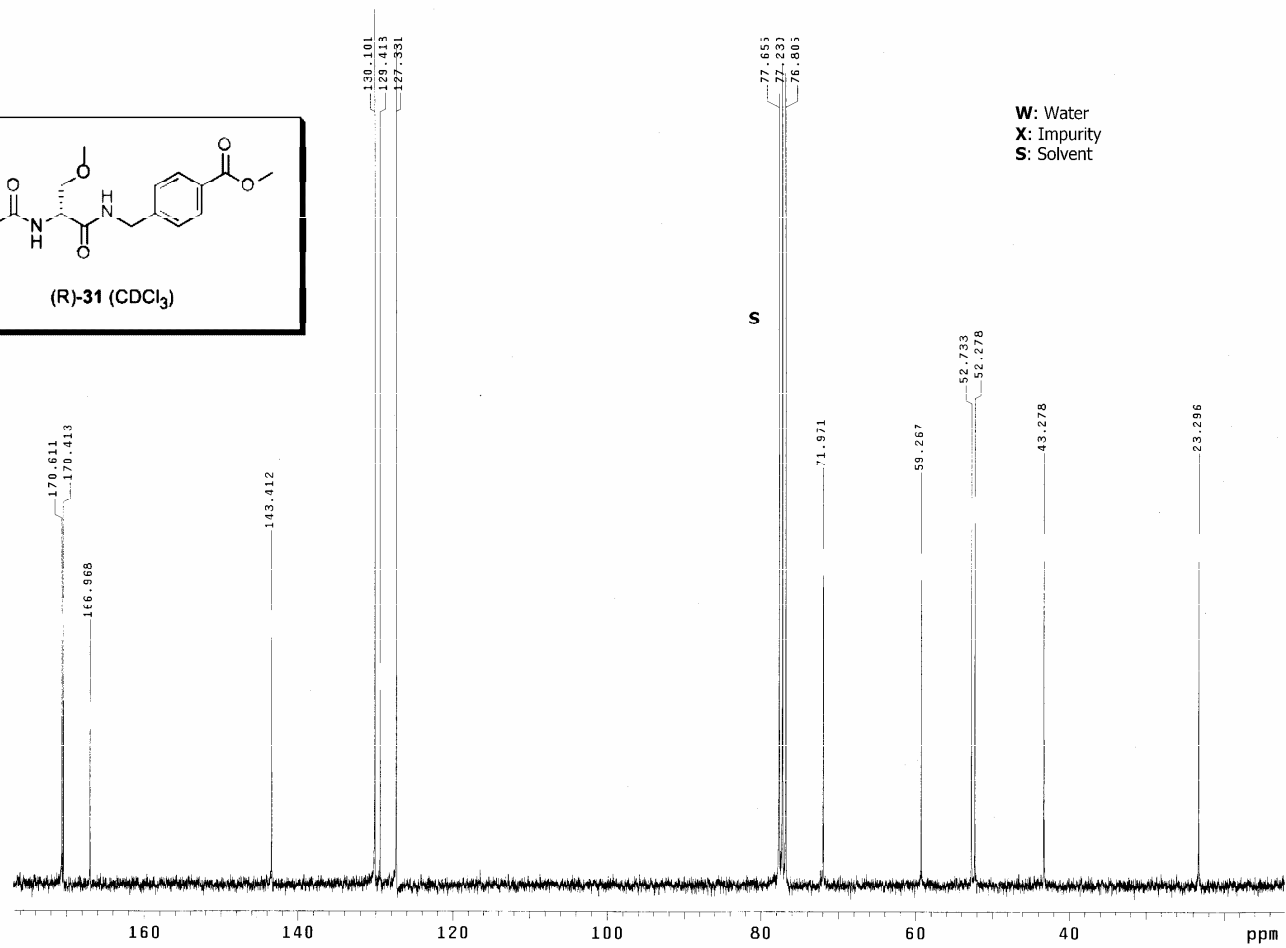

# Supporting Information

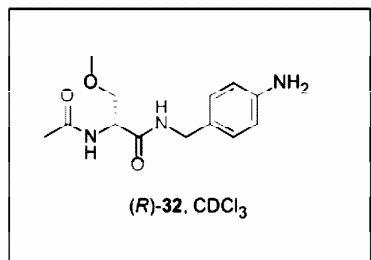

W = Water  
S = Solvent  
I = Impurity

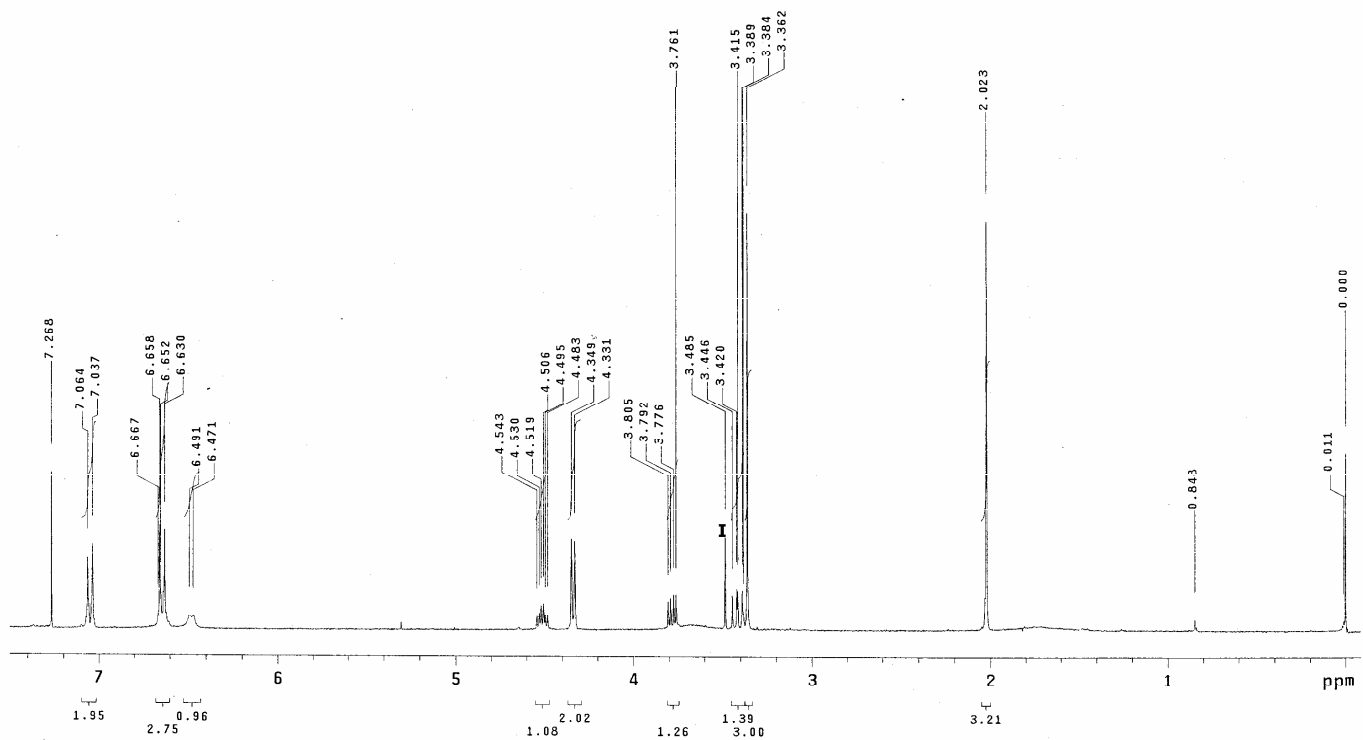

# Supporting Information

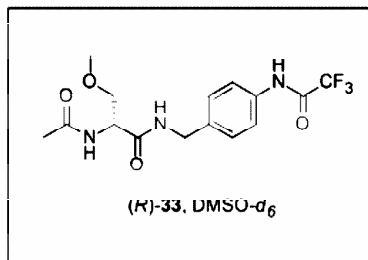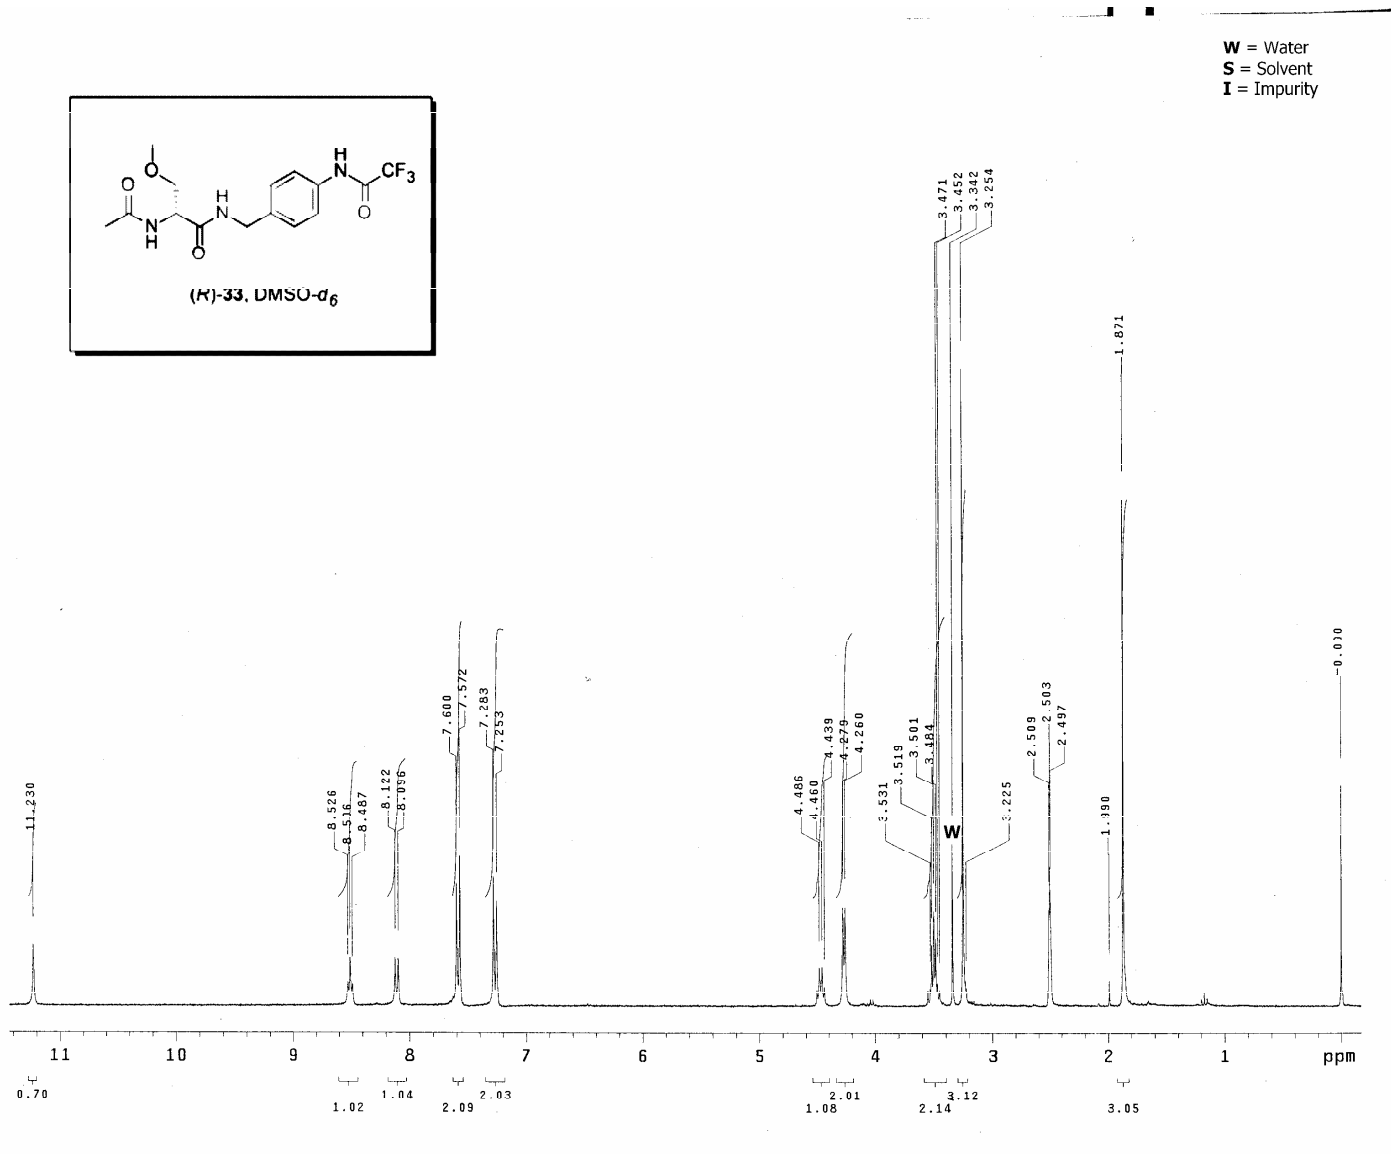

# Supporting Information

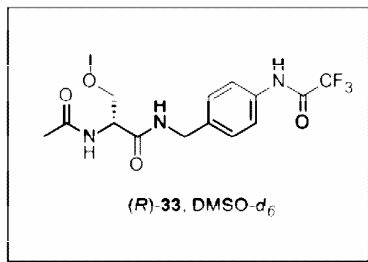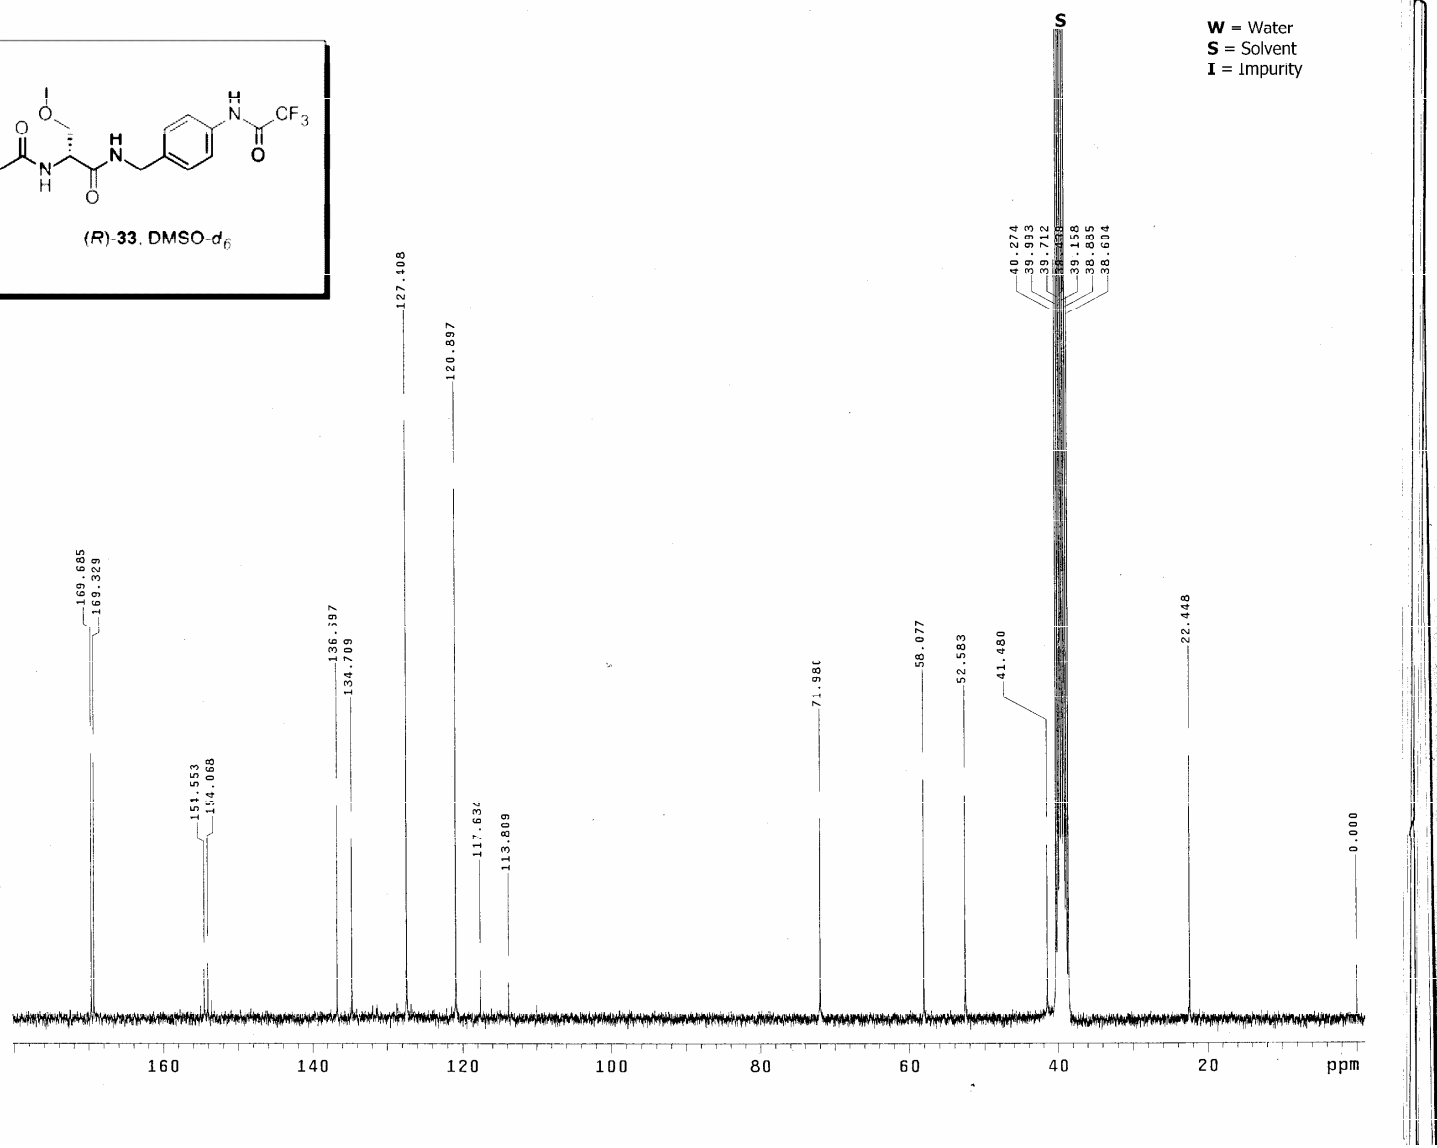



# Supporting Information

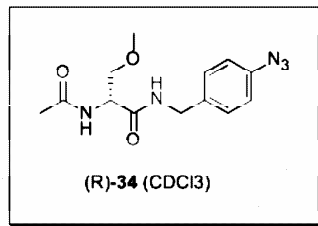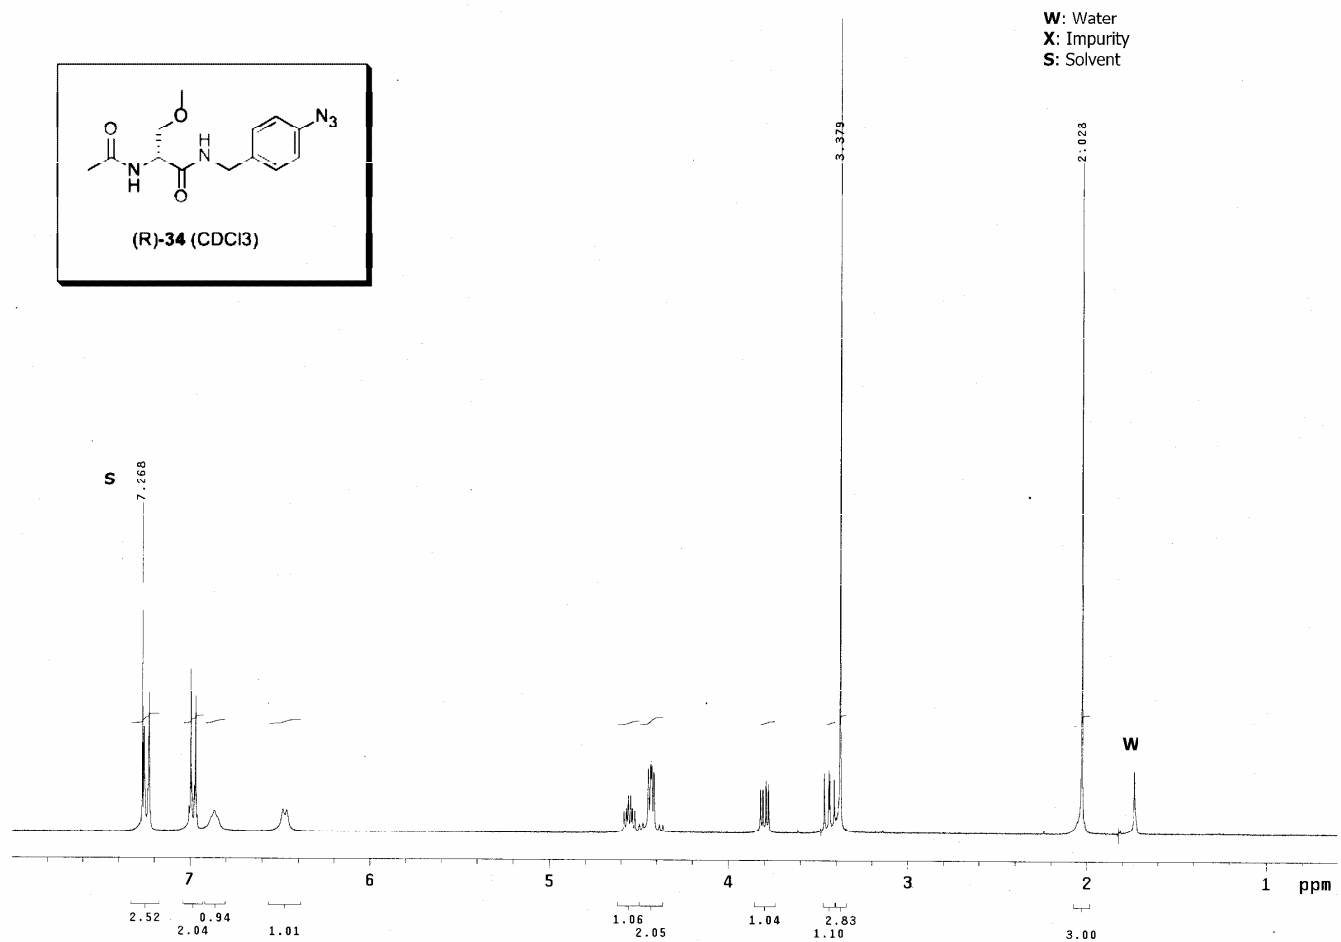

# Supporting Information

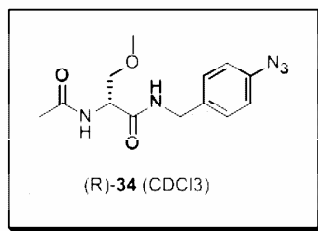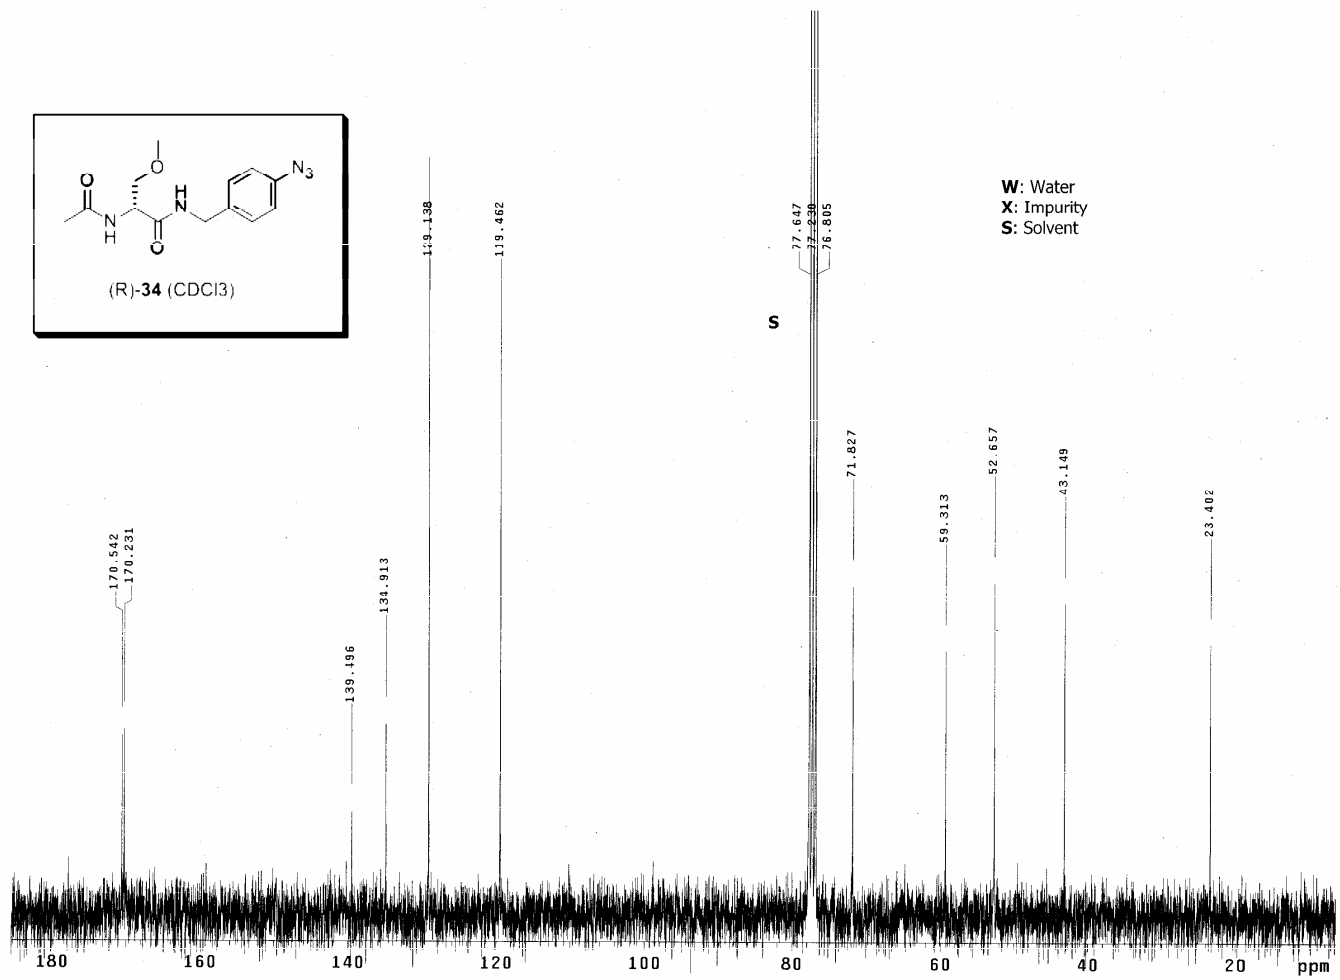

# Supporting Information

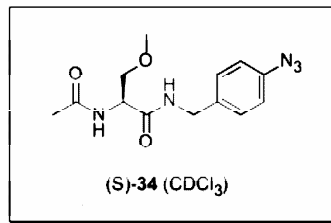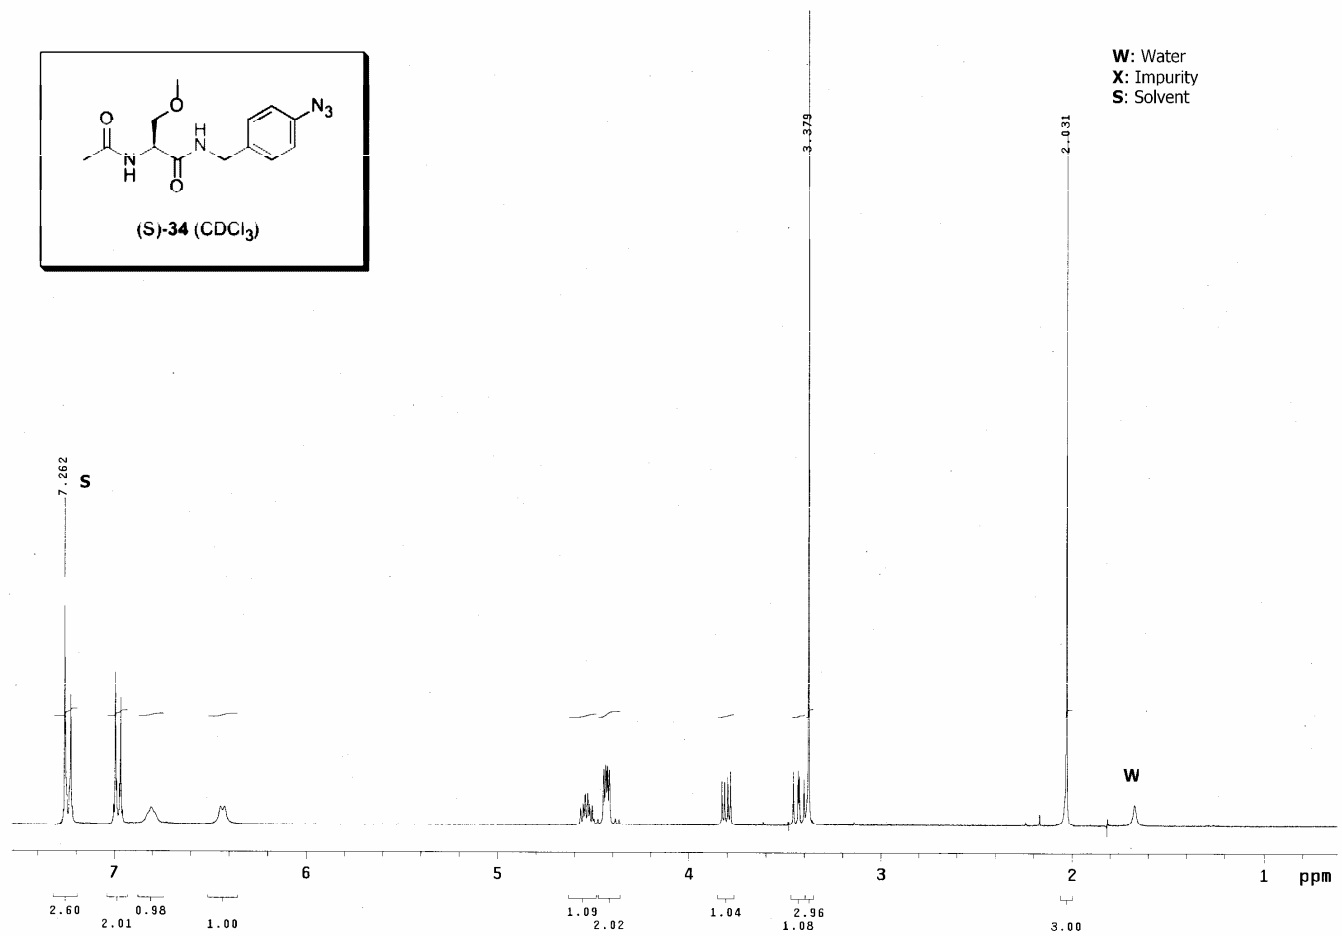

# Supporting Information

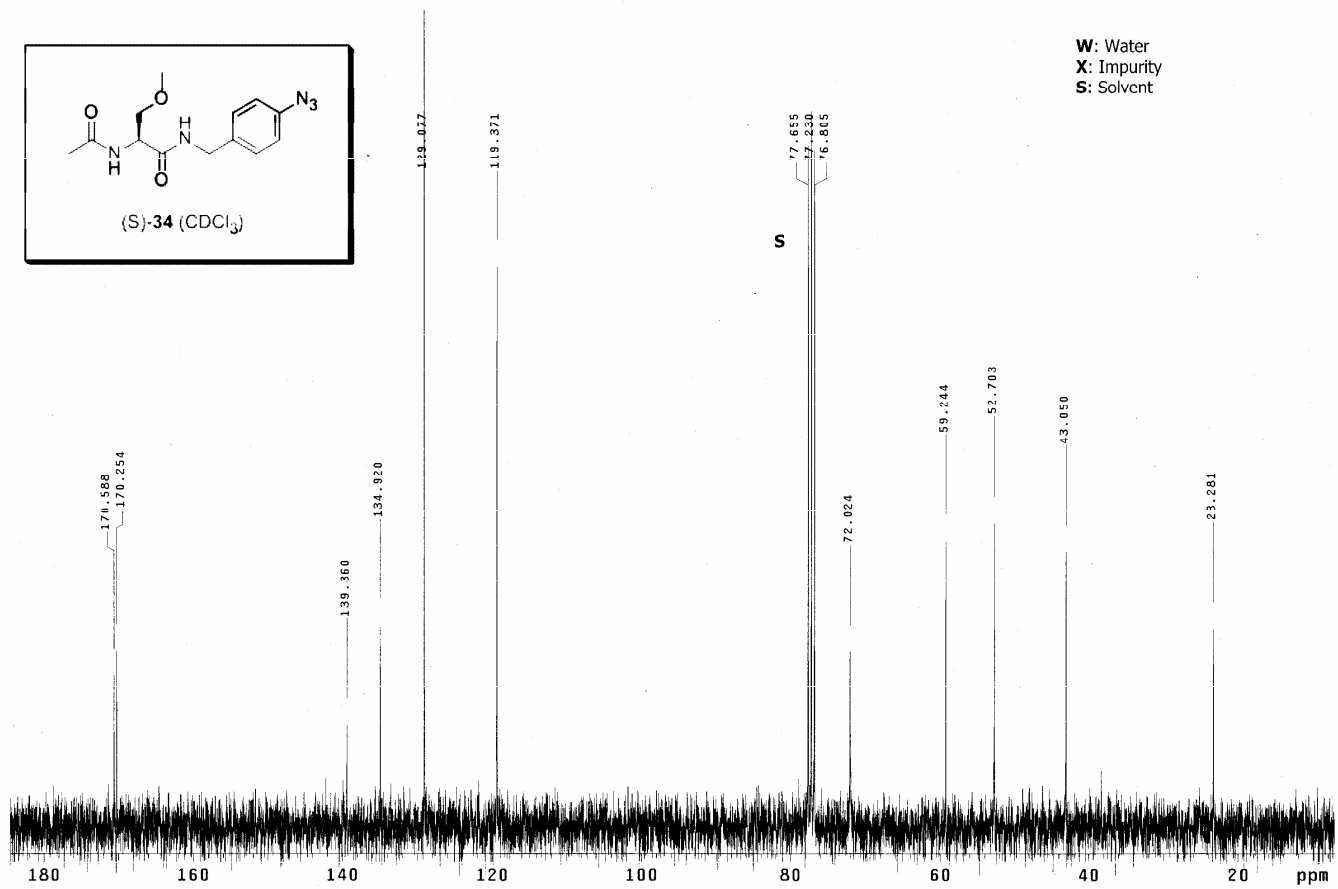

# Supporting Information

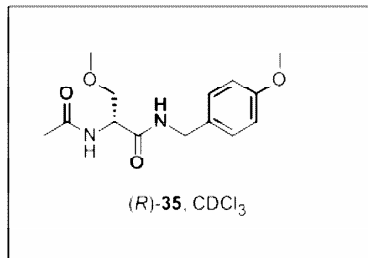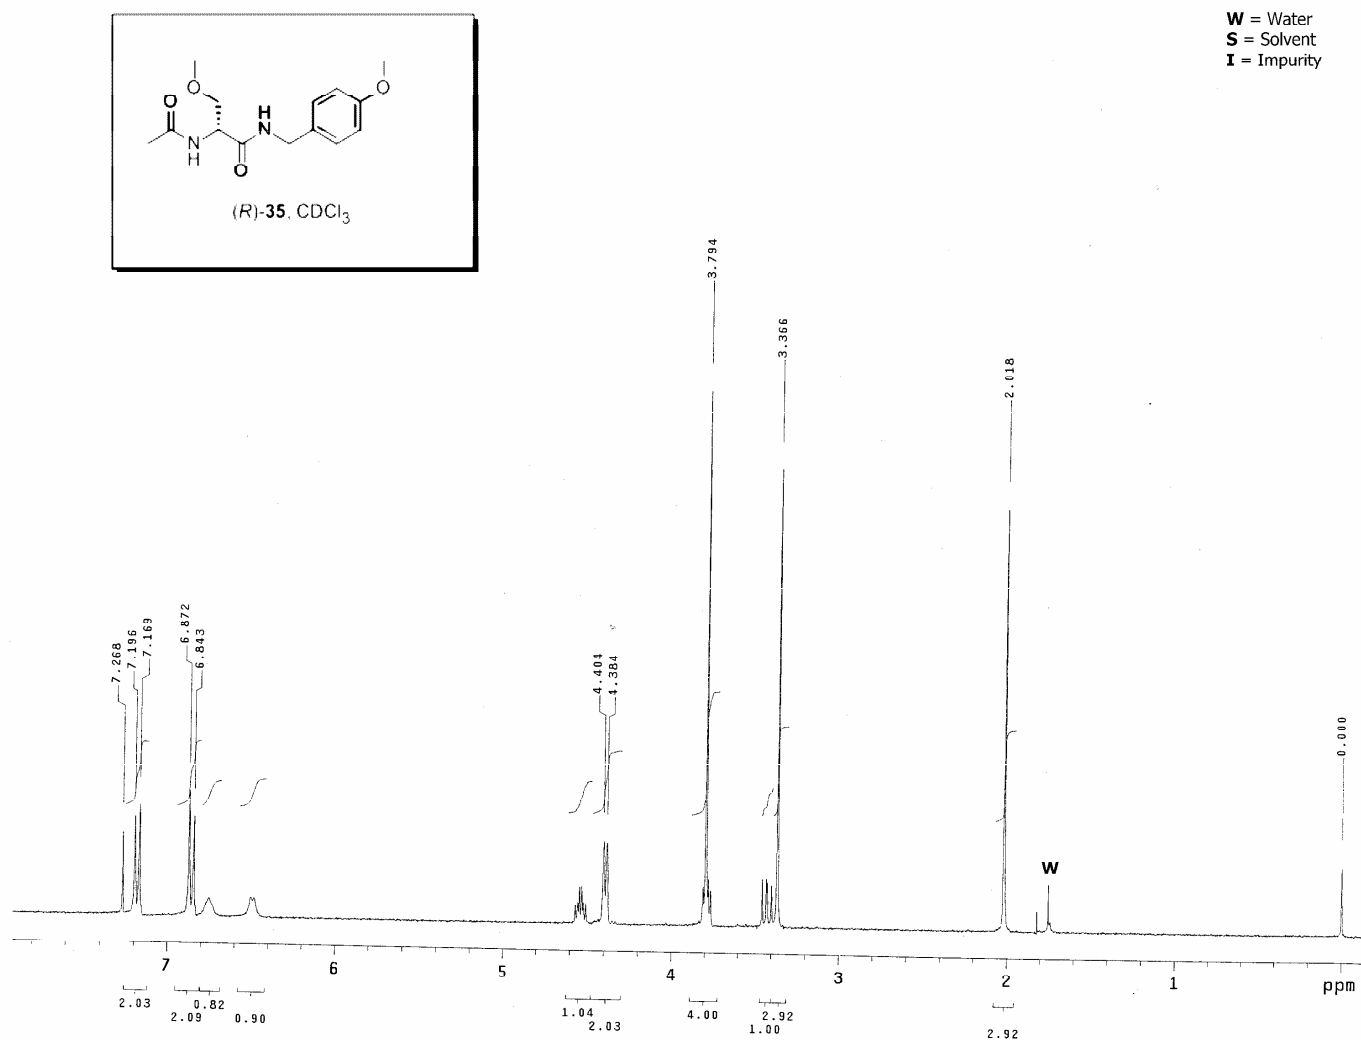

# Supporting Information

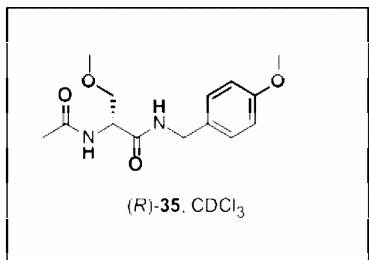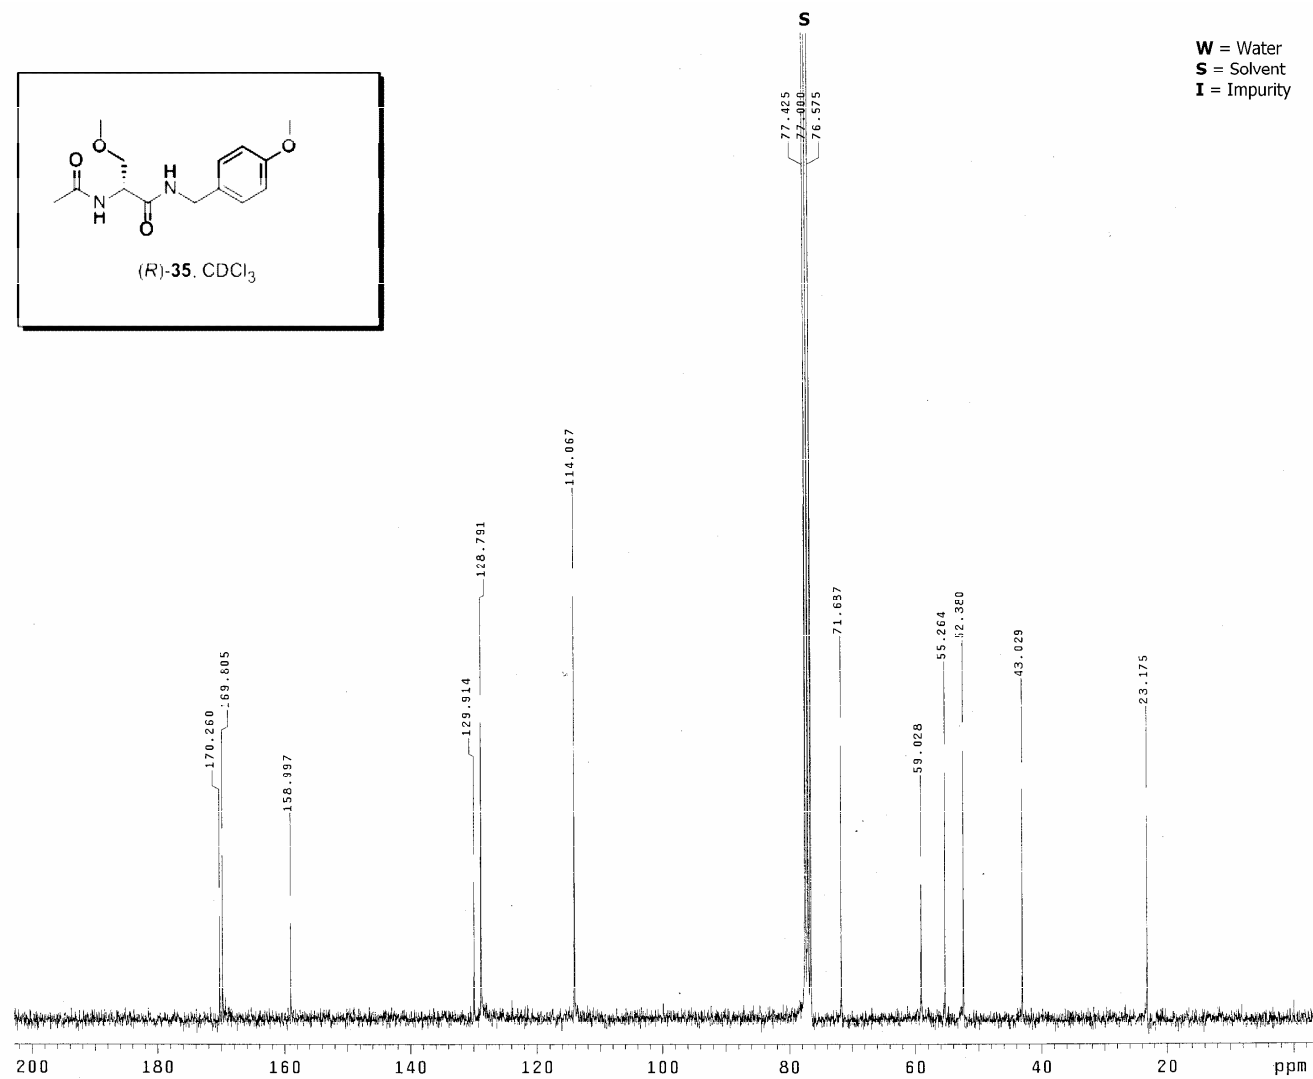

# Supporting Information

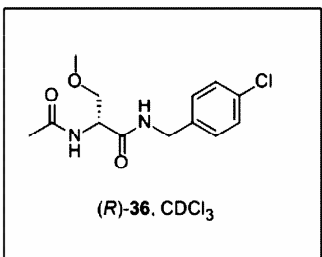

W = Water  
S = Solvent  
I = Impurity

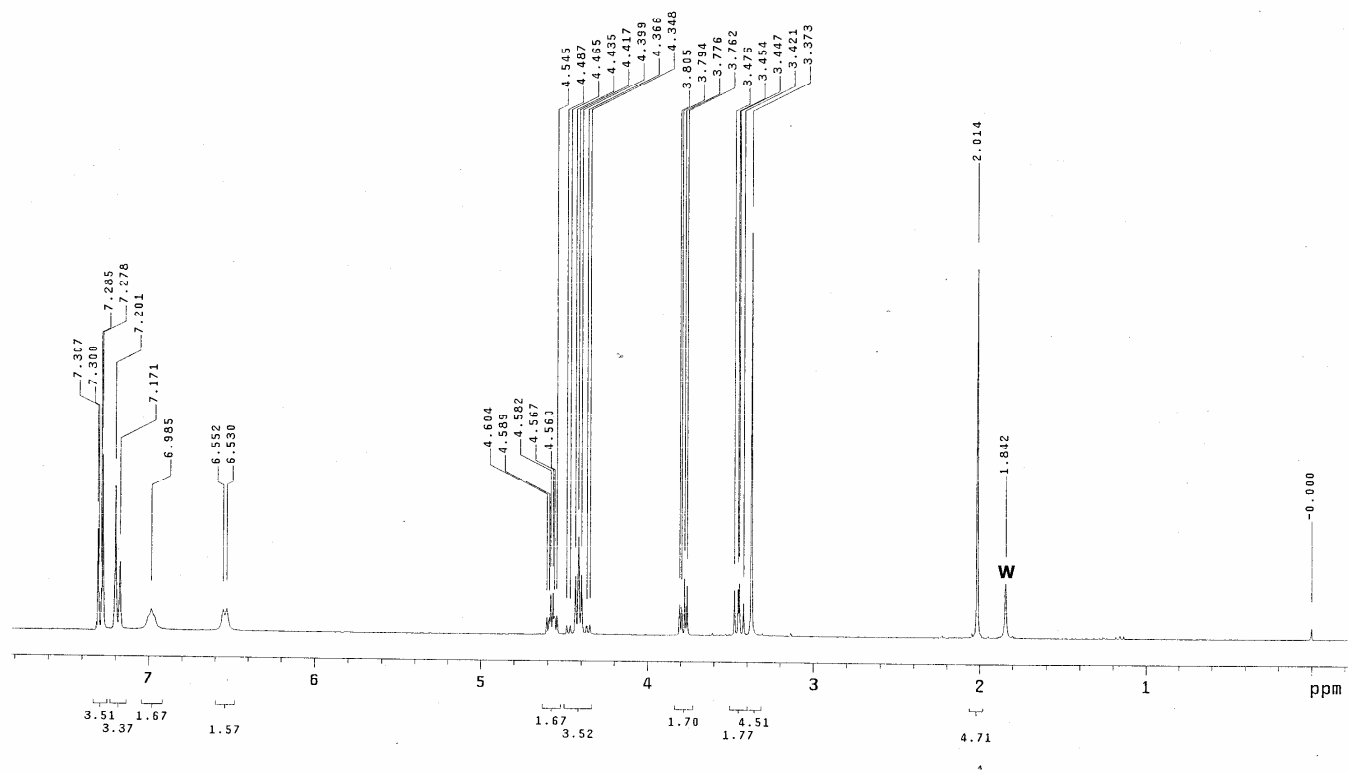

# Supporting Information

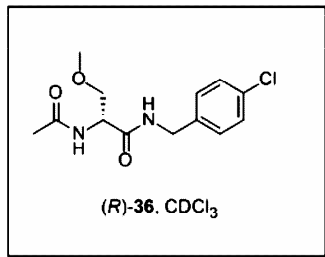

W = Water  
S = Solvent  
I = Impurity

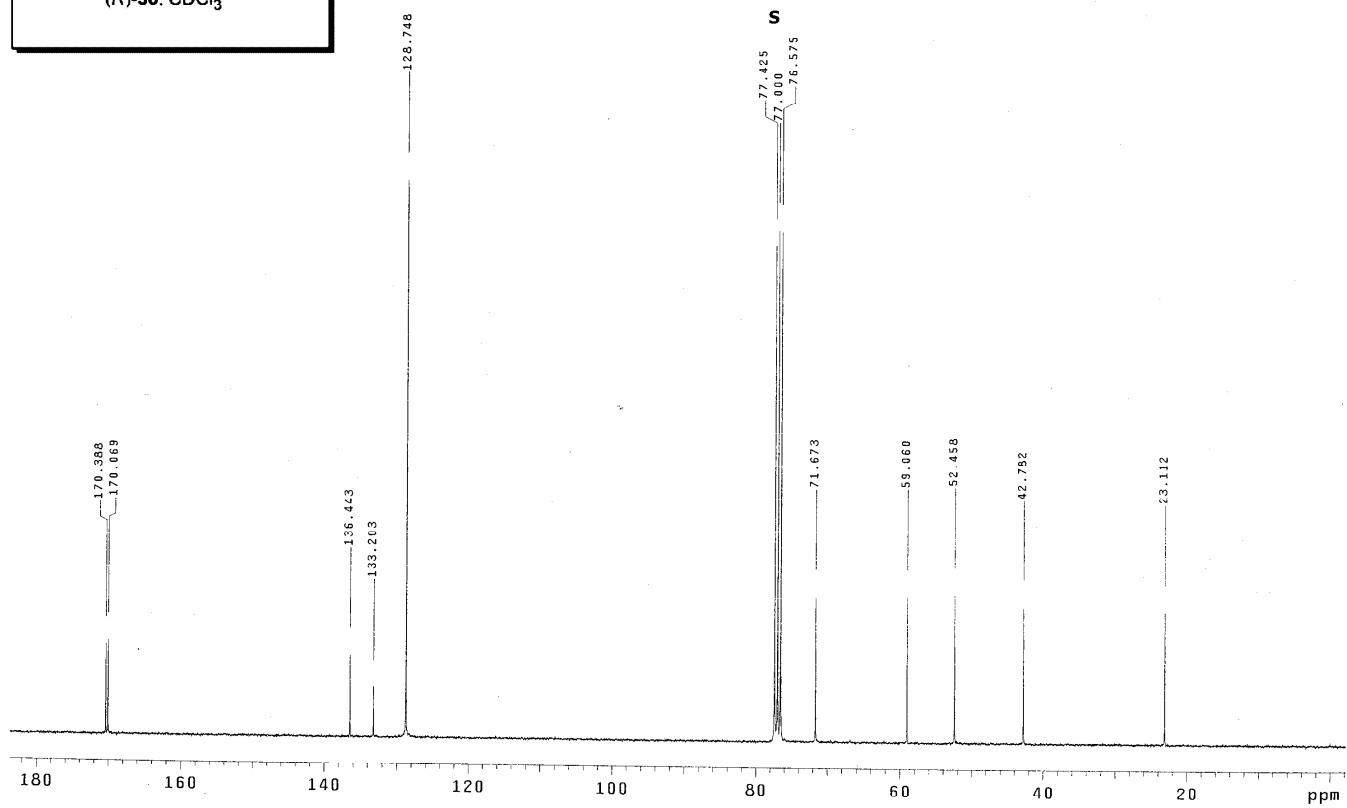



# Supporting Information

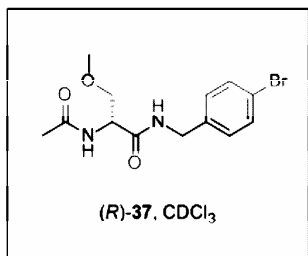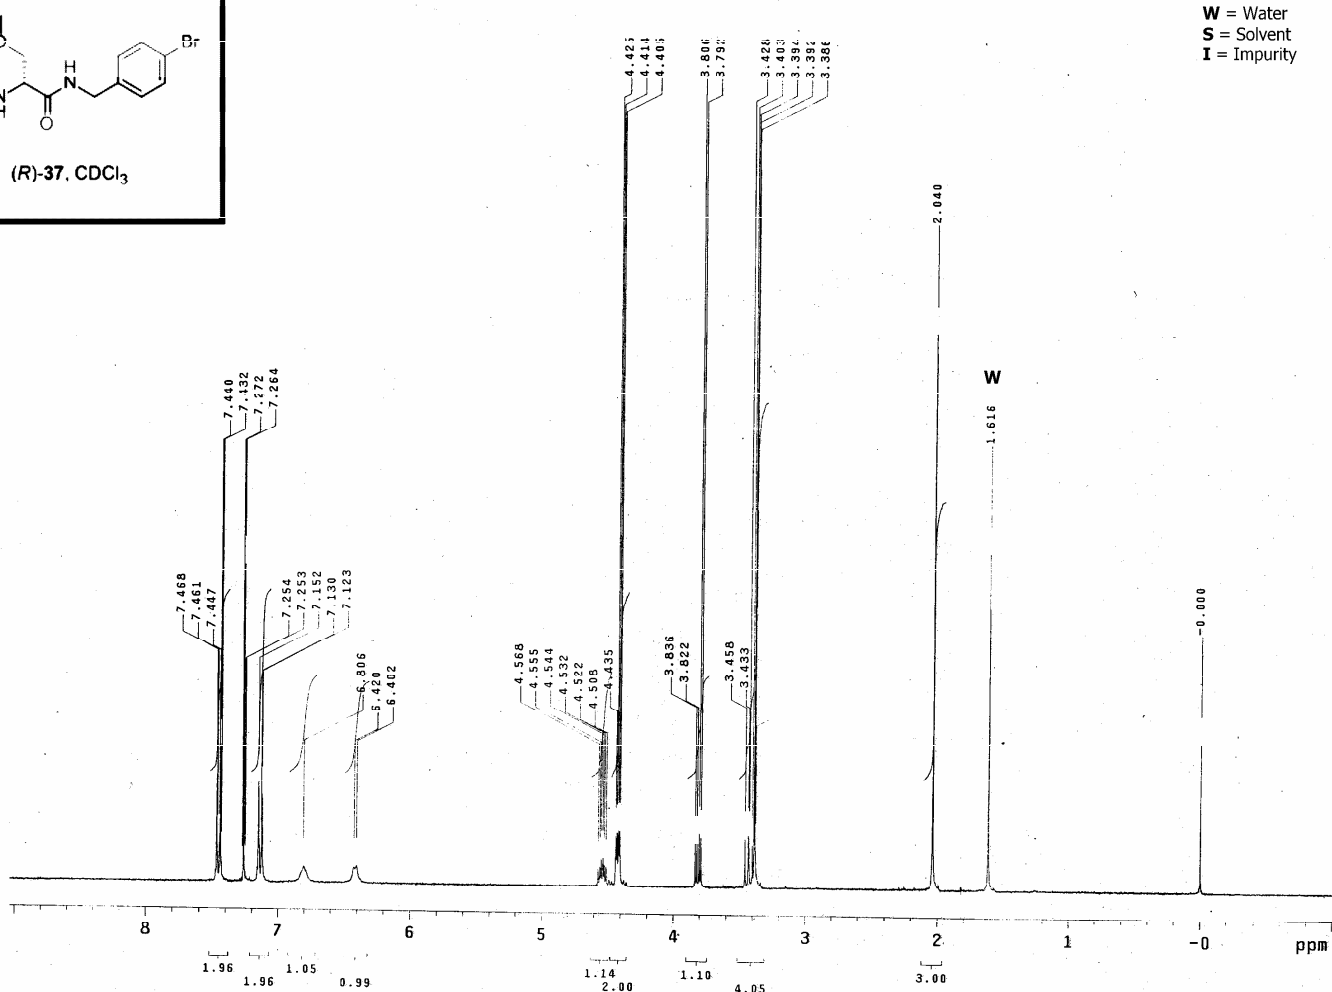

# Supporting Information

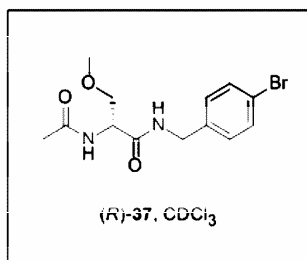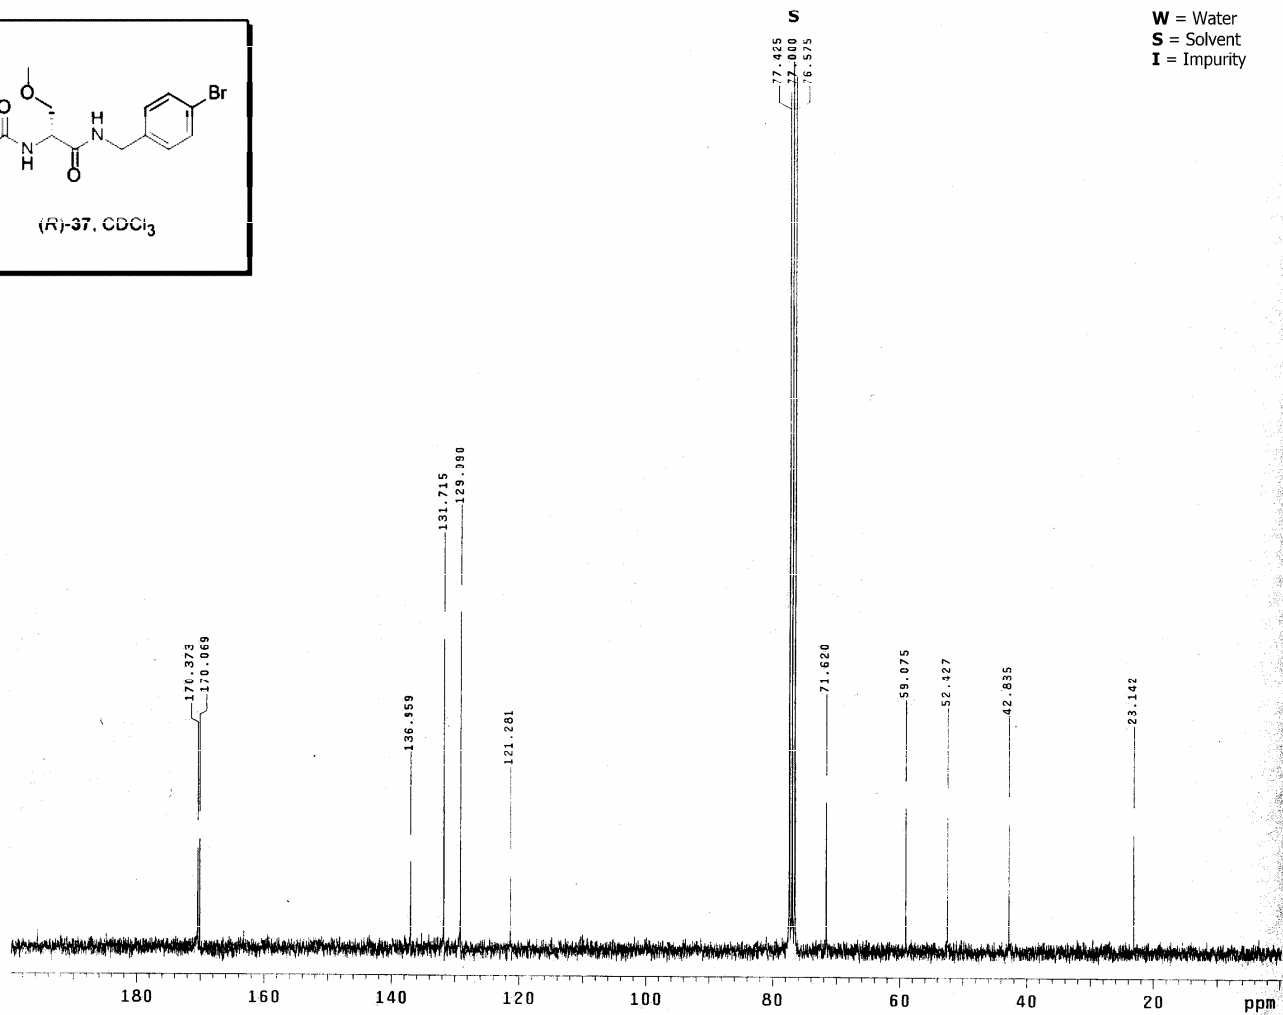

# Supporting Information

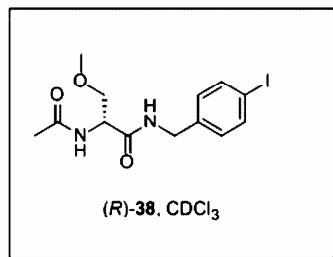

W = Water  
S = Solvent  
I = Impurity

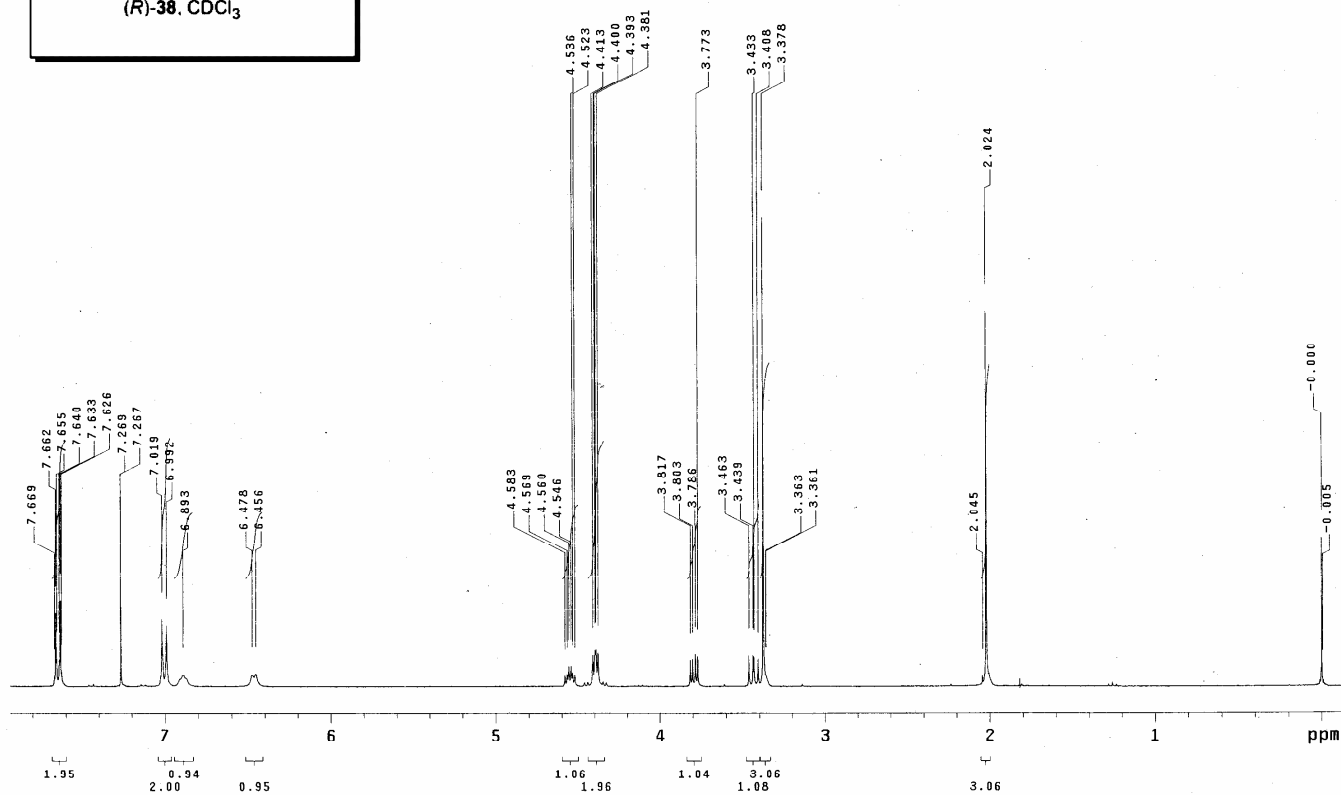

# Supporting Information

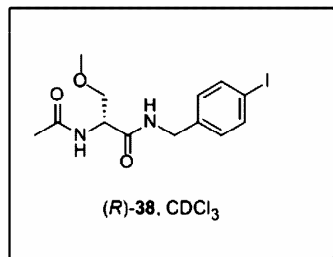

W = Water  
S = Solvent  
I = Impurity

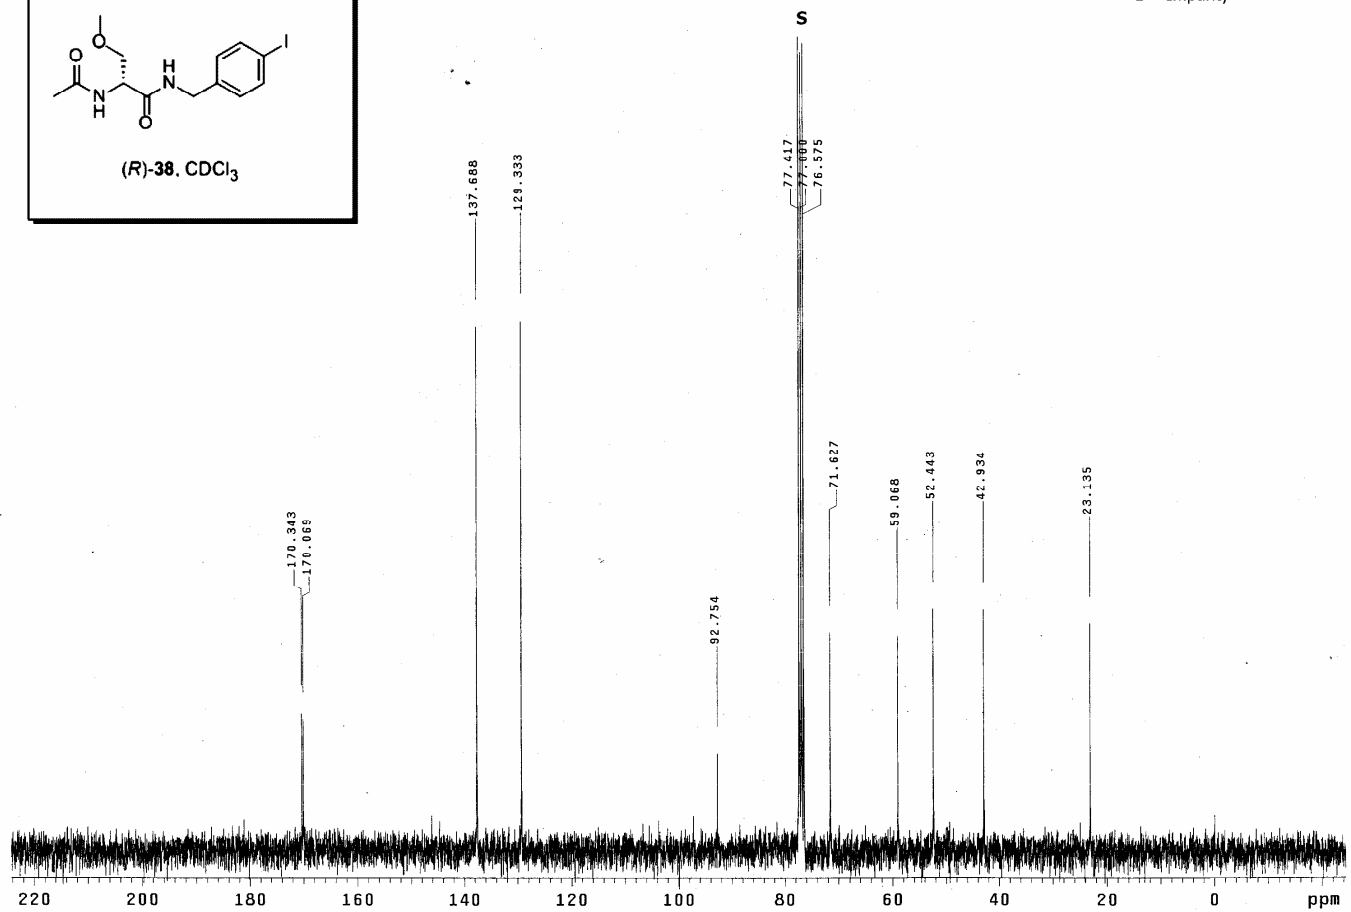

# Supporting Information

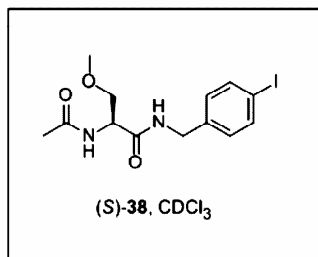

W = Water  
S = Solvent  
I = Impurity

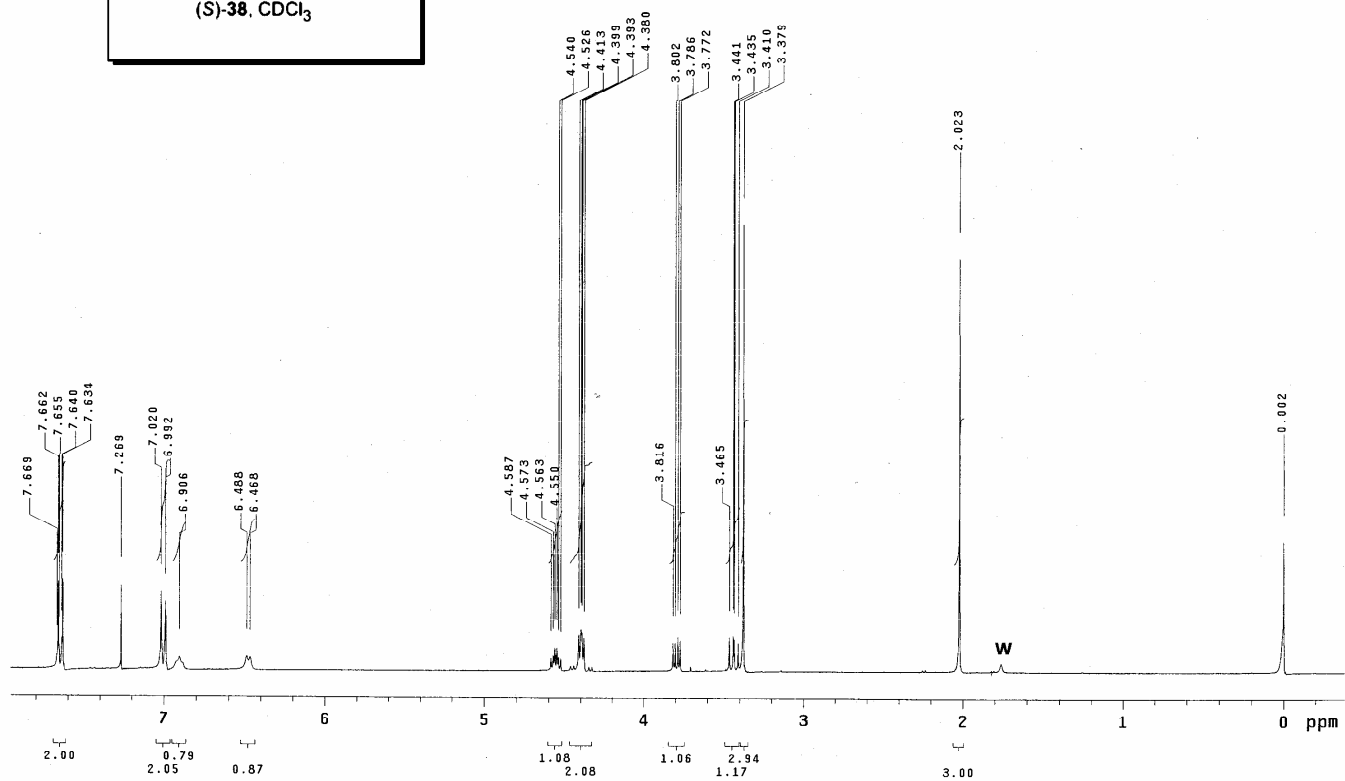

# Supporting Information

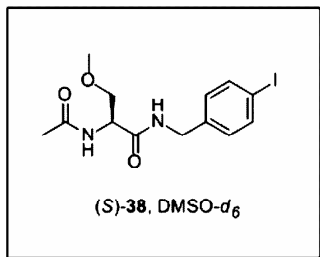

W = Water  
S = Solvent  
I = Impurity

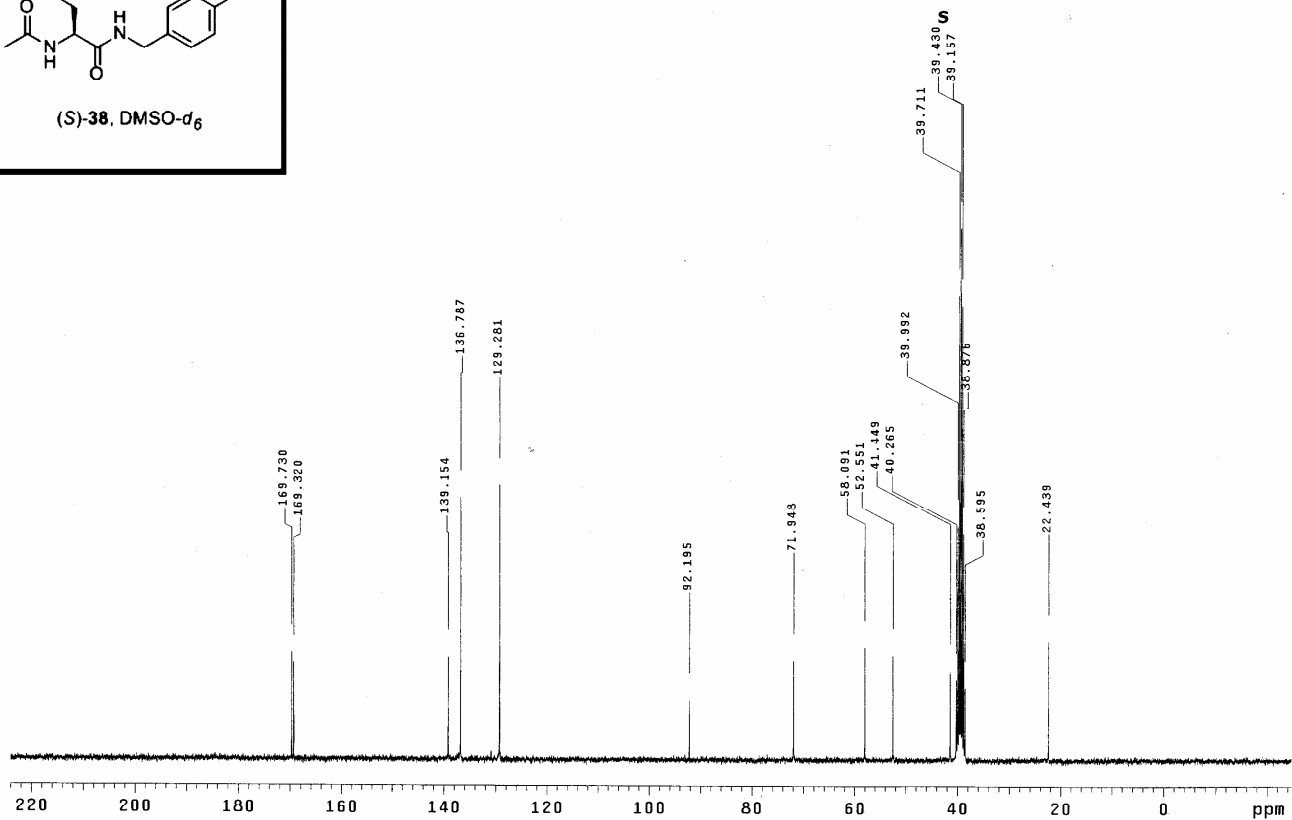

# Supporting Information

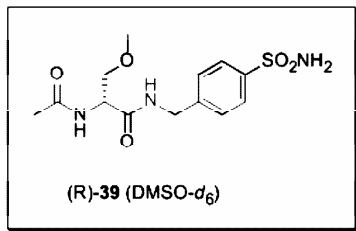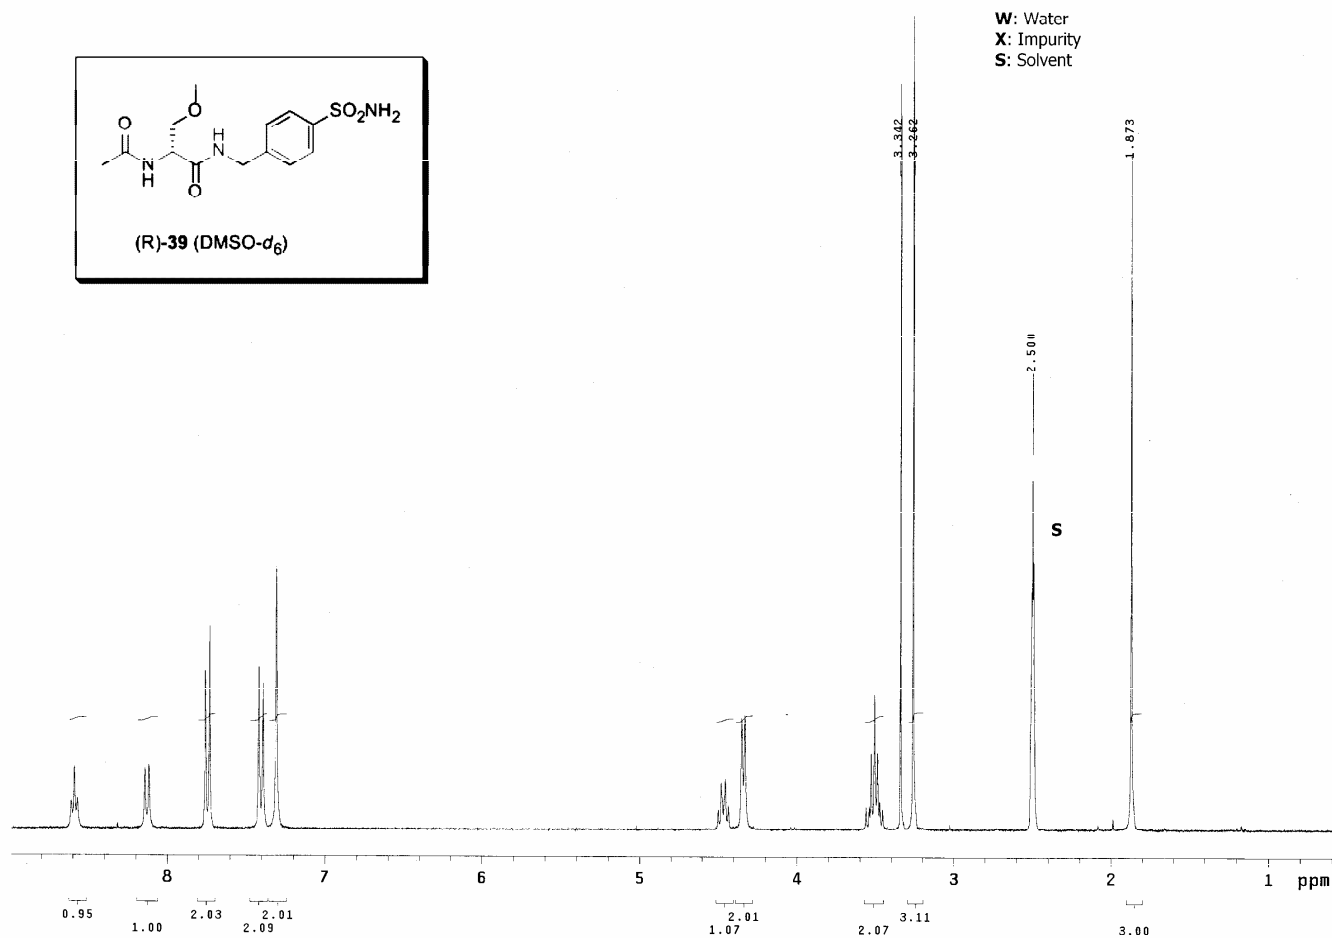

# Supporting Information

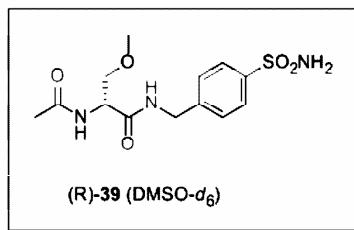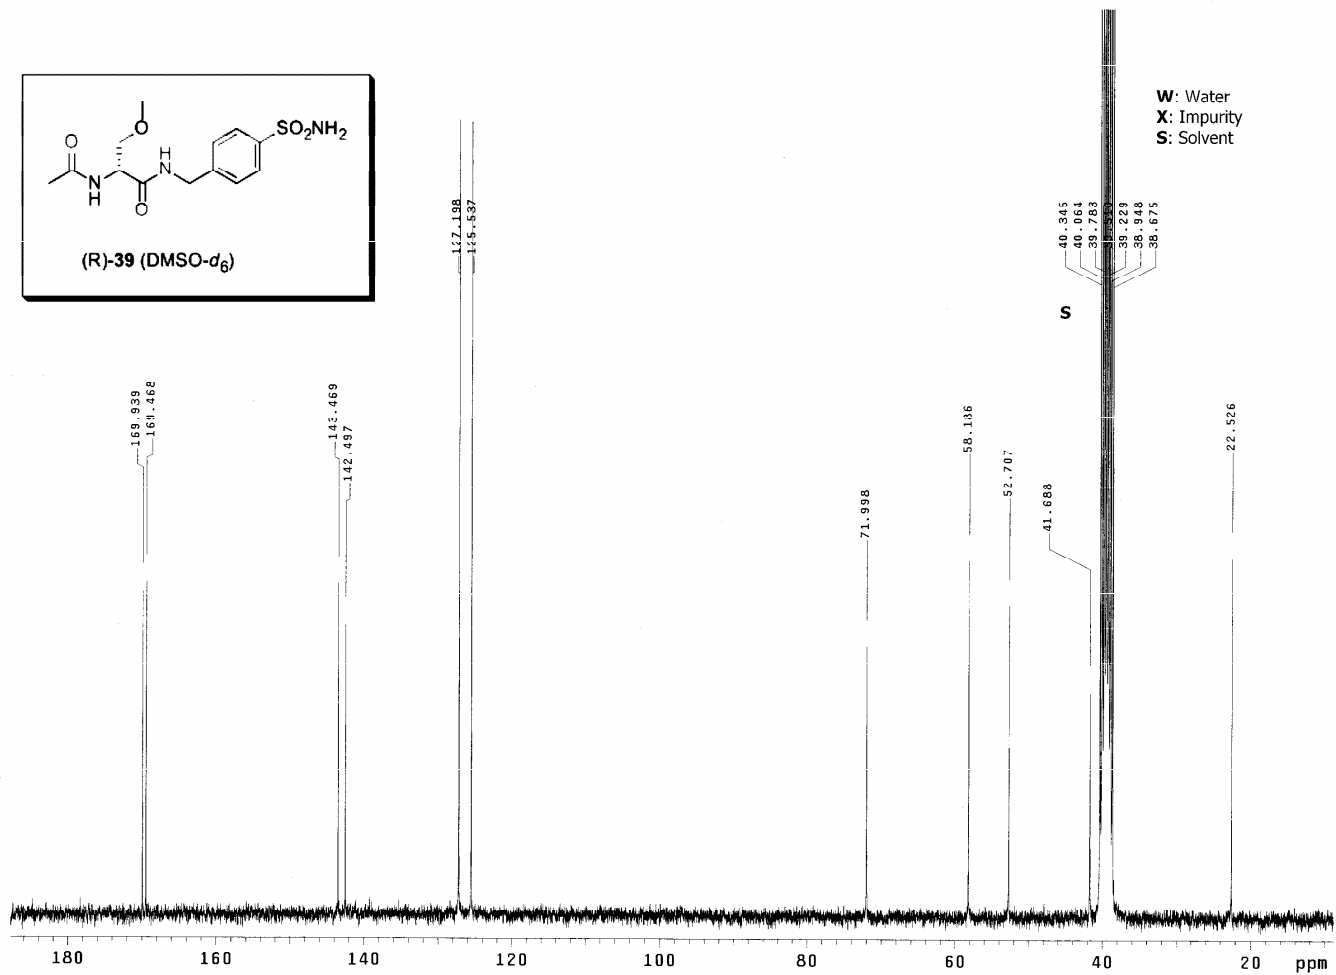



# Supporting Information

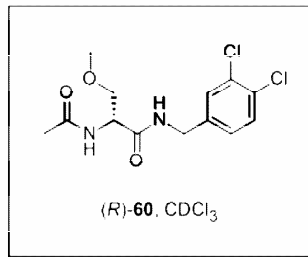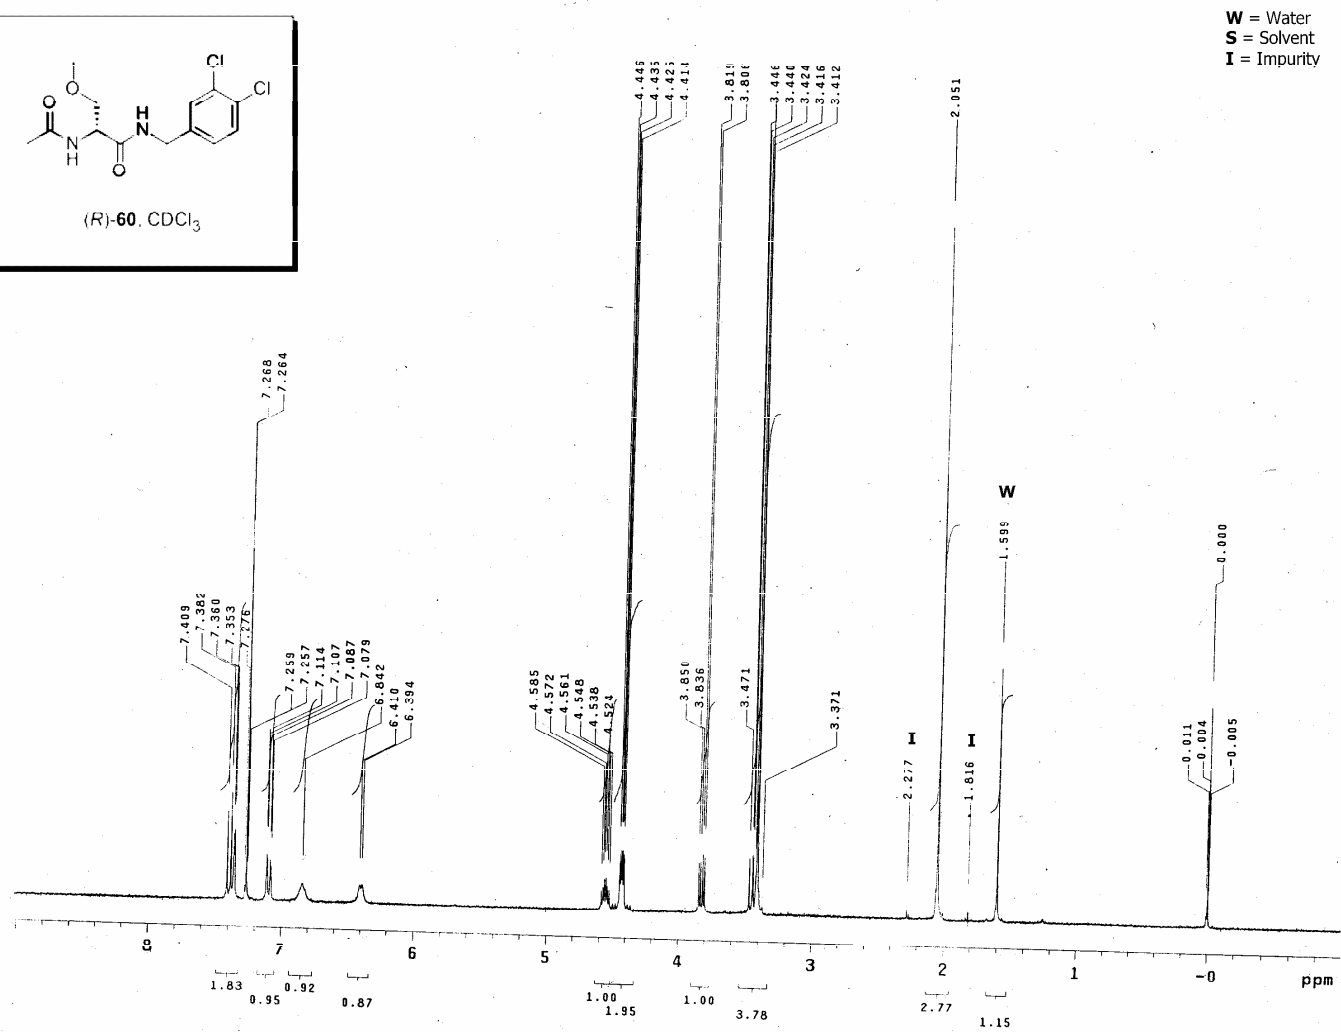

# Supporting Information

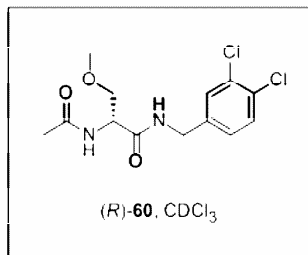

W = Water  
S = Solvent  
I = Impurity

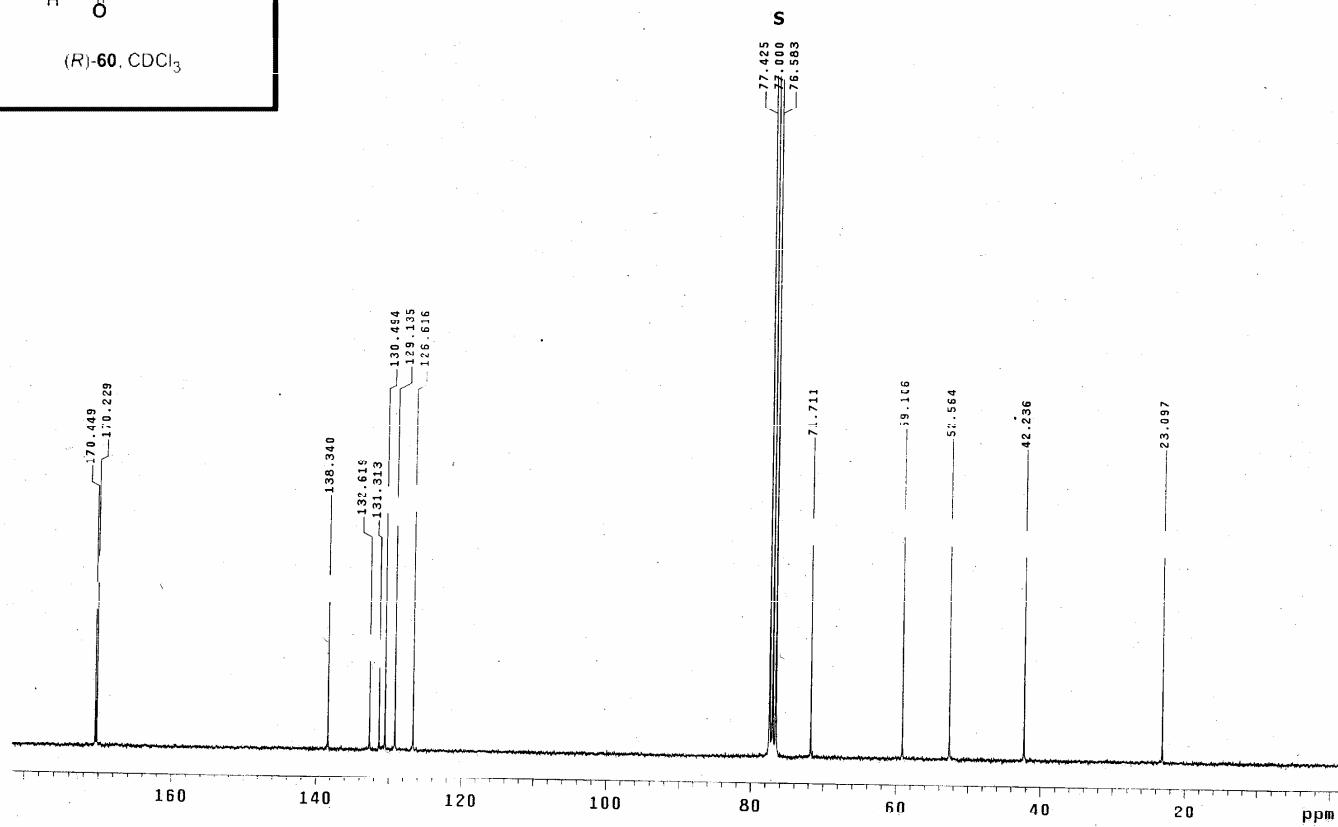

# Supporting Information

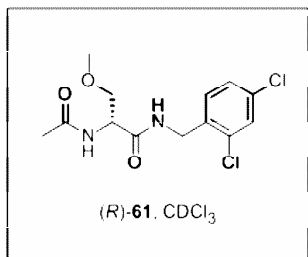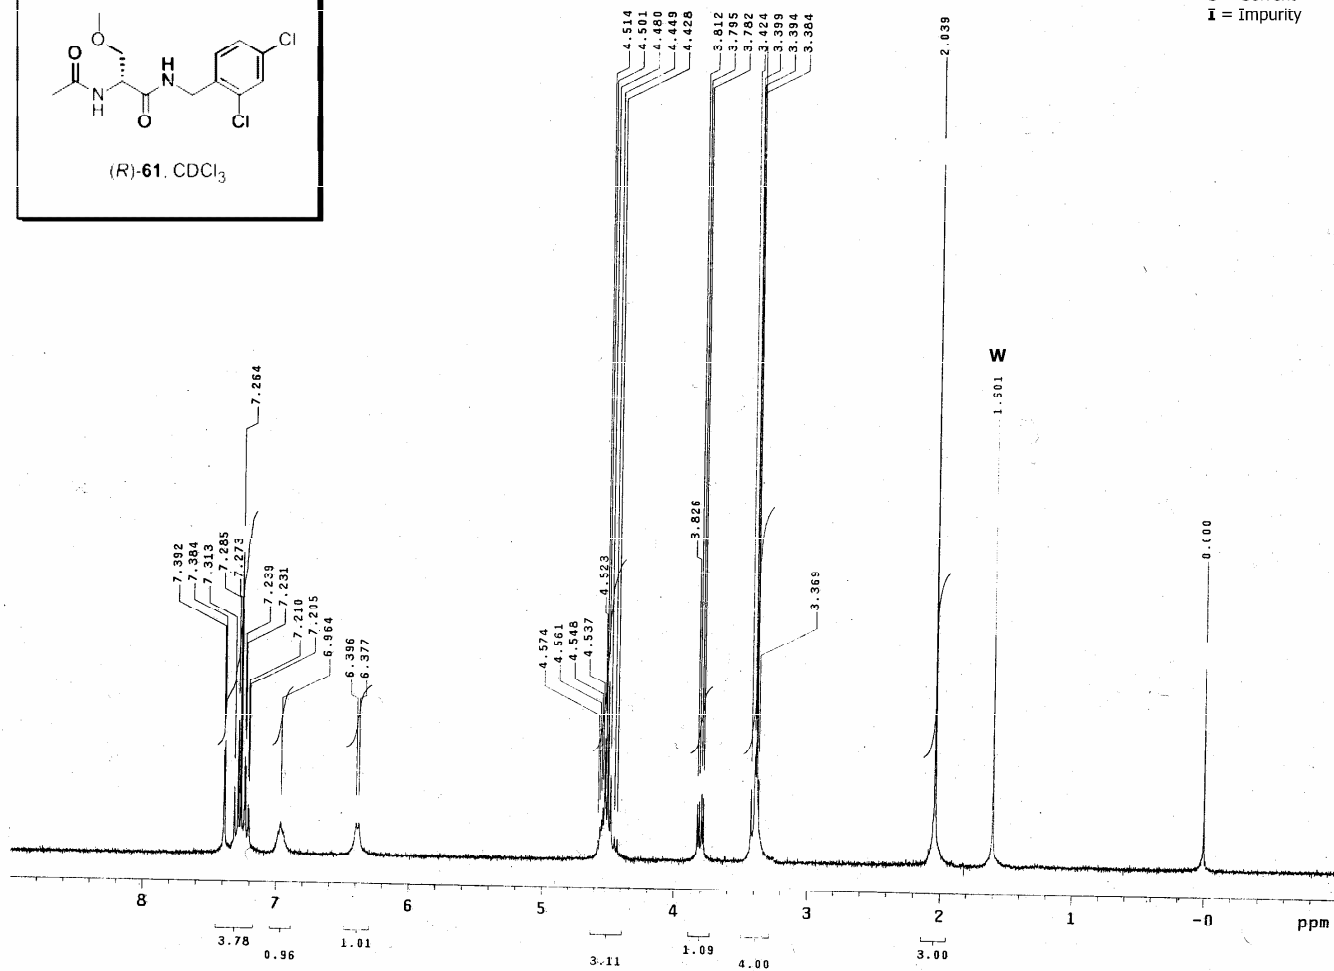

# Supporting Information

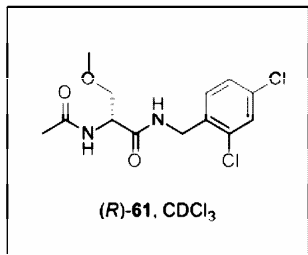

W = Water  
S = Solvent  
I = Impurity

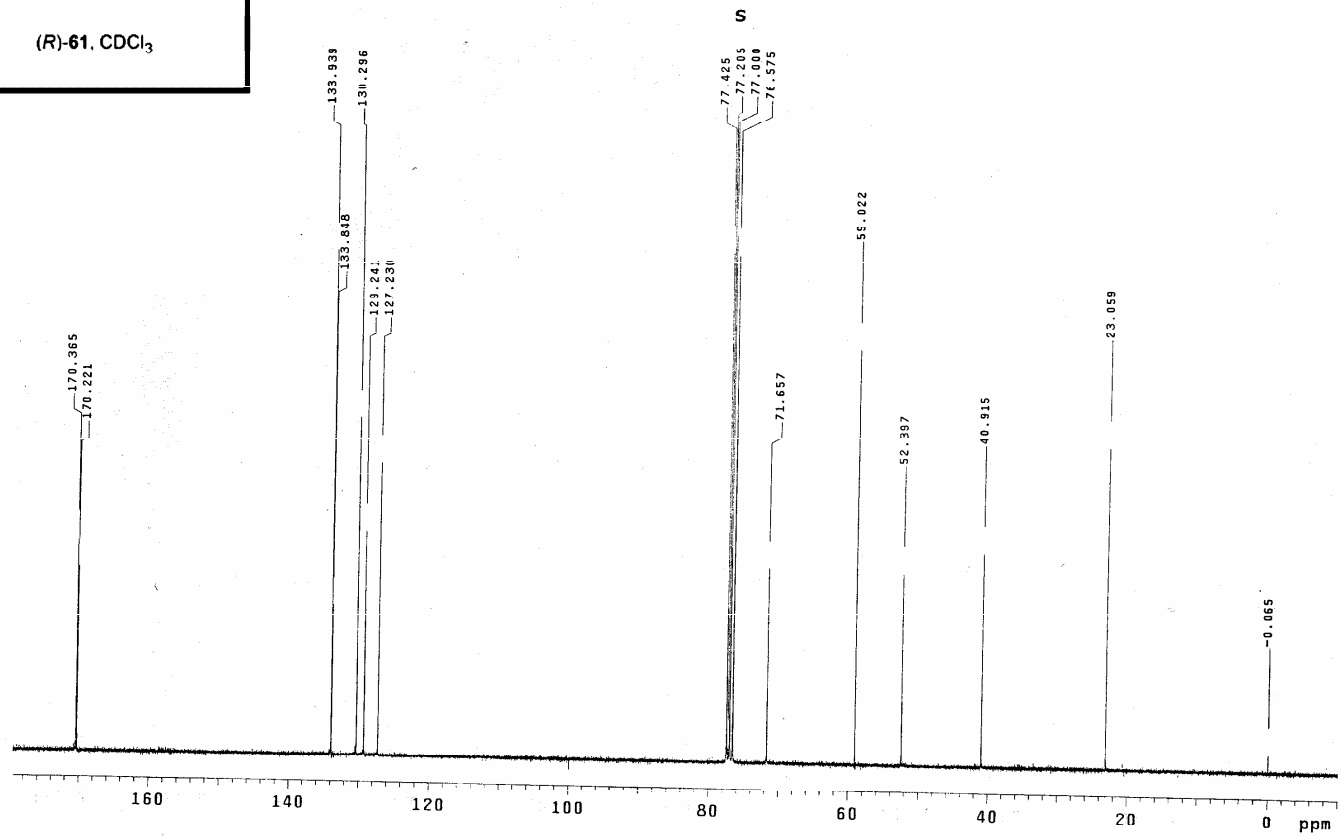

## Supporting Information

**Table S1.** Elemental Analysis of Newly Prepared Compounds.

| No.    | Formula                                                                             | Calcd. |      |       |       |    |    |   | Found |      |       |       |    |    |   |
|--------|-------------------------------------------------------------------------------------|--------|------|-------|-------|----|----|---|-------|------|-------|-------|----|----|---|
|        |                                                                                     | C      | H    | N     | F     | Cl | Br | I | C     | H    | N     | F     | Cl | Br | I |
| (R)-62 | C <sub>15</sub> H <sub>21</sub> FN <sub>2</sub> O <sub>4</sub>                      | 57.68  | 6.78 | 8.97  | 6.08  |    |    |   | 57.63 | 6.87 | 9.01  | 5.92  |    |    |   |
| (R)-63 | C <sub>16</sub> H <sub>23</sub> FN <sub>2</sub> O <sub>4</sub>                      | 58.88  | 7.10 | 8.58  | 5.82  |    |    |   | 59.15 | 7.20 | 8.52  | 5.78  |    |    |   |
| (R)-4  | C <sub>13</sub> H <sub>17</sub> FN <sub>2</sub> O <sub>3</sub>                      | 58.20  | 6.63 | 10.44 | 7.08  |    |    |   | 58.12 | 6.40 | 10.41 | 6.96  |    |    |   |
| (R)-64 | C <sub>19</sub> H <sub>19</sub> F <sub>3</sub> N <sub>2</sub> O <sub>5</sub>        | 55.34  | 4.64 | 6.79  | 13.82 |    |    |   | 55.27 | 4.62 | 6.74  | 13.80 |    |    |   |
| (R)-65 | C <sub>20</sub> H <sub>21</sub> F <sub>3</sub> N <sub>2</sub> O <sub>5</sub>        | 56.34  | 4.96 | 6.57  | 13.37 |    |    |   | 56.30 | 4.98 | 6.89  | 13.22 |    |    |   |
| (R)-7  | C <sub>14</sub> H <sub>17</sub> F <sub>3</sub> N <sub>2</sub> O <sub>4</sub>        | 50.30  | 5.13 | 8.38  | 17.05 |    |    |   | 50.28 | 5.21 | 8.18  | 17.30 |    |    |   |
| (R)-66 | C <sub>19</sub> H <sub>19</sub> F <sub>3</sub> N <sub>2</sub> O <sub>3</sub>        | 55.34  | 4.64 | 6.79  | 13.82 |    |    |   | 55.44 | 4.59 | 6.79  | 13.66 |    |    |   |
| (R)-67 | C <sub>20</sub> H <sub>21</sub> F <sub>3</sub> N <sub>2</sub> O <sub>5</sub>        | 56.34  | 4.96 | 6.57  | 13.37 |    |    |   | 56.15 | 4.86 | 6.48  | 13.23 |    |    |   |
| (R)-8  | C <sub>14</sub> H <sub>17</sub> F <sub>3</sub> N <sub>2</sub> O <sub>4</sub>        | 50.30  | 5.13 | 8.38  | 17.05 |    |    |   | 50.25 | 5.07 | 8.17  | 16.78 |    |    |   |
| (R)-68 | C <sub>19</sub> H <sub>19</sub> F <sub>3</sub> N <sub>2</sub> O <sub>5</sub>        | 55.34  | 4.64 | 6.79  | 13.82 |    |    |   | 55.06 | 4.61 | 6.74  | 13.70 |    |    |   |
| (R)-69 | C <sub>20</sub> H <sub>21</sub> F <sub>3</sub> N <sub>2</sub> O <sub>5</sub>        | 56.34  | 4.96 | 6.57  | 13.37 |    |    |   | 56.34 | 4.97 | 6.63  | 13.28 |    |    |   |
| (R)-9  | C <sub>14</sub> H <sub>17</sub> F <sub>3</sub> N <sub>2</sub> O <sub>4</sub>        | 50.30  | 5.13 | 8.38  | 17.30 |    |    |   | 50.45 | 5.13 | 8.39  | 17.18 |    |    |   |
| (R)-70 | C <sub>19</sub> H <sub>22</sub> N <sub>2</sub> O <sub>4</sub>                       | 66.65  | 6.48 | 8.18  |       |    |    |   | 66.49 | 6.53 | 8.07  |       |    |    |   |
| (R)-71 | C <sub>20</sub> H <sub>24</sub> N <sub>2</sub> O <sub>4</sub>                       | 67.40  | 6.79 | 7.86  |       |    |    |   | 67.22 | 6.82 | 7.82  |       |    |    |   |
| (R)-10 | C <sub>14</sub> H <sub>20</sub> N <sub>2</sub> O <sub>3</sub>                       | 63.62  | 7.63 | 10.60 |       |    |    |   | 63.44 | 7.68 | 10.60 |       |    |    |   |
| (R)-72 | C <sub>20</sub> H <sub>24</sub> N <sub>2</sub> O <sub>4</sub>                       | 67.40  | 6.79 | 7.86  |       |    |    |   | 67.31 | 6.81 | 7.88  |       |    |    |   |
| (S)-72 | C <sub>20</sub> H <sub>24</sub> N <sub>2</sub> O <sub>4</sub>                       | 67.40  | 6.79 | 7.86  |       |    |    |   | 67.40 | 6.78 | 7.86  |       |    |    |   |
| (R)-73 | C <sub>21</sub> H <sub>26</sub> N <sub>2</sub> O <sub>4</sub>                       | 68.09  | 7.07 | 7.56  |       |    |    |   | 67.86 | 7.10 | 7.59  |       |    |    |   |
| (S)-73 | C <sub>21</sub> H <sub>26</sub> N <sub>2</sub> O <sub>4</sub> •0.05H <sub>2</sub> O | 67.91  | 7.08 | 7.54  |       |    |    |   | 67.66 | 7.18 | 7.59  |       |    |    |   |
| (R)-11 | C <sub>15</sub> H <sub>22</sub> N <sub>2</sub> O <sub>3</sub>                       | 64.73  | 7.97 | 10.06 |       |    |    |   | 64.52 | 7.98 | 10.05 |       |    |    |   |
| (S)-11 | C <sub>15</sub> H <sub>22</sub> N <sub>2</sub> O <sub>3</sub>                       | 64.73  | 7.97 | 10.06 |       |    |    |   | 64.73 | 7.98 | 10.04 |       |    |    |   |
| (R)-12 | C <sub>16</sub> H <sub>24</sub> N <sub>2</sub> O <sub>3</sub>                       | 65.73  | 8.27 | 9.58  |       |    |    |   | 66.01 | 8.24 | 9.36  |       |    |    |   |
| (R)-74 | C <sub>21</sub> H <sub>26</sub> N <sub>2</sub> O <sub>4</sub>                       | 68.09  | 7.07 | 7.56  |       |    |    |   | 67.82 | 6.98 | 7.47  |       |    |    |   |
| (R)-75 | C <sub>22</sub> H <sub>28</sub> N <sub>2</sub> O <sub>4</sub>                       | 68.73  | 7.34 | 7.29  |       |    |    |   | 68.71 | 7.40 | 7.29  |       |    |    |   |

## Supporting Information

|        |                                                                                                                                |       |      |       |       |       |  |  |       |      |       |       |       |  |
|--------|--------------------------------------------------------------------------------------------------------------------------------|-------|------|-------|-------|-------|--|--|-------|------|-------|-------|-------|--|
| (R)-13 | C <sub>16</sub> H <sub>22</sub> N <sub>2</sub> O <sub>3</sub>                                                                  | 65.73 | 8.27 | 9.58  |       |       |  |  | 65.46 | 8.21 | 9.48  |       |       |  |
| (R)-76 | C <sub>22</sub> H <sub>28</sub> N <sub>2</sub> O <sub>4</sub>                                                                  | 68.73 | 7.34 | 7.29  |       |       |  |  | 68.60 | 7.36 | 7.26  |       |       |  |
| (R)-77 | C <sub>23</sub> H <sub>30</sub> N <sub>2</sub> O <sub>4</sub>                                                                  | 69.32 | 7.59 | 7.03  |       |       |  |  | 69.15 | 7.64 | 7.03  |       |       |  |
| (R)-14 | C <sub>17</sub> H <sub>26</sub> N <sub>2</sub> O <sub>3</sub>                                                                  | 66.64 | 8.55 | 9.14  |       |       |  |  | 66.61 | 8.49 | 9.09  |       |       |  |
| (R)-78 | C <sub>24</sub> H <sub>31</sub> N <sub>3</sub> O <sub>6</sub>                                                                  | 63.00 | 6.83 | 9.18  |       |       |  |  | 62.99 | 6.70 | 9.16  |       |       |  |
| (R)-79 | C <sub>25</sub> H <sub>33</sub> N <sub>3</sub> O <sub>6</sub>                                                                  | 63.68 | 7.05 | 8.91  |       |       |  |  | 63.61 | 7.12 | 8.88  |       |       |  |
| (R)-16 | C <sub>19</sub> H <sub>29</sub> N <sub>3</sub> O <sub>5</sub>                                                                  | 60.14 | 7.70 | 11.07 |       |       |  |  | 60.11 | 7.83 | 11.02 |       |       |  |
| (R)-15 | C <sub>20</sub> H <sub>24</sub> ClN <sub>2</sub> O <sub>4</sub> •0.49HCl                                                       | 50.38 | 6.79 | 12.59 |       |       |  |  | 50.15 | 6.90 | 12.29 |       |       |  |
| (R)-83 | C <sub>20</sub> H <sub>24</sub> N <sub>2</sub> O <sub>5</sub> •0.25H <sub>2</sub> O                                            | 63.73 | 6.55 | 7.43  |       |       |  |  | 63.35 | 6.43 | 7.29  |       |       |  |
| (R)-84 | C <sub>21</sub> H <sub>26</sub> N <sub>2</sub> O <sub>5</sub>                                                                  | 65.27 | 6.78 | 7.25  |       |       |  |  | 65.27 | 6.79 | 7.38  |       |       |  |
| (R)-17 | C <sub>15</sub> H <sub>22</sub> N <sub>2</sub> O <sub>4</sub>                                                                  | 61.21 | 7.45 | 9.52  |       |       |  |  | 60.88 | 7.45 | 9.35  |       |       |  |
| (R)-85 | C <sub>19</sub> H <sub>19</sub> F <sub>3</sub> N <sub>2</sub> O <sub>4</sub> •0.08C <sub>4</sub> H <sub>8</sub> O <sub>2</sub> | 57.52 | 4.91 | 6.93  | 14.11 |       |  |  | 57.14 | 4.82 | 6.99  | 13.71 |       |  |
| (R)-18 | C <sub>14</sub> H <sub>17</sub> N <sub>2</sub> O <sub>3</sub>                                                                  | 52.83 | 5.38 | 8.80  | 17.91 |       |  |  | 52.84 | 5.30 | 8.78  | 17.67 |       |  |
| 57     | C <sub>10</sub> H <sub>15</sub> NO•0.12THF                                                                                     | 72.38 | 9.25 | 8.04  |       |       |  |  | 72.78 | 9.25 | 7.65  |       |       |  |
| (R)-19 | C <sub>16</sub> H <sub>24</sub> N <sub>2</sub> O <sub>4</sub>                                                                  | 62.32 | 7.84 | 9.08  |       |       |  |  | 62.33 | 7.69 | 9.12  |       |       |  |
| (R)-20 | C <sub>17</sub> H <sub>26</sub> N <sub>2</sub> O <sub>4</sub>                                                                  | 63.33 | 8.13 | 8.69  |       |       |  |  | 63.12 | 8.13 | 8.64  |       |       |  |
| (R)-87 | C <sub>17</sub> H <sub>24</sub> N <sub>2</sub> O <sub>4</sub>                                                                  | 63.73 | 7.55 | 8.74  |       |       |  |  | 63.45 | 7.60 | 8.70  |       |       |  |
| (S)-87 | C <sub>17</sub> H <sub>24</sub> N <sub>2</sub> O <sub>4</sub>                                                                  | 63.73 | 7.55 | 8.74  |       |       |  |  | 63.55 | 7.63 | 8.57  |       |       |  |
| (R)-88 | C <sub>18</sub> H <sub>26</sub> N <sub>2</sub> O <sub>4</sub>                                                                  | 64.65 | 7.84 | 8.38  |       |       |  |  | 64.51 | 7.88 | 8.33  |       |       |  |
| (S)-88 | C <sub>18</sub> H <sub>26</sub> N <sub>2</sub> O <sub>4</sub>                                                                  | 64.65 | 7.84 | 8.38  |       |       |  |  | 64.73 | 7.98 | 8.25  |       |       |  |
| (R)-21 | C <sub>15</sub> H <sub>20</sub> N <sub>2</sub> O <sub>3</sub>                                                                  | 65.20 | 7.30 | 10.14 |       |       |  |  | 65.17 | 7.33 | 10.02 |       |       |  |
| (S)-21 | C <sub>15</sub> H <sub>20</sub> N <sub>2</sub> O <sub>3</sub> •0.10H <sub>2</sub> O                                            | 64.78 | 7.32 | 10.07 |       |       |  |  | 64.83 | 7.31 | 10.00 |       |       |  |
| (R)-89 | C <sub>21</sub> H <sub>26</sub> N <sub>2</sub> O <sub>4</sub>                                                                  | 68.09 | 7.07 | 7.56  |       |       |  |  | 68.09 | 7.14 | 7.48  |       |       |  |
| (R)-90 | C <sub>22</sub> H <sub>28</sub> N <sub>2</sub> O <sub>4</sub>                                                                  | 68.73 | 7.34 | 7.29  |       |       |  |  | 68.52 | 7.48 | 7.24  |       |       |  |
| (R)-91 | C <sub>17</sub> H <sub>21</sub> ClN <sub>2</sub> O <sub>2</sub>                                                                | 63.64 | 6.60 | 8.73  |       | 11.05 |  |  | 63.42 | 6.65 | 8.64  |       | 11.04 |  |
| (R)-22 | C <sub>19</sub> H <sub>22</sub> N <sub>2</sub> O <sub>3</sub> •0.10H <sub>2</sub> O                                            | 69.54 | 6.82 | 8.54  |       |       |  |  | 69.23 | 6.76 | 8.42  |       |       |  |
| (R)-26 | C <sub>18</sub> H <sub>26</sub> N <sub>2</sub> O <sub>3</sub> Si                                                               | 62.39 | 7.56 | 8.08  |       |       |  |  | 62.41 | 7.60 | 7.99  |       |       |  |
| (S)-26 | C <sub>18</sub> H <sub>26</sub> N <sub>2</sub> O <sub>3</sub> Si                                                               | 62.39 | 7.56 | 8.08  |       |       |  |  | 62.10 | 7.67 | 7.93  |       |       |  |
| (R)-23 | C <sub>15</sub> H <sub>18</sub> N <sub>2</sub> O <sub>3</sub>                                                                  | 65.68 | 6.61 | 10.21 |       |       |  |  | 65.39 | 6.58 | 10.08 |       |       |  |
| (S)-23 | C <sub>15</sub> H <sub>18</sub> N <sub>2</sub> O <sub>3</sub> •0.25H <sub>2</sub> O                                            | 64.62 | 6.69 | 10.05 |       |       |  |  | 64.60 | 6.57 | 9.99  |       |       |  |

## Supporting Information

|         |                                                                                      |       |      |       |       |  |  |  |       |      |       |       |  |  |
|---------|--------------------------------------------------------------------------------------|-------|------|-------|-------|--|--|--|-------|------|-------|-------|--|--|
| (R)-24  | C <sub>16</sub> H <sub>20</sub> N <sub>2</sub> O <sub>3</sub> ●0.20H <sub>2</sub> O  | 65.62 | 7.06 | 9.57  |       |  |  |  | 65.98 | 7.02 | 9.17  |       |  |  |
| (R)-25  | C <sub>19</sub> H <sub>26</sub> N <sub>2</sub> O <sub>3</sub> ●0.20H <sub>2</sub> O  | 68.32 | 7.97 | 8.39  |       |  |  |  | 68.25 | 7.96 | 8.33  |       |  |  |
| (R)-27  | C <sub>17</sub> H <sub>22</sub> N <sub>2</sub> O <sub>4</sub> ●0.33H <sub>2</sub> O  | 62.95 | 7.04 | 8.64  |       |  |  |  | 62.98 | 6.78 | 8.47  |       |  |  |
| (R)-92  | C <sub>19</sub> H <sub>19</sub> N <sub>3</sub> O <sub>4</sub> ●0.25H <sub>2</sub> O  | 63.77 | 5.49 | 11.74 |       |  |  |  | 64.01 | 5.37 | 11.73 |       |  |  |
| (S)-92  | C <sub>19</sub> H <sub>19</sub> N <sub>3</sub> O <sub>4</sub>                        | 64.58 | 5.42 | 11.89 |       |  |  |  | 64.20 | 5.38 | 11.70 |       |  |  |
| (R)-93  | C <sub>20</sub> H <sub>21</sub> N <sub>3</sub> O <sub>4</sub> ●0.25H <sub>2</sub> O  | 64.59 | 5.83 | 11.30 |       |  |  |  | 64.61 | 5.79 | 11.01 |       |  |  |
| (S)-93  | C <sub>20</sub> H <sub>21</sub> N <sub>3</sub> O <sub>4</sub> ●0.25H <sub>2</sub> O  | 64.59 | 5.83 | 11.30 |       |  |  |  | 64.63 | 5.70 | 11.51 |       |  |  |
| (R)-28  | C <sub>14</sub> H <sub>17</sub> N <sub>3</sub> O <sub>3</sub> ●0.25H <sub>2</sub> O  | 60.09 | 6.30 | 15.02 |       |  |  |  | 60.17 | 6.22 | 14.66 |       |  |  |
| (S)-28  | C <sub>14</sub> H <sub>17</sub> N <sub>3</sub> O <sub>3</sub>                        | 61.08 | 6.22 | 15.16 |       |  |  |  | 61.02 | 6.35 | 15.08 |       |  |  |
| (R)-97  | C <sub>21</sub> H <sub>24</sub> N <sub>2</sub> O <sub>6</sub>                        | 62.99 | 6.04 | 7.00  |       |  |  |  | 62.86 | 6.05 | 7.06  |       |  |  |
| (S)-97  | C <sub>21</sub> H <sub>24</sub> N <sub>2</sub> O <sub>6</sub>                        | 62.99 | 6.04 | 7.00  |       |  |  |  | 63.00 | 6.03 | 6.97  |       |  |  |
| (R)-98  | C <sub>22</sub> H <sub>26</sub> N <sub>2</sub> O <sub>6</sub> ●0.25H <sub>2</sub> O  | 63.07 | 6.38 | 6.69  |       |  |  |  | 63.09 | 6.37 | 6.64  |       |  |  |
| (S)-98  | C <sub>22</sub> H <sub>26</sub> N <sub>2</sub> O <sub>6</sub> ●0.25H <sub>2</sub> O  | 63.07 | 6.38 | 6.69  |       |  |  |  | 63.18 | 6.38 | 6.70  |       |  |  |
| (R)-99  | C <sub>14</sub> H <sub>20</sub> N <sub>2</sub> O <sub>4</sub> ●0.25CH <sub>4</sub> O | 59.36 | 7.34 | 9.72  |       |  |  |  | 59.33 | 7.14 | 9.45  |       |  |  |
| (S)-99  | C <sub>14</sub> H <sub>20</sub> N <sub>2</sub> O <sub>4</sub> ●0.25CH <sub>4</sub> O | 59.36 | 7.34 | 9.72  |       |  |  |  | 59.28 | 7.14 | 9.52  |       |  |  |
| (R)-53  | C <sub>16</sub> H <sub>22</sub> N <sub>2</sub> O <sub>5</sub>                        | 59.61 | 6.88 | 8.69  |       |  |  |  | 59.50 | 6.90 | 8.56  |       |  |  |
| (S)-53  | C <sub>16</sub> H <sub>22</sub> N <sub>2</sub> O <sub>5</sub>                        | 59.61 | 6.88 | 8.69  |       |  |  |  | 59.51 | 6.90 | 8.58  |       |  |  |
| (R)-29  | C <sub>14</sub> H <sub>18</sub> N <sub>2</sub> O <sub>4</sub>                        | 60.42 | 6.52 | 10.07 |       |  |  |  | 60.40 | 6.57 | 9.90  |       |  |  |
| (S)-29  | C <sub>14</sub> H <sub>18</sub> N <sub>2</sub> O <sub>4</sub>                        | 60.42 | 6.52 | 10.07 |       |  |  |  | 60.13 | 6.49 | 9.91  |       |  |  |
| (R)-100 | C <sub>20</sub> H <sub>22</sub> N <sub>2</sub> O <sub>6</sub>                        | 62.17 | 5.74 | 7.25  |       |  |  |  | 62.02 | 5.78 | 7.22  |       |  |  |
| (R)-31  | C <sub>15</sub> H <sub>20</sub> N <sub>2</sub> O <sub>5</sub>                        | 58.43 | 6.54 | 9.09  |       |  |  |  | 58.40 | 6.43 | 8.91  |       |  |  |
| (R)-30  | C <sub>14</sub> H <sub>18</sub> N <sub>2</sub> O <sub>5</sub>                        | 57.13 | 6.16 | 9.52  |       |  |  |  | 57.10 | 6.18 | 9.30  |       |  |  |
| (R)-102 | C <sub>15</sub> H <sub>21</sub> N <sub>3</sub> O <sub>6</sub>                        | 53.09 | 6.24 | 12.38 |       |  |  |  | 52.99 | 6.35 | 11.98 |       |  |  |
| (R)-103 | C <sub>16</sub> H <sub>23</sub> N <sub>3</sub> O <sub>6</sub>                        | 54.38 | 6.56 | 11.89 |       |  |  |  | 54.54 | 6.60 | 11.70 |       |  |  |
| (R)-33  | C <sub>15</sub> H <sub>18</sub> F <sub>3</sub> N <sub>3</sub> O <sub>4</sub>         | 49.86 | 5.02 | 11.63 | 15.77 |  |  |  | 49.79 | 4.91 | 11.56 | 15.66 |  |  |
| (R)-51  | C <sub>12</sub> H <sub>17</sub> N <sub>3</sub> O <sub>3</sub>                        | 57.36 | 6.82 | 16.72 |       |  |  |  | 57.13 | 6.87 | 16.55 |       |  |  |
| (S)-51  | C <sub>12</sub> H <sub>17</sub> N <sub>3</sub> O <sub>3</sub>                        | 57.36 | 6.82 | 16.72 |       |  |  |  | 57.12 | 6.84 | 16.43 |       |  |  |
| (R)-52  | C <sub>12</sub> H <sub>15</sub> N <sub>5</sub> O <sub>3</sub>                        | 51.98 | 5.45 | 25.26 |       |  |  |  | 51.93 | 5.47 | 24.98 |       |  |  |
| (S)-52  | C <sub>12</sub> H <sub>15</sub> N <sub>5</sub> O <sub>3</sub>                        | 51.98 | 5.45 | 25.26 |       |  |  |  | 52.08 | 5.51 | 25.00 |       |  |  |
| (R)-34  | C <sub>13</sub> H <sub>17</sub> N <sub>5</sub> O <sub>3</sub>                        | 53.60 | 5.88 | 24.04 |       |  |  |  | 53.72 | 5.91 | 23.84 |       |  |  |

## Supporting Information

|         |                                                                                                                                  |       |      |       |  |       |       |       |       |      |       |  |       |       |
|---------|----------------------------------------------------------------------------------------------------------------------------------|-------|------|-------|--|-------|-------|-------|-------|------|-------|--|-------|-------|
| (S)-34  | C <sub>13</sub> H <sub>17</sub> N <sub>5</sub> O <sub>3</sub>                                                                    | 53.60 | 5.88 | 24.04 |  |       |       |       | 53.76 | 5.97 | 24.22 |  |       |       |
| (R)-104 | C <sub>19</sub> H <sub>22</sub> N <sub>2</sub> O <sub>5</sub>                                                                    | 63.51 | 6.20 | 7.80  |  |       |       |       | 63.24 | 6.26 | 7.72  |  |       |       |
| (R)-105 | C <sub>20</sub> H <sub>24</sub> N <sub>2</sub> O <sub>5</sub>                                                                    | 64.50 | 6.50 | 7.52  |  |       |       |       | 64.25 | 6.50 | 7.52  |  |       |       |
| (R)-35  | C <sub>14</sub> H <sub>20</sub> N <sub>2</sub> O <sub>4</sub>                                                                    | 59.99 | 7.19 | 9.99  |  |       |       |       | 60.04 | 7.32 | 9.86  |  |       |       |
| (R)-106 | C <sub>15</sub> H <sub>21</sub> ClN <sub>2</sub> O <sub>4</sub>                                                                  | 54.79 | 6.44 | 8.52  |  | 10.78 |       |       | 54.96 | 6.28 | 8.66  |  | 10.91 |       |
| (R)-107 | C <sub>16</sub> H <sub>23</sub> ClN <sub>2</sub> O <sub>4</sub>                                                                  | 56.06 | 6.77 | 8.17  |  | 10.34 |       |       | 56.19 | 6.77 | 8.17  |  | 10.07 |       |
| (R)-36  | C <sub>13</sub> H <sub>17</sub> ClN <sub>2</sub> O <sub>3</sub>                                                                  | 54.84 | 6.02 | 9.84  |  | 12.45 |       |       | 54.71 | 5.95 | 9.76  |  | 12.37 |       |
| (R)-108 | C <sub>15</sub> H <sub>21</sub> BrN <sub>2</sub> O <sub>4</sub>                                                                  | 48.27 | 5.67 | 7.51  |  |       | 21.41 |       | 48.08 | 5.63 | 7.44  |  |       | 21.41 |
| (R)-109 | C <sub>16</sub> H <sub>23</sub> BrN <sub>2</sub> O <sub>4</sub>                                                                  | 49.62 | 5.99 | 7.23  |  |       | 20.63 |       | 49.82 | 6.09 | 7.15  |  |       | 20.60 |
| (R)-110 | C <sub>11</sub> H <sub>16</sub> BrClN <sub>2</sub> O <sub>2</sub>                                                                | 40.83 | 4.98 | 8.66  |  | 10.96 | 24.69 |       | 40.71 | 4.97 | 8.71  |  | 11.06 | 24.74 |
| (R)-37  | C <sub>13</sub> H <sub>17</sub> BrN <sub>2</sub> O <sub>3</sub>                                                                  | 47.43 | 5.21 | 8.51  |  |       | 24.27 |       | 47.47 | 5.31 | 8.41  |  |       | 24.11 |
| (R)-111 | C <sub>15</sub> H <sub>21</sub> IN <sub>2</sub> O <sub>4</sub>                                                                   | 42.87 | 5.04 | 6.67  |  |       |       | 30.20 | 43.13 | 5.14 | 6.71  |  |       | 29.96 |
| (S)-111 | C <sub>15</sub> H <sub>21</sub> IN <sub>2</sub> O <sub>4</sub>                                                                   | 42.87 | 5.04 | 6.67  |  |       |       | 30.20 | 43.08 | 5.10 | 6.62  |  |       | 29.94 |
| (R)-112 | C <sub>16</sub> H <sub>23</sub> IN <sub>2</sub> O <sub>4</sub>                                                                   | 44.25 | 5.34 | 6.45  |  |       |       | 29.22 | 44.51 | 5.34 | 6.41  |  |       | 28.99 |
| (S)-112 | C <sub>16</sub> H <sub>23</sub> IN <sub>2</sub> O <sub>4</sub>                                                                   | 44.25 | 5.34 | 6.45  |  |       |       | 29.22 | 44.54 | 5.38 | 6.35  |  |       | 28.92 |
| (R)-38  | C <sub>13</sub> H <sub>17</sub> IN <sub>2</sub> O <sub>3</sub>                                                                   | 41.51 | 4.55 | 7.45  |  |       |       | 33.73 | 41.70 | 4.49 | 7.39  |  |       | 33.69 |
| (S)-38  | C <sub>13</sub> H <sub>17</sub> IN <sub>2</sub> O <sub>3</sub>                                                                   | 41.51 | 4.55 | 7.45  |  |       |       | 33.73 | 41.37 | 4.52 | 7.37  |  |       | 33.47 |
| (R)-116 | C <sub>6</sub> H <sub>11</sub> N <sub>2</sub> O <sub>4</sub>                                                                     | 44.72 | 6.88 | 8.69  |  |       |       |       | 44.71 | 6.74 | 8.66  |  |       |       |
| (R)-117 | C <sub>15</sub> H <sub>20</sub> Cl <sub>2</sub> N <sub>2</sub> O <sub>4</sub>                                                    | 49.60 | 5.55 | 7.71  |  | 19.52 |       |       | 49.62 | 5.54 | 7.70  |  | 19.65 |       |
| (R)-118 | C <sub>16</sub> H <sub>22</sub> Cl <sub>2</sub> N <sub>2</sub> O <sub>4</sub> •0.05C <sub>5</sub> H <sub>11</sub> O <sub>2</sub> | 50.98 | 5.92 | 7.34  |  | 18.57 |       |       | 51.36 | 5.95 | 7.35  |  | 18.20 |       |
| (R)-60  | C <sub>13</sub> H <sub>16</sub> Cl <sub>2</sub> N <sub>2</sub> O <sub>3</sub>                                                    | 48.92 | 5.05 | 8.78  |  | 22.21 |       |       | 49.14 | 5.01 | 8.80  |  | 22.12 |       |
| (R)-120 | C <sub>15</sub> H <sub>20</sub> Cl <sub>2</sub> N <sub>2</sub> O <sub>4</sub>                                                    | 49.60 | 5.55 | 7.71  |  | 19.52 |       |       | 49.63 | 5.62 | 7.64  |  | 19.65 |       |
| (R)-121 | C <sub>16</sub> H <sub>22</sub> Cl <sub>2</sub> N <sub>2</sub> O <sub>4</sub>                                                    | 50.94 | 5.88 | 7.43  |  | 18.79 |       |       | 51.15 | 6.02 | 7.35  |  | 18.92 |       |
| (R)-122 | C <sub>11</sub> H <sub>15</sub> Cl <sub>2</sub> N <sub>2</sub> O <sub>2</sub> •0.08H <sub>2</sub> O                              | 41.95 | 4.85 | 8.89  |  | 33.77 |       |       | 41.72 | 4.76 | 8.74  |  | 33.39 |       |
| (R)-61  | C <sub>13</sub> H <sub>16</sub> Cl <sub>2</sub> N <sub>2</sub> O <sub>3</sub>                                                    | 48.92 | 5.05 | 8.78  |  | 22.21 |       |       | 48.99 | 4.98 | 8.69  |  | 22.36 |       |

| No.    | Formula                                                         | Calcd. |      |       |      | Found |      |       |      |
|--------|-----------------------------------------------------------------|--------|------|-------|------|-------|------|-------|------|
|        |                                                                 | C      | H    | N     | S    | C     | H    | N     | S    |
| (R)-39 | C <sub>13</sub> H <sub>20</sub> N <sub>3</sub> O <sub>5</sub> S | 47.71  | 5.81 | 12.76 | 9.74 | 47.43 | 5.95 | 12.77 | 9.77 |



## Supporting Information

**Table S2.** Mass Spectra Data of Select Compounds.

| No.                     | Formula                                                                                      | Calcd.   | Found    |
|-------------------------|----------------------------------------------------------------------------------------------|----------|----------|
| <b>81</b>               | C <sub>8</sub> H <sub>6</sub> NO <sup>+</sup>                                                | 132.0443 | 132.0443 |
| <b>82</b>               | C <sub>9</sub> H <sub>13</sub> NOH <sup>+</sup>                                              | 152.1075 | 152.1075 |
| <i>(R)</i> - <b>86</b>  | C <sub>20</sub> H <sub>21</sub> F <sub>3</sub> N <sub>2</sub> O <sub>4</sub> H <sup>+</sup>  | 411.1538 | 411.1531 |
| <i>(R)</i> - <b>115</b> | C <sub>7</sub> H <sub>14</sub> NO <sub>4</sub> H <sup>+</sup>                                | 176.0918 | 176.0923 |
| <i>(R)</i> - <b>119</b> | C <sub>11</sub> H <sub>14</sub> Cl <sub>2</sub> N <sub>2</sub> O <sub>2</sub> H <sup>+</sup> | 277.08   | 277.05   |
